# Supplementary material for: Atroposelective synthesis of N-aryl peptoid atropisomers via a palladium(ii)-catalyzed asymmetric C–H alkynylation strategy
Source: Royal Society of Chemistry journal article supplement (doi:10.1039/d1sc01130h), 2021-01-01
Supplement: d1sc01130h1.pdf [file d1sc01130h1.pdf]

## Supporting Information

# Atroposelective Synthesis of *N*-Aryl Peptoid Atropisomers via Palladium(II)-Catalyzed Asymmetric C–H Alkynylation Strategy

Yong-Jie Wu,<sup>†a</sup> Pei-Pei Xie,<sup>†a</sup> Gang Zhou,<sup>a</sup> Qi-Jun Yao,<sup>\*a</sup> Xin Hong<sup>\*a</sup> and Bing-Feng Shi<sup>\*a,b</sup>

<sup>a</sup>Center of Chemistry for Frontier Technologies, Department of Chemistry, Zhejiang University,  
Hangzhou 310027, China

<sup>b</sup>Green Catalysis Center, and College of Chemistry, Zhengzhou University, Zhengzhou 450001, China

\*Email: [3110000156@zju.edu.cn](mailto:3110000156@zju.edu.cn) (Q.-J.Y.); [hxchem@zju.edu.cn](mailto:hxchem@zju.edu.cn) (X.H.); [bfshi@zju.edu.cn](mailto:bfshi@zju.edu.cn) (B.-F.S.)

<sup>†</sup>These authors contributed equally to this work.

# Content

|                                                                                                         |            |
|---------------------------------------------------------------------------------------------------------|------------|
| <b>1. General Information</b> .....                                                                     | <b>3</b>   |
| <b>2. Experimental Section</b> .....                                                                    | <b>4</b>   |
| <b>2.1 Preparation of Substrates</b> .....                                                              | <b>4</b>   |
| <b>2.2 Optimization of Reaction Conditions</b> .....                                                    | <b>22</b>  |
| <b>2.3 Palladium-Catalyzed Atroposelective Synthesis of N-Aryl Peptoid Atropisomers</b> ....            | <b>27</b>  |
| <b>2.3.1 General Procedure for Pd-Catalyzed Atroposelective Synthesis of Peptoid Atropisomers</b> ..... | <b>27</b>  |
| <b>2.3.2 Limitation of the Scope of Substrate and Alkyne</b> .....                                      | <b>42</b>  |
| <b>2.4 Gram-Scale Synthesis and Transformations</b> .....                                               | <b>43</b>  |
| <b>2.4.1 Gram-scale synthesis of 3h</b> .....                                                           | <b>43</b>  |
| <b>2.4.2 Transformations</b> .....                                                                      | <b>43</b>  |
| <b>3. Computational Details</b> .....                                                                   | <b>47</b>  |
| <b>3.1 Exploration of C–H activation transition state with HFIP solvent involvements</b> .....          | <b>47</b>  |
| <b>3.2 Conformers of C–H activation transition state without HFIP involvement</b> .....                 | <b>48</b>  |
| <b>3.3 Conformers of C–H activation transition state with one HFIP involvement</b> .....                | <b>49</b>  |
| <b>3.4 Conformers of C–H activation transition state with two HFIP involvements</b> .....               | <b>50</b>  |
| <b>3.5 Conformers of C–H activation transition state with three HFIP involvements</b> .....             | <b>51</b>  |
| <b>3.6 Conformers of C–H activation transition state with four HFIP involvements</b> .....              | <b>52</b>  |
| <b>3.7 Conformers of C–H activation transition state leading to (<i>S</i>)-axial chirality</b> .....    | <b>53</b>  |
| <b>3.8 Table of Energies</b> .....                                                                      | <b>54</b>  |
| <b>3.9 Cartesian coordinates of the structures</b> .....                                                | <b>55</b>  |
| <b>4. X-Ray Data of 3hb</b> .....                                                                       | <b>142</b> |
| <b>5. References</b> .....                                                                              | <b>143</b> |
| <b>6. NMR Spectra</b> .....                                                                             | <b>145</b> |
| <b>7. Copies of HPLC Analysis</b> .....                                                                 | <b>223</b> |

## 1. General Information

All the materials and solvents were purchased from commercial suppliers and used without additional purification.  $\text{Pd}(\text{MeCN})_2\text{Cl}_2$  were purchased from Adamas and used without additional purification. NMR spectra were recorded on a Bruker Avance operating for  $^1\text{H}$  NMR at 400 MHz,  $^{13}\text{C}$  NMR at 100 MHz, and  $^{19}\text{F}$  NMR at 376 MHz, using TMS as internal standard. The peaks were internally referenced to  $\text{CDCl}_3$  (7.26 ppm) or residual undeuterated solvent signal of  $\text{CDCl}_3$  (77.16 ppm for  $^{13}\text{C}$  NMR). The following abbreviations (or combinations thereof) were used to explain multiplicities: s = singlet, d = doublet, t = triplet, m = multiplet, br = broad. High-resolution mass spectra (HRMS) were recorded on an Agilent Mass spectrometer using ESI-TOF (electrospray ionization-time of flight). High pressure liquid chromatography (HPLC) analyses were performed on a Shimadzu instrument using a chiral stationary phase column (Daicel Co. CHIRALPAK). The chiral HPLC methods were calibrated with the corresponding racemic mixtures.

## 2. Experimental Section

### 2.1 Preparation of Substrates

#### Synthesis and Characterization of Starting Materials

**General Procedure A (Ugi reaction) for the Preparation of Compound *rac-1a-1m*, *rac-4a-4c*, *rac-4h-4p* and *rac-4u-4v*:**

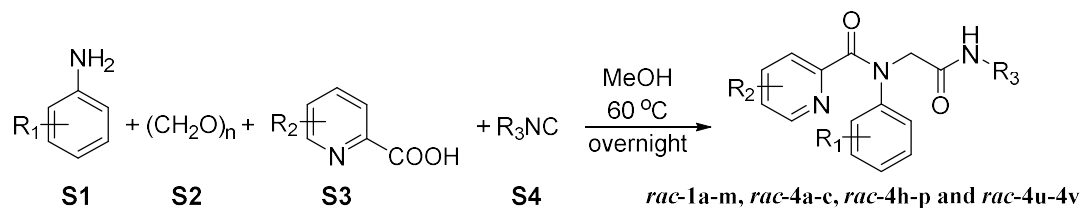

To a solution of the amine (**S1**) (5.0 mmol, 1.0 equiv) in methanol (10 mL, 0.5 M) was added paraformaldehyde (**S2**) (1.2 equiv). After being stirred for 1h at room temperature, picolinic acid (**S3**) (1.2 equiv) and isocyanide (**S4**) (1.2 equiv) was added. The mixture was then stirred overnight at 60 °C under air followed by cooling. The resulting mixture was filtered through a celite pad and concentrated in vacuo. The residue was purified by silica gel column chromatography to afford the product.<sup>1</sup>

**General Procedure B for the Preparation of Compound *rac-4d-4g*:**

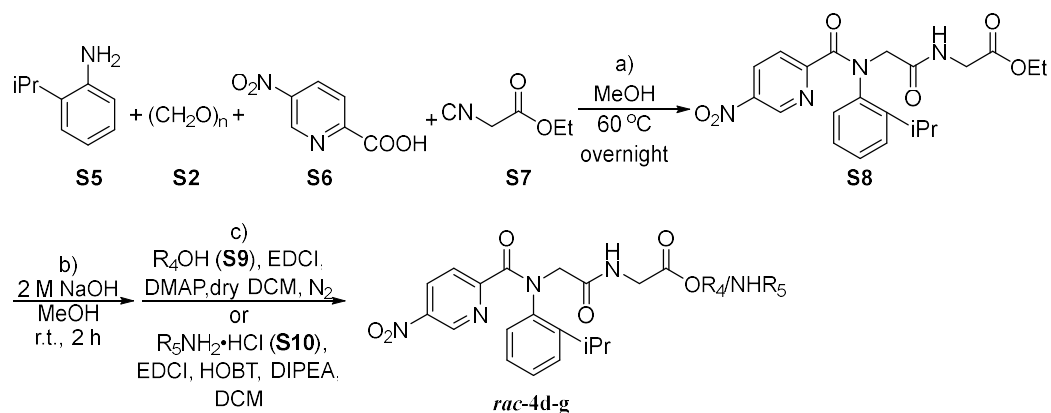

To a solution of the amine (**S5**) (5.0 mmol, 1.0 equiv) in methanol (10 mL, 0.5 M) was added paraformaldehyde (**S2**) (1.2 equiv). After being stirred for 1h at room temperature, picolinic acid (**S6**) (1.2 equiv) and isocyanide (**S7**) (1.2 equiv) was added. The mixture was then stirred overnight at 60 °C under air followed by cooling. The resulting mixture was filtered through a celite pad and concentrated in vacuo. The residue was purified by silica gel column chromatography to afford the product **S8**. Then **S8** was solved in MeOH (5 mL), 2 M NaOH (5 mL) was added into the solution at room temperature. After being stirred for extra 2 h, the reaction was quenched with 1 M HCl and diluted with ethyl acetate. The organic layer was washed by brine, and the combined organic phase was dried over anhydrous  $\text{Na}_2\text{SO}_4$ . Evaporation of organic solvent gave the corresponding product without any purification. Then the product was solved in anhydrous DCM (20 mL),  $R_4\text{OH}$  (**S9**) (2.0 equiv), EDCI (2.0 equiv) and DMAP (0.2 equiv) were added into the mixture in turn [or  $R_5\text{NH}_2$  (1.5 equiv), EDCI (2.0 equiv), HOBT (1.2



equiv) and DIPEA (3.0 equiv) were added into the mixture in turn]. After being stirred at room temperature overnight. The reaction was diluted with dichloromethane and water was added to the mixture. The aqueous phase was separated and the organic phase was washed with brine. The combined organic layers were dried over Na<sub>2</sub>SO<sub>4</sub>, filtered, concentrated, and the residue was purified by silica gel column chromatography to afford the product.

#### General Procedure C for the Preparation of Compound *rac*-4q-4s:

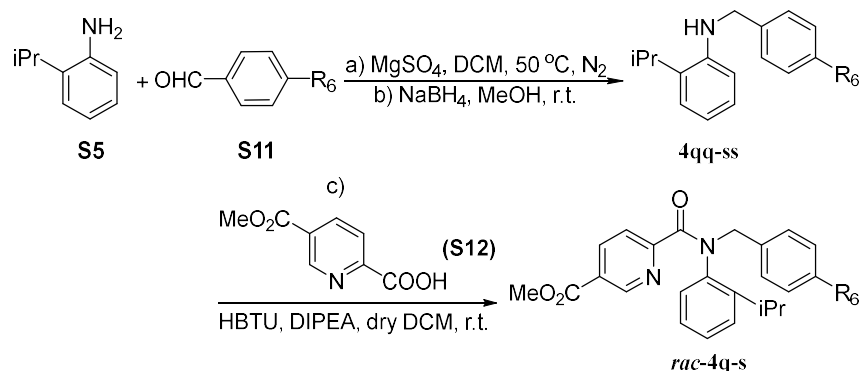

To a solution of the amine (**S5**) (10.0 mmol, 1.0 equiv) and aldehyde (**S11**) (1.5 equiv) in DCM (20 mL, 0.5 M) was added anhydrous MgSO<sub>4</sub>. The mixture was then stirred for 8 h at 50 °C under N<sub>2</sub> followed by cooling. The reaction mixture was filtered through a celite pad and then evaporation of organic solvent gave the corresponding product without any purification. Then the product was solved in MeOH (30 mL), and NaBH<sub>4</sub> (2.0 equiv) was added in portions. After being stirred for 4 h at room temperature, the reaction mixture was quenched with water and extracted with EtOAc. The combined organic layers were dried over Na<sub>2</sub>SO<sub>4</sub>, filtered, concentrated, and the residue was purified by silica gel column chromatography to afford the product **4qq-ss**. Then the product was solved in anhydrous DCM (30 mL), picolinic acid (**S12**) (1.5 equiv), HBTU (1.5 equiv) and DIPEA (3.0 equiv) were added into the mixture in turn. After being stirred at room temperature overnight. The reaction was diluted with dichloromethane and water was added to the mixture. The aqueous phase was separated and the organic phase was washed with brine. The combined organic layers were dried over Na<sub>2</sub>SO<sub>4</sub>, filtered, concentrated, and the residue was purified by silica gel column chromatography to afford the product.

#### General Procedure D for the Preparation of Compound *rac*-4t:

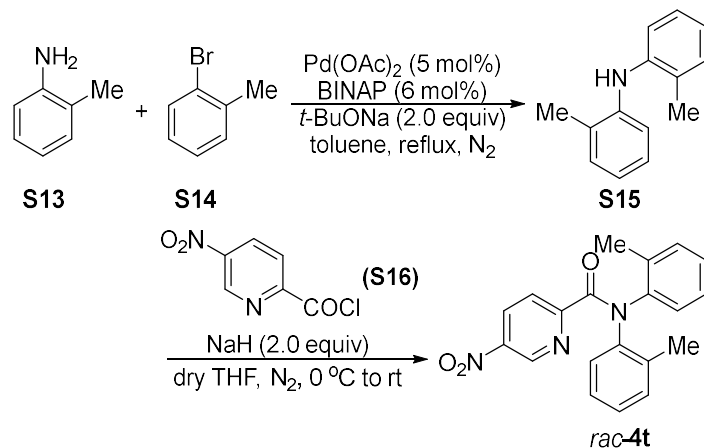

The *o*-toluidine (**S13**) (1.0 equiv) and 2-bromotoluene (**S14**) (1.0 equiv) was solved in toluene (0.5 M), Pd(OAc)<sub>2</sub> (5 mol%), BINAP (6 mol%) and *t*-BuONa (2.0 equiv) were added into the mixture in turn. Then the mixture was refluxed for 12 h under N<sub>2</sub> in oil bath. Afterwards the resulting solution was filtered through a plug of Celite and concentrated in vacuo. The residue was purified by silica gel column chromatography to afford the product **S15**. Then the product **S15** (1.5 equiv) was solved in anhydrous THF (0.5 M), NaH (2.0 equiv, 60% dispersion in mineral oil) was added into the solution under the N<sub>2</sub> atmosphere at 0 °C, and the mixture was stirred for extra 1h. Then the picolinoyl chloride (**S16**) (1.0 equiv) was solved in anhydrous THF and added into the system dropwise, then warm to room temperature overnight. After being stirred overnight, the reaction was quenched with water at 0 °C and diluted with ethyl acetate. The organic layer was washed by brine, and the combined organic phase was dried over anhydrous Na<sub>2</sub>SO<sub>4</sub>. Evaporation of organic solvent and purification by column chromatography gave the corresponding product *rac*-**4t**.

#### Methyl *N*-(2-isopropylphenyl)-*N*-picolinoylglycylglycinate (*rac*-**1a**)

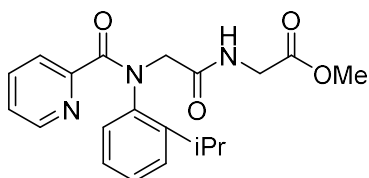

The title compound *rac*-**1a** was prepared according to the general procedure A and was purified by flash chromatography (petroleum ether: ethyl acetate: triethylamine = 1: 1: 1%). *rac*-**1a** was obtained as a light yellow solid, *E*: *Z* = 4: 1.

<sup>1</sup>H NMR (400 MHz, CDCl<sub>3</sub>) δ 8.27 (d, *J* = 4.6 Hz, 1H), 7.59-7.52 (m, 2H), 7.38-7.35 (m, 1H), 7.25 (d, *J* = 8.7 Hz, 1H), 7.17 (d, *J* = 3.9 Hz, 2H), 7.12-7.09 (m, 1H), 7.04-7.00 (m, 1H), 4.94 (d, *J* = 14.9 Hz, 1H), 4.21 (dd, *J* = 18.2, 5.9 Hz, 1H), 4.01 (dd, *J* = 18.2, 5.0 Hz, 1H), 3.98 (d, *J* = 14.8 Hz, 1H), 3.76 (s, 3H), 3.15-3.09 (m, 1H), 1.16 (d, *J* = 6.8 Hz, 3H), 0.99 (d, *J* = 6.8 Hz, 3H); <sup>13</sup>C NMR (101 MHz, CDCl<sub>3</sub>) δ 170.26, 169.92, 168.76, 152.79, 148.28, 145.59, 140.35, 136.09, 129.02, 128.70, 126.86, 126.44, 124.43, 123.94, 55.27, 52.42, 41.20, 27.99, 24.88, 22.85; HRMS (ESI-TOF) calcd for [C<sub>20</sub>H<sub>23</sub>N<sub>3</sub>O<sub>4</sub>+Na<sup>+</sup>]: 392.1581, found: 392.1581.

#### Methyl *N*-benzoyl-*N*-(2-isopropylphenyl)glycylglycinate (*rac*-**1b**)

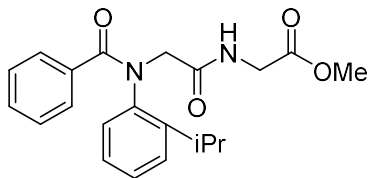

The title compound *rac*-**1b** was prepared according to the general procedure A and purified by flash chromatography (petroleum ether: ethyl acetate: triethylamine = 1: 1: 1%). *rac*-**1b** was obtained as a brown solid, *E*: *Z* > 99: 1.

<sup>1</sup>H NMR (400 MHz, CDCl<sub>3</sub>) δ 7.35 (dd, *J* = 22.7, 7.5 Hz, 4H), 7.25-7.11 (m, 6H), 4.84 (d, *J* = 14.8 Hz, 1H), 4.19-3.99 (m, 3H), 3.75 (s, 3H), 2.96-2.89 (m, 1H), 1.08 (d, *J* = 6.8 Hz, 3H), 0.73 (d, *J* = 6.8 Hz, 3H); <sup>13</sup>C NMR (101 MHz, CDCl<sub>3</sub>) δ 171.55, 170.26, 169.02, 145.16, 140.69, 134.46, 130.23, 128.94, 128.91, 127.63, 127.22, 126.96, 55.57, 52.37, 41.16, 27.71, 25.21, 22.30; HRMS (ESI-TOF) calcd for

[C<sub>21</sub>H<sub>24</sub>N<sub>2</sub>O<sub>4</sub>+Na<sup>+</sup>]: 391.1628, found: 391.1629.

**Methyl *N*-(*N*-benzoyl-*N*-(2-isopropylphenyl)glycyl)-*N*-(tert-butoxycarbonyl)glycinate (*rac*-1c)**

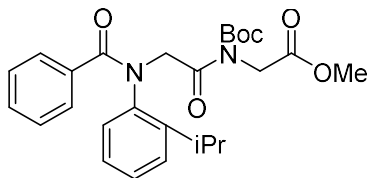

The title compound ***rac*-1c** was prepared according to the general procedure A then reacted with Boc<sub>2</sub>O and purified by flash chromatography (petroleum ether: ethyl acetate = 8: 1). ***rac*-1c** was obtained as light yellow solid, *E*: *Z* > 99: 1.

<sup>1</sup>H NMR (400 MHz, CDCl<sub>3</sub>) δ 7.40 (d, *J* = 8.0 Hz, 1H), 7.32 (d, *J* = 7.6 Hz, 2H), 7.21-7.15 (m, 3H), 7.13-7.05 (m, 3H), 5.51 (d, *J* = 17.8 Hz, 1H), 4.66-4.54 (m, 2H), 4.41 (d, *J* = 17.3 Hz, 1H), 3.72 (s, 3H), 3.20-3.13 (m, 1H), 1.49 (s, 9H), 1.16 (d, *J* = 6.8 Hz, 3H), 0.85 (d, *J* = 6.8 Hz, 3H); <sup>13</sup>C NMR (101 MHz, CDCl<sub>3</sub>) δ 170.71, 170.66, 169.30, 151.90, 145.36, 141.23, 135.10, 129.79, 129.33, 128.81, 128.46, 127.48, 126.94, 126.60, 84.38, 57.16, 52.26, 45.39, 27.88, 27.63, 25.12, 22.43; **HRMS (ESI-TOF)** calcd for [C<sub>26</sub>H<sub>32</sub>N<sub>2</sub>O<sub>6</sub>+Na<sup>+</sup>]: 491.2152, found: 491.2154.

**Methyl *N*-(2-isopropylphenyl)-*N*-(isoquinoline-3-carbonyl)glycylglycinate (*rac*-1d)**

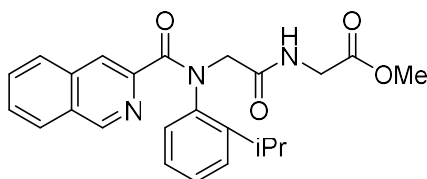

The title compound ***rac*-1d** was prepared according to the general procedure A and purified by flash chromatography (petroleum ether: ethyl acetate: triethylamine = 1: 1: 1%). ***rac*-1d** was obtained as a light yellow solid, *E*: *Z* = 5: 1.

<sup>1</sup>H NMR (400 MHz, CDCl<sub>3</sub>) δ 8.04 (d, *J* = 8.5 Hz, 1H), 7.73-7.67 (m, 3H), 7.57 (t, *J* = 7.2 Hz, 1H), 7.46 (t, *J* = 7.4 Hz, 1H), 7.41 (d, *J* = 5.9 Hz, 1H), 7.33 (d, *J* = 7.7 Hz, 1H), 7.16-7.10 (m, 2H), 7.01-6.97 (m, 1H), 5.05 (d, *J* = 14.9 Hz, 1H), 4.22 (dd, *J* = 18.1, 6.0 Hz, 1H), 4.04 (dd, *J* = 18.1, 5.0 Hz, 1H), 4.00 (d, *J* = 14.9 Hz, 1H), 3.75 (s, 3H), 3.27-3.17 (m, 1H), 1.18 (d, *J* = 6.8 Hz, 3H), 1.03 (d, *J* = 6.8 Hz, 3H); <sup>13</sup>C NMR (101 MHz, CDCl<sub>3</sub>) δ 170.27, 169.76, 168.70, 152.45, 146.52, 145.45, 140.54, 136.24, 129.77, 129.63, 129.09, 128.63, 127.71, 127.61, 127.43, 126.80, 126.37, 120.66, 55.33, 52.39, 41.22, 27.98, 24.78, 23.10; **HRMS (ESI-TOF)** calcd for [C<sub>24</sub>H<sub>25</sub>N<sub>3</sub>O<sub>4</sub>+Na<sup>+</sup>]: 442.1737, found: 442.1739.

**Methyl *N*-(2-isopropylphenyl)-*N*-(pyrimidine-2-carbonyl)glycylglycinate (*rac*-1e)**

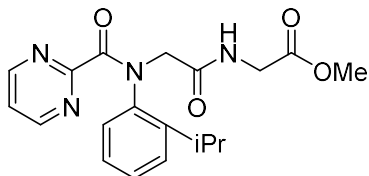

The title compound ***rac*-1e** was prepared according to the general procedure A and purified by flash chromatography (petroleum ether: ethyl acetate: triethylamine = 1: 1: 1%). ***rac*-1e** was obtained as a light yellow solid, *E*: *Z* = 8: 1.

**<sup>1</sup>H NMR (400 MHz, (CD<sub>3</sub>)<sub>2</sub>SO)** δ 8.65 (d, *J* = 4.9 Hz, 2H), 8.53 (t, *J* = 5.8 Hz, 1H), 7.34-7.31 (m, 2H), 7.27 (dd, *J* = 7.9, 1.6 Hz, 1H), 7.18 (td, *J* = 7.4, 1.4 Hz, 1H), 6.99 (td, *J* = 7.6, 1.6 Hz, 1H), 5.00 (d, *J* = 16.0 Hz, 1H), 3.96 (d, *J* = 5.8 Hz, 2H), 3.85 (d, *J* = 16.0 Hz, 1H), 3.66 (s, 3H), 3.27-3.20 (m, 1H), 1.22 (dd, *J* = 9.8, 6.9 Hz, 6H); **<sup>13</sup>C NMR (101 MHz, (CD<sub>3</sub>)<sub>2</sub>SO)** δ 170.65, 167.91, 166.69, 162.15, 157.26, 146.52, 139.17, 131.15, 129.10, 126.90, 126.03, 121.56, 52.18, 51.84, 41.06, 27.88, 24.81, 23.42; **HRMS (ESI-TOF)** calcd for [C<sub>19</sub>H<sub>22</sub>N<sub>4</sub>O<sub>4</sub>+Na<sup>+</sup>]: 393.1533, found: 393.1534.

**Methyl *N*-(2-isopropylphenyl)-*N*-(5-methoxypicolinoyl)glycylglycinate (*rac*-1f)**

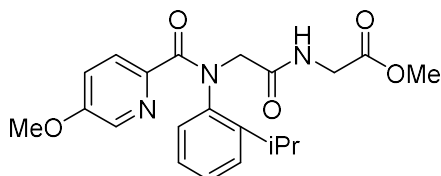

The title compound ***rac*-1f** was prepared according to the general procedure A and purified by flash chromatography (petroleum ether: ethyl acetate: triethylamine = 1: 1: 1%). ***rac*-1f** was obtained as a reddish brown solid, *E*: *Z* = 4: 1.

**<sup>1</sup>H NMR (400 MHz, CDCl<sub>3</sub>)** δ 7.88 (d, *J* = 2.7 Hz, 1H), 7.56 (d, *J* = 8.8 Hz, 1H), 7.44 (t, *J* = 5.8 Hz, 1H), 7.22-7.16 (m, 3H), 7.04-7.00 (m, 2H), 4.88 (d, *J* = 14.9 Hz, 1H), 4.15 (dd, *J* = 18.1, 5.9 Hz, 1H), 4.01-3.94 (m, 2H), 3.73 (s, 3H), 3.72 (s, 3H), 3.11-3.04 (m, 1H), 1.14 (d, *J* = 6.9 Hz, 3H), 0.96 (d, *J* = 6.8 Hz, 3H); **<sup>13</sup>C NMR (101 MHz, CDCl<sub>3</sub>)** δ 170.22, 169.40, 168.92, 156.04, 145.40, 144.59, 141.03, 135.96, 128.70, 128.37, 126.78, 126.34, 125.41, 119.49, 55.53, 55.49, 52.29, 41.14, 27.96, 24.72, 22.92; **HRMS (ESI-TOF)** calcd for [C<sub>21</sub>H<sub>25</sub>N<sub>3</sub>O<sub>5</sub>+Na<sup>+</sup>]: 422.1686, found: 422.1687.

**Methyl *N*-(2-isopropylphenyl)-*N*-(5-(trifluoromethyl)picolinoyl)glycylglycinate (*rac*-1g)**

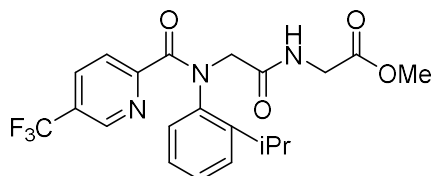

The title compound ***rac*-1g** was prepared according to the general procedure A and purified by flash chromatography (petroleum ether: ethyl acetate: triethylamine = 1: 1: 1%). ***rac*-1g** was obtained as a brown solid, *E*: *Z* = 7: 1.

**<sup>1</sup>H NMR (400 MHz, CDCl<sub>3</sub>)** δ 8.46 (s, 1H), 7.80 (dd, *J* = 8.2, 2.2 Hz, 1H), 7.70 (d, *J* = 8.2 Hz, 1H), 7.30-7.25 (m, 1H), 7.22-7.14 (m, 3H), 6.98-6.94 (m, 1H), 4.97 (d, *J* = 15.1 Hz, 1H), 4.12 (dd, *J* = 18.3, 6.0 Hz, 1H), 3.99 (dd, *J* = 18.1, 5.2 Hz, 1H), 3.91 (d, *J* = 15.1 Hz, 1H), 3.70 (s, 3H), 3.17-3.10 (m, 1H), 1.15 (d, *J* = 6.9 Hz, 3H), 1.05 (d, *J* = 6.8 Hz, 3H); **<sup>13</sup>C NMR (101 MHz, CDCl<sub>3</sub>)** δ 170.26, 168.49, 168.20, 156.13, 145.71, 144.96 (q, *J*<sub>CF</sub> = 4.0 Hz), 139.83, 133.51 (q, *J*<sub>CF</sub> = 3.0 Hz), 129.03, 129.01, 127.19 (q, *J*<sub>CF</sub> = 19.2 Hz), 126.96, 126.48, 125.47 (q, *J*<sub>CF</sub> = 235.3 Hz), 123.73, 54.94, 52.39, 41.16, 28.02, 24.69, 22.94; **<sup>19</sup>F NMR (376 MHz, CDCl<sub>3</sub>)** δ -62.70; **HRMS (ESI-TOF)** calcd for [C<sub>21</sub>H<sub>22</sub>F<sub>3</sub>N<sub>3</sub>O<sub>4</sub>+Na<sup>+</sup>]: 460.1454, found: 460.1455.

**Methyl 6-((2-isopropylphenyl)(2-((2-methoxy-2-oxoethyl)amino)-2-oxoethyl)carbamoyl)nicotinate (*rac*-1h)**

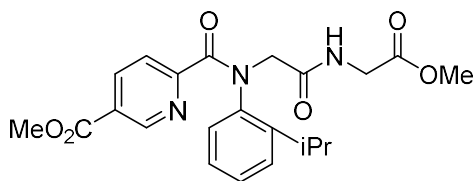

The title compound **rac-1h** was prepared according to the general procedure A and purified by flash chromatography (petroleum ether: ethyl acetate: triethylamine = 4: 1: 1%). **rac-1h** was obtained as a light yellow solid, *E*: *Z* = 5: 1.

**<sup>1</sup>H NMR (400 MHz, CDCl<sub>3</sub>)** δ 8.83 (s, 1H), 8.17 (d, *J* = 8.1 Hz, 1H), 7.63 (d, *J* = 8.1 Hz, 1H), 7.37 (t, *J* = 5.7 Hz, 1H), 7.25 (d, *J* = 7.6 Hz, 1H), 7.19-7.14 (m, 2H), 7.01-6.94 (m, 1H), 4.99 (d, *J* = 15.0 Hz, 1H), 4.15 (dd, *J* = 18.2, 4.9 Hz, 1H), 4.02 (dd, *J* = 17.7, 4.9 Hz, 1H), 3.94 (d, *J* = 15.8 Hz, 1H), 3.86 (s, 3H), 3.73 (s, 3H), 3.19-3.13 (m, 1H), 1.16 (d, *J* = 6.2 Hz, 3H), 1.07 (d, *J* = 6.1 Hz, 3H); **<sup>13</sup>C NMR (101 MHz, CDCl<sub>3</sub>)** δ 170.28, 168.94, 168.36, 164.99, 156.40, 149.23, 145.73, 139.87, 137.26, 129.19, 128.88, 126.85, 126.37, 125.97, 123.39, 54.63, 52.47, 52.30, 41.14, 27.93, 24.73, 22.88; **HRMS (ESI-TOF)** calcd for [C<sub>22</sub>H<sub>25</sub>N<sub>3</sub>O<sub>6</sub>+Na<sup>+</sup>]: 450.1635, found: 450.1637.

**Methyl N-(2-isopropylphenyl)-N-(5-nitropicolinoyl)glycylglycinate (rac-1i)**

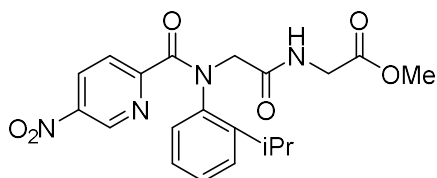

The title compound **rac-1i** was prepared according to the general procedure A and purified by flash chromatography (petroleum ether: ethyl acetate: triethylamine = 4: 1: 1%). **rac-1i** was obtained as a reddish brown solid, *E*: *Z* = 10: 1.

**<sup>1</sup>H NMR (400 MHz, CDCl<sub>3</sub>)** δ 8.98 (d, *J* = 2.3 Hz, 1H), 8.36 (dd, *J* = 8.6, 2.6 Hz, 1H), 7.79 (d, *J* = 8.6 Hz, 1H), 7.20-7.12 (m, 4H), 6.95 (td, *J* = 6.9, 2.0 Hz, 1H), 4.98 (d, *J* = 15.1 Hz, 1H), 4.14 (dd, *J* = 18.2, 5.8 Hz, 1H), 4.01 (dd, *J* = 18.2, 5.2 Hz, 1H), 3.90 (d, *J* = 15.1 Hz, 1H), 3.72 (s, 3H), 3.21-3.12 (m, 1H), 1.17 (d, *J* = 6.9 Hz, 3H), 1.12 (d, *J* = 6.8 Hz, 3H). **<sup>13</sup>C NMR (101 MHz, CDCl<sub>3</sub>)** δ 170.31, 167.91, 167.89, 158.00, 145.90, 143.62, 143.44, 139.43, 131.51, 129.28, 129.17, 127.11, 126.56, 124.33, 54.74, 52.48, 41.18, 28.07, 24.70, 23.05; **HRMS (ESI-TOF)** calcd for [C<sub>20</sub>H<sub>22</sub>N<sub>4</sub>O<sub>6</sub>+Na<sup>+</sup>]: 437.1431, found: 437.1430.

**Methyl N-(5-bromopicolinoyl)-N-(2-isopropylphenyl)glycylglycinate (rac-1j)**

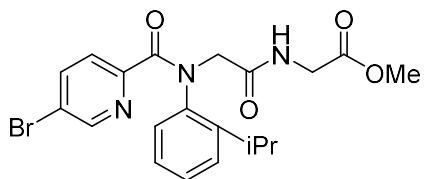

The title compound **rac-1j** was prepared according to the general procedure A and purified by flash chromatography (petroleum ether: ethyl acetate: triethylamine = 1: 1: 1%). **rac-1j** was obtained as a white solid, *E*: *Z* = 5: 1.

**<sup>1</sup>H NMR (400 MHz, CDCl<sub>3</sub>)** δ 8.29 (d, *J* = 1.9 Hz, 1H), 7.74 (dd, *J* = 8.3, 2.3 Hz, 1H), 7.53 (d, *J* = 8.3 Hz, 1H), 7.21-7.17 (m, 4H), 7.04-7.00 (m, 1H), 4.93 (d, *J* = 14.8 Hz, 1H), 4.21 (dd, *J* = 18.2, 6.0 Hz, 1H), 4.02 (dd, *J* = 18.2, 5.0 Hz, 1H), 3.93 (d, *J* = 14.8 Hz, 1H), 3.77 (s, 3H), 3.16-3.09 (m, 1H), 1.19 (d,

$J = 6.9$  Hz, 3H), 1.06 (d,  $J = 6.8$  Hz, 3H);  $^{13}\text{C}$  NMR (101 MHz,  $\text{CDCl}_3$ )  $\delta$  170.29, 168.92, 168.47, 151.09, 149.20, 145.63, 140.28, 138.91, 128.91, 128.87, 126.99, 126.52, 125.47, 122.01, 55.27, 52.46, 41.21, 28.05, 24.75, 23.04; **HRMS** (ESI-TOF) calcd for  $[\text{C}_{20}\text{H}_{22}\text{BrN}_3\text{O}_4 + \text{Na}^+]$ : 470.0686, found: 470.0687.

**Methyl *N*-(5-fluoropicolinoyl)-*N*-(2-isopropylphenyl)glycylglycinate (*rac*-1k)**

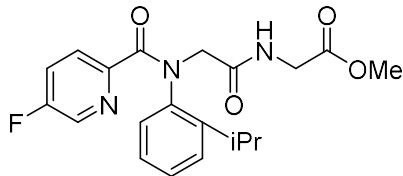

The title compound ***rac*-1k** was prepared according to the general procedure A and purified by flash chromatography (petroleum ether: ethyl acetate: triethylamine = 1: 1: 1%). ***rac*-1k** was obtained as a light yellow solid, *E*: *Z* = 6: 1.

$^1\text{H}$  NMR (400 MHz,  $\text{CDCl}_3$ )  $\delta$  8.03 (d,  $J = 2.8$  Hz, 1H), 7.62 (dd,  $J = 8.7, 4.4$  Hz, 1H), 7.33 (t,  $J = 5.4$  Hz, 1H), 7.25 (td,  $J = 8.4, 2.8$  Hz, 1H), 7.20-7.14 (m, 3H), 7.00-6.95 (m, 1H), 4.91 (d,  $J = 15.0$  Hz, 1H), 4.12 (dd,  $J = 18.1, 5.9$  Hz, 1H), 3.98 (dd,  $J = 18.2, 5.2$  Hz, 1H), 3.91 (d,  $J = 15.0$  Hz, 1H), 3.70 (s, 3H), 3.12-3.05 (m, 1H), 1.13 (d,  $J = 6.9$  Hz, 3H), 1.00 (d,  $J = 6.8$  Hz, 3H);  $^{13}\text{C}$  NMR (101 MHz,  $\text{CDCl}_3$ )  $\delta$  170.27, 168.63, 168.52, 159.18 (d,  $J_{\text{CF}} = 262.6$  Hz), 148.86 (d,  $J_{\text{CF}} = 4.0$  Hz), 145.53, 140.47, 136.41 (d,  $J_{\text{CF}} = 24.2$  Hz), 128.92, 128.64, 126.80, 126.35, 125.73 (d,  $J_{\text{CF}} = 5.1$  Hz), 122.82 (d,  $J_{\text{CF}} = 19.2$  Hz), 55.03, 52.30, 41.12, 27.94, 24.68, 22.90;  $^{19}\text{F}$  NMR (376 MHz,  $\text{CDCl}_3$ )  $\delta$  -123.33; **HRMS** (ESI-TOF) calcd for  $[\text{C}_{20}\text{H}_{22}\text{FN}_3\text{O}_4 + \text{Na}^+]$ : 410.1486, found: 410.1488.

**Methyl *N*-(4-chloropicolinoyl)-*N*-(2-isopropylphenyl)glycylglycinate (*rac*-1l)**

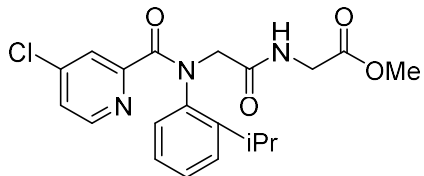

The title compound ***rac*-1l** was prepared according to the general procedure A and purified by flash chromatography (petroleum ether: ethyl acetate: triethylamine = 1: 1: 1%). ***rac*-1l** was obtained as a light yellow solid, *E*: *Z* = 5: 1.

$^1\text{H}$  NMR (400 MHz,  $\text{CDCl}_3$ )  $\delta$  8.12 (d,  $J = 5.2$  Hz, 1H), 7.62 (d,  $J = 1.7$  Hz, 1H), 7.21-7.18 (m, 4H), 7.11 (dd,  $J = 5.3, 2.0$  Hz, 1H), 7.04-6.99 (m, 1H), 4.93 (d,  $J = 14.9$  Hz, 1H), 4.19 (dd,  $J = 18.2, 5.8$  Hz, 1H), 4.02 (dd,  $J = 18.2, 5.1$  Hz, 1H), 3.94 (d,  $J = 14.9$  Hz, 1H), 3.77 (s, 3H), 3.17-3.10 (m, 1H), 1.18 (d,  $J = 6.8$  Hz, 3H), 1.08 (d,  $J = 6.8$  Hz, 3H);  $^{13}\text{C}$  NMR (101 MHz,  $\text{CDCl}_3$ )  $\delta$  170.20, 168.66, 168.35, 154.15, 149.01, 145.64, 144.32, 140.04, 129.01, 128.85, 126.90, 126.45, 124.66, 124.45, 55.14, 52.40, 41.19, 28.03, 24.77, 22.91; **HRMS** (ESI-TOF) calcd for  $[\text{C}_{20}\text{H}_{22}\text{ClN}_3\text{O}_4 + \text{Na}^+]$ : 426.1191, found: 426.1194.

**Methyl *N*-(6-bromopicolinoyl)-*N*-(2-isopropylphenyl)glycylglycinate (*rac*-1m)**

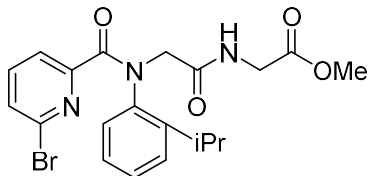

The title compound **rac-1m** was prepared according to the general procedure A and purified by flash chromatography (petroleum ether: ethyl acetate: triethylamine = 1: 1: 1%). **rac-1m** was obtained as a light yellow solid, *E*: *Z* = 8: 1.

<sup>1</sup>H NMR (400 MHz, CDCl<sub>3</sub>) δ 7.59 (d, *J* = 7.6 Hz, 1H), 7.44 (t, *J* = 7.8 Hz, 1H), 7.27 (d, *J* = 7.6 Hz, 1H), 7.24-7.16 (m, 4H), 7.00 (td, *J* = 6.8, 2.0 Hz, 1H), 4.94 (d, *J* = 14.9 Hz, 1H), 4.15 (dd, *J* = 18.2, 5.8 Hz, 1H), 4.00 (dd, *J* = 18.2, 5.1 Hz, 1H), 3.91 (d, *J* = 15.0 Hz, 1H), 3.73 (s, 3H), 3.14-3.07 (m, 1H), 1.17 (d, *J* = 6.9 Hz, 3H), 1.13 (d, *J* = 6.8 Hz, 3H); <sup>13</sup>C NMR (101 MHz, CDCl<sub>3</sub>) δ 170.25, 168.34, 167.86, 153.26, 145.56, 140.24, 140.02, 138.46, 129.11, 128.93, 128.82, 126.95, 126.35, 123.04, 54.96, 52.37, 41.17, 27.99, 24.80, 23.05; **HRMS (ESI-TOF)** calcd for [C<sub>20</sub>H<sub>22</sub>BrN<sub>3</sub>O<sub>4</sub>+Na<sup>+</sup>]: 470.0686, found: 470.0687.

**Methyl 6-((2-((2,6-dimethylphenyl)amino)-2-oxoethyl)(2-isopropylphenyl)carbamoyl)nicotinate (*rac-4a*)**

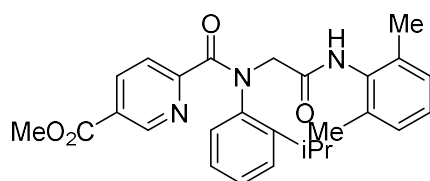

The title compound **rac-4a** was prepared according to the general procedure A and purified by flash chromatography (petroleum ether: ethyl acetate: triethylamine = 1: 1: 1%). **rac-4a** was obtained as a white solid, *E*: *Z* = 11: 1.

<sup>1</sup>H NMR (400 MHz, CDCl<sub>3</sub>) δ 8.84 (s, 1H), 8.21-8.18 (m, 2H), 7.61 (d, *J* = 8.1 Hz, 1H), 7.24-7.19 (m, 3H), 7.10-7.06 (m, 3H), 6.99 (td, *J* = 7.7, 2.3 Hz, 1H), 5.12 (d, *J* = 14.9 Hz, 1H), 4.03 (d, *J* = 14.9 Hz, 1H), 3.88 (s, 3H), 3.24-3.16 (m, 1H), 2.29 (s, 6H), 1.23 (d, *J* = 6.8 Hz, 3H), 1.11 (d, *J* = 6.8 Hz, 3H); <sup>13</sup>C NMR (101 MHz, CDCl<sub>3</sub>) δ 169.23, 166.66, 165.00, 156.31, 149.34, 145.74, 140.19, 137.38, 135.28, 133.68, 129.11, 129.03, 128.22, 127.32, 127.05, 126.38, 126.13, 123.24, 55.56, 52.53, 28.12, 24.80, 22.96, 18.60; **HRMS (ESI-TOF)** calcd for [C<sub>27</sub>H<sub>29</sub>N<sub>3</sub>O<sub>4</sub>+Na<sup>+</sup>]: 482.2050, found: 482.2052.

**Methyl 6-((2-(cyclohexylamino)-2-oxoethyl)(2-isopropylphenyl)carbamoyl)nicotinate (*rac-4b*)**

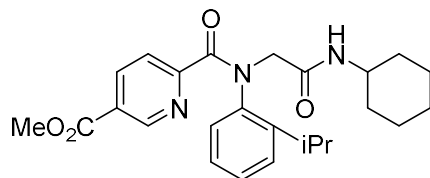

The title compound **rac-4b** was prepared according to the general procedure A and purified by flash chromatography (petroleum ether: ethyl acetate: triethylamine = 1: 1: 1%). **rac-4b** was obtained as a white solid, *E*: *Z* = 7: 1.

<sup>1</sup>H NMR (400 MHz, CDCl<sub>3</sub>) δ 8.84 (s, 1H), 8.18 (d, *J* = 8.1 Hz, 1H), 7.58 (d, *J* = 8.1 Hz, 1H), 7.17-7.13 (m, 3H), 7.02-6.96 (m, 1H), 6.57 (d, *J* = 8.2 Hz, 1H), 4.80 (d, *J* = 14.8 Hz, 1H), 3.92 (d, *J* = 15.0 Hz, 1H), 3.87 (s, 3H), 3.16-3.10 (m, 1H), 1.99-1.89 (m, 2H), 1.74-1.68 (m, 2H), 1.62-1.57 (m, 1H), 1.43-1.32 (m, 2H), 1.29-1.21 (m, 4H), 1.18 (d, *J* = 6.7 Hz, 3H), 1.04 (d, *J* = 6.8 Hz, 3H); <sup>13</sup>C NMR (101 MHz, CDCl<sub>3</sub>) δ 168.99, 167.05, 165.02, 156.52, 149.31, 145.76, 140.06, 137.27, 129.04, 128.86, 126.89, 126.35, 126.01, 123.24, 55.49, 52.49, 48.33, 33.03, 32.86, 27.99, 25.52, 24.87, 24.70, 24.00, 22.86; **HRMS (ESI-TOF)** calcd for [C<sub>25</sub>H<sub>31</sub>N<sub>3</sub>O<sub>4</sub>+Na<sup>+</sup>]: 460.2207, found: 460.2209.

**Methyl 6-((2-((2-ethoxy-2-oxoethyl)amino)-2-oxoethyl)(2-isopropylphenyl)carbamoyl)nicotinate (*rac-4c*)**

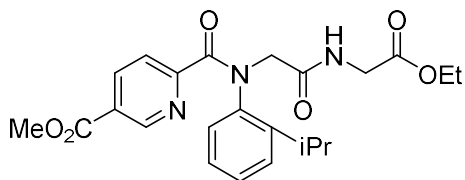

The title compound ***rac-4c*** was prepared according to the general procedure A and purified by flash chromatography (petroleum ether: ethyl acetate: triethylamine = 1: 1: 1%). ***rac-4c*** was obtained as a light yellow solid, *E*: *Z* = 7: 1.

**<sup>1</sup>H NMR (400 MHz, CDCl<sub>3</sub>)** δ 8.84 (s, 1H), 8.19 (dd, *J* = 8.2, 2.1 Hz, 1H), 7.66 (d, *J* = 8.1 Hz, 1H), 7.22-7.15 (m, 4H), 7.01-6.97 (m, 1H), 4.97 (d, *J* = 14.9 Hz, 1H), 4.26-4.17 (m, 3H), 4.01 (dd, *J* = 14.9, 4.9 Hz, 1H), 3.93 (d, *J* = 14.8 Hz, 1H), 3.88 (s, 3H), 3.19-3.13 (m, 1H), 1.29 (t, *J* = 7.1 Hz, 3H), 1.19 (d, *J* = 6.9 Hz, 3H), 1.08 (d, *J* = 6.8 Hz, 3H); **<sup>13</sup>C NMR (101 MHz, CDCl<sub>3</sub>)** δ 169.76, 169.09, 168.28, 165.05, 156.35, 149.26, 145.77, 139.88, 137.30, 129.11, 128.94, 126.94, 126.43, 126.05, 123.47, 61.56, 55.02, 52.49, 41.37, 28.02, 24.78, 22.94, 14.18; **HRMS (ESI-TOF)** calcd for [C<sub>23</sub>H<sub>27</sub>N<sub>3</sub>O<sub>6</sub>+Na<sup>+</sup>]: 464.1792, found: 464.1792.

**(1*R*,2*S*,5*R*)-2-isopropyl-5-methylcyclohexyl glycyglycinate (*rac-4d*)**

***N*-(2-isopropylphenyl)-*N*-(5-nitropicolinoyl)glycyglycinate**

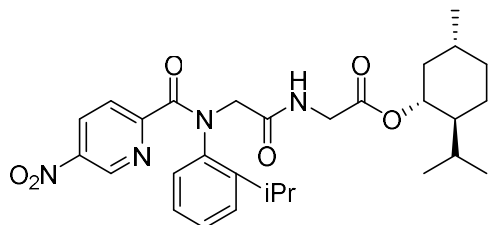

The title compound ***rac-4d*** was prepared according to the general procedure B and purified by flash chromatography (petroleum ether: ethyl acetate: triethylamine = 1: 1: 1%). ***rac-4d*** was obtained as a light yellow solid, *E*: *Z* = 11: 1.

**<sup>1</sup>H NMR (400 MHz, CDCl<sub>3</sub>)** δ 9.01 (d, *J* = 2.4 Hz, 1H), 8.39 (dd, *J* = 8.6, 2.4 Hz, 1H), 7.84 (d, *J* = 8.6 Hz, 1H), 7.24-7.17 (m, 3H), 7.00-6.95 (m, 2H), 5.00 (dd, *J* = 15.0, 8.9 Hz, 1H), 4.78 (tdd, *J* = 10.9, 4.5, 2.1 Hz, 1H), 4.21-4.12 (m, 1H), 4.05-3.99 (m, 1H), 3.95-3.88 (m, 1H), 3.22-3.15 (m, 1H), 2.02-1.97 (m, 1H), 1.86-1.79 (m, 1H), 1.71-1.65 (m, 2H), 1.53-1.45 (m, 1H), 1.43-1.36 (m, 1H), 1.21 (dd, *J* = 6.9, 1.8 Hz, 3H), 1.14 (dd, *J* = 6.7, 3.3 Hz, 3H), 1.07-1.00 (m, 2H), 0.92-0.87 (m, 7H), 0.76 (dd, *J* = 6.9, 1.5 Hz, 3H); **<sup>13</sup>C NMR (101 MHz, CDCl<sub>3</sub>)** δ 169.47, 167.85, 167.71, 158.05, 145.91, 143.59, 143.41, 139.47, 131.52, 129.24, 129.21, 127.10, 126.55, 124.40, 75.85, 54.75, 46.90, 41.48, 40.78, 34.09, 31.41, 28.07, 26.26, 24.71, 23.37, 23.07, 22.01, 20.74, 16.33; **HRMS (ESI-TOF)** calcd for [C<sub>29</sub>H<sub>38</sub>N<sub>4</sub>O<sub>6</sub>+Na<sup>+</sup>]: 561.2683, found: 561.2685.

**(3*S*)-10,13-dimethyl-17-oxo-2,3,4,7,8,9,10,11,12,13,14,15,16,17-tetradecahydro-1*H*-cyclopenta[*a*]phenanthren-3-yl *N*-(2-isopropylphenyl)-*N*-(5-nitropicolinoyl)glycyglycinate (*rac-4e*)**



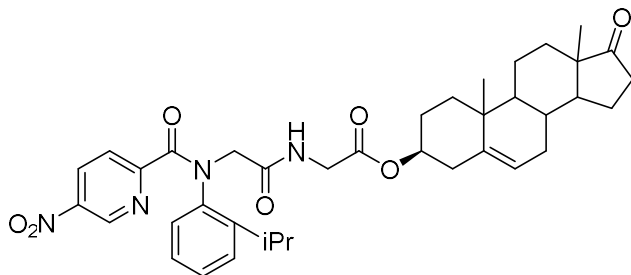

The title compound **rac-4e** was prepared according to the general procedure B and purified by flash chromatography (petroleum ether: ethyl acetate: triethylamine = 1: 1: 1%). **rac-4e** was obtained as a light yellow powder, *E*: *Z* = 11: 1.

**<sup>1</sup>H NMR (400 MHz, CDCl<sub>3</sub>)** δ 9.01 (d, *J* = 2.5 Hz, 1H), 8.39 (dd, *J* = 8.6, 2.5 Hz, 1H), 7.83 (d, *J* = 8.6 Hz, 1H), 7.23-7.16 (m, 3H), 7.01-6.95 (m, 2H), 5.41 (d, *J* = 4.1 Hz, 1H), 4.99 (d, *J* = 15.0 Hz, 1H), 4.74-4.66 (m, 1H), 4.16 (dd, *J* = 18.3, 6.6 Hz, 1H), 3.99 (ddd, *J* = 18.2, 4.9, 1.8 Hz, 1H), 3.91 (d, *J* = 15.0 Hz, 1H), 3.21-3.14 (m, 1H), 2.48-2.35 (m, 3H), 2.12-2.02 (m, 2H), 1.97-1.85 (m, 4H), 1.71-1.43 (m, 7H), 1.32-1.24 (m, 3H), 1.20 (d, *J* = 6.9 Hz, 3H), 1.14 (d, *J* = 6.8 Hz, 3H), 1.04 (s, 3H), 0.88 (s, 3H); **<sup>13</sup>C NMR (101 MHz, CDCl<sub>3</sub>)** δ 169.20, 167.83, 167.79, 158.04, 145.90, 143.61, 143.41, 139.59, 139.48, 131.48, 129.25, 129.20, 127.08, 126.53, 124.35, 122.25, 75.23, 54.75, 51.70, 50.14, 47.52, 41.56, 37.98, 36.86, 36.72, 35.83, 31.45, 31.41, 30.78, 28.06, 27.64, 24.71, 23.04, 21.88, 20.34, 19.33, 13.56. **HRMS (ESI-TOF)** calcd for [C<sub>38</sub>H<sub>46</sub>N<sub>4</sub>O<sub>7</sub>+Na<sup>+</sup>]: 693.3258, found: 693.3259.

**Methyl *N*-(2-isopropylphenyl)-*N*-(5-nitropicolinoyl)glycylglycyl-*L*-valinate (*rac*-4f)**

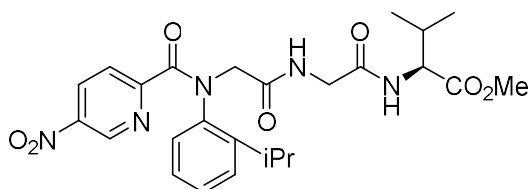

The title compound **rac-4f** was prepared according to the general procedure B and purified by flash chromatography (petroleum ether: ethyl acetate: triethylamine = 1: 1: 1%). **rac-4f** was obtained as a yellow solid, *E*: *Z* = 13: 1.

**<sup>1</sup>H NMR (400 MHz, CDCl<sub>3</sub>)** δ 9.00 (t, *J* = 2.4 Hz, 1H), 8.39 (dt, *J* = 8.6, 2.9 Hz, 1H), 7.85 (dd, *J* = 23.0, 8.6 Hz, 1H), 7.26-7.16 (m, 4H), 7.00-6.94 (m, 1H), 6.88-6.81 (m, 1H), 4.93 (dd, *J* = 15.2, 7.0 Hz, 1H), 4.55-4.51 (m, 1H), 4.22-3.88 (m, 3H), 3.72 (d, *J* = 3.3 Hz, 3H), 3.25-3.15 (m, 1H), 2.21-2.11 (m, 1H), 1.20 (dd, *J* = 6.9, 3.1 Hz, 3H), 1.15 (dd, *J* = 6.7, 2.7 Hz, 3H), 0.94-0.89 (m, 6H); **<sup>13</sup>C NMR (101 MHz, CDCl<sub>3</sub>)** δ 172.35, 168.81, 168.20, 167.78, 157.95, 145.96, 143.64, 143.38, 139.80, 131.52, 129.22, 129.19, 127.11, 126.53, 124.50, 57.47, 54.89, 52.20, 43.15, 31.04, 28.11, 24.66, 23.05, 18.98, 17.96; **HRMS (ESI-TOF)** calcd for [C<sub>25</sub>H<sub>31</sub>N<sub>5</sub>O<sub>7</sub>+Na<sup>+</sup>]: 536.2115, found: 536.2116.

**Methyl *N*-(2-isopropylphenyl)-*N*-(5-nitropicolinoyl)glycylglycyl-*L*-phenylalaninate (*rac*-4g)**

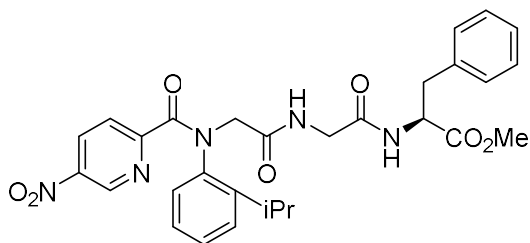

The title compound **rac-4g** was prepared according to the general procedure B and purified by flash chromatography (petroleum ether: ethyl acetate: triethylamine = 1: 1: 1%). **rac-4g** was obtained as a white solid, *E: Z* = 12: 1.

**<sup>1</sup>H NMR (400 MHz, CDCl<sub>3</sub>)** δ 8.99 (d, *J* = 2.4 Hz, 1H), 8.38-8.33 (m, 1H), 7.78 (dd, *J* = 30.2, 8.6 Hz, 1H), 7.25-7.16 (m, 7H), 7.12-7.08 (m, 2H), 7.00 – 6.89 (m, 2H), 4.93-4.81 (m, 2H), 4.12-3.85 (m, 3H), 3.68 (s, 3H), 3.26-3.14 (m, 1H), 3.12-3.03 (m, 2H), 1.20 (dd, *J* = 6.9, 4.1 Hz, 3H), 1.15 (t, *J* = 6.6 Hz, 3H); **<sup>13</sup>C NMR (101 MHz, CDCl<sub>3</sub>)** δ 171.97, 168.56, 168.11, 167.77, 157.91, 145.96, 143.60, 143.41, 139.79, 135.93, 131.56, 129.28, 129.22, 129.18, 128.60, 127.14, 127.10, 126.56, 124.49, 54.85, 53.56, 52.43, 42.95, 37.75, 28.10, 24.71, 23.08; **HRMS (ESI-TOF)** calcd for [C<sub>29</sub>H<sub>31</sub>N<sub>5</sub>O<sub>7</sub>+Na<sup>+</sup>]: 584.2115, found: 584.2117.

**Methyl N-(5-nitrophenyl)-N-(o-tolyl)glycylglycinate (rac-4h)**

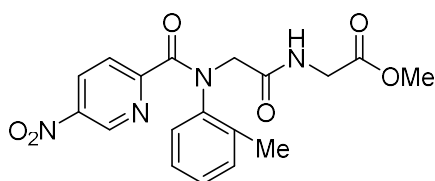

The title compound **rac-4h** was prepared according to the general procedure A and purified by flash chromatography (petroleum ether: ethyl acetate: triethylamine = 1: 1: 1%). **rac-4h** was obtained as a brown solid, *E: Z* = 11: 1.

**<sup>1</sup>H NMR (400 MHz, CDCl<sub>3</sub>)** δ 9.04 (dd, *J* = 2.6, 0.7 Hz, 1H), 8.38 (dd, *J* = 8.6, 2.7 Hz, 1H), 7.78 (dd, *J* = 8.6, 0.8 Hz, 1H), 7.18 (d, *J* = 7.7 Hz, 1H), 7.13-7.07 (m, 3H), 7.01-6.97 (m, 1H), 4.96 (d, *J* = 15.0 Hz, 1H), 4.19 (dd, *J* = 18.2, 5.9 Hz, 1H), 4.02 (dd, *J* = 18.3, 5.0 Hz, 1H), 3.94 (d, *J* = 15.0 Hz, 1H), 3.76 (s, 3H), 2.31 (s, 3H); **<sup>13</sup>C NMR (101 MHz, CDCl<sub>3</sub>)** δ 170.28, 167.99, 167.80, 158.10, 143.67, 143.65, 140.76, 135.61, 131.50, 131.19, 129.17, 128.81, 126.92, 123.93, 53.50, 52.46, 41.17, 18.03; **HRMS (ESI-TOF)** calcd for [C<sub>18</sub>H<sub>18</sub>N<sub>4</sub>O<sub>6</sub>+Na<sup>+</sup>]: 409.1118, found: 409.1119.

**Methyl N-(4-iodo-2-methylphenyl)-N-(5-nitrophenyl)glycylglycinate (rac-4i)**

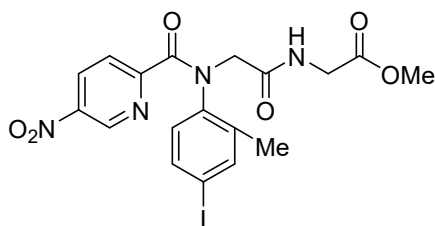

The title compound **rac-4i** was prepared according to the general procedure A and purified by flash chromatography (petroleum ether: ethyl acetate: triethylamine = 1: 1: 1%). **rac-4i** was obtained as a light yellow solid, *E: Z* = 11: 1.

**<sup>1</sup>H NMR (400 MHz, CDCl<sub>3</sub>)** δ 9.06 (d, *J* = 2.5 Hz, 1H), 8.45 (dd, *J* = 8.6, 2.6 Hz, 1H), 7.87 (d, *J* = 8.5 Hz, 1H), 7.52 (d, *J* = 2.0 Hz, 1H), 7.33 (dd, *J* = 8.3, 2.1 Hz, 1H), 6.92 (d, *J* = 8.2 Hz, 2H), 4.94 (d, *J* = 14.9 Hz, 1H), 4.20 (dd, *J* = 18.3, 5.9 Hz, 1H), 4.01 (dd, *J* = 18.2, 4.9 Hz, 1H), 3.86 (d, *J* = 14.8 Hz, 1H), 3.78 (s, 3H), 2.29 (s, 3H); **<sup>13</sup>C NMR (101 MHz, CDCl<sub>3</sub>)** δ 170.26, 167.72, 167.45, 157.57, 143.87, 143.69, 140.86, 140.02, 138.12, 136.10, 131.77, 130.90, 124.28, 94.46, 53.35, 52.51, 41.16, 17.75; **HRMS (ESI-TOF)** calcd for [C<sub>18</sub>H<sub>17</sub>IN<sub>4</sub>O<sub>6</sub>+Na<sup>+</sup>]: 535.0085, found: 535.0084.

**Methyl *N*-(4-methoxy-2-methylphenyl)-*N*-(5-nitropicolinoyl)glycylglycinate (*rac*-4j)**

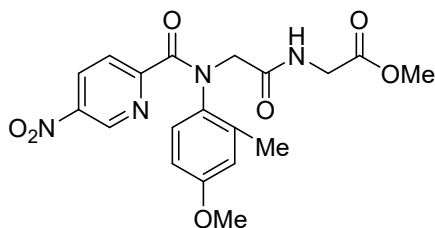

The title compound ***rac*-4j** was prepared according to the general procedure A and purified by flash chromatography (petroleum ether: ethyl acetate: triethylamine = 1: 1: 1%). ***rac*-4j** was obtained as a yellow solid, *E*: *Z* = 14: 1.

**<sup>1</sup>H NMR (400 MHz, CDCl<sub>3</sub>)** δ 9.08 (d, *J* = 2.9 Hz, 1H), 8.37 (dd, *J* = 8.6, 2.6 Hz, 1H), 7.71 (d, *J* = 8.1 Hz, 1H), 7.10 (d, *J* = 8.6 Hz, 2H), 6.60 (d, *J* = 2.8 Hz, 1H), 6.48 (dd, *J* = 8.6, 2.9 Hz, 1H), 4.95 (d, *J* = 14.9 Hz, 1H), 4.19 (dd, *J* = 18.2, 6.0 Hz, 1H), 4.00 (dd, *J* = 18.2, 5.0 Hz, 1H), 3.87 (d, *J* = 14.9 Hz, 1H), 3.76 (s, 3H), 3.68 (s, 3H), 2.27 (s, 3H); **<sup>13</sup>C NMR (101 MHz, CDCl<sub>3</sub>)** δ 170.30, 168.15, 168.11, 159.29, 158.55, 143.80, 143.54, 137.10, 133.52, 131.46, 130.35, 123.63, 116.18, 111.71, 55.23, 53.51, 52.38, 41.13, 18.27; **HRMS (ESI-TOF)** calcd for [C<sub>19</sub>H<sub>20</sub>N<sub>4</sub>O<sub>7</sub>+Na<sup>+</sup>]: 439.1224, found: 439.1225.

**Methyl *N*-(4-hydroxy-2-methylphenyl)-*N*-(5-nitropicolinoyl)glycylglycinate (*rac*-4k)**

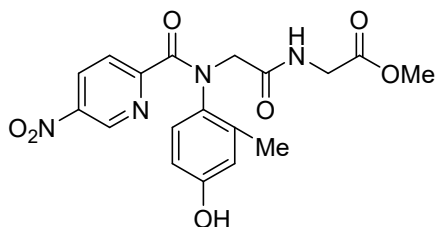

The title compound ***rac*-4k** was prepared according to the general procedure A and purified by flash chromatography (petroleum ether: ethyl acetate: triethylamine = 1: 1: 1%). ***rac*-4k** was obtained as a yellow powder, *E*: *Z* = 13: 1.

**<sup>1</sup>H NMR (400 MHz, CDCl<sub>3</sub>)** δ 9.09 (d, *J* = 2.5 Hz, 1H), 8.35 (dd, *J* = 8.6, 2.6 Hz, 1H), 7.65 (d, *J* = 8.6 Hz, 1H), 7.53 (s, 1H), 7.46 (t, *J* = 5.8 Hz, 1H), 6.83 (d, *J* = 8.5 Hz, 1H), 6.38 (d, *J* = 2.7 Hz, 1H), 6.18 (dd, *J* = 8.5, 2.8 Hz, 1H), 4.96 (d, *J* = 14.4 Hz, 1H), 4.22 (dd, *J* = 18.2, 6.4 Hz, 1H), 3.98 (dd, *J* = 18.1, 5.0 Hz, 1H), 3.92 (d, *J* = 14.4 Hz, 1H), 3.77 (s, 3H), 2.17 (s, 3H); **<sup>13</sup>C NMR (101 MHz, CDCl<sub>3</sub>)** δ 170.11, 169.41, 168.52, 158.21, 156.62, 143.92, 143.60, 136.70, 132.10, 131.49, 130.06, 123.61, 117.61, 113.55, 53.50, 52.57, 41.22, 17.95; **HRMS (ESI-TOF)** calcd for [C<sub>18</sub>H<sub>18</sub>N<sub>4</sub>O<sub>7</sub>+H<sup>+</sup>]: 403.1248, found: 403.1249.

**Methyl 6-((2-((2-methoxy-2-oxoethyl)amino)-2-oxoethyl) (5,6,7,8-tetrahydronaphthalen-1-yl)carbonyl)nicotinate (*rac*-4l)**

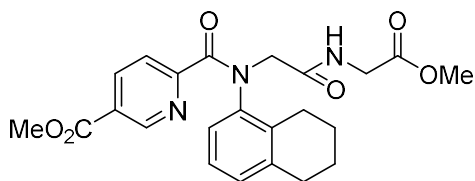

The title compound **rac-4l** was prepared according to the general procedure A and purified by flash chromatography (ethyl acetate: dichloromethane: triethylamine = 1: 1: 1%). **rac-4l** was obtained as a light yellow powder, *E: Z* = 7: 1.

**<sup>1</sup>H NMR (400 MHz, CDCl<sub>3</sub>)** δ 8.85 (s, 1H), 8.16 (dd, *J* = 8.2, 2.1 Hz, 1H), 7.57 (d, *J* = 8.1 Hz, 1H), 7.25 (t, *J* = 5.0 Hz, 1H), 6.97 (dd, *J* = 6.9, 1.7 Hz, 1H), 6.90-6.84 (m, 2H), 4.93 (d, *J* = 14.9 Hz, 1H), 4.20 (dd, *J* = 18.2, 6.0 Hz, 1H), 4.00 (dd, *J* = 18.1, 5.0 Hz, 1H), 3.88 (d, *J* = 14.8 Hz, 1H), 3.88 (s, 3H), 3.76 (s, 3H), 2.88-2.52 (m, 4H), 1.84-1.68 (m, 4H); **<sup>13</sup>C NMR (101 MHz, CDCl<sub>3</sub>)** δ 170.25, 169.09, 168.53, 165.10, 156.66, 149.50, 140.75, 139.00, 137.24, 134.83, 129.51, 126.41, 126.00, 125.80, 122.89, 53.56, 52.49, 52.35, 41.15, 29.38, 25.32, 22.64; **HRMS (ESI-TOF)** calcd for [C<sub>23</sub>H<sub>25</sub>N<sub>3</sub>O<sub>6</sub>+Na<sup>+</sup>]: 462.1635, found: 462.1637.

**Methyl 6-((2-ethylphenyl)(2-((2-methoxy-2-oxoethyl)amino)-2-oxoethyl)carbamoyl)nicotinate (rac-4m)**

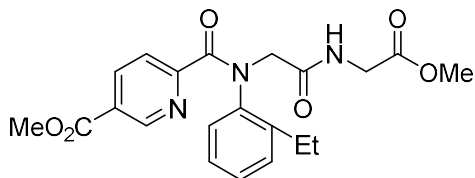

The title compound **rac-4m** was prepared according to the general procedure A and purified by flash chromatography (petroleum ether: ethyl acetate: triethylamine = 1: 1: 1%). **rac-4m** was obtained as a light yellow solid, *E: Z* = 7: 1.

**<sup>1</sup>H NMR (400 MHz, CDCl<sub>3</sub>)** δ 8.84 (d, *J* = 1.3 Hz, 1H), 8.16 (dd, *J* = 8.1, 2.0 Hz, 1H), 7.60 (dd, *J* = 8.2, 0.9 Hz, 1H), 7.22-7.19 (m, 2H), 7.16-7.11 (m, 2H), 7.01-6.97 (m, 1H), 4.96 (d, *J* = 14.9 Hz, 1H), 4.19 (dd, *J* = 18.2, 6.0 Hz, 1H), 4.02 (dd, *J* = 18.1, 5.0 Hz, 1H), 3.92 (d, *J* = 14.7 Hz, 1H), 3.87 (s, 3H), 3.76 (s, 3H), 2.63 (q, *J* = 7.5 Hz, 2H), 1.20 (t, *J* = 7.5 Hz, 3H); **<sup>13</sup>C NMR (101 MHz, CDCl<sub>3</sub>)** δ 170.22, 169.07, 168.39, 165.05, 156.47, 149.42, 140.84, 140.64, 137.27, 129.13, 128.82, 128.69, 126.58, 126.03, 123.12, 54.36, 52.49, 52.39, 41.17, 23.45, 13.83. **HRMS (ESI-TOF)** calcd for [C<sub>21</sub>H<sub>23</sub>N<sub>3</sub>O<sub>6</sub>+Na<sup>+</sup>]: 436.1479, found: 436.1479.

**Methyl 6-((2-bromo-4-methoxyphenyl)(2-((2-methoxy-2-oxoethyl)amino)-2-oxoethyl)carbamoyl)nicotinate (rac-4n)**

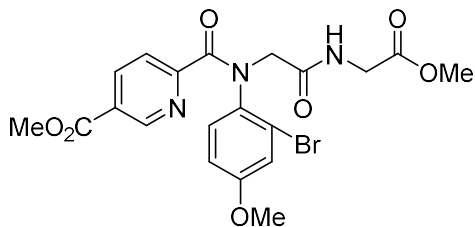

The title compound **rac-4n** was prepared according to the general procedure A and purified by flash chromatography (ethyl acetate: dichloromethane: triethylamine = 1: 1: 1%). **rac-4n** was obtained as a

brown solid, *E*: *Z* = 8: 1.

**<sup>1</sup>H NMR (400 MHz, CDCl<sub>3</sub>)** δ 8.87 (dd, *J* = 2.2, 0.9 Hz, 1H), 8.19 (dd, *J* = 8.2, 2.2 Hz, 1H), 7.68 (dd, *J* = 8.2, 0.9 Hz, 1H), 7.36 (d, *J* = 8.8 Hz, 1H), 7.15 (t, *J* = 5.6 Hz, 1H), 6.95 (d, *J* = 2.8 Hz, 1H), 6.65 (dd, *J* = 8.8, 2.8 Hz, 1H), 5.02 (d, *J* = 15.4 Hz, 1H), 4.16 (dd, *J* = 18.2, 6.0 Hz, 1H), 3.98 (dd, *J* = 18.1, 5.1 Hz, 1H), 3.89 (d, *J* = 15.9 Hz, 1H), 3.87 (s, 3H), 3.73 (s, 3H), 3.69 (s, 3H); **<sup>13</sup>C NMR (101 MHz, CDCl<sub>3</sub>)** δ 170.19, 168.77, 168.24, 165.06, 159.54, 156.31, 149.39, 137.41, 133.97, 132.05, 126.15, 123.08, 123.02, 118.13, 113.80, 55.63, 53.41, 52.52, 52.36, 41.17; **HRMS (ESI-TOF)** calcd for [C<sub>20</sub>H<sub>20</sub>BrN<sub>3</sub>O<sub>7</sub>+Na<sup>+</sup>]: 516.0377, found: 516.0379.

**Methyl 6-((2-iodo-4-methoxyphenyl)(2-((2-methoxy-2-oxoethyl)amino)-2-oxoethyl)carbamoyl)nicotinate (*rac*-4o)**

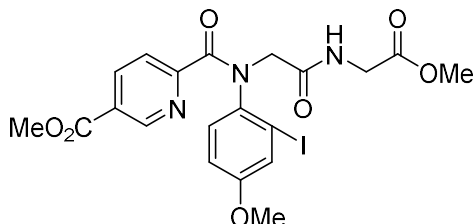

The title compound ***rac*-4o** was prepared according to the general procedure A and purified by flash chromatography (ethyl acetate: dichloromethane: triethylamine =1: 1: 1%). ***rac*-4o** was obtained as a reddish brown solid, *E*: *Z* = 7: 1.

**<sup>1</sup>H NMR (400 MHz, CDCl<sub>3</sub>)** δ 8.89 (d, *J* = 1.4 Hz, 1H), 8.22 (dd, *J* = 8.2, 2.1 Hz, 1H), 7.75 (d, *J* = 7.8 Hz, 1H), 7.37 (d, *J* = 8.8 Hz, 1H), 7.21 (d, *J* = 2.8 Hz, 1H), 7.05 (t, *J* = 5.6 Hz, 1H), 6.71 (dd, *J* = 8.8, 2.8 Hz, 1H), 5.08 (d, *J* = 15.2 Hz, 1H), 4.21 (dd, *J* = 18.2, 6.0 Hz, 1H), 4.00 (dd, *J* = 18.2, 5.0 Hz, 1H), 3.89 (s, 3H), 3.81 (d, *J* = 15.2 Hz, 1H), 3.76 (s, 3H), 3.71 (s, 3H). **<sup>13</sup>C NMR (101 MHz, CDCl<sub>3</sub>)** δ 170.18, 168.64, 168.16, 165.11, 159.19, 156.30, 149.34, 137.37, 131.54, 126.13, 124.38, 123.25, 114.56, 99.61, 55.61, 53.84, 52.53, 52.41, 41.20. **HRMS (ESI-TOF)** calcd for [C<sub>20</sub>H<sub>20</sub>IN<sub>3</sub>O<sub>7</sub>+Na<sup>+</sup>]: 564.0238, found: 564.0240.

**Methyl 6-((2-(2-hydroxyethyl)phenyl)(2-((2-methoxy-2-oxoethyl)amino)-2-oxoethyl)carbamoyl)nicotinate (*rac*-4p)**

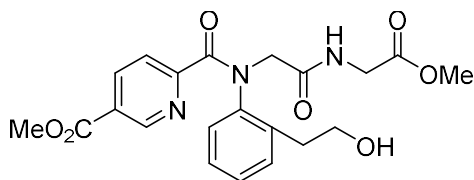

The title compound ***rac*-4p** was prepared according to the general procedure A and purified by flash chromatography (ethyl acetate: dichloromethane: triethylamine =1: 1: 1%). ***rac*-4p** was obtained as a yellow oil, *E*: *Z* = 17: 1.

**<sup>1</sup>H NMR (400 MHz, CDCl<sub>3</sub>)** δ 8.69 (d, *J* = 1.4 Hz, 1H), 8.32 (dd, *J* = 8.1, 2.0 Hz, 1H), 8.07 (t, *J* = 5.7 Hz, 1H), 7.89 (d, *J* = 8.2 Hz, 1H), 7.24 (dd, *J* = 7.7, 1.6 Hz, 1H), 7.13 (td, *J* = 7.5, 1.4 Hz, 1H), 6.88 (td, *J* = 7.8, 1.6 Hz, 1H), 6.78 (dd, *J* = 7.9, 1.4 Hz, 1H), 5.37 (dd, *J* = 9.1, 3.9 Hz, 1H), 4.55 (d, *J* = 15.8 Hz, 1H), 4.34 (d, *J* = 15.8 Hz, 1H), 4.19 (dd, *J* = 18.0, 6.1 Hz, 1H), 4.07-3.93 (m, 3H), 3.87 (s, 3H), 3.72 (s, 3H), 3.26-3.19 (m, 1H), 2.85-2.79 (m, 1H); **<sup>13</sup>C NMR (101 MHz, CDCl<sub>3</sub>)** δ 170.40, 168.87, 168.26, 164.52, 156.11, 148.34, 142.16, 138.62, 137.23, 131.59, 129.54, 128.63, 127.26, 126.59, 124.69, 63.94,

54.67, 52.65, 52.25, 41.06, 35.45. **HRMS (ESI-TOF)** calcd for  $[C_{21}H_{23}N_3O_7+Na^+]$ : 452.1428, found: 452.1428.

#### ***N*-(4-fluorobenzyl)-2-isopropylaniline (4qq)**

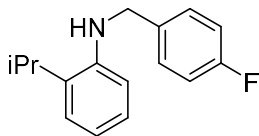

The title compound **4qq** was prepared according to the general procedure C and purified by flash chromatography (petroleum ether: ethyl acetate = 9: 1). **4qq** was obtained as a light yellow oil.

**<sup>1</sup>H NMR (400 MHz, CDCl<sub>3</sub>)** δ 7.42-7.37 (m, 2H), 7.23 (dd, *J* = 7.6, 1.6 Hz, 1H), 7.14 (td, *J* = 7.6, 1.6 Hz, 1H), 7.12-7.06 (m, 2H), 6.82 (t, *J* = 7.5 Hz, 1H), 6.66 (d, *J* = 8.0 Hz, 1H), 4.39 (s, 2H), 4.08 (s, 1H), 2.99-2.89 (m, 1H), 1.33 (d, *J* = 6.8 Hz, 6H); **<sup>13</sup>C NMR (101 MHz, CDCl<sub>3</sub>)** δ 162.13 (d, *J*<sub>CF</sub> = 246.4 Hz), 144.62, 135.40 (d, *J*<sub>CF</sub> = 3.0 Hz), 132.29, 129.08 (d, *J*<sub>CF</sub> = 8.1 Hz), 126.81, 125.04, 117.79, 115.55 (d, *J*<sub>CF</sub> = 21.2 Hz), 110.79, 47.88, 27.33, 22.37; **<sup>19</sup>F NMR (376 MHz, CDCl<sub>3</sub>)** δ -115.54; **HRMS (ESI-TOF)** calcd for  $[C_{16}H_{18}FN+H^+]$ : 244.1496, found: 244.1495.

#### **Methyl 6-((4-fluorobenzyl)(2-isopropylphenyl)carbamoyl)nicotinate (*rac*-4q)**

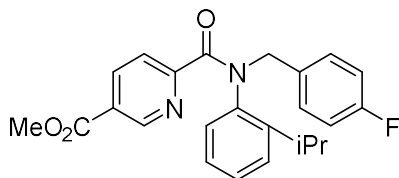

The title compound ***rac*-4q** was prepared according to the general procedure C and purified by flash chromatography (petroleum ether: ethyl acetate = 1: 1). ***rac*-4q** was obtained as a light yellow solid, *E*: *Z* = 14: 1.

**<sup>1</sup>H NMR (400 MHz, CDCl<sub>3</sub>)** δ 8.83 (d, *J* = 1.3 Hz, 1H), 8.13 (dd, *J* = 8.1, 2.1 Hz, 1H), 7.53 (d, *J* = 8.1 Hz, 1H), 7.29-7.26 (m, 2H), 7.14-7.12 (m, 2H), 6.94 (t, *J* = 8.7 Hz, 2H), 6.90-6.86 (m, 1H), 6.65 (d, *J* = 7.8 Hz, 1H), 5.48 (d, *J* = 13.9 Hz, 1H), 4.49 (d, *J* = 14.0 Hz, 1H), 3.85 (s, 3H), 3.10-3.03 (m, 1H), 0.99 (d, *J* = 6.8 Hz, 3H), 0.94 (d, *J* = 6.8 Hz, 3H); **<sup>13</sup>C NMR (101 MHz, CDCl<sub>3</sub>)** δ 167.97, 165.07, 162.39 (d, *J*<sub>CF</sub> = 246.4 Hz), 157.22, 149.29, 146.13, 138.73, 137.11, 132.52 (d, *J*<sub>CF</sub> = 3.0 Hz), 131.34 (d, *J*<sub>CF</sub> = 8.1 Hz), 129.85, 128.50, 126.96, 125.80, 125.73, 123.22, 115.29 (d, *J*<sub>CF</sub> = 21.2 Hz), 53.23, 52.42, 27.78, 24.63, 23.12; **<sup>19</sup>F NMR (376 MHz, CDCl<sub>3</sub>)** δ -114.53; **HRMS (ESI-TOF)** calcd for  $[C_{24}H_{23}FN_2O_3+Na^+]$ : 429.1585, found: 429.1587.

#### **2-isopropyl-*N*-(4-methoxybenzyl)aniline (4rr)**

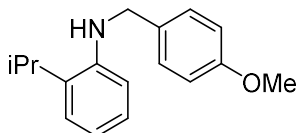

The title compound **4rr** was prepared according to the general procedure C and purified by flash chromatography (petroleum ether: ethyl acetate = 9: 1). **4rr** was obtained as a brown oil.

**<sup>1</sup>H NMR (400 MHz, CDCl<sub>3</sub>)** δ 7.32 (d, *J* = 8.5 Hz, 2H), 7.18 (d, *J* = 7.6 Hz, 1H), 7.11 (t, *J* = 7.4 Hz, 1H), 6.91 (d, *J* = 8.5 Hz, 2H), 6.77 (t, *J* = 7.4 Hz, 1H), 6.68 (d, *J* = 8.6 Hz, 1H), 4.31 (s, 2H), 3.82 (s,

3H), 3.22 (s, 1H), 2.94-2.83 (m, 1H), 1.27 (d,  $J = 6.8$  Hz, 6H);  $^{13}\text{C}$  NMR (101 MHz,  $\text{CDCl}_3$ )  $\delta$  158.91, 144.77, 132.21, 131.54, 128.89, 126.76, 124.91, 117.55, 114.09, 110.75, 55.32, 48.10, 27.23, 22.33; **HRMS** (EI-TOF) calcd for  $[\text{C}_{17}\text{H}_{21}\text{NO}]^+$ : 255.1623, found: 255.1624.

**Methyl 6-((2-isopropylphenyl)(4-methoxybenzyl)carbamoyl)nicotinate (*rac*-4r)**

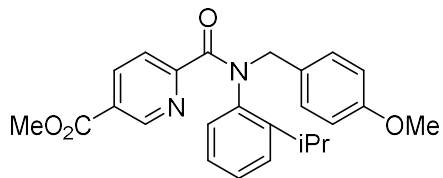

The title compound *rac*-4r was prepared according to the general procedure C and purified by flash chromatography (petroleum ether: ethyl acetate = 1: 1). *rac*-4r was obtained as a light brown solid, *E*: *Z* = 13: 1.

$^1\text{H}$  NMR (400 MHz,  $\text{CDCl}_3$ )  $\delta$  8.84 (dd,  $J = 2.2, 0.9$  Hz, 1H), 8.12 (dd,  $J = 8.2, 2.1$  Hz, 1H), 7.51 (dd,  $J = 8.1, 0.9$  Hz, 1H), 7.23-7.20 (m, 2H), 7.14-7.09 (m, 2H), 6.89-6.85 (m, 1H), 6.81-6.77 (m, 2H), 6.66 (d,  $J = 7.6$  Hz, 1H), 5.49 (d,  $J = 13.8$  Hz, 1H), 4.44 (d,  $J = 13.9$  Hz, 1H), 3.86 (s, 3H), 3.76 (s, 3H), 3.12-3.04 (m, 1H), 1.00 (d,  $J = 6.8$  Hz, 3H), 0.94 (d,  $J = 6.8$  Hz, 3H);  $^{13}\text{C}$  NMR (101 MHz,  $\text{CDCl}_3$ )  $\delta$  167.88, 165.16, 159.17, 157.51, 149.31, 146.19, 138.81, 137.04, 130.91, 130.04, 128.86, 128.37, 126.84, 125.69, 125.59, 123.17, 113.78, 55.23, 53.32, 52.42, 27.76, 24.68, 23.13; **HRMS** (EI-TOF) calcd for  $[\text{C}_{25}\text{H}_{26}\text{N}_2\text{O}_4]^+$ : 418.1893, found: 418.1895.

**2-isopropyl-*N*-(4-nitrobenzyl)aniline (4ss)**

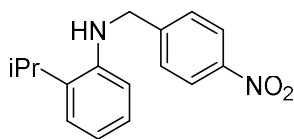

The title compound 4ss was prepared according to the general procedure C and purified by flash chromatography (petroleum ether: ethyl acetate = 9: 1). 4ss was obtained as a yellow solid.

$^1\text{H}$  NMR (400 MHz,  $\text{CDCl}_3$ )  $\delta$  8.20 (d,  $J = 8.6$  Hz, 2H), 7.54 (d,  $J = 8.6$  Hz, 2H), 7.20 (dd,  $J = 7.6, 1.6$  Hz, 1H), 7.04 (td,  $J = 7.6, 1.6$  Hz, 1H), 6.79 (t,  $J = 7.3$  Hz, 1H), 6.45 (d,  $J = 8.0$  Hz, 1H), 4.53 (s, 2H), 4.29 (s, 1H), 3.00-2.90 (m, 1H), 1.32 (d,  $J = 6.8$  Hz, 6H);  $^{13}\text{C}$  NMR (101 MHz,  $\text{CDCl}_3$ )  $\delta$  147.66, 147.23, 143.88, 132.43, 127.73, 126.77, 125.22, 123.95, 118.25, 110.76, 47.81, 27.39, 22.36; **HRMS** (EI-TOF) calcd for  $[\text{C}_{16}\text{H}_{18}\text{N}_2\text{O}_2]^+$ : 270.1368, found: 270.1370.

**Methyl 6-((2-isopropylphenyl)(4-nitrobenzyl)carbamoyl)nicotinate (*rac*-4s)**

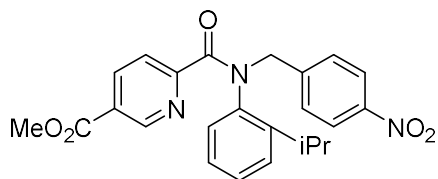

The title compound *rac*-4s was prepared according to the general procedure C and purified by flash chromatography (petroleum ether: ethyl acetate = 1: 1). *rac*-4s was obtained as a light yellow solid, *E*: *Z* = 20: 1.

$^1\text{H NMR}$  (400 MHz,  $\text{CDCl}_3$ )  $\delta$  8.84 (s, 1H), 8.19-8.15 (m, 3H), 7.59-7.51 (m, 3H), 7.20-7.14 (m, 2H), 6.95-6.87 (m, 1H), 6.65 (d,  $J = 7.8$  Hz, 1H), 5.63 (d,  $J = 14.3$  Hz, 1H), 4.56 (d,  $J = 14.3$  Hz, 1H), 3.88 (s, 3H), 3.13-3.06 (m, 1H), 1.05 (d,  $J = 6.8$  Hz, 3H), 0.99 (d,  $J = 6.8$  Hz, 3H);  $^{13}\text{C NMR}$  (101 MHz,  $\text{CDCl}_3$ )  $\delta$  168.30, 165.05, 156.65, 149.31, 147.51, 145.97, 143.96, 138.79, 137.31, 130.25, 129.50, 128.82, 127.23, 126.07, 125.99, 123.76, 123.34, 53.56, 52.55, 27.90, 24.74, 23.15; **HRMS** (EI-TOF) calcd for  $[\text{C}_{24}\text{H}_{23}\text{N}_3\text{O}_5]^+$ : 433.1638, found: 433.1637.

**5-nitro-*N,N*-di-*o*-tolylpicolinamide (*rac*-4t)**

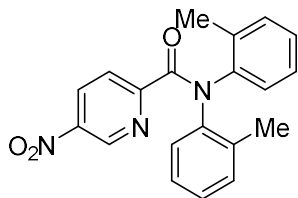

The title compound *rac*-4t was prepared according to the general procedure D and was purified by flash chromatography (petroleum ether: ethyl acetate: triethylamine = 4: 1: 1%). *rac*-4t was obtained as a light yellow solid, *E*: *Z* > 99: 1.

$^1\text{H NMR}$  (400 MHz,  $\text{CDCl}_3$ )  $\delta$  9.08 (d,  $J = 2.3$  Hz, 1H), 8.44 (dd,  $J = 8.5, 2.4$  Hz, 1H), 7.93 (d,  $J = 8.5$  Hz, 1H), 7.35 (d,  $J = 7.5$  Hz, 1H), 7.21 (t,  $J = 7.2$  Hz, 1H), 7.16-7.08 (m, 3H), 7.01 (s, 2H), 6.90 (d,  $J = 7.8$  Hz, 1H), 2.49 (s, 3H), 2.17 (s, 3H);  $^{13}\text{C NMR}$  (101 MHz,  $\text{CDCl}_3$ )  $\delta$  166.37, 159.38, 143.81, 143.69, 142.01, 135.12, 131.77, 131.70, 131.27, 129.68, 128.01, 127.23, 126.74, 126.57, 125.99, 124.45, 18.83, 18.38; **HRMS** (ESI-TOF) calcd for  $[\text{C}_{20}\text{H}_{17}\text{N}_3\text{O}_3+\text{Na}^+]$ : 370.1162, found: 370.1164.

**Methyl 6-((2-((2-methoxy-2-oxoethyl)amino)-2-oxoethyl)(quinolin-8-yl)carbamoyl)nicotinate (*rac*-4u)**

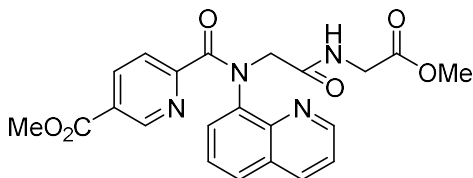

The title compound *rac*-4u was prepared according to the general procedure A and was purified by flash chromatography (ethyl acetate: triethylamine = 1: 1%). *rac*-4u was obtained as a brown solid, *E*: *Z* > 99: 1.

$^1\text{H NMR}$  (400 MHz,  $\text{CDCl}_3$ )  $\delta$  9.50 (s, 1H), 8.81 (dd,  $J = 4.3, 1.7$  Hz, 1H), 8.51 (s, 1H), 8.09 (dd,  $J = 8.3, 1.6$  Hz, 1H), 8.04 (d,  $J = 7.8$  Hz, 1H), 7.77 (d,  $J = 8.2$  Hz, 1H), 7.70 (t,  $J = 6.7$  Hz, 2H), 7.49 (t,  $J = 7.8$  Hz, 1H), 7.34 (dd,  $J = 8.3, 4.2$  Hz, 1H), 5.00 (d,  $J = 16.5$  Hz, 1H), 4.38 (d,  $J = 13.9$  Hz, 1H), 4.15-3.93 (m, 2H), 3.78 (s, 3H), 3.60 (s, 3H);  $^{13}\text{C NMR}$  (101 MHz,  $\text{CDCl}_3$ )  $\delta$  170.07, 169.09, 168.75, 164.94, 156.76, 150.31, 148.48, 143.31, 140.22, 137.12, 136.79, 128.96, 128.26, 128.04, 126.80, 125.88, 123.68, 121.85, 55.69, 52.42, 52.03, 41.37; **HRMS** (ESI-TOF) calcd for  $[\text{C}_{22}\text{H}_{20}\text{N}_4\text{O}_6+\text{Na}^+]$ : 459.1275, found: 459.1277.

**Methyl 6-((2-((2-methoxy-2-oxoethyl)amino)-2-oxoethyl)(quinolin-5-yl)carbamoyl)nicotinate (*rac*-4v)**



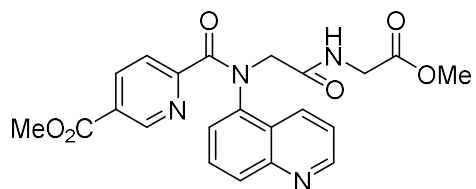

The title compound *rac-4v* was prepared according to the general procedure A and was purified by flash chromatography (ethyl acetate: dichloromethane: triethylamine = 1: 1: 1%). *rac-4v* was obtained as a yellow solid, *E: Z* = 8: 1.

**<sup>1</sup>H NMR (400 MHz, CDCl<sub>3</sub>)** δ 8.91 (dd, *J* = 4.3, 1.6 Hz, 1H), 8.55 (s, 1H), 8.48 (d, *J* = 8.4 Hz, 1H), 8.12 (dd, *J* = 8.1, 2.1 Hz, 1H), 7.98 (dd, *J* = 7.3, 2.2 Hz, 1H), 7.68 (d, *J* = 8.1 Hz, 1H), 7.52-7.45 (m, 3H), 7.13 (t, *J* = 5.5 Hz, 1H), 5.00 (d, *J* = 15.0 Hz, 1H), 4.23-4.16 (m, 2H), 4.05 (dd, *J* = 18.2, 5.0 Hz, 1H), 3.81 (s, 3H), 3.76 (s, 3H); **<sup>13</sup>C NMR (101 MHz, CDCl<sub>3</sub>)** δ 170.26, 169.31, 168.05, 164.79, 155.77, 150.86, 149.23, 148.78, 138.88, 137.48, 131.63, 130.28, 128.80, 127.26, 126.29, 125.46, 123.21, 122.01, 54.36, 52.48, 52.45, 41.19; **HRMS (ESI-TOF)** calcd for [C<sub>22</sub>H<sub>20</sub>N<sub>4</sub>O<sub>6</sub>+Na<sup>+</sup>]: 459.1275, found: 459.1277.

## 2.2 Optimization of Reaction Conditions

**Table S1. Screening of ligands<sup>a</sup>**

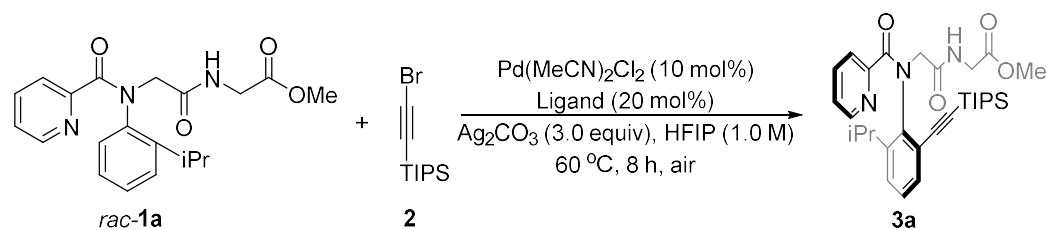

| Entry | Ligand     | Yield (%) <sup>b</sup> | ee (%) <sup>c</sup> |
|-------|------------|------------------------|---------------------|
| 1     | <b>L1</b>  | 81(78) <sup>d</sup>    | 93                  |
| 2     | <b>L2</b>  | N.R.                   | --                  |
| 3     | <b>L3</b>  | 23                     | -29                 |
| 4     | <b>L4</b>  | N.R.                   | --                  |
| 5     | <b>L5</b>  | N.R.                   | --                  |
| 6     | <b>L6</b>  | N.R.                   | --                  |
| 7     | <b>L7</b>  | 3                      | 0                   |
| 8     | <b>L8</b>  | 8                      | 0                   |
| 9     | <b>L9</b>  | N.R.                   | --                  |
| 10    | <b>L10</b> | 1                      | 2                   |

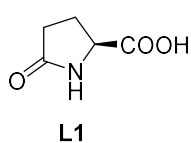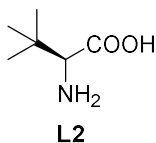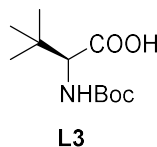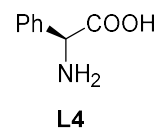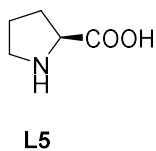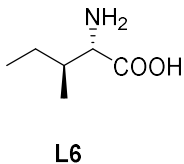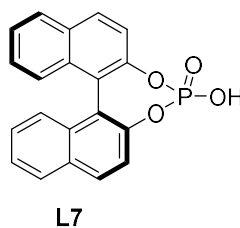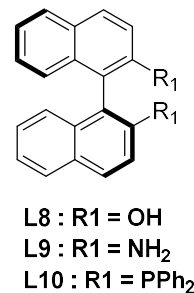

<sup>a</sup>Reaction conditions: *rac*-**1a** (0.1 mmol, 1.0 equiv), **2** (4.0 equiv), Pd(MeCN)<sub>2</sub>Cl<sub>2</sub> (0.1 equiv), Ligand (0.2 equiv), Ag<sub>2</sub>CO<sub>3</sub> (3.0 equiv), HFIP (0.1 mL), 60 °C, 8 h, air. <sup>b</sup>Determined by <sup>1</sup>H NMR spectroscopy using 1,3,5-trimethoxybenzene as the internal standard. <sup>c</sup>The ee values were determined by chiral HPLC. <sup>d</sup>Yield of isolated product is within parentheses.

**Table S2. Screening of the solvents<sup>a</sup>**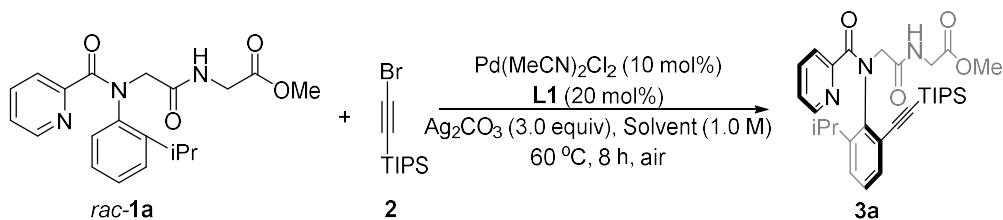

| Entry | Solvent         | Yield (%) <sup>b</sup> | ee (%) <sup>c</sup> |
|-------|-----------------|------------------------|---------------------|
| 1     | TFE             | 71                     | 76                  |
| 2     | <i>t</i> -AmyOH | 21                     | 86                  |
| 3     | MeOH            | 37                     | 85                  |
| 4     | DCE             | 31                     | 83                  |
| 5     | MeCN            | 76                     | 80                  |
| 6     | toluene         | 10                     | 77                  |
| 7     | HFIP            | 78 <sup>d</sup>        | 93                  |

<sup>a</sup>Reaction conditions: **rac-1a** (0.1 mmol, 1.0 equiv), **2** (4.0 equiv), Pd(MeCN)<sub>2</sub>Cl<sub>2</sub> (0.1 equiv), **L1** (0.2 equiv), Ag<sub>2</sub>CO<sub>3</sub> (3.0 equiv), solvent (0.1 mL), 60 °C, 8 h, air. <sup>b</sup>Determined by <sup>1</sup>H NMR spectroscopy using 1,3,5-trimethoxybenzene as the internal standard. <sup>c</sup>The ee values were determined by chiral HPLC. <sup>d</sup>Isolated yield.

**Table S3. Screening of the oxidants<sup>a</sup>**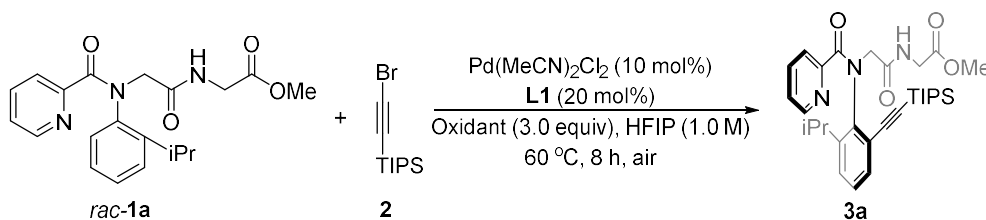

| Entry | Oxidant                                 | Yield (%) <sup>b</sup> | ee (%) <sup>c</sup> |
|-------|-----------------------------------------|------------------------|---------------------|
| 1     | AgOAc                                   | 70                     | 57                  |
| 2     | Ag <sub>3</sub> PO <sub>4</sub>         | 68                     | 95                  |
| 3     | AgTFA                                   | N.R.                   | --                  |
| 4     | AgF                                     | N.R.                   | --                  |
| 5     | Cu(OAc) <sub>2</sub>                    | 11                     | 44                  |
| 6     | Mn(OAc) <sub>2</sub> ·4H <sub>2</sub> O | 16                     | 16                  |
| 7     | Ag <sub>2</sub> CO <sub>3</sub>         | 78 <sup>d</sup>        | 93                  |

<sup>a</sup>Reaction conditions: **rac-1a** (0.1 mmol, 1.0 equiv), **2** (4.0 equiv), Pd(MeCN)<sub>2</sub>Cl<sub>2</sub> (0.1 equiv), **L1** (0.2 equiv), Oxidant (3.0 equiv), HFIP (0.1 mL), 60 °C, 8 h, air. <sup>b</sup>Determined by <sup>1</sup>H NMR spectroscopy using 1,3,5-trimethoxybenzene as the internal standard. <sup>c</sup>The ee values were determined by chiral HPLC. <sup>d</sup>Isolated yield.

**Table S4. Screening of the equivalents of 2<sup>a</sup>**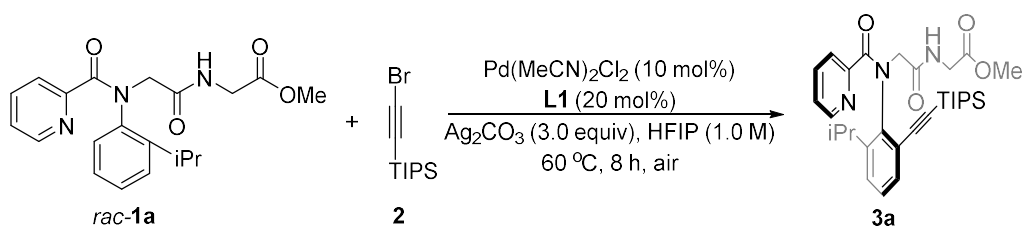

| Entry | <b>2</b>  | Yield (%) <sup>b</sup> | ee (%) <sup>c</sup> |
|-------|-----------|------------------------|---------------------|
| 1     | 1.0 equiv | 67                     | 94                  |
| 2     | 2.0 equiv | 74                     | 93                  |
| 3     | 3.0 equiv | 76                     | 93                  |
| 4     | 4.0 equiv | 78 <sup>d</sup>        | 93                  |
| 5     | 5.0 equiv | 75                     | 93                  |

<sup>a</sup>Reaction conditions: **rac-1a** (0.1 mmol, 1.0 equiv), **2**, Pd(MeCN)<sub>2</sub>Cl<sub>2</sub> (0.1 equiv), **L1** (0.2 equiv), Ag<sub>2</sub>CO<sub>3</sub> (3.0 equiv), HFIP (0.1 mL), 60 °C, 8 h, air. <sup>b</sup>Determined by <sup>1</sup>H NMR spectroscopy using 1,3,5-trimethoxybenzene as the internal standard. <sup>c</sup>The ee values were determined by chiral HPLC. <sup>d</sup>Isolated yield.

**Table S5. Screening of the equivalents of Ag<sub>2</sub>CO<sub>3</sub><sup>a</sup>**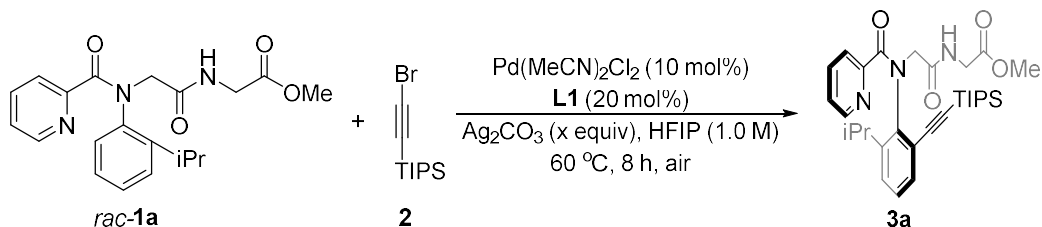

| Entry | Ag <sub>2</sub> CO <sub>3</sub> | Yield (%) <sup>b</sup> | ee (%) <sup>c</sup> |
|-------|---------------------------------|------------------------|---------------------|
| 1     | 1.0 equiv                       | 79                     | 91                  |
| 2     | 2.0 equiv                       | 77                     | 93                  |
| 3     | 3.0 equiv                       | 78 <sup>d</sup>        | 93                  |
| 4     | 4.0 equiv                       | 73                     | 94                  |

<sup>a</sup>Reaction conditions: **rac-1a** (0.1 mmol, 1.0 equiv), **2** (4.0 equiv), Pd(MeCN)<sub>2</sub>Cl<sub>2</sub> (0.1 equiv), **L1** (0.2 equiv), Ag<sub>2</sub>CO<sub>3</sub> (x equiv), HFIP (0.1 mL), 60 °C, 8 h, air. <sup>b</sup>Determined by <sup>1</sup>H NMR spectroscopy using 1,3,5-trimethoxybenzene as the internal standard. <sup>c</sup>The ee values were determined by chiral HPLC. <sup>d</sup>Isolated yield.

**Table S6. Investigation of reaction time<sup>a</sup>**

| Entry | Reaction time t / h | Yield (%) <sup>b</sup> | ee (%) <sup>c</sup> |
|-------|---------------------|------------------------|---------------------|
| 1     | 4                   | 39                     | 96                  |
| 2     | 8                   | 78 <sup>d</sup>        | 93                  |
| 3     | 12                  | 81                     | 91                  |
| 4     | 16                  | 88                     | 87                  |
| 5     | 20                  | 94                     | 84                  |
| 6     | 24                  | 99                     | 71                  |

<sup>a</sup>Reaction conditions: *rac-1a* (0.1 mmol, 1.0 equiv), **2** (4.0 equiv), Pd(MeCN)<sub>2</sub>Cl<sub>2</sub> (0.1 equiv), **L1** (0.2 equiv), Ag<sub>2</sub>CO<sub>3</sub> (3.0 equiv), HFIP (0.1 mL), 60 °C, t h, air. <sup>b</sup>Determined by <sup>1</sup>H NMR spectroscopy using 1,3,5-trimethoxybenzene as the internal standard. <sup>c</sup>The ee values were determined by chiral HPLC. <sup>d</sup>Isolated yield.

**Table S7. Investigation of reaction concentration<sup>a</sup>**

| Entry | Reaction concentration V / mL | Yield (%) <sup>b</sup> | ee (%) <sup>c</sup> |
|-------|-------------------------------|------------------------|---------------------|
| 1     | 0.1                           | 78 <sup>d</sup>        | 93                  |
| 2     | 0.2                           | 65                     | 95                  |
| 3     | 0.3                           | 63                     | 94                  |
| 4     | 0.4                           | 59                     | 94                  |
| 5     | 0.5                           | 43                     | 93                  |
| 6     | 0.6                           | 49                     | 96                  |

<sup>a</sup>Reaction conditions: *rac-1a* (0.1 mmol, 1.0 equiv), **2** (4.0 equiv), Pd(MeCN)<sub>2</sub>Cl<sub>2</sub> (0.1 equiv), **L1** (0.2 equiv), Ag<sub>2</sub>CO<sub>3</sub> (3.0 equiv), HFIP (V mL), 60 °C, 8 h, air. <sup>b</sup>Determined by <sup>1</sup>H NMR spectroscopy using 1,3,5-trimethoxybenzene as the internal standard. <sup>c</sup>The ee values were determined by chiral HPLC. <sup>d</sup>Isolated yield.

**Table S8. Optimization of conditions<sup>a</sup>**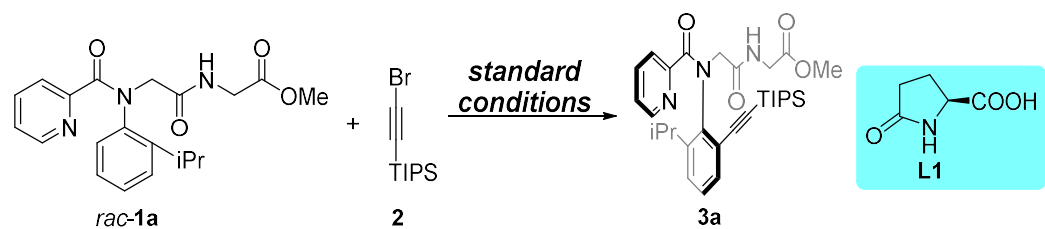

| Entry | Deviation from standard conditions   | Yield (%) <sup>b</sup> | ee (%) <sup>c</sup> |
|-------|--------------------------------------|------------------------|---------------------|
| 1     | none                                 | 81(78) <sup>d</sup>    | 93                  |
| 2     | add AcOH (40 uL)                     | 76                     | 36                  |
| 3     | add NaHCO <sub>3</sub> (1.0 equiv)   | 60                     | 89                  |
| 4     | add H <sub>2</sub> O (40 uL)         | 37                     | 93                  |
| 5     | 24 h instead of 8 h                  | 99                     | 71                  |
| 6     | HFIP (0.2 M) instead of HFIP (1.0 M) | 43                     | 93                  |
| 7     | 80 °C instead of 60 °C               | 76                     | 46                  |
| 8     | no <b>L1</b>                         | 2                      | 0                   |
| 9     | <i>D-L1</i>                          | 66                     | -93                 |

<sup>a</sup>Reaction conditions: *rac-1a* (0.1 mmol, 1.0 equiv), **2** (4.0 equiv), Pd(MeCN)<sub>2</sub>Cl<sub>2</sub> (0.1 equiv), Ligand (0.2 equiv), Ag<sub>2</sub>CO<sub>3</sub> (3.0 equiv), HFIP (0.1 mL), 60 °C, 8 h, air. <sup>b</sup>Determined by <sup>1</sup>H NMR spectroscopy using 1,3,5-trimethoxybenzene as the internal standard. <sup>c</sup>The ee values were determined by chiral HPLC. <sup>d</sup>Yield of isolated product is within parentheses.

## 2.3 Palladium-Catalyzed Atroposelective Synthesis of N-Aryl Peptoid

### Atropisomers

#### 2.3.1 General Procedure for Pd-Catalyzed Atroposelective Synthesis of Peptoid

##### Atropisomers

#### General Procedures for Atroposelective Synthesis of N-aryl peptoid atropisomers via Pd(II)-Catalyzed asymmetric C(sp<sup>2</sup>)-H Alkynylation:

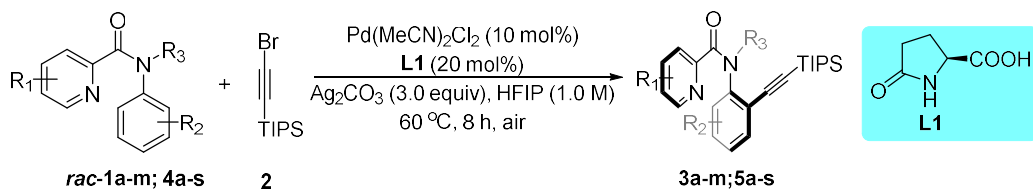

To an oven-dried 10 mL screw-capped vial was added substrate (0.10 mmol), protected alkynyl bromide (0.40 mmol), Pd(MeCN)<sub>2</sub>Cl<sub>2</sub> (2.60 mg, 0.01 mmol), **L1** (0.02 mmol), Ag<sub>2</sub>CO<sub>3</sub> (82.70 mg, 0.30 mmol), HFIP (0.1 mL). The mixture was then stirred for 8 h at 60 °C under air followed by cooling. The resulting mixture was filtered through a celite pad and concentrated in vacuo. The residue was purified by preparative TLC to afford the chiral product.<sup>2</sup> Characterization data for products are reported as follows:

#### Methyl *N*-(2-isopropyl-6-((triisopropylsilyl)ethynyl)phenyl)-*N*-picolinoylglycylglycinate (**3a**)

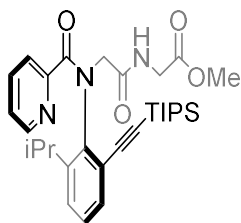

The title compound **3a** was prepared under the optimized conditions and purified by preparative TLC (petroleum ether: ethyl acetate = 2: 1). **3a** was obtained as a light yellow oil (42.8 mg, 78%, *E*: *Z* = 2: 1). <sup>1</sup>H NMR (400 MHz, CDCl<sub>3</sub>) δ 8.35 (d, *J* = 4.5 Hz, 1H), 7.82 (t, *J* = 5.4 Hz, 1H), 7.61 (d, *J* = 7.8 Hz, 1H), 7.52 (td, *J* = 7.7, 1.5 Hz, 1H), 7.30-7.27 (m, 1H), 7.16-7.10 (m, 3H), 5.22 (d, *J* = 14.6 Hz, 1H), 4.15 (dd, *J* = 18.0, 5.8 Hz, 1H), 4.03 (dd, *J* = 18.0, 5.4 Hz, 1H), 3.87 (d, *J* = 14.7 Hz, 1H), 3.76 (s, 3H), 3.20-3.14 (m, 1H), 1.10 (s, 21H), 1.05 (d, *J* = 6.8 Hz, 3H), 0.80 (d, *J* = 6.7 Hz, 3H); <sup>13</sup>C NMR (101 MHz, CDCl<sub>3</sub>) δ 169.91, 169.79, 169.18, 152.11, 148.43, 147.55, 141.93, 135.86, 131.37, 128.35, 127.41, 124.71, 123.49, 122.28, 103.79, 96.91, 56.04, 52.30, 41.24, 28.28, 25.09, 22.81, 18.67, 11.34; **HRMS (ESI-TOF)** calcd for [C<sub>31</sub>H<sub>43</sub>N<sub>3</sub>O<sub>4</sub>Si+Na<sup>+</sup>]: 572.2915, found: 572.2916; Enantiomeric excess was determined by HPLC with a Daicel Chiralpak OD-H, *n*-Hexane/*i*-PrOH = 90/10, rate = 0.8 mL/min, λ = 254 nm, *t* (major) = 7.9 min, *t* (minor) = 11.6 min, 93% ee; [α]<sub>D</sub><sup>20</sup> = -139.2 (c = 1.0, CHCl<sub>3</sub>).

**Methyl** *N*-(2-isopropyl-6-((triisopropylsilyl)ethynyl)phenyl)-*N*-(isoquinoline-3-carbonyl)glycylglycinate (**3d**)

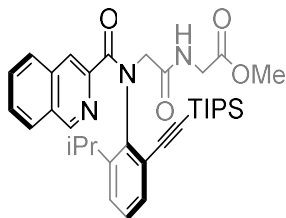

The title compound **3d** was prepared under the optimized conditions and purified by preparative TLC (petroleum ether: ethyl acetate = 2: 1). **3d** was obtained as a light yellow oil (6.6 mg, 11%, *E*: *Z* = 4: 1). **<sup>1</sup>H NMR (400 MHz, CDCl<sub>3</sub>)** δ 8.04 (d, *J* = 8.6 Hz, 1H), 7.86 (d, *J* = 8.6 Hz, 2H), 7.72 (t, *J* = 8.8 Hz, 2H), 7.60 (td, *J* = 6.8, 1.5 Hz, 1H), 7.49 (td, *J* = 8.0, 1.3 Hz, 1H), 7.28-7.26 (m, 1H), 7.15-7.13 (m, 2H), 5.25 (d, *J* = 14.7 Hz, 1H), 4.14 (dd, *J* = 9.8, 5.8 Hz, 2H), 3.95 (d, *J* = 14.7 Hz, 1H), 3.78 (s, 3H), 3.35-3.28 (m, 1H), 1.13-1.08 (m, 24H), 0.85 (d, *J* = 6.8 Hz, 3H); **<sup>13</sup>C NMR (101 MHz, CDCl<sub>3</sub>)** δ 169.98, 169.70, 169.22, 151.75, 147.30, 146.54, 142.42, 135.99, 131.33, 129.79, 129.68, 128.19, 127.93, 127.70, 127.34, 127.33, 122.30, 120.44, 104.09, 96.56, 56.34, 52.31, 41.27, 28.30, 25.08, 23.00, 18.68, 11.35; **HRMS (ESI-TOF)** calcd for [C<sub>35</sub>H<sub>45</sub>N<sub>3</sub>O<sub>4</sub>Si+Na<sup>+</sup>]: 622.3071, found: 622.3072; Enantiomeric excess was determined by HPLC with a Daicel Chiralpak OD-H, *n*-Hexane/*i*-PrOH = 80/20, rate = 0.8 mL/min, λ = 254 nm, *t* (minor) = 5.5 min, *t* (major) = 7.3 min, 61% ee; [α]<sub>D</sub><sup>20</sup> = +59.4 (c = 0.5, CHCl<sub>3</sub>).

**Methyl** *N*-(2-isopropyl-6-((triisopropylsilyl)ethynyl)phenyl)-*N*-(pyrimidine-2-carbonyl)glycylglycinate (**3e**)

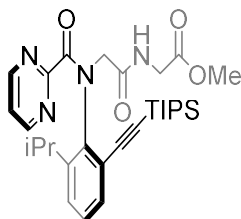

The title compound **3e** was prepared under the optimized conditions and purified by preparative TLC (petroleum ether: ethyl acetate = 2: 1). **3e** was obtained as a light yellow oil (34.7 mg, 63%, *E*: *Z* = 9: 1). **<sup>1</sup>H NMR (400 MHz, CDCl<sub>3</sub>)** δ 8.50 (d, *J* = 4.8 Hz, 2H), 7.78 (t, *J* = 5.8 Hz, 1H), 7.24 (dd, *J* = 7.3, 1.8 Hz, 1H), 7.12-7.05 (m, 3H), 5.20 (d, *J* = 14.7 Hz, 1H), 4.12 (dd, *J* = 18.0, 5.9 Hz, 1H), 4.00 (dd, *J* = 17.9, 5.5 Hz, 1H), 3.90 (d, *J* = 14.7 Hz, 1H), 3.73 (s, 3H), 3.21-3.14 (m, 1H), 1.09 (s, 21H), 1.04 (d, *J* = 6.8 Hz, 3H), 0.81 (d, *J* = 6.8 Hz, 3H); **<sup>13</sup>C NMR (101 MHz, CDCl<sub>3</sub>)** δ 169.79, 169.05, 167.49, 160.33, 156.40, 147.20, 141.10, 131.21, 128.40, 126.85, 123.20, 121.25, 103.56, 96.72, 55.85, 52.27, 41.23, 28.17, 25.22, 22.92, 18.64, 11.34; **HRMS (ESI-TOF)** calcd for [C<sub>30</sub>H<sub>42</sub>N<sub>4</sub>O<sub>4</sub>Si+Na<sup>+</sup>]: 573.2867, found: 573.2867; Enantiomeric excess was determined by HPLC with a Daicel Chiralpak OD-H, *n*-Hexane/*i*-PrOH = 80/20, rate = 0.8 mL/min, λ = 254 nm, *t* (major) = 6.9 min, *t* (minor) = 11.9 min, 83% ee; [α]<sub>D</sub><sup>20</sup> = -109.2 (c = 1.0, CHCl<sub>3</sub>).

**Methyl** *N*-(2-isopropyl-6-((triisopropylsilyl)ethynyl)phenyl)-*N*-(5-methoxypicolinoyl)glycylglycinate (**3f**)



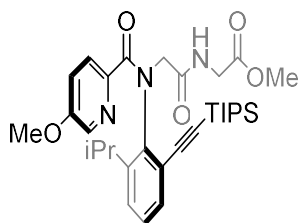

The title compound **3f** was prepared under the optimized conditions and purified by preparative TLC (petroleum ether: ethyl acetate = 2: 1). **3f** was obtained as a light yellow oil (12.7 mg, 22%, *E: Z* = 3: 1). **<sup>1</sup>H NMR (400 MHz, CDCl<sub>3</sub>)** δ 8.10 (d, *J* = 2.8 Hz, 1H), 7.99 (t, *J* = 5.6 Hz, 1H), 7.74 (d, *J* = 8.7 Hz, 1H), 7.44-7.38 (m, 2H), 7.27 (d, *J* = 3.1 Hz, 1H), 7.10 (dd, *J* = 8.7, 2.9 Hz, 1H), 5.29 (d, *J* = 14.6 Hz, 1H), 4.25 (dd, *J* = 18.0, 5.8 Hz, 1H), 4.13 (dd, *J* = 18.0, 5.5 Hz, 1H), 3.98 (d, *J* = 14.6 Hz, 1H), 3.88 (s, 3H), 3.87 (s, 3H), 3.29-3.22 (m, 1H), 1.21 (s, 21H), 1.18 (d, *J* = 6.9 Hz, 3H), 0.90 (d, *J* = 6.7 Hz, 3H); **<sup>13</sup>C NMR (101 MHz, CDCl<sub>3</sub>)** δ 169.93, 169.33, 167.73, 156.31, 147.30, 144.07, 142.51, 136.22, 131.33, 128.08, 127.38, 125.10, 122.14, 119.28, 103.89, 96.57, 56.21, 55.55, 52.26, 41.20, 28.28, 24.93, 22.94, 18.66, 11.33; **HRMS (ESI-TOF)** calcd for [C<sub>32</sub>H<sub>45</sub>N<sub>3</sub>O<sub>5</sub>Si+Na<sup>+</sup>]: 602.3020, found: 602.3022; Enantiomeric excess was determined by HPLC with a Daicel Chiralpak OD-H, *n*-Hexane/*i*-PrOH = 85/15, rate = 0.8 mL/min, λ = 254 nm, t (major) = 7.2 min, t (minor) = 9.2 min, 96% ee; [α]<sub>D</sub><sup>20</sup> = -107.8 (c = 0.5, CHCl<sub>3</sub>).

**Methyl *N*-(2-isopropyl-6-((triisopropylsilyl)ethynyl)phenyl)-*N*-(5-(trifluoromethyl)picolinoyl)glycylglycinate (3g)**

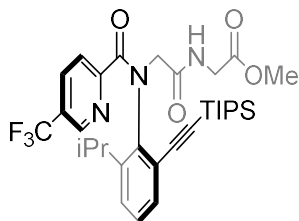

The title compound **3g** was prepared under the optimized conditions and purified by preparative TLC (petroleum ether: ethyl acetate = 2: 1). **3g** was obtained as a light yellow oil (57.4 mg, 93%, *E: Z* = 7: 1). **<sup>1</sup>H NMR (400 MHz, CDCl<sub>3</sub>)** δ 8.51 (s, 1H), 7.86-7.80 (m, 2H), 7.57 (t, *J* = 5.4 Hz, 1H), 7.24 (dd, *J* = 6.1, 3.1 Hz, 1H), 7.18-7.13 (m, 2H), 5.16 (d, *J* = 14.8 Hz, 1H), 4.09 (d, *J* = 5.6 Hz, 2H), 3.84 (d, *J* = 14.8 Hz, 1H), 3.74 (s, 3H), 3.31-3.24 (m, 1H), 1.12-1.07 (m, 24H), 0.92 (d, *J* = 6.8 Hz, 3H); **<sup>13</sup>C NMR (101 MHz, CDCl<sub>3</sub>)** δ 169.88, 168.60, 168.48, 155.47, 147.60, 144.86 (q, *J*<sub>CF</sub> = 2.0 Hz), 141.66, 133.31 (q, *J*<sub>CF</sub> = 4.0 Hz), 131.38, 128.63, 127.53, 125.06 (q, *J*<sub>CF</sub> = 152.5 Hz), 123.49, 122.20, 103.62, 96.86, 56.02, 52.29, 41.21, 28.30, 24.96, 22.87, 18.63, 11.33; **<sup>19</sup>F NMR (376 MHz, CDCl<sub>3</sub>)** δ -62.71; **HRMS (ESI-TOF)** calcd for [C<sub>32</sub>H<sub>42</sub>F<sub>3</sub>N<sub>3</sub>O<sub>4</sub>Si+Na<sup>+</sup>]: 640.2789, found: 640.2791; Enantiomeric excess was determined by HPLC with a Daicel Chiralpak AD-H, *n*-Hexane/*i*-PrOH = 85/15, rate = 0.8 mL/min, λ = 254 nm, t (minor) = 6.6 min, t (major) = 10.2 min, 97% ee; [α]<sub>D</sub><sup>20</sup> = -109.5 (c = 1.0, CHCl<sub>3</sub>).

**Methyl 6-((2-isopropyl-6-((triisopropylsilyl)ethynyl)phenyl)(2-((2-methoxy-2-oxoethyl)amino)-2-oxoethyl)carbamoyl)nicotinate (3h)**

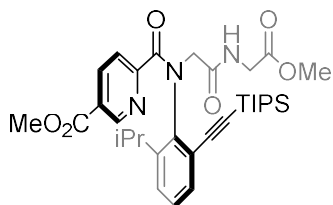

The title compound **3h** was prepared under the optimized conditions and purified by preparative TLC (petroleum ether: ethyl acetate = 2: 1). **3h** was obtained as a light yellow oil (58.8 mg, 97%, *E: Z* = 6: 1). **<sup>1</sup>H NMR (400 MHz, CDCl<sub>3</sub>)** δ 8.86 (dd, *J* = 2.1, 0.9 Hz, 1H), 8.15 (dd, *J* = 8.2, 2.0 Hz, 1H), 7.75 (dd, *J* = 8.1, 0.8 Hz, 1H), 7.64 (t, *J* = 5.6 Hz, 1H), 7.23 (dd, *J* = 5.5, 3.6 Hz, 1H), 7.15-7.13 (m, 2H), 5.18 (d, *J* = 14.8 Hz, 1H), 4.09 (t, *J* = 5.6 Hz, 2H), 3.86 (s, 3H), 3.83 (d, *J* = 14.8 Hz, 1H), 3.74 (s, 3H), 3.28-3.22 (m, 1H), 1.09 (s, 21H), 1.07 (d, *J* = 6.8 Hz, 3H), 0.91 (d, *J* = 6.7 Hz, 3H); **<sup>13</sup>C NMR (101 MHz, CDCl<sub>3</sub>)** δ 169.88, 169.08, 168.78, 165.00, 155.61, 149.20, 147.71, 141.64, 137.14, 131.34, 128.57, 127.49, 126.39, 123.13, 122.25, 103.64, 96.91, 55.96, 52.50, 52.30, 41.24, 28.32, 25.05, 22.90, 18.66, 11.33; **HRMS (ESI-TOF)** calcd for [C<sub>33</sub>H<sub>45</sub>N<sub>3</sub>O<sub>6</sub>Si+Na<sup>+</sup>]: 630.2970, found: 630.2973; Enantiomeric excess was determined by HPLC with a Daicel Chiralpak OD-H, *n*-Hexane/*i*-PrOH = 95/5, rate = 0.8 mL/min, λ = 254 nm, *t* (major) = 15.3 min, *t* (minor) = 22.3 min, 97% ee; [α]<sub>D</sub><sup>20</sup> = -159.9 (c = 1.0, CHCl<sub>3</sub>).

**Methyl *N*-(2-isopropyl-6-((triisopropylsilyl)ethynyl)phenyl)-*N*-(5-nitropicolinoyl)glycylglycinate (3i)**

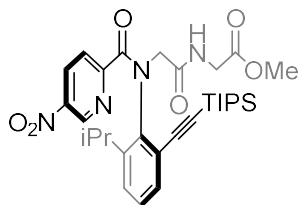

The title compound **3i** was prepared under the optimized conditions and purified by preparative TLC (petroleum ether: ethyl acetate = 2: 1). **3i** was obtained as a light yellow oil (42.2 mg, 71%, *E: Z* = 17: 1). **<sup>1</sup>H NMR (400 MHz, CDCl<sub>3</sub>)** δ 9.02 (d, *J* = 2.5 Hz, 1H), 8.37 (dd, *J* = 8.6, 2.6 Hz, 1H), 7.95 (d, *J* = 8.6 Hz, 1H), 7.44 (t, *J* = 5.6 Hz, 1H), 7.23-7.17 (m, 3H), 5.14 (d, *J* = 14.9 Hz, 1H), 4.10 (t, *J* = 5.9 Hz, 2H), 3.83 (d, *J* = 14.9 Hz, 1H), 3.76 (s, 3H), 3.38-3.31 (m, 1H), 1.10 (s, 21H), 1.02 (d, *J* = 6.8 Hz, 6H); **<sup>13</sup>C NMR (101 MHz, CDCl<sub>3</sub>)** δ 169.92, 168.30, 167.92, 157.26, 147.80, 143.92, 143.18, 141.40, 131.40, 131.28, 128.86, 127.64, 124.20, 122.25, 103.47, 97.04, 55.92, 52.36, 41.25, 28.34, 25.00, 22.98, 18.67, 11.35; **HRMS (ESI-TOF)** calcd for [C<sub>31</sub>H<sub>42</sub>N<sub>4</sub>O<sub>6</sub>Si+Na<sup>+</sup>]: 617.2766, found: 617.2768; Enantiomeric excess was determined by HPLC with a Daicel Chiralpak AD-H, *n*-Hexane/*i*-PrOH = 85/15, rate = 0.8 mL/min, λ = 254 nm, *t* (minor) = 8.9 min, *t* (major) = 10.4 min, 97% ee; [α]<sub>D</sub><sup>20</sup> = -92.1 (c = 1.0, CHCl<sub>3</sub>).

**Methyl *N*-(5-bromopicolinoyl)-*N*-(2-isopropyl-6-((triisopropylsilyl)ethynyl)phenyl)glycylglycinate (3j)**

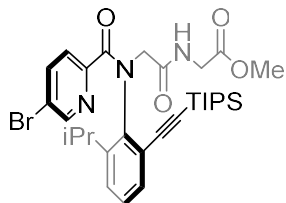

The title compound **3j** was prepared under the optimized conditions and purified by preparative TLC (petroleum ether: ethyl acetate = 2: 1). **3j** was obtained as a light yellow oil (60.8 mg, 97%, *E: Z* = 6: 1). **<sup>1</sup>H NMR (400 MHz, CDCl<sub>3</sub>)** δ 8.30 (dd, *J* = 2.2, 0.6 Hz, 1H), 7.68 (dd, *J* = 8.4, 2.3 Hz, 1H), 7.63 (t, *J* = 5.5 Hz, 1H), 7.60 (dd, *J* = 8.4, 0.6 Hz, 1H), 7.26-7.22 (m, 1H), 7.16-7.14 (m, 2H), 5.13 (d, *J* = 14.7 Hz, 1H), 4.06 (dd, *J* = 5.6, 2.5 Hz, 2H), 3.81 (d, *J* = 14.8 Hz, 1H), 3.72 (s, 3H), 3.24-3.17 (m, 1H), 1.08-1.05 (m, 24H), 0.89 (d, *J* = 6.8 Hz, 3H); **<sup>13</sup>C NMR (101 MHz, CDCl<sub>3</sub>)** δ 169.87, 168.80, 150.48, 149.10, 147.47, 142.00, 138.66, 131.33, 128.42, 127.47, 125.17, 122.37, 122.12, 103.70, 96.69, 56.06, 52.28, 41.20, 28.28, 24.94, 22.95, 18.65, 11.32; **HRMS (ESI-TOF)** calcd for [C<sub>31</sub>H<sub>42</sub>BrN<sub>3</sub>O<sub>4</sub>Si+Na<sup>+</sup>]: 650.2020, found: 650.2022; Enantiomeric excess was determined by HPLC with a Daicel Chiralpak OD-H, *n*-Hexane/*i*-PrOH = 95/5, rate = 0.8 mL/min, λ = 254 nm, *t* (major) = 10.0 min, *t* (minor) = 14.3 min, 94% ee; [α]<sub>D</sub><sup>20</sup> = -149.1 (c = 1.0, CHCl<sub>3</sub>).

**Methyl *N*-(5-fluoropicolinoyl)-*N*-(2-isopropyl-6-((triisopropylsilyl)ethynyl)phenyl)glycylglycinate (3k)**

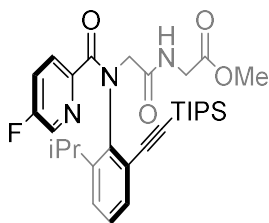

The title compound **3k** was prepared under the optimized conditions and purified by preparative TLC (petroleum ether: ethyl acetate = 2: 1). **3k** was obtained as a light yellow oil (43.7 mg, 77%, *E: Z* = 5: 1). **<sup>1</sup>H NMR (400 MHz, CDCl<sub>3</sub>)** δ 8.07 (d, *J* = 2.7 Hz, 1H), 7.73 (dd, *J* = 8.8, 4.4 Hz, 1H), 7.66 (t, *J* = 5.6 Hz, 1H), 7.25-7.21 (m, 2H), 7.14-7.12 (m, 2H), 5.13 (d, *J* = 14.8 Hz, 1H), 4.05 (dd, *J* = 5.6, 2.8 Hz, 2H), 3.81 (d, *J* = 14.8 Hz, 1H), 3.71 (s, 3H), 3.21-3.14 (m, 1H), 1.07-1.03 (m, 24H), 0.83 (d, *J* = 6.8 Hz, 3H); **<sup>13</sup>C NMR (101 MHz, CDCl<sub>3</sub>)** δ 169.90, 168.92, 168.61, 159.51 (d, *J*<sub>CF</sub> = 161.6 Hz), 148.23 (d, *J*<sub>CF</sub> = 5.1 Hz), 147.39, 142.15, 136.45 (d, *J*<sub>CF</sub> = 23.2 Hz), 131.31, 128.33, 127.41, 125.60 (d, *J*<sub>CF</sub> = 5.1 Hz), 122.66 (d, *J*<sub>CF</sub> = 19.2 Hz), 122.15, 103.74, 96.62, 56.10, 52.26, 41.18, 28.26, 24.92, 22.89, 18.63, 11.31; **<sup>19</sup>F NMR (376 MHz, CDCl<sub>3</sub>)** δ -122.78; **HRMS (ESI-TOF)** calcd for [C<sub>31</sub>H<sub>42</sub>FN<sub>3</sub>O<sub>4</sub>Si+Na<sup>+</sup>]: 590.2821, found: 590.2820; Enantiomeric excess was determined by HPLC with a Daicel Chiralpak OD-H, *n*-Hexane/*i*-PrOH = 90/10, rate = 0.8 mL/min, λ = 254 nm, *t* (major) = 6.7 min, *t* (minor) = 8.6 min, 96% ee; [α]<sub>D</sub><sup>20</sup> = -120.8 (c = 1.0, CHCl<sub>3</sub>).

**Methyl *N*-(4-chloropicolinoyl)-*N*-(2-isopropyl-6-((triisopropylsilyl)ethynyl)phenyl)glycylglycinate (3l)**

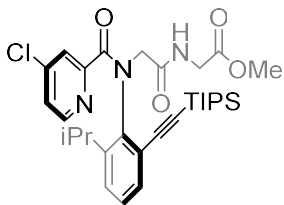

The title compound **3I** was prepared under the optimized conditions and purified by preparative TLC (petroleum ether: ethyl acetate = 2: 1). **3I** was obtained as a light yellow oil (54.8 mg, 94%, *E: Z* = 3: 1). **<sup>1</sup>H NMR (400 MHz, CDCl<sub>3</sub>)** δ 8.14 (d, *J* = 5.2 Hz, 1H), 7.74 (d, *J* = 2.0 Hz, 1H), 7.63 (t, *J* = 5.4 Hz, 1H), 7.24 (dd, *J* = 6.3, 2.7 Hz, 1H), 7.17-7.12 (m, 3H), 5.12 (d, *J* = 14.8 Hz, 1H), 4.07 (dd, *J* = 5.4, 4.2 Hz, 2H), 3.83 (d, *J* = 14.8 Hz, 1H), 3.73 (s, 3H), 3.27-3.20 (m, 1H), 1.11-1.07 (m, 24H), 0.94 (d, *J* = 6.8 Hz, 3H); **<sup>13</sup>C NMR (101 MHz, CDCl<sub>3</sub>)** δ 169.85, 168.85, 168.70, 153.44, 148.90, 147.58, 144.27, 141.69, 131.35, 128.55, 127.49, 125.05, 124.18, 122.15, 103.62, 96.93, 55.96, 52.29, 41.22, 28.33, 24.92, 22.90, 18.63, 11.31; **HRMS (ESI-TOF)** calcd for [C<sub>31</sub>H<sub>42</sub>ClN<sub>3</sub>O<sub>4</sub>Si+Na<sup>+</sup>]: 606.2525, found: 606.2526; Enantiomeric excess was determined by HPLC with a Daicel Chiralpak OD-H, *n*-Hexane/*i*-PrOH = 97/3, rate = 0.8 mL/min, λ = 254 nm, t (major) = 13.5 min, t (minor) = 21.1 min, 95% ee; [α]<sub>D</sub><sup>20</sup> = -93.4 (c = 1.0, CHCl<sub>3</sub>).

**Methyl 6-((2-((2,6-dimethylphenyl)amino)-2-oxoethyl)(2-isopropyl-6-((triisopropylsilyl)ethynyl)phenyl)carbamoyl)nicotinate (5a)**

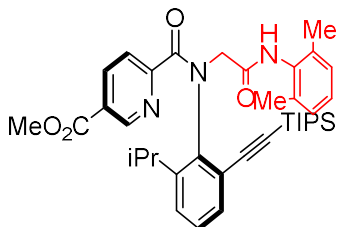

The title compound **5a** was prepared under the optimized conditions and purified by preparative TLC (petroleum ether: ethyl acetate = 2: 1). **5a** was obtained as a white powder (57.5 mg, 90%, *E: Z* = 17: 1). **<sup>1</sup>H NMR (400 MHz, CDCl<sub>3</sub>)** δ 8.77 (s, 1H), 8.63 (s, 1H), 8.23 (dd, *J* = 8.1, 1.8 Hz, 1H), 7.94 (d, *J* = 8.2 Hz, 1H), 7.29 (t, *J* = 4.8 Hz, 1H), 7.17 (d, *J* = 4.8 Hz, 2H), 7.08-7.04 (m, 3H), 5.04 (d, *J* = 15.3 Hz, 1H), 4.18 (d, *J* = 15.3 Hz, 1H), 3.88 (s, 3H), 3.51-3.45 (m, 1H), 2.30 (s, 6H), 1.26 (d, *J* = 6.8 Hz, 3H), 1.21 (d, *J* = 6.8 Hz, 3H), 1.06 (s, 21H); **<sup>13</sup>C NMR (101 MHz, CDCl<sub>3</sub>)** δ 169.50, 166.66, 165.10, 155.91, 148.61, 147.53, 142.43, 137.24, 135.39, 133.80, 131.44, 128.42, 128.17, 127.88, 127.19, 126.40, 123.68, 122.02, 104.17, 97.14, 56.86, 52.51, 28.78, 24.73, 23.22, 18.67, 18.59, 18.54, 11.39; **HRMS (ESI-TOF)** calcd for [C<sub>38</sub>H<sub>49</sub>N<sub>3</sub>O<sub>4</sub>Si+Na<sup>+</sup>]: 662.3384, found: 662.3387; Enantiomeric excess was determined by HPLC with a Daicel Chiralpak IC, *n*-Hexane/*i*-PrOH = 80/20, rate = 0.8 mL/min, λ = 254 nm, t (minor) = 15.3 min, t (major) = 25.1 min, 93% ee; [α]<sub>D</sub><sup>20</sup> = -55.3 (c = 1.0, CHCl<sub>3</sub>).

**Methyl 6-((2-(cyclohexylamino)-2-oxoethyl)(2-isopropyl-6-((triisopropylsilyl)ethynyl)phenyl)carbamoyl)nicotinate (5b)**

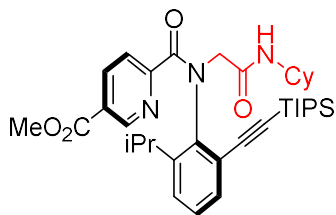

The title compound **5b** was prepared under the optimized conditions and purified by preparative TLC (petroleum ether: ethyl acetate = 2: 1). **5b** was obtained as a light yellow oil (61.1 mg, 99%, *E: Z* = 14: 1).

<sup>1</sup>H NMR (400 MHz, CDCl<sub>3</sub>) δ 8.85 (s, 1H), 8.14 (dd, *J* = 8.4, 2.1 Hz, 1H), 7.73 (d, *J* = 8.1 Hz, 1H), 7.20 (dd, *J* = 6.8, 2.3 Hz, 1H), 7.17-7.10 (m, 3H), 5.18 (d, *J* = 14.7 Hz, 1H), 3.87 (s, 3H), 3.83-3.75 (m, 1H), 3.67 (d, *J* = 14.7 Hz, 1H), 3.27-3.21 (m, 1H), 1.95-1.90 (m, 2H), 1.74-1.67 (m, 2H), 1.41-1.20 (m, 6H), 1.13 (d, *J* = 6.9 Hz, 3H), 1.10 (s, 21H), 0.98 (d, *J* = 6.3 Hz, 3H); <sup>13</sup>C NMR (101 MHz, CDCl<sub>3</sub>) δ 169.28, 167.75, 165.05, 156.03, 149.14, 147.81, 141.90, 137.09, 131.26, 128.51, 127.36, 126.26, 122.87, 122.29, 103.63, 96.73, 56.59, 52.48, 48.21, 32.82, 32.72, 28.46, 25.56, 25.32, 24.63, 22.82, 18.67, 11.35; **HRMS (ESI-TOF)** calcd for [C<sub>36</sub>H<sub>51</sub>N<sub>3</sub>O<sub>4</sub>Si+Na<sup>+</sup>]: 640.3541, found: 640.3542; Enantiomeric excess was determined by HPLC with a Daicel Chiralpak IC, *n*-Hexane/*i*-PrOH = 80/20, rate = 0.8 mL/min, λ = 254 nm, t (minor) = 7.9 min, t (major) = 15.7 min, 96% ee; [α]<sub>D</sub><sup>20</sup> = -182.7 (c = 1.0, CHCl<sub>3</sub>).

**Methyl** **6-((2-((2-ethoxy-2-oxoethyl)amino)-2-oxoethyl)(2-isopropyl-6-((triisopropylsilyl)ethynyl)phenyl)carbamoyl)nicotinate (5c)**

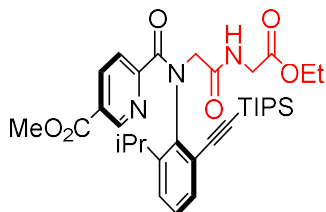

The title compound **5c** was prepared under the optimized conditions and purified by preparative TLC (petroleum ether: ethyl acetate = 2: 1). **5c** was obtained as a light yellow oil (50.9 mg, 82%, *E: Z* = 6: 1). <sup>1</sup>H NMR (400 MHz, CDCl<sub>3</sub>) δ 8.86 (d, *J* = 1.3 Hz, 1H), 8.15 (dd, *J* = 8.2, 2.1 Hz, 1H), 7.77 (dd, *J* = 8.2, 0.9 Hz, 1H), 7.61 (t, *J* = 5.5 Hz, 1H), 7.24-7.20 (m, 1H), 7.16-7.11 (m, 2H), 5.18 (d, *J* = 14.7 Hz, 1H), 4.21 (q, *J* = 7.1 Hz, 2H), 4.08 (dd, *J* = 8.6, 5.5 Hz, 2H), 3.87 (s, 3H), 3.84 (d, *J* = 14.8 Hz, 1H), 3.30-3.24 (m, 1H), 1.27 (t, *J* = 7.1 Hz, 3H), 1.11-1.07 (m, 24H), 0.92 (d, *J* = 6.7 Hz, 3H); <sup>13</sup>C NMR (101 MHz, CDCl<sub>3</sub>) δ 169.40, 169.06, 168.74, 165.04, 155.66, 149.18, 147.74, 141.72, 137.13, 131.34, 128.55, 127.48, 126.38, 123.18, 122.27, 103.67, 96.87, 61.39, 56.00, 52.49, 41.41, 28.33, 25.06, 22.89, 18.66, 14.15, 11.35; **HRMS (ESI-TOF)** calcd for [C<sub>34</sub>H<sub>47</sub>N<sub>3</sub>O<sub>6</sub>Si+Na<sup>+</sup>]: 644.3126, found: 644.3128; Enantiomeric excess was determined by HPLC with a Daicel Chiralpak AD-H, *n*-Hexane/*i*-PrOH = 80/20, rate = 0.8 mL/min, λ = 254 nm, t (minor) = 6.2 min, t (major) = 8.4 min, 96% ee; [α]<sub>D</sub><sup>20</sup> = -168.4 (c = 1.0, CHCl<sub>3</sub>).

**(1*R*,2*S*,5*R*)-2-isopropyl-5-methylcyclohexyl** ***N*-(2-isopropyl-6-((triisopropylsilyl)ethynyl)phenyl)-*N*-(5-nitropicolinoyl)glycylglycinate (5d)**

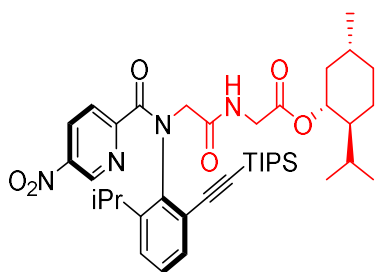

The title compound **5d** was prepared under the optimized conditions and purified by preparative TLC (petroleum ether: ethyl acetate = 2: 1). **5d** was obtained as a light yellow oil (36.6 mg, 51%, *E: Z* = 10: 1).

**<sup>1</sup>H NMR (400 MHz, CDCl<sub>3</sub>)** δ 9.02 (d, *J* = 2.6 Hz, 1H), 8.37 (dd, *J* = 8.6, 2.6 Hz, 1H), 7.98 (d, *J* = 8.6 Hz, 1H), 7.36 (t, *J* = 4.9 Hz, 1H), 7.24-7.15 (m, 3H), 5.15 (d, *J* = 14.9 Hz, 1H), 4.76 (td, *J* = 10.9, 4.4 Hz, 1H), 4.14-4.02 (m, 2H), 3.83 (d, *J* = 14.9 Hz, 1H), 3.41-3.34 (m, 1H), 2.04-1.98 (m, 1H), 1.89-1.81 (m, 1H), 1.71-1.65 (m, 2H), 1.55-1.45 (m, 1H), 1.43-1.36 (m, 1H), 1.14-0.99 (m, 29H), 0.92-0.86 (m, 7H), 0.75 (d, *J* = 6.9 Hz, 3H); **<sup>13</sup>C NMR (101 MHz, CDCl<sub>3</sub>)** δ 169.10, 168.16, 167.81, 157.33, 147.83, 143.95, 143.15, 141.52, 131.40, 131.27, 128.82, 127.62, 124.35, 122.31, 103.52, 96.97, 75.73, 55.92, 46.91, 41.59, 40.79, 34.14, 31.39, 28.33, 26.30, 25.01, 23.46, 22.99, 22.00, 20.72, 18.68, 16.38, 11.36; **HRMS (ESI-TOF)** calcd for [C<sub>40</sub>H<sub>58</sub>N<sub>4</sub>O<sub>6</sub>Si+Na<sup>+</sup>]: 741.4018, found: 741.4018; Enantiomeric excess was determined by HPLC with a Daicel Chiralpak AD-H, *n*-Hexane/*i*-PrOH = 97/3, rate = 0.8 mL/min, λ = 254 nm, *t* (minor) = 12.8 min, *t* (major) = 17.3 min, 97% ee; [α]<sub>D</sub><sup>20</sup> = -147.8 (c = 1.0, CHCl<sub>3</sub>).

**(3S)-10,13-dimethyl-17-oxo-2,3,4,7,8,9,10,11,12,13,14,15,16,17-tetradecahydro-1*H*-cyclopenta[*a*]phenanthren-3-yl *N*-(2-isopropyl-6-((triisopropylsilyl)ethynyl)phenyl)-*N*-(5-nitropicolinoyl)glycylglycinate (**5e**)**

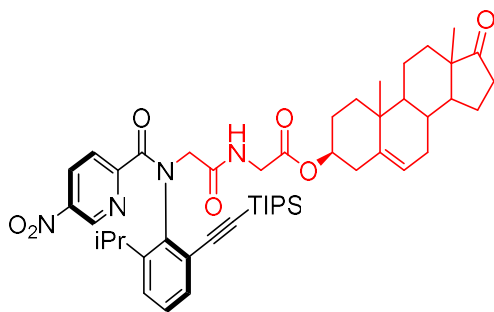

The title compound **5e** was prepared under the optimized conditions and purified by preparative TLC (petroleum ether: ethyl acetate = 2: 1). **5e** was obtained as a yellow oil (62.1 mg, 73%, *E: Z* = 11: 1).

**<sup>1</sup>H NMR (400 MHz, CDCl<sub>3</sub>)** δ 9.01 (d, *J* = 2.4 Hz, 1H), 8.36 (dd, *J* = 8.6, 2.6 Hz, 1H), 7.96 (d, *J* = 8.6 Hz, 1H), 7.41 (t, *J* = 5.4 Hz, 1H), 7.23-7.14 (m, 3H), 5.39 (d, *J* = 5.0 Hz, 1H), 5.14 (d, *J* = 14.9 Hz, 1H), 4.72-4.64 (m, 1H), 4.13-4.01 (m, 2H), 3.82 (d, *J* = 14.9 Hz, 1H), 3.39-3.32 (m, 1H), 2.48-2.34 (m, 3H), 2.12-2.02 (m, 2H), 1.97-1.79 (m, 5H), 1.70-1.42 (m, 7H), 1.31-1.23 (m, 3H), 1.10 (s, 21H), 1.03 (s, 3H), 1.02-0.98 (m, 5H), 0.87 (s, 3H); **<sup>13</sup>C NMR (101 MHz, CDCl<sub>3</sub>)** δ 168.82, 168.80, 168.20, 167.88, 157.31, 147.82, 143.93, 143.17, 141.45, 139.64, 131.41, 131.27, 128.85, 127.64, 124.22, 122.27, 122.17, 103.49, 97.03, 75.06, 55.94, 51.70, 50.12, 47.51, 41.63, 37.99, 37.96, 36.86, 36.71, 35.82, 31.45, 31.40, 30.78, 28.34, 27.62, 25.03, 22.99, 21.87, 20.33, 19.31, 18.68, 13.55, 11.35; **HRMS (ESI-TOF)** calcd for [C<sub>49</sub>H<sub>66</sub>N<sub>4</sub>O<sub>7</sub>Si+Na<sup>+</sup>]: 873.4593, found: 873.4595; Enantiomeric excess was determined by HPLC with

a Daicel Chiralpak AD-H, *n*-Hexane/ *i*-PrOH = 80/20, rate = 0.8 mL/min,  $\lambda$  = 254 nm, *t* (minor) = 11.1 min, *t* (major) = 15.6 min, 97% ee;  $[\alpha]_D^{20}$  = -103.8 (*c* = 1.0, CHCl<sub>3</sub>).

**Methyl *N*-(2-isopropyl-6-((triisopropylsilyl)ethynyl)phenyl)-*N*-(5-nitropicolinoyl)glycylglycyl-*L*-valinate (5f)**

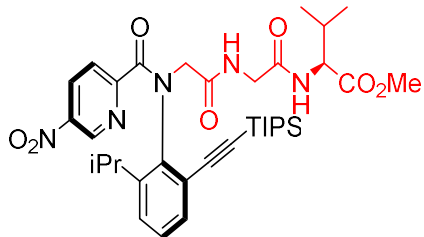

The title compound **5f** was prepared under the optimized conditions and purified by preparative TLC (petroleum ether: ethyl acetate = 2: 1). **5f** was obtained as a light yellow oil (34.7 mg, 50%, *E*: *Z* = 14: 1).

**<sup>1</sup>H NMR (400 MHz, CDCl<sub>3</sub>)**  $\delta$  8.96 (d, *J* = 2.5 Hz, 1H), 8.39 (dd, *J* = 8.7, 2.5 Hz, 1H), 8.05 (d, *J* = 8.6 Hz, 1H), 7.34 (t, *J* = 5.2 Hz, 1H), 7.27-7.24 (m, 1H), 7.19 (d, *J* = 4.8 Hz, 2H), 6.89 (d, *J* = 8.5 Hz, 1H), 4.87 (d, *J* = 15.1 Hz, 1H), 4.51 (dd, *J* = 8.2, 5.5 Hz, 1H), 4.16 (dd, *J* = 16.8, 6.1 Hz, 1H), 3.99-3.91 (m, 2H), 3.72 (s, 3H), 3.53-3.44 (m, 1H), 2.21-2.13 (m, 1H), 1.17-1.07 (m, 27H), 0.92 (dd, *J* = 10.2, 6.8 Hz, 6H); **<sup>13</sup>C NMR (101 MHz, CDCl<sub>3</sub>)**  $\delta$  172.18, 168.64, 168.16, 167.57, 156.97, 147.72, 144.00, 142.89, 141.55, 131.46, 131.31, 128.78, 127.82, 124.73, 122.07, 103.79, 96.92, 57.52, 56.02, 52.07, 43.29, 30.95, 28.27, 24.73, 23.05, 18.93, 18.66, 17.98, 11.36; **HRMS (ESI-TOF)** calcd for [C<sub>36</sub>H<sub>51</sub>N<sub>5</sub>O<sub>7</sub>Si+Na<sup>+</sup>]: 716.3450, found: 716.3449; Enantiomeric excess was determined by HPLC with a Daicel Chiralpak OD-H, *n*-Hexane/*i*-PrOH = 95/5, rate = 0.8 mL/min,  $\lambda$  = 254 nm, *t* (major) = 24.3 min, *t* (minor) = 41.5 min, 98% ee;  $[\alpha]_D^{20}$  = -73.6 (*c* = 1.0, CHCl<sub>3</sub>).

**Methyl *N*-(2-isopropyl-6-((triisopropylsilyl)ethynyl)phenyl)-*N*-(5-nitropicolinoyl)glycylglycyl-*L*-phenylalaninate (5g)**

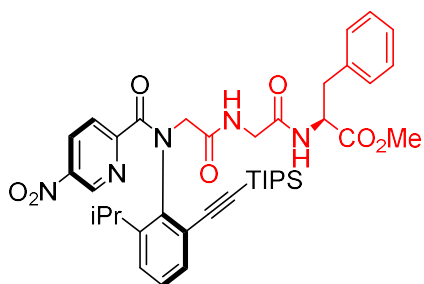

The title compound **5g** was prepared under the optimized conditions and purified by preparative TLC (petroleum ether: ethyl acetate = 2: 1). **5g** was obtained as a light yellow oil (34.8 mg, 47%, *E*: *Z* = 13: 1).

**<sup>1</sup>H NMR (400 MHz, CDCl<sub>3</sub>)**  $\delta$  8.98 (d, *J* = 2.5 Hz, 1H), 8.37 (dd, *J* = 8.6, 2.6 Hz, 1H), 7.99 (d, *J* = 8.6 Hz, 1H), 7.27-7.17 (m, 7H), 7.10 (d, *J* = 6.9 Hz, 2H), 6.84 (d, *J* = 7.8 Hz, 1H), 4.93 (d, *J* = 15.0 Hz, 1H), 4.84 (q, *J* = 6.7 Hz, 1H), 4.08 (dd, *J* = 16.8, 6.0 Hz, 1H), 3.94 (dd, *J* = 16.8, 5.3 Hz, 1H), 3.87 (d, *J* = 15.0 Hz, 1H), 3.69 (s, 3H), 3.53-3.46 (m, 1H), 3.17-3.07 (m, 2H), 1.16-1.08 (m, 27H); **<sup>13</sup>C NMR (101 MHz, CDCl<sub>3</sub>)**  $\delta$  171.81, 168.31, 168.16, 167.66, 157.00, 147.76, 143.98, 142.99, 141.48, 135.93, 131.44,

131.31, 129.23, 128.84, 128.55, 127.79, 127.07, 124.55, 122.16, 103.64, 96.90, 55.92, 53.56, 52.30, 43.19, 37.74, 28.24, 24.82, 23.03, 18.69, 11.38; **HRMS (ESI-TOF)** calcd for  $[C_{40}H_{51}N_5O_7Si+Na^+]$ : 764.3450, found: 764.3453; Enantiomeric excess was determined by HPLC with a Daicel Chiralpak OD-H, *n*-Hexane/*i*-PrOH = 80/20, rate = 0.8 mL/min,  $\lambda$  = 254 nm, *t* (major) = 8.8 min, *t* (minor) = 14.0 min, 97% ee;  $[\alpha]_D^{20}$  = -61.1 (*c* = 1.0, CHCl<sub>3</sub>).

**Methyl *N*-(2-methyl-6-((triisopropylsilyl)ethynyl)phenyl)-*N*-(5-nitropicolinoyl)glycylglycinate (5h)**

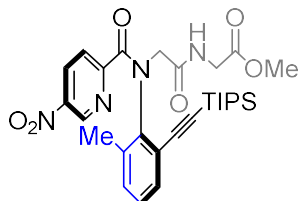

The title compound **5h** was prepared under the optimized conditions and purified by preparative TLC (petroleum ether: ethyl acetate = 2: 1). **5h** was obtained as a light yellow oil (40.1 mg, 71%, *E: Z* = 20: 1).

**<sup>1</sup>H NMR (400 MHz, CDCl<sub>3</sub>)**  $\delta$  9.05 (s, 1H), 8.36 (d, *J* = 8.6 Hz, 1H), 7.91 (d, *J* = 8.6 Hz, 1H), 7.43 (t, *J* = 5.7 Hz, 1H), 7.21 (dd, *J* = 6.5, 2.7 Hz, 1H), 7.10-7.05 (m, 2H), 5.11 (d, *J* = 14.7 Hz, 1H), 4.10 (dd, *J* = 8.3, 5.6 Hz, 2H), 3.83 (d, *J* = 14.7 Hz, 1H), 3.75 (s, 3H), 2.35 (s, 3H), 1.12 (s, 21H); **<sup>13</sup>C NMR (101 MHz, CDCl<sub>3</sub>)**  $\delta$  169.90, 168.41, 167.87, 157.58, 143.98, 143.51, 142.80, 137.83, 131.65, 131.62, 131.27, 128.50, 123.65, 122.39, 103.13, 97.42, 54.91, 52.37, 41.31, 18.67, 18.56, 11.34; **HRMS (ESI-TOF)** calcd for  $[C_{29}H_{38}N_4O_6Si+Na^+]$ : 589.2453, found: 589.2455; Enantiomeric excess was determined by HPLC with a Daicel Chiralpak OD-H, *n*-Hexane/*i*-PrOH = 80/20, rate = 0.8 mL/min,  $\lambda$  = 254 nm, *t* (major) = 13.2 min, *t* (minor) = 16.5 min, 87% ee;  $[\alpha]_D^{20}$  = -107.0 (*c* = 1.0, CHCl<sub>3</sub>).

**Methyl *N*-(4-iodo-2-methyl-6-((triisopropylsilyl)ethynyl)phenyl)-*N*-(5-nitropicolinoyl)glycylglycinate (5i)**

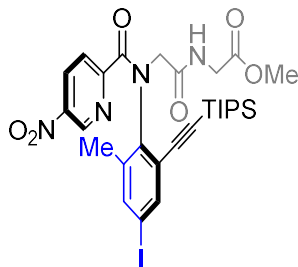

The title compound **5i** was prepared under the optimized conditions and purified by preparative TLC (petroleum ether: ethyl acetate = 1: 1). **5i** was obtained as a light yellow oil (26.3 mg, 38%, *E: Z* = 17: 1).

**<sup>1</sup>H NMR (400 MHz, CDCl<sub>3</sub>)**  $\delta$  9.06 (d, *J* = 2.4 Hz, 1H), 8.41 (dd, *J* = 8.6, 2.6 Hz, 1H), 7.96 (d, *J* = 8.6 Hz, 1H), 7.52 (d, *J* = 1.8 Hz, 1H), 7.47 (d, *J* = 1.3 Hz, 1H), 7.29 (t, *J* = 5.2 Hz, 1H), 5.07 (d, *J* = 14.8 Hz, 1H), 4.13 (dd, *J* = 18.2, 5.5 Hz, 1H), 4.05 (dd, *J* = 18.2, 5.3 Hz, 1H), 3.76 (d, *J* = 14.6 Hz, 1H), 3.75 (s, 3H), 2.32 (s, 3H), 1.10 (s, 21H); **<sup>13</sup>C NMR (101 MHz, CDCl<sub>3</sub>)**  $\delta$  169.87, 168.07, 167.44, 157.07, 144.16, 143.47, 143.03, 140.35, 139.86, 139.85, 131.49, 124.13, 124.06, 101.35, 98.98, 93.49, 54.82, 52.40, 41.29, 18.66, 18.27, 11.31; **HRMS (ESI-TOF)** calcd for  $[C_{29}H_{37}IN_4O_6Si+Na^+]$ : 715.1419, found: 715.1419; Enantiomeric excess was determined by HPLC with a Daicel Chiralpak OD-H, *n*-Hexane/*i*-



PrOH = 80/20, rate = 0.8 mL/min,  $\lambda$  = 254 nm, t (major) = 16.9 min, t (minor) = 32.5 min, 83% ee;  $[\alpha]_D^{20}$  = -69.1 (c = 1.0, CHCl<sub>3</sub>).

**Methyl** *N*-(4-methoxy-2-methyl-6-((triisopropylsilyl)ethynyl)phenyl)-*N*-(5-nitropicolinoyl)glycylglycinate (**5j**)

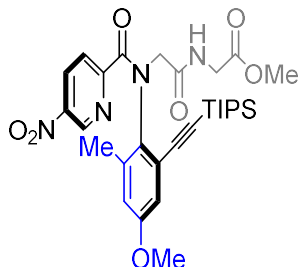

The title compound **5j** was prepared under the optimized conditions and purified by preparative TLC (petroleum ether: ethyl acetate = 1: 1). **5j** was obtained as a light yellow oil (47.1 mg, 79%, *E*: *Z* = 25: 1).

**<sup>1</sup>H NMR (400 MHz, CDCl<sub>3</sub>)**  $\delta$  9.12 (d, *J* = 2.5 Hz, 1H), 8.36 (dd, *J* = 8.6, 2.5 Hz, 1H), 7.86 (d, *J* = 8.5 Hz, 1H), 7.45 (t, *J* = 5.5 Hz, 1H), 6.70 (d, *J* = 2.9 Hz, 1H), 6.60 (d, *J* = 2.9 Hz, 1H), 5.11 (d, *J* = 14.6 Hz, 1H), 4.10 (t, *J* = 6.3 Hz, 2H), 3.79 (d, *J* = 14.8 Hz, 1H), 3.76 (s, 3H), 3.72 (s, 3H), 2.30 (s, 3H), 1.13 (s, 21H); **<sup>13</sup>C NMR (101 MHz, CDCl<sub>3</sub>)**  $\delta$  169.87, 168.51, 168.26, 158.70, 157.99, 143.88, 143.71, 139.23, 135.87, 131.23, 123.25, 117.26, 116.02, 103.06, 97.25, 55.43, 55.18, 52.36, 41.30, 18.87, 18.68, 11.36; **HRMS (ESI-TOF)** calcd for [C<sub>30</sub>H<sub>40</sub>N<sub>4</sub>O<sub>7</sub>Si+Na<sup>+</sup>]: 619.2558, found: 619.2559; Enantiomeric excess was determined by HPLC with a Daicel Chiralpak OD-H, *n*-Hexane/*i*-PrOH = 80/20, rate = 1.0 mL/min,  $\lambda$  = 254 nm, t (major) = 12.7 min, t (minor) = 16.3 min, 94% ee;  $[\alpha]_D^{20}$  = -178.6 (c = 1.0, CHCl<sub>3</sub>).

**Methyl** *N*-(4-hydroxy-2-methyl-6-((triisopropylsilyl)ethynyl)phenyl)-*N*-(5-nitropicolinoyl)glycylglycinate (**5k**)

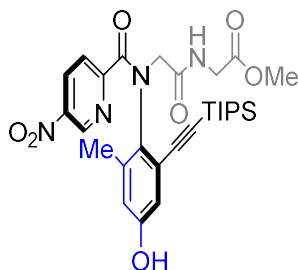

The title compound **5k** was prepared under the optimized conditions and purified by preparative TLC (petroleum ether: ethyl acetate = 1: 1). **5k** was obtained as a yellow oil (34.3 mg, 59%, *E*: *Z* = 10: 1).

**<sup>1</sup>H NMR (400 MHz, CDCl<sub>3</sub>)**  $\delta$  9.16 (d, *J* = 2.4 Hz, 1H), 8.30 (dd, *J* = 8.6, 2.6 Hz, 1H), 7.96 (s, 1H), 7.85 (t, *J* = 5.6 Hz, 1H), 7.73 (d, *J* = 8.6 Hz, 1H), 6.59 (d, *J* = 2.8 Hz, 1H), 6.20 (d, *J* = 2.8 Hz, 1H), 5.11 (d, *J* = 14.2 Hz, 1H), 4.09 (d, *J* = 5.6 Hz, 2H), 3.94 (d, *J* = 14.2 Hz, 1H), 3.77 (s, 3H), 2.06 (s, 3H), 1.12 (s, 21H); **<sup>13</sup>C NMR (101 MHz, CDCl<sub>3</sub>)**  $\delta$  170.08, 169.38, 168.43, 157.63, 156.12, 144.14, 143.93, 138.08, 133.85, 131.24, 122.99, 122.95, 118.51, 118.02, 103.05, 97.39, 54.38, 52.54, 41.43, 18.69, 18.36, 11.32; **HRMS (ESI-TOF)** calcd for [C<sub>29</sub>H<sub>38</sub>N<sub>4</sub>O<sub>7</sub>Si+Na<sup>+</sup>]: 605.2402, found: 605.2401; Enantiomeric excess was determined by HPLC with a Daicel Chiralpak AD-H, *n*-Hexane/*i*-PrOH = 80/20, rate = 0.8 mL/min,  $\lambda$  = 254 nm, t (minor) = 9.6 min, t (major) = 16.5 min, 94% ee;  $[\alpha]_D^{20}$  = -174.5 (c = 1.0, CHCl<sub>3</sub>).

**Methyl 6-((2-((2-methoxy-2-oxoethyl)amino)-2-oxoethyl)(2-((triisopropylsilyl)ethynyl)-5,6,7,8-tetrahydronaphthalen-1-yl)carbamoyl)nicotinate (5l)**

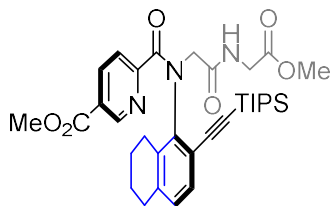

The title compound **5l** was prepared under the optimized conditions and purified by preparative TLC (petroleum ether: ethyl acetate = 2: 1). **5l** was obtained as a light yellow oil (61.3 mg, 99%, *E*: *Z* = 11: 1).

**<sup>1</sup>H NMR (400 MHz, CDCl<sub>3</sub>)** δ 8.85 (d, *J* = 2.0 Hz, 1H), 8.13 (dd, *J* = 8.1, 2.1 Hz, 1H), 7.72 (d, *J* = 8.2 Hz, 1H), 7.63 (t, *J* = 5.6 Hz, 1H), 7.07 (d, *J* = 7.9 Hz, 1H), 6.84 (d, *J* = 7.9 Hz, 1H), 5.09 (d, *J* = 14.7 Hz, 1H), 4.08 (dd, *J* = 5.5, 2.0 Hz, 2H), 3.87 (s, 3H), 3.78 (d, *J* = 14.7 Hz, 1H), 3.73 (s, 3H), 2.95-2.88 (m, 1H), 2.69-2.57 (m, 3H), 1.79-1.56 (m, 4H), 1.10 (s, 21H); **<sup>13</sup>C NMR (101 MHz, CDCl<sub>3</sub>)** δ 169.82, 169.21, 168.96, 165.11, 156.18, 149.31, 142.89, 140.07, 137.04, 130.29, 129.28, 126.32, 122.50, 119.38, 103.63, 96.11, 54.97, 52.49, 52.27, 41.32, 29.63, 25.48, 22.50, 22.21, 18.67, 11.36; **HRMS (ESI-TOF)** calcd for [C<sub>34</sub>H<sub>45</sub>N<sub>3</sub>O<sub>6</sub>Si+Na<sup>+</sup>]: 642.2970, found: 642.2971; Enantiomeric excess was determined by HPLC with a Daicel Chiralpak OD-H, *n*-Hexane/*i*-PrOH = 80/20, rate = 0.8 mL/min, λ = 254 nm, *t* (major) = 6.9 min, *t* (minor) = 9.0 min, 87% ee; [α]<sub>D</sub><sup>20</sup> = -100.7 (c = 1.0, CHCl<sub>3</sub>).

**Methyl 6-((2-ethyl-6-((triisopropylsilyl)ethynyl)phenyl)(2-((2-methoxy-2-oxoethyl)amino)-2-oxoethyl)carbamoyl)nicotinate (5m)**

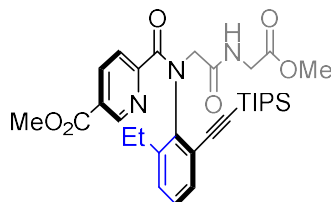

The title compound **5m** was prepared under the optimized conditions and purified by preparative TLC (petroleum ether: ethyl acetate = 2: 1). **5m** was obtained as a light yellow oil (54.0 mg, 91%, *E*: *Z* = 8: 1).

**<sup>1</sup>H NMR (400 MHz, CDCl<sub>3</sub>)** δ 8.84 (dd, *J* = 2.1, 0.8 Hz, 1H), 8.14 (dd, *J* = 8.1, 2.1 Hz, 1H), 7.73 (dd, *J* = 8.2, 0.9 Hz, 1H), 7.59 (t, *J* = 5.5 Hz, 1H), 7.24-7.19 (m, 1H), 7.14-7.08 (m, 2H), 5.14 (d, *J* = 14.7 Hz, 1H), 4.09 (d, *J* = 5.6 Hz, 2H), 3.87 (s, 3H), 3.82 (d, *J* = 15.0 Hz, 1H), 3.75 (s, 3H), 2.72-2.64 (m, 2H), 1.13-1.09 (m, 24H); **<sup>13</sup>C NMR (101 MHz, CDCl<sub>3</sub>)** δ 169.85, 169.10, 168.74, 165.06, 155.93, 149.29, 142.97, 142.51, 137.07, 131.30, 129.07, 128.31, 126.32, 122.74, 122.27, 103.48, 97.00, 55.34, 52.49, 52.30, 41.27, 23.57, 18.67, 13.77, 11.35; **HRMS (ESI-TOF)** calcd for [C<sub>32</sub>H<sub>43</sub>N<sub>3</sub>O<sub>6</sub>Si+Na<sup>+</sup>]: 616.2813, found: 616.2815; Enantiomeric excess was determined by HPLC with a Daicel Chiralpak AD-H, *n*-Hexane/*i*-PrOH = 80/20, rate = 0.8 mL/min, λ = 254 nm, *t* (minor) = 6.9 min, *t* (major) = 12.5 min, 94% ee; [α]<sub>D</sub><sup>20</sup> = -172.5 (c = 1.0, CHCl<sub>3</sub>).

**Methyl 6-((2-bromo-4-methoxy-6-((triisopropylsilyl)ethynyl)phenyl)(2-((2-methoxy-2-oxoethyl)amino)-2-oxoethyl)carbamoyl)nicotinate (5n)**

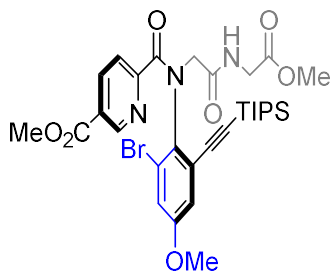

The title compound **5n** was prepared under the optimized conditions and purified by preparative TLC (petroleum ether: ethyl acetate = 2: 1). **5n** was obtained as a light yellow oil (21.5 mg, 32%, *E*: *Z* = 6: 1). <sup>1</sup>H NMR (400 MHz, CDCl<sub>3</sub>) δ 8.87 (d, *J* = 2.0 Hz, 1H), 8.22 (dd, *J* = 8.2, 2.1 Hz, 1H), 7.89 (d, *J* = 8.1 Hz, 1H), 7.64 (t, *J* = 5.5 Hz, 1H), 6.94 (d, *J* = 2.8 Hz, 1H), 6.88 (d, *J* = 2.8 Hz, 1H), 5.03 (d, *J* = 14.8 Hz, 1H), 4.14 (dd, *J* = 18.2, 5.6 Hz, 1H), 4.03 (dd, *J* = 18.2, 5.2 Hz, 1H), 3.94-3.90 (m, 4H), 3.75 (s, 6H), 1.09 (s, 21H); <sup>13</sup>C NMR (101 MHz, CDCl<sub>3</sub>) δ 169.95, 168.61, 168.16, 165.16, 158.73, 155.34, 149.17, 137.17, 136.53, 126.57, 124.88, 124.43, 123.71, 119.05, 118.22, 102.20, 98.79, 55.80, 55.11, 52.54, 52.29, 41.44, 18.62, 11.29; **HRMS (ESI-TOF)** calcd for [C<sub>31</sub>H<sub>40</sub>BrN<sub>3</sub>O<sub>7</sub>Si+Na<sup>+</sup>]: 696.1711, found: 696.1710; Enantiomeric excess was determined by HPLC with a Daicel Chiralpak AD-H, *n*-Hexane/*i*-PrOH = 80/20, rate = 0.8 mL/min, λ = 254 nm, *t* (minor) = 11.9 min, *t* (major) = 15.0 min, 90% ee; [α]<sub>D</sub><sup>20</sup> = -96.8 (c = 0.5, CHCl<sub>3</sub>).

**Methyl 6-((2-iodo-4-methoxy-6-((triisopropylsilyl)ethynyl)phenyl)(2-((2-methoxy-2-oxoethyl)amino)-2-oxoethyl)carbamoyl)nicotinate (5o)**

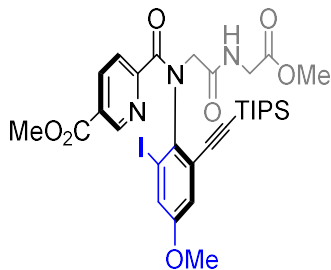

The title compound **5o** was prepared under the optimized conditions and purified by preparative TLC (petroleum ether: ethyl acetate = 2: 1). **5o** was obtained as a light brown oil (29.6 mg, 41%, *E*: *Z* = 5: 1). <sup>1</sup>H NMR (400 MHz, CDCl<sub>3</sub>) δ 8.87 (dd, *J* = 2.1, 0.8 Hz, 1H), 8.23 (dd, *J* = 8.1, 2.1 Hz, 1H), 7.93 (dd, *J* = 8.2, 0.9 Hz, 1H), 7.74 (t, *J* = 5.3 Hz, 1H), 7.19 (d, *J* = 2.9 Hz, 1H), 6.92 (d, *J* = 2.8 Hz, 1H), 5.02 (d, *J* = 14.6 Hz, 1H), 4.19 (dd, *J* = 18.1, 5.6 Hz, 1H), 4.02 (dd, *J* = 18.2, 4.9 Hz, 1H), 3.91 (d, *J* = 14.6 Hz, 1H), 3.91 (s, 3H), 3.75 (s, 3H), 3.74 (s, 3H), 1.08 (s, 21H); <sup>13</sup>C NMR (101 MHz, CDCl<sub>3</sub>) δ 169.95, 168.45, 168.10, 165.18, 158.45, 155.33, 149.03, 140.05, 137.13, 126.54, 125.46, 124.06, 124.01, 119.07, 102.50, 100.57, 98.49, 55.76, 55.58, 52.54, 52.30, 41.54, 18.62, 11.30; **HRMS (ESI-TOF)** calcd for [C<sub>31</sub>H<sub>40</sub>IN<sub>3</sub>O<sub>7</sub>Si+Na<sup>+</sup>]: 744.1572, found: 744.1573; Enantiomeric excess was determined by HPLC with a Daicel Chiralpak OD-H, *n*-Hexane/*i*-PrOH = 95/5, rate = 0.8 mL/min, λ = 254 nm, *t* (major) = 56.3 min, *t* (minor) = 77.2 min, 96% ee; [α]<sub>D</sub><sup>20</sup> = -95.8 (c = 1.0, CHCl<sub>3</sub>).

**Methyl 6-((2-(2-hydroxyethyl)-6-((triisopropylsilyl)ethynyl)phenyl)(2-((2-methoxy-2-oxoethyl)amino)-2-oxoethyl)carbamoyl)nicotinate (5p)**

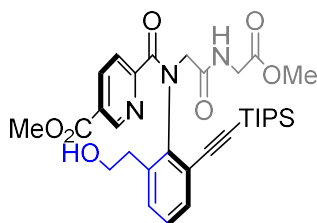

The title compound **5p** was prepared under the optimized conditions and purified by preparative TLC (ethyl acetate: dichloromethane = 1: 1). **5p** was obtained as a light yellow oil (23.1 mg, 38%, *E: Z* = 33: 1).

**<sup>1</sup>H NMR (400 MHz, CDCl<sub>3</sub>)** δ 8.69 (d, *J* = 2.0 Hz, 1H), 8.49 (t, *J* = 6.3 Hz, 1H), 8.27 (dd, *J* = 8.2, 2.0 Hz, 1H), 7.99 (d, *J* = 8.2 Hz, 1H), 7.23 (dd, *J* = 6.6, 2.7 Hz, 1H), 7.13-7.08 (m, 2H), 5.50 (s, 1H), 5.01 (d, *J* = 16.0 Hz, 1H), 4.38 (dd, *J* = 17.8, 6.8 Hz, 1H), 4.05-3.98 (m, 2H), 3.89 (s, 3H), 3.88-3.80 (m, 2H), 3.74 (s, 3H), 3.39-3.32 (m, 1H), 2.86 (dt, *J* = 14.8, 4.1 Hz, 1H), 1.15-1.10 (m, 21H); **<sup>13</sup>C NMR (101 MHz, CDCl<sub>3</sub>)** δ 170.41, 169.01, 168.63, 164.65, 156.10, 147.70, 143.85, 139.04, 137.92, 132.32, 131.73, 128.47, 126.65, 125.20, 123.07, 103.17, 97.27, 63.77, 55.10, 52.65, 52.23, 41.11, 35.75, 18.68, 18.65, 11.42; **HRMS (ESI-TOF)** calcd for [C<sub>32</sub>H<sub>43</sub>N<sub>3</sub>O<sub>7</sub>Si+Na<sup>+</sup>]: 632.2762, found: 632.2759; Enantiomeric excess was determined by HPLC with a Daicel Chiralpak AS-H, *n*-Hexane/*i*-PrOH = 80/20, rate = 0.8 mL/min, λ = 254 nm, t (major) = 9.2 min, t (minor) = 16.0 min, 99% ee; [α]<sub>D</sub><sup>20</sup> = -23.7 (c = 1.0, CHCl<sub>3</sub>).

**Methyl 6-((4-fluorobenzyl)(2-isopropyl-6-((triisopropylsilyl)ethynyl)phenyl)carbamoyl)nicotinate (5q)**

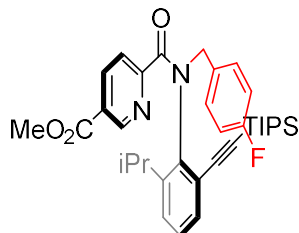

The title compound **5q** was prepared under the optimized conditions and purified by preparative TLC (petroleum ether: ethyl acetate = 4: 1). **5q** was obtained as a light yellow oil (51.6 mg, 88%, *E: Z* = 11: 1).

**<sup>1</sup>H NMR (400 MHz, CDCl<sub>3</sub>)** δ 8.93 (d, *J* = 2.0 Hz, 1H), 8.10 (dd, *J* = 8.2, 2.2 Hz, 1H), 7.69 (d, *J* = 8.2 Hz, 1H), 7.35-7.30 (m, 3H), 7.13 (t, *J* = 7.8 Hz, 1H), 7.01 (dd, *J* = 8.0, 1.6 Hz, 1H), 6.92 (t, *J* = 8.6 Hz, 2H), 5.72 (d, *J* = 14.2 Hz, 1H), 4.58 (d, *J* = 14.2 Hz, 1H), 3.88 (s, 3H), 2.78-2.72 (m, 1H), 1.12 (s, 21H), 0.61 (d, *J* = 6.7 Hz, 3H), 0.37 (d, *J* = 6.7 Hz, 3H); **<sup>13</sup>C NMR (101 MHz, CDCl<sub>3</sub>)** δ 166.42 (d, *J*<sub>CF</sub> = 254.8 Hz), 165.19, 163.75, 161.30, 156.73, 149.50, 147.84, 140.40, 136.98, 132.64 (d, *J*<sub>CF</sub> = 4.0 Hz), 131.93 (d, *J*<sub>CF</sub> = 8.1 Hz), 131.52, 128.15, 127.50, 126.02, 122.90, 122.87, 115.25 (d, *J*<sub>CF</sub> = 21.2 Hz), 104.14, 96.96, 53.07, 52.46, 28.04, 23.60, 23.30, 18.69, 18.68, 11.35; **<sup>19</sup>F NMR (376 MHz, CDCl<sub>3</sub>)** δ -114.70; **HRMS (ESI-TOF)** calcd for [C<sub>35</sub>H<sub>43</sub>FN<sub>2</sub>O<sub>3</sub>Si+H<sup>+</sup>]: 587.3100, found: 587.3102; Enantiomeric excess was determined by HPLC with a Daicel Chiralpak AD-H, *n*-Hexane/*i*-PrOH = 90/10, rate = 0.8 mL/min, λ = 254 nm, t (major) = 7.2 min, t (minor) = 9.7 min, 92% ee; [α]<sub>D</sub><sup>20</sup> = -91.0 (c = 0.28, CHCl<sub>3</sub>).

**Methyl 6-((2-isopropyl-6-((triisopropylsilyl)ethynyl)phenyl)(4-**

**methoxybenzyl)carbamoyl)nicotinate (5r)**

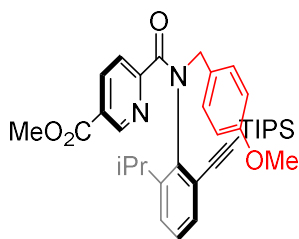

The title compound **5r** was prepared under the optimized conditions and purified by preparative TLC (petroleum ether: ethyl acetate = 10: 1). **5r** was obtained as a light yellow oil (44.3 mg, 74%, *E: Z* = 9: 1).

**<sup>1</sup>H NMR (400 MHz, CDCl<sub>3</sub>)** δ 8.95 (dd, *J* = 2.1, 0.9 Hz, 1H), 8.09 (dd, *J* = 8.2, 2.1 Hz, 1H), 7.67 (dd, *J* = 8.2, 0.9 Hz, 1H), 7.31 (dd, *J* = 7.5, 1.6 Hz, 1H), 7.26 (t, *J* = 4.6 Hz, 2H), 7.12 (t, *J* = 7.8 Hz, 1H), 6.99 (dd, *J* = 8.0, 1.6 Hz, 1H), 6.76 (d, *J* = 8.6 Hz, 2H), 5.74 (d, *J* = 14.2 Hz, 1H), 4.54 (d, *J* = 14.1 Hz, 1H), 3.88 (s, 3H), 3.75 (s, 3H), 2.78-2.71 (m, 1H), 1.12 (s, 21H), 0.57 (d, *J* = 6.8 Hz, 3H), 0.33 (d, *J* = 6.7 Hz, 3H); **<sup>13</sup>C NMR (101 MHz, CDCl<sub>3</sub>)** δ 167.48, 165.24, 159.27, 156.96, 149.55, 147.99, 140.50, 136.92, 131.50, 131.42, 128.97, 128.02, 127.45, 125.91, 122.90, 122.82, 113.78, 104.27, 96.82, 55.26, 53.11, 52.43, 28.02, 23.57, 23.36, 18.71, 18.69, 11.37; **HRMS (ESI-TOF)** calcd for [C<sub>36</sub>H<sub>46</sub>N<sub>2</sub>O<sub>4</sub>Si+Na<sup>+</sup>]: 621.3119, found: 621.3122; Enantiomeric excess was determined by HPLC with a Daicel Chiralpak AD-H, *n*-Hexane/*i*-PrOH = 80/20, rate = 0.8 mL/min, λ = 254 nm, *t* (major) = 6.8 min, *t* (minor) = 12.8 min, 91% ee; [α]<sub>D</sub><sup>20</sup> = -128.2 (c = 1.0, CHCl<sub>3</sub>).

**Methyl 6-((2-isopropyl-6-((triisopropylsilyl)ethynyl)phenyl)(4-nitrobenzyl)carbamoyl)nicotinate (5s)**

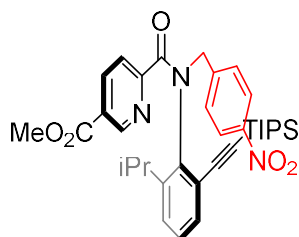

The title compound **5s** was prepared under the optimized conditions and purified by preparative TLC (petroleum ether: ethyl acetate = 10: 1). **5s** was obtained as a light yellow oil (53.3 mg, 87%, *E: Z* = 14: 1).

**<sup>1</sup>H NMR (400 MHz, CDCl<sub>3</sub>)** δ 8.87 (d, *J* = 1.4 Hz, 1H), 8.16-8.11 (m, 3H), 7.77 (d, *J* = 8.2 Hz, 1H), 7.57 (d, *J* = 8.6 Hz, 2H), 7.26 (dd, *J* = 7.4, 1.6 Hz, 1H), 7.15 (t, *J* = 7.8 Hz, 1H), 7.09 (dd, *J* = 7.9, 1.6 Hz, 1H), 5.61 (d, *J* = 14.4 Hz, 1H), 4.78 (d, *J* = 14.5 Hz, 1H), 3.89 (s, 3H), 2.91-2.85 (m, 1H), 1.09 (s, 21H), 0.78 (d, *J* = 6.7 Hz, 3H), 0.51 (d, *J* = 6.8 Hz, 3H); **<sup>13</sup>C NMR (101 MHz, CDCl<sub>3</sub>)** δ 168.05, 165.13, 156.31, 149.20, 147.51, 144.09, 140.56, 137.13, 131.70, 130.88, 128.38, 127.61, 126.26, 123.59, 123.27, 122.82, 103.93, 97.04, 53.55, 52.50, 28.19, 23.90, 23.23, 18.66, 18.63, 11.33; **HRMS (ESI-TOF)** calcd for [C<sub>35</sub>H<sub>43</sub>N<sub>3</sub>O<sub>5</sub>Si+Na<sup>+</sup>]: 636.2864, found: 636.2864; Enantiomeric excess was determined by HPLC with a Daicel Chiralpak AD-H, *n*-Hexane/*i*-PrOH = 90/10, rate = 0.8 mL/min, λ = 254 nm, *t* (major) = 9.8 min, *t* (minor) = 21.3 min, 91% ee; [α]<sub>D</sub><sup>20</sup> = -82.0 (c = 1.0, CHCl<sub>3</sub>).

## 2.3.2 Limitation of the Scope of Substrate and Alkyne

**Table S9. Limitation of substrate scope<sup>a</sup>**

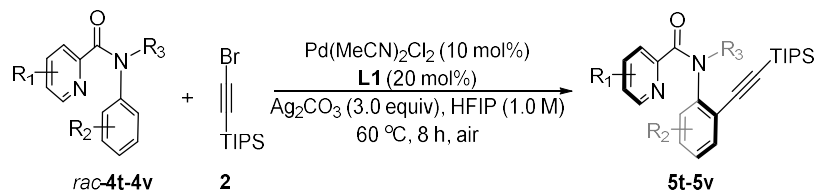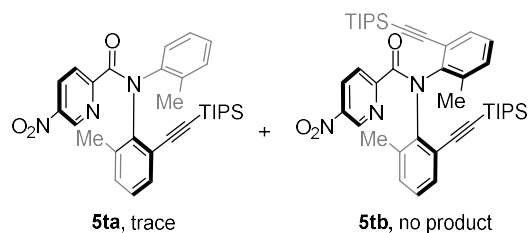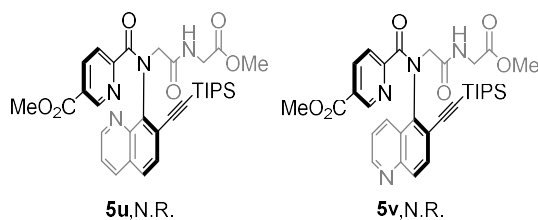

<sup>a</sup>Standard conditions: *rac*-**4** (0.1 mmol, 1.0 equiv), **2** (4.0 equiv), Pd(MeCN)<sub>2</sub>Cl<sub>2</sub> (0.1 equiv), **L1** (0.2 equiv), Ag<sub>2</sub>CO<sub>3</sub> (3.0 equiv), HFIP (0.1 mL, 1.0 M), 60 °C, 8 h, air.

**Table S10. Limitation of alkynes scope<sup>a</sup>**

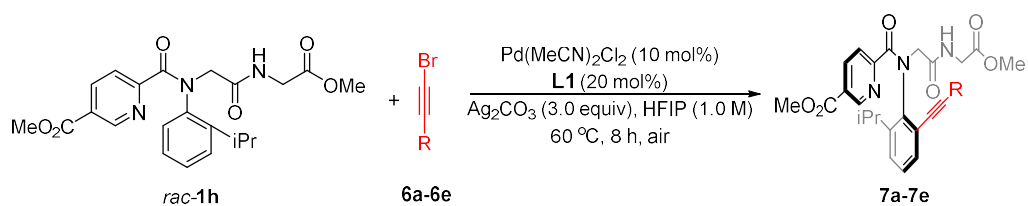

Failed alkyne reagents:

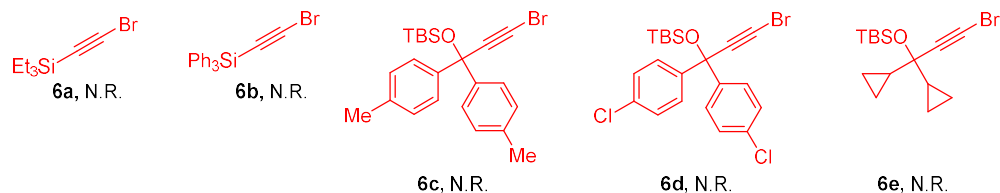

<sup>a</sup>Standard conditions: *rac*-**1h** (0.1 mmol, 1.0 equiv), **6** (4.0 equiv), Pd(MeCN)<sub>2</sub>Cl<sub>2</sub> (0.1 equiv), **L1** (0.2 equiv), Ag<sub>2</sub>CO<sub>3</sub> (3.0 equiv), HFIP (0.1 mL, 1.0 M), 60 °C, 8 h, air.

## 2.4 Gram-Scale Synthesis and Transformations

### 2.4.1 Gram-scale synthesis of **3h**

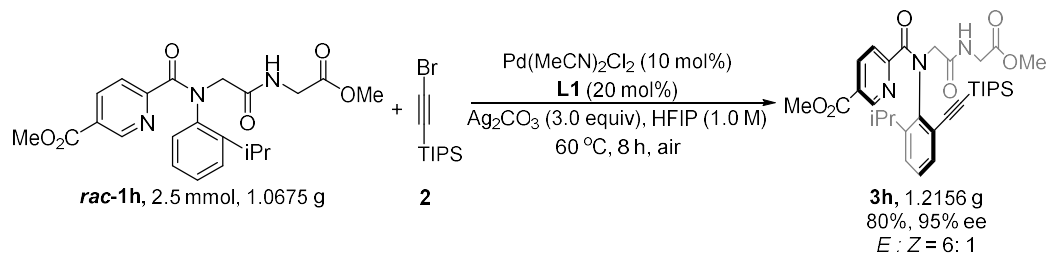

To an oven-dried 50 mL screw-capped vial was added **rac-1h** (2.5 mmol, 1.07 g, 1.0 equiv), protected alkynyl bromide **2** (4.0 equiv), Pd(MeCN)<sub>2</sub>Cl<sub>2</sub> (65 mg, 0.1 equiv), **L1** (65 mg, 0.2 equiv), Ag<sub>2</sub>CO<sub>3</sub> (2.07 g, 3.0 equiv), HFIP (2.5 mL). The mixture was then stirred for 8 h at 60 °C under air followed by cooling. The resulting mixture was filtered through a celite pad and concentrated in vacuo. The residue was purified by silica gel column chromatography to afford the desired product **3h** (1.22 g, 80% yield, 95% ee, *E*:*Z* = 6:1).

### 2.4.2 Transformations

#### a) Oxidation of **3h**

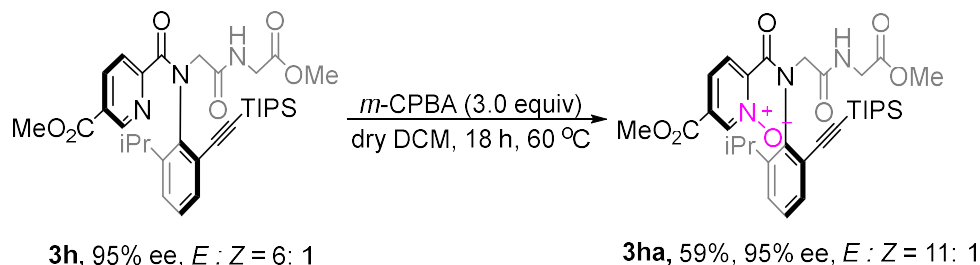

To an oven-dried 10 mL screw-capped vial containing a stirring bar was added **3h** (0.20 mmol), *m*-CPBA (3.0 equiv), anhydrous DCM (3.0 mL). The mixture was then stirred for 18 h at 60 °C followed by cooling. The resulting mixture was filtered through a celite pad and concentrated in vacuo. The residue was purified by preparative TLC (petroleum ether: ethyl acetate: triethylamine = 1: 1: 1%) to give **3ha** as a brown oil (73.6 mg, 59%, *E*:*Z* = 11: 1).

#### 2-((2-isopropyl-6-((triisopropylsilyl)ethynyl)phenyl)(2-((2-methoxy-2-oxoethyl)amino)-2-oxoethyl)carbamoyl)-5-(methoxycarbonyl)pyridine 1-oxide (**3ha**)

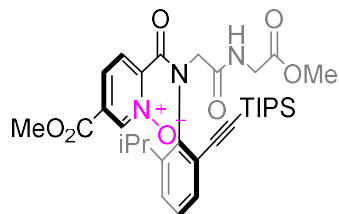

The title compound **3ha** was purified by preparative TLC (petroleum ether: ethyl acetate: triethylamine = 1: 1: 1%). **3ha** was obtained as a brown oil (73.6 mg, 59%, *E*:*Z* = 11: 1).

<sup>1</sup>H NMR (400 MHz, CDCl<sub>3</sub>) δ 8.63 (s, 1H), 8.31 (t, *J* = 5.7 Hz, 1H), 7.66-7.60 (m, 2H), 7.28 (dd, *J* = 7.1, 1.9 Hz, 1H), 7.22-7.14 (m, 2H), 5.22 (d, *J* = 16.5 Hz, 1H), 4.34 (dd, *J* = 17.8, 6.4 Hz, 1H), 4.00 (dd, *J* = 17.8, 5.1 Hz, 1H), 3.88 (s, 3H), 3.75 (s, 3H), 3.74-3.67 (m, 2H), 1.16-1.10 (m, 21H), 1.06 (t, *J* = 6.4 Hz, 6H); <sup>13</sup>C NMR (101 MHz, CDCl<sub>3</sub>) δ 169.73, 167.68, 163.14, 162.71, 149.44, 146.99, 139.98, 139.51, 131.64, 129.71, 129.39, 128.36, 125.75, 123.78, 123.46, 103.10, 98.52, 53.88, 53.16, 52.19, 41.38, 28.06, 25.34, 23.57, 18.68, 18.65, 11.36; **HRMS (ESI-TOF)** calcd for [C<sub>33</sub>H<sub>45</sub>N<sub>3</sub>O<sub>7</sub>Si + Na<sup>+</sup>]: 646.2919, found: 646.2919; Enantiomeric excess was determined by HPLC with a Daicel Chiralpak OD-H, *n*-Hexane/*i*-PrOH = 80/20, rate = 0.8 mL/min, λ = 254 nm, *t* (major) = 8.5 min, *t* (minor) = 14.2 min, 95% ee; [α]<sub>D</sub><sup>20</sup> = -391.3 (*c* = 0.5, CHCl<sub>3</sub>).

#### b) Removal of TIPS of **3h**

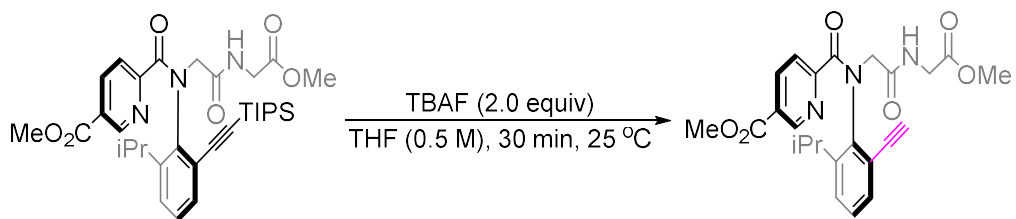

**3h**, 95% ee, *E* : *Z* = 6 : 1

**3hb**, 92%, 95% ee, *E* : *Z* = 10 : 1

TBAF (1 M in THF) (2.0 equiv) was added dropwise into a solution of **3h** (4.1 mmol, 1.0 equiv) in THF (0.5 M). After being stirred for 30 min at 25 °C, the resulting mixture was filtered through a celite pad and concentrated in vacuo. The residue was purified by silica gel column chromatography (petroleum ether: ethyl acetate: triethylamine = 1 : 1 : 1%) to afford the product **3hb** as a white foam (1.7011 g, 92%, *E* : *Z* = 10 : 1).

#### Methyl6-((2-ethynyl-6-isopropylphenyl)(2-((2-methoxy-2-oxoethyl)amino)-2-oxoethyl)carbamoyl)nicotinate (**3hb**)

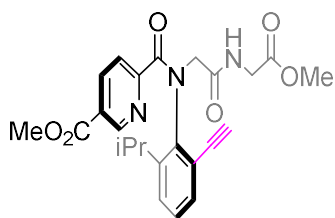

The title compound **3hb** was purified by silica gel column chromatography (petroleum ether: ethyl acetate: triethylamine = 1 : 1 : 1%). **3hb** was obtained as a white foam (1.7011 g, 92%, *E* : *Z* = 10 : 1).

<sup>1</sup>H NMR (400 MHz, CDCl<sub>3</sub>) δ 8.75 (dd, *J* = 2.1, 0.8 Hz, 1H), 8.20 (dd, *J* = 8.2, 2.1 Hz, 1H), 7.84 (dd, *J* = 8.2, 0.9 Hz, 1H), 7.62 (t, *J* = 5.3 Hz, 1H), 7.26-7.22 (m, 1H), 7.14 (d, *J* = 4.5 Hz, 2H), 4.57 (d, *J* = 14.9 Hz, 1H), 4.28 (d, *J* = 14.9 Hz, 1H), 4.14 (dd, *J* = 18.2, 5.6 Hz, 1H), 4.04 (dd, *J* = 18.2, 5.2 Hz, 1H), 3.85 (s, 3H), 3.73 (s, 3H), 3.33-3.26 (m, 1H), 3.24 (s, 1H), 1.16 (d, *J* = 6.8 Hz, 3H), 1.08 (d, *J* = 6.7 Hz, 3H); <sup>13</sup>C NMR (101 MHz, CDCl<sub>3</sub>) δ 170.00, 169.25, 168.26, 165.03, 155.79, 148.64, 147.37, 142.41, 137.33, 130.82, 128.54, 128.22, 126.40, 123.76, 120.92, 82.31, 80.95, 55.85, 52.50, 52.30, 41.35, 28.43, 24.63, 23.07; **HRMS (ESI-TOF)** calcd for [C<sub>24</sub>H<sub>25</sub>N<sub>3</sub>O<sub>6</sub>+Na<sup>+</sup>]: 474.1635, found: 474.1637; Enantiomeric excess was determined by HPLC with a Daicel Chiralpak AD-H, *n*-Hexane/*i*-PrOH = 80/20, rate = 0.8 mL/min, λ = 254 nm, *t* (major) = 29.7 min, *t* (minor) = 43.4 min, 95% ee; [α]<sub>D</sub><sup>20</sup> = -44.8 (*c* = 0.5, CHCl<sub>3</sub>).



c) Sonogashira coupling of **3hb**

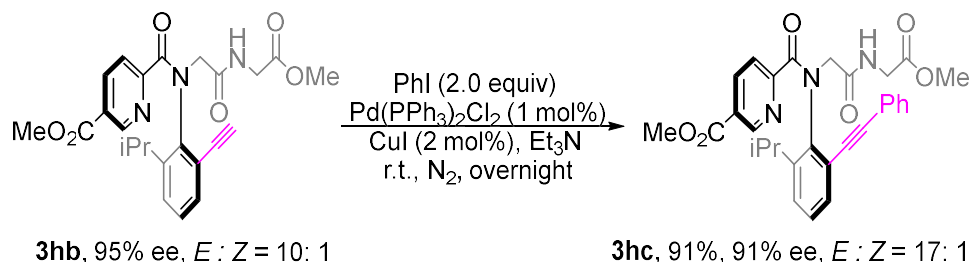

To an oven-dried 10 mL screw-capped vial containing a stirring bar was added **3hb** (0.10 mmol), PhI (2.0 equiv), Pd(PPh<sub>3</sub>)<sub>2</sub>Cl<sub>2</sub> (0.01 equiv), CuI (0.02 equiv) and Et<sub>3</sub>N (0.6 mL). Then the test tube was evacuated and back-filled with dry nitrogen (this sequence was repeated three times). The mixture was stirred overnight at room temperature. Then the resulting mixture was filtered through a celite pad and concentrated in vacuo. The residue was purified by preparative TLC (petroleum ether: ethyl acetate: triethylamine = 2: 1: 1%) to give **3hc** as a light yellow oil (48.0 mg, 91%,  $E : Z = 17 : 1$ ).

**Methyl-6-((2-isopropyl-6-(phenylethynyl)phenyl)(2-((2-methoxy-2-oxoethyl)amino)-2-oxoethyl)carbamoyl)nicotinate (**3hc**)**

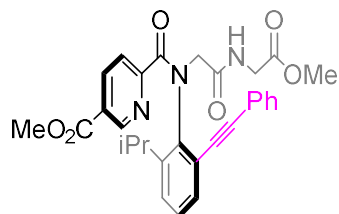

The title compound **3hc** was purified by preparative TLC (petroleum ether: ethyl acetate: triethylamine = 2: 1: 1%). **3hc** was obtained as a light yellow oil (48.0 mg, 91%,  $E : Z = 17 : 1$ ).

**<sup>1</sup>H NMR (400 MHz, CDCl<sub>3</sub>)**  $\delta$  8.77 (d,  $J = 1.4$  Hz, 1H), 8.18 (dd,  $J = 8.1, 2.1$  Hz, 1H), 7.86 (d,  $J = 8.2$  Hz, 1H), 7.63 (t,  $J = 5.2$  Hz, 1H), 7.55-7.50 (m, 2H), 7.40-7.35 (m, 3H), 7.28 (dd,  $J = 7.5, 2.0$  Hz, 1H), 7.21-7.14 (m, 2H), 4.59 (d,  $J = 14.8$  Hz, 1H), 4.37 (d,  $J = 14.8$  Hz, 1H), 4.02 (dd,  $J = 18.2, 5.8$  Hz, 1H), 3.87-3.81 (m, 4H), 3.68 (s, 3H), 3.45-3.36 (m, 1H), 1.24 (dd,  $J = 6.9, 3.7$  Hz, 6H); **<sup>13</sup>C NMR (101 MHz, CDCl<sub>3</sub>)**  $\delta$  169.88, 168.19, 165.10, 155.93, 148.60, 147.28, 142.11, 137.43, 131.43, 129.83, 128.94, 128.69, 128.55, 127.78, 126.44, 123.68, 122.36, 121.91, 93.97, 86.86, 55.96, 52.52, 52.27, 41.36, 28.71, 24.51, 23.28; **HRMS (ESI-TOF)** calcd for [C<sub>30</sub>H<sub>29</sub>N<sub>3</sub>O<sub>6</sub>+Na<sup>+</sup>]: 550.1948, found: 550.1949; Enantiomeric excess was determined by HPLC with a Daicel Chiralpak IF-3, *n*-Hexane/*i*-PrOH = 60/40, rate = 0.6 mL/min,  $\lambda = 254$  nm,  $t$  (minor) = 10.6 min,  $t$  (major) = 14.1 min, 91% ee;  $[\alpha]_D^{20} = -218.9$  ( $c = 0.5$ , CHCl<sub>3</sub>).

**d) Azide-Alkyne cycloaddition of 3hb**

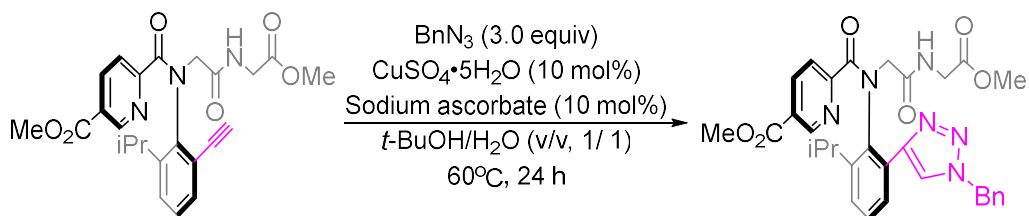

**3hb**, 95% ee,  $E : Z = 10 : 1$

**3hd**, 81%, 97% ee,  $E : Z = 4 : 1$

To an oven-dried 10 mL screw-capped vial containing a stirring bar was added **3hb** (0.10 mmol),  $\text{BnN}_3$  (3.0 equiv),  $\text{CuSO}_4 \cdot 5\text{H}_2\text{O}$  (0.1 equiv), Sodium ascorbate (0.1 equiv) and  $t\text{-BuOH}/\text{H}_2\text{O}$  (v/v, 1/1, 0.4 mL). The mixture was stirred for 24 h at  $25^\circ\text{C}$ . Then the resulting mixture was filtered through a celite pad and concentrated in vacuo. The residue was purified by preparative TLC (petroleum ether: ethyl acetate: triethylamine = 1: 1: 1%) to give **3hd** as a white foam (47.3 mg, 81%,  $E : Z = 4 : 1$ ).

**Methyl 6-((2-(1-benzyl-1*H*-1,2,3-triazol-4-yl)-6-isopropylphenyl)(2-((2-methoxy-2-oxoethyl)amino)-2-oxoethyl)carbamoyl)nicotinate (**3hd**)**

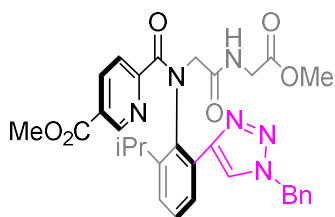

The title compound **3hd** was purified by preparative TLC (petroleum ether: ethyl acetate: triethylamine = 1: 1: 1%). **3hd** was obtained as a white foam (47.3 mg, 81%,  $E : Z = 4 : 1$ ).

$^1\text{H NMR}$  (400 MHz,  $\text{CDCl}_3$ )  $\delta$  8.69 (s, 1H), 8.00 (dd,  $J = 8.2, 2.1$  Hz, 1H), 7.96-7.93 (m, 1H), 7.63-7.60 (m, 2H), 7.42-7.37 (m, 3H), 7.34-7.29 (m, 3H), 7.24-7.19 (m, 2H), 5.59-5.46 (m, 2H), 4.39 (d,  $J = 14.8$  Hz, 1H), 4.04-3.98 (m, 3H), 3.86 (s, 3H), 3.74 (s, 3H), 3.25-3.18 (m, 1H), 1.15 (d,  $J = 6.7$  Hz, 3H), 0.91 (d,  $J = 6.7$  Hz, 3H);  $^{13}\text{C NMR}$  (101 MHz,  $\text{CDCl}_3$ )  $\delta$  170.08, 169.26, 168.38, 165.08, 156.05, 148.60, 147.46, 145.95, 138.94, 137.17, 134.62, 129.21, 129.15, 128.90, 128.82, 128.13, 128.04, 127.47, 127.19, 123.91, 122.57, 56.46, 54.23, 52.47, 52.25, 41.12, 28.30, 25.08, 23.27; **HRMS** (ESI-TOF) calcd for  $[\text{C}_{31}\text{H}_{32}\text{N}_6\text{O}_6 + \text{Na}^+]$ : 607.2275, found: 607.2276; Enantiomeric excess was determined by HPLC with a Daicel Chiralpak IF-3,  $n\text{-Hexane}/i\text{-PrOH} = 50/50$ , rate = 0.8 mL/min,  $\lambda = 254$  nm,  $t$  (major) = 22.5 min,  $t$  (minor) = 25.8 min, 97% ee;  $[\alpha]_{\text{D}}^{20} = -107.6$  ( $c = 1.0$ ,  $\text{CHCl}_3$ ).

### 3. Computational Details

All density functional theory (DFT) calculations were carried out using Gaussian09 software package<sup>3</sup>. All geometry optimizations were performed with  $\omega$ -B97XD<sup>4</sup> functional using LANL2DZ<sup>5</sup> basis set for palladium and 6-31G(d) basis set for the other atoms. The vibrational frequencies were computed at the same level of theory as for the geometry optimizations, and to evaluate the zero-point vibrational energy (ZPVE) and thermal corrections at 298 K. The single-point energies were computed based on the gas-phase optimized structures, using MN15L functional<sup>6</sup>, and def2-TZVPP<sup>7,8</sup> basis set for all atoms, with the inclusion of solvation energy corrections using a self-consistent reaction field (SCRF) based on SMD implicit solvent model<sup>9</sup> with HFIP ( $\epsilon = 16.7$ ) as solvent. In addition, to correct the Gibbs free energies under pressure of 1 atm to the standard state in solution (1 mol/L), a correction of  $RT \ln(c_s/c_g)$  (1.9 kcal/mol) is added to energies of all species.  $c_s$  is the standard molar concentration in solution (1 mol/L),  $c_g$  is the standard molar concentration in gas phase (0.0446 mol/L), and R is the gas constant. 3.2 kcal/mol free energy correction on HFIP solvent molecule was included based on the concentration of pure HFIP solvent under the standard state (9.45 mol/L).<sup>10</sup> The 3D diagrams of molecules were generated using CYLView20.<sup>11</sup>

#### 3.1 Exploration of C–H activation transition state with HFIP solvent involvements

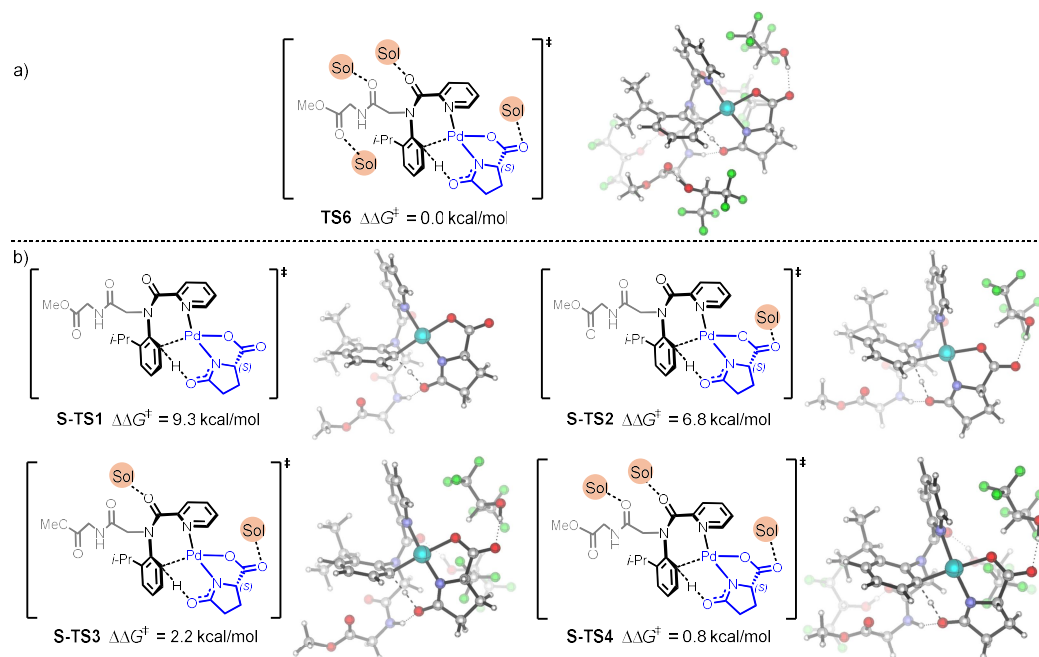

Fig. S1 Pd/L-pGlu-catalyzed C–H bond activation of methyl *N*-(2-isopropylphenyl)-*N*-picolinoyl-glycylglycinate (*rac*-**1a**) with or without the HFIP involvements.

### 3.2 Conformers of C–H activation transition state without HFIP involvement

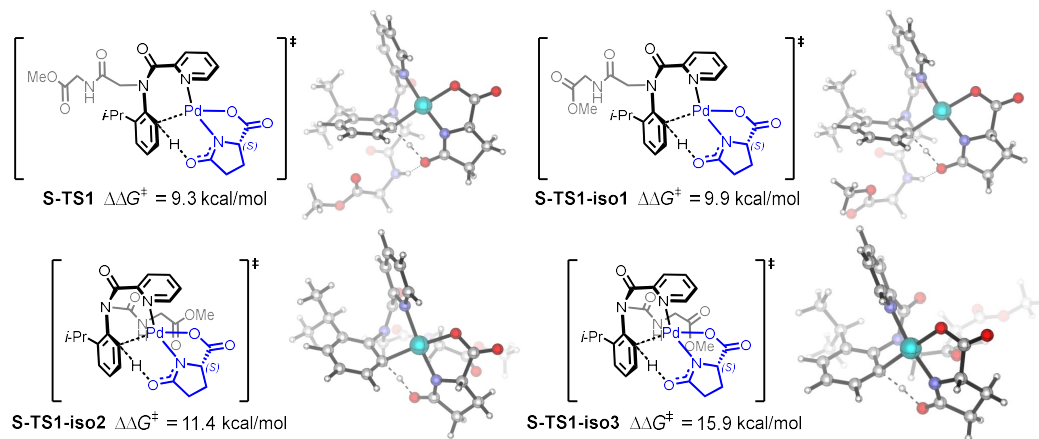

Fig. S2 Conformers of Pd/L-pGlu-catalyzed C–H bond activation transition state of methyl *N*-(2-isopropylphenyl)-*N*-picolinoylglycylglycinate (*rac*-**1a**) with no HFIP solvent involvement. Free energies are compared to **TS6**.

### 3.3 Conformers of C–H activation transition state with one HFIP involvement

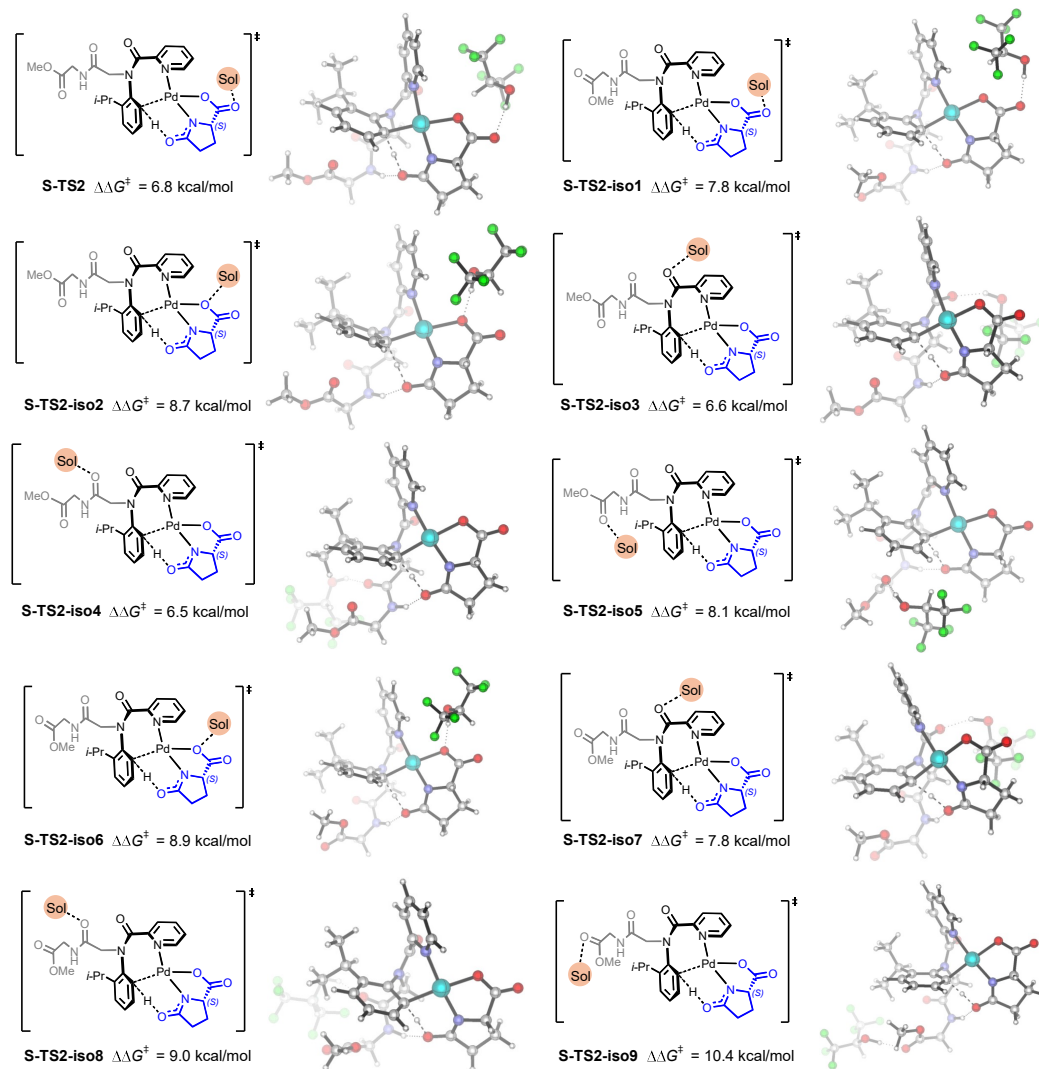

Fig. S3 Conformers of Pd/L-pGlu-catalyzed C–H bond activation transition state of methyl *N*-(2-isopropylphenyl)-*N*-picolinoylglycylglycinate (*rac*-**1a**) with one HFIP solvent involvement. Free energies are compared to **TS6**.

### 3.4 Conformers of C–H activation transition state with two HFIP involvements

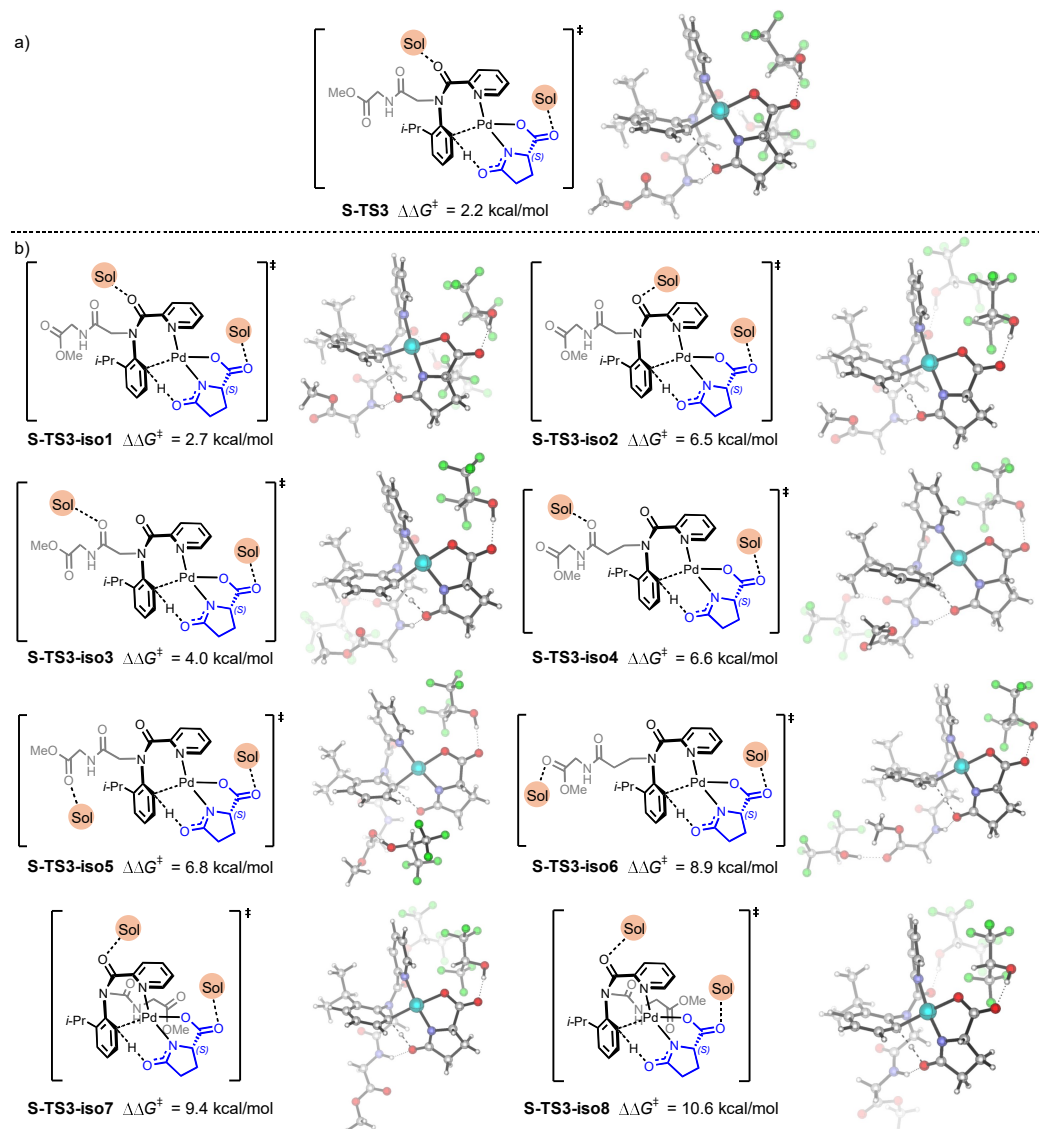

Fig. S4 Conformers of Pd/L-pGlu-catalyzed C–H bond activation transition state of methyl *N*-(2-isopropylphenyl)-*N*-picolinoylglycylglycinate (*rac*-**1a**) with two HFIP solvent involvements. Free energies are compared to **TS6**.

### 3.5 Conformers of C–H activation transition state with three HFIP involvements

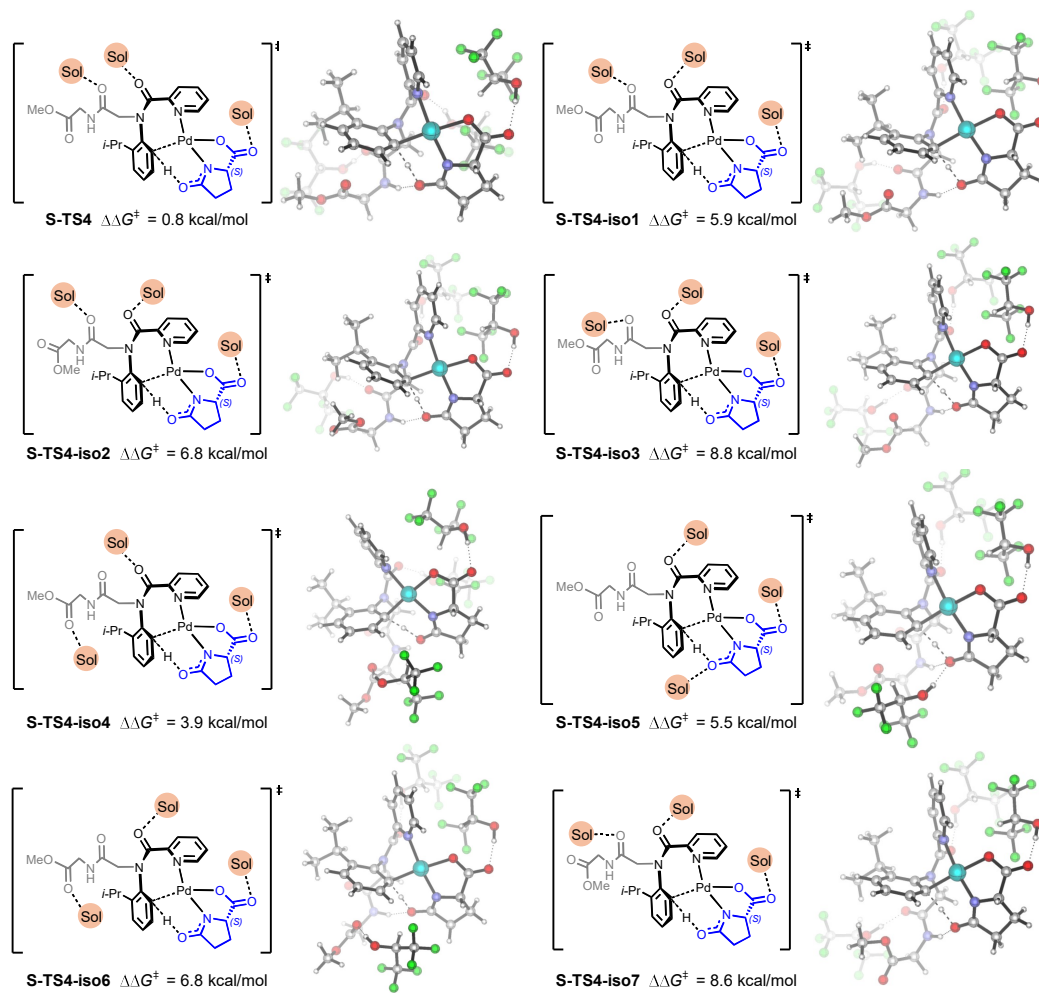

Fig. S5 Conformers of Pd/L-pGlu-catalyzed C–H bond activation transition state of methyl *N*-(2-isopropylphenyl)-*N*-picolinoylglycylglycinate (*rac*-**1a**) with three HFIP solvent involvements. Free energies are compared to **TS6**.

### 3.6 Conformers of C–H activation transition state with four HFIP involvements

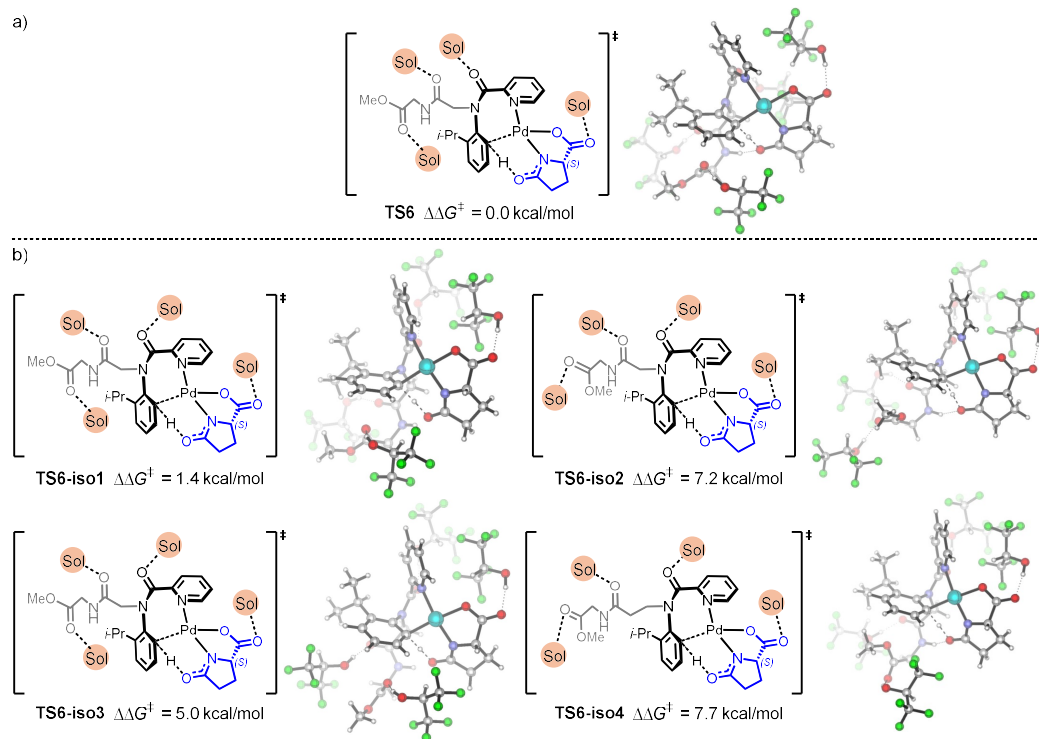

Fig. S6 Conformers of Pd/L-pGlu-catalyzed C–H bond activation transition state of methyl *N*-(2-isopropylphenyl)-*N*-picolinoylglycylglycinate (*rac*-**1a**) with four HFIP solvent involvements. Free energies are compared to **TS6**.



### 3.7 Conformers of C–H activation transition state leading to (*S*)-axial chirality

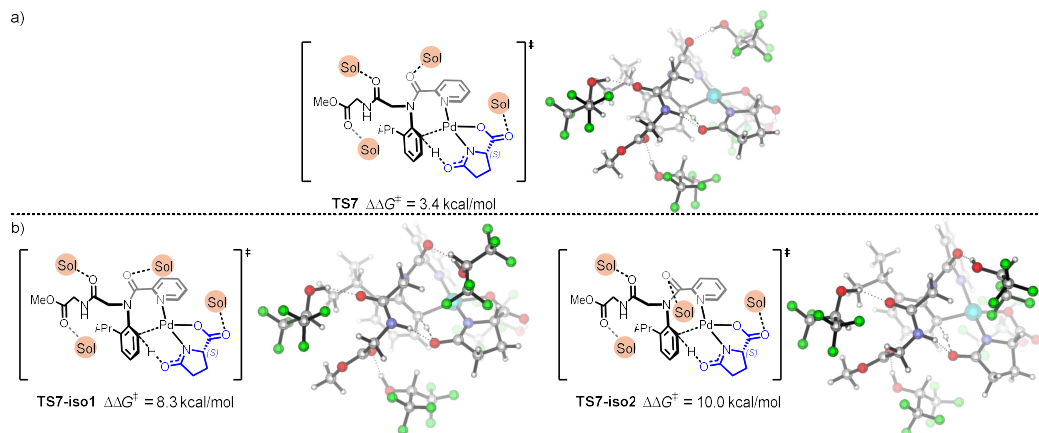

Fig. S7 Conformers of Pd/L-pGlu-catalyzed C–H bond activation transition state of methyl *N*-(2-isopropylphenyl)-*N*-picolinoylglycylglycinate (*rac*-**1a**) leading to (*S*)-axial chirality. Free energies are compared to **TS6**.

### 3.8 Table of Energies

Zero-point correction (*ZPE*), thermal correction to enthalpy (*TCH*), thermal correction to Gibbs free energy (*TCG*), energies (*E*), enthalpies (*H*), and Gibbs free energies (*G*) (in Hartree) of the structures calculated at the MN15L/def2-TZVPP-SMD (HFIP)// $\omega$ -B97XD/6-31G(d)-LANL2DZ level of theory.

**Table S11. Energies for all calculated species**

| Structures        | <i>ZPE</i> | <i>tcH</i> | <i>tcG</i> | <i>E</i>       | <i>H</i>     | <i>G</i>     | Imaginary<br>Frequency |
|-------------------|------------|------------|------------|----------------|--------------|--------------|------------------------|
| <b>TS6</b>        | 0.782997   | 0.860324   | 0.660297   | -4999.989365   | -4999.129041 | -4999.329068 | 1355.1 <i>i</i>        |
| <b>TS7</b>        | 0.782242   | 0.860046   | 0.657468   | -4999.981121   | -4999.121075 | -4999.323653 | 1337.0 <i>i</i>        |
| <b>TFIP</b>       | 0.063467   | 0.073554   | 0.02832    | -789.516565    | -789.443011  | -789.488245  |                        |
| <b>S-TS1</b>      | 0.519575   | 0.554821   | 0.453252   | -1841.83490308 | -1841.280082 | -1841.381651 | 1389.5 <i>i</i>        |
| <b>S-TS2</b>      | 0.584642   | 0.630741   | 0.500794   | -2631.369596   | -2630.738855 | -2630.868802 | 1354.5 <i>i</i>        |
| <b>S-TS3</b>      | 0.651057   | 0.707265   | 0.557055   | -3420.916271   | -6841.832542 | -3420.359216 | 1355.3 <i>i</i>        |
| <b>S-TS4</b>      | 0.716769   | 0.783715   | 0.607293   | -4210.451947   | -4209.668232 | -4209.844654 | 1345.1 <i>i</i>        |
| <b>S-TS1-iso1</b> | 0.519668   | 0.554892   | 0.453326   | -1841.83399594 | -1841.279104 | -1841.380670 | 1391.7 <i>i</i>        |
| <b>S-TS1-iso2</b> | 0.518154   | 0.554125   | 0.449906   | -1841.82817367 | -1841.274049 | -1841.378268 | 1369.4 <i>i</i>        |
| <b>S-TS1-iso3</b> | 0.518793   | 0.554520   | 0.450379   | -1841.82160309 | -1841.267083 | -1841.371224 | 1256.4 <i>i</i>        |
| <b>S-TS2-iso1</b> | 0.584507   | 0.630699   | 0.501270   | -2631.36848782 | -2630.737789 | -2630.867218 | 1394.3 <i>i</i>        |
| <b>S-TS2-iso2</b> | 0.584659   | 0.630633   | 0.502086   | -2631.36793147 | -2630.737298 | -2630.865845 | 1378.6 <i>i</i>        |
| <b>S-TS2-iso3</b> | 0.584336   | 0.630538   | 0.501461   | -2631.37054376 | -2630.740006 | -2630.869083 | 1382.1 <i>i</i>        |
| <b>S-TS2-iso4</b> | 0.584823   | 0.630877   | 0.503453   | -2631.37277800 | -2630.741901 | -2630.869325 | 1383.6 <i>i</i>        |
| <b>S-TS2-iso5</b> | 0.585055   | 0.630959   | 0.504466   | -2631.37122026 | -2630.740261 | -2630.866754 | 1400.1 <i>i</i>        |
| <b>S-TS2-iso6</b> | 0.584552   | 0.630607   | 0.501495   | -2631.36692738 | -2630.736320 | -2630.865432 | 1376.8 <i>i</i>        |
| <b>S-TS2-iso7</b> | 0.585156   | 0.631132   | 0.503262   | -2631.37043359 | -2630.739302 | -2630.867172 | 1380.5 <i>i</i>        |
| <b>S-TS2-iso8</b> | 0.585229   | 0.631113   | 0.503387   | -2631.36861105 | -2630.737498 | -2630.865224 | 1385.6 <i>i</i>        |
| <b>S-TS2-iso9</b> | 0.585358   | 0.631188   | 0.502765   | -2631.36584638 | -2630.734658 | -2630.863081 | 1386.8 <i>i</i>        |
| <b>S-TS3-iso1</b> | 0.651083   | 0.707359   | 0.557217   | -3420.915749   | -6841.831498 | -3420.358532 | 1357.5 <i>i</i>        |
| <b>S-TS3-iso2</b> | 0.650440   | 0.707139   | 0.554497   | -3420.90689516 | -3420.199756 | -3420.352398 | 1388.7 <i>i</i>        |
| <b>S-TS3-iso3</b> | 0.650577   | 0.707259   | 0.553473   | -3420.90992827 | -3420.202669 | -3420.356455 | 1366.1 <i>i</i>        |
| <b>S-TS3-iso4</b> | 0.650606   | 0.707271   | 0.553125   | -3420.905343   | -3420.198072 | -3420.352218 | 1366.3 <i>i</i>        |
| <b>S-TS3-iso5</b> | 0.651106   | 0.707458   | 0.554952   | -3420.90684786 | -3420.199390 | -3420.351896 | 1387.3 <i>i</i>        |
| <b>S-TS3-iso6</b> | 0.650606   | 0.707112   | 0.552782   | -3420.90140673 | -3420.194295 | -3420.348625 | 1370.2 <i>i</i>        |
| <b>S-TS3-iso7</b> | 0.649822   | 0.706750   | 0.552469   | -3420.90029762 | -3420.193548 | -3420.347829 | 1335.9 <i>i</i>        |
| <b>S-TS3-iso8</b> | 0.650031   | 0.707005   | 0.551785   | -3420.89769105 | -3420.190686 | -3420.345906 | 1370.0 <i>i</i>        |
| <b>S-TS4-iso1</b> | 0.717039   | 0.783888   | 0.608314   | -4210.44478795 | -4209.660900 | -4209.836474 | 1376.2 <i>i</i>        |
| <b>S-TS4-iso2</b> | 0.716312   | 0.783500   | 0.605870   | -4210.44095246 | -4209.657452 | -4209.835082 | 1382.4 <i>i</i>        |
| <b>S-TS4-iso3</b> | 0.716974   | 0.783812   | 0.606341   | -4210.43826054 | -4209.654449 | -4209.831920 | 1386.1 <i>i</i>        |
| <b>S-TS4-iso4</b> | 0.717733   | 0.784085   | 0.611289   | -4210.451062   | -4209.666977 | -4209.839773 | 1377.5 <i>i</i>        |
| <b>S-TS4-iso5</b> | 0.716688   | 0.783656   | 0.608516   | -4210.44561260 | -4209.661957 | -4209.837097 | 1386.3 <i>i</i>        |
| <b>S-TS4-iso6</b> | 0.717388   | 0.784156   | 0.607995   | -4210.44306597 | -4209.658910 | -4209.835071 | 1415.1 <i>i</i>        |
| <b>S-TS4-iso7</b> | 0.71734    | 0.784121   | 0.608373   | -4210.44056285 | -4209.656442 | -4209.832190 | 1373.5 <i>i</i>        |

|                 |          |          |          |                |              |              |         |
|-----------------|----------|----------|----------|----------------|--------------|--------------|---------|
| <b>TS6-iso1</b> | 0.782235 | 0.860045 | 0.657766 | -4999.98453691 | -4999.124492 | -4999.326771 | 1396.2i |
| <b>TS6-iso2</b> | 0.782464 | 0.860345 | 0.654902 | -4999.97024734 | -4999.109902 | -4999.315345 | 1385.7i |
| <b>TS6-iso3</b> | 0.783345 | 0.860368 | 0.662250 | -4999.98329276 | -4999.122925 | -4999.321043 | 1428.7i |
| <b>TS6-iso4</b> | 0.782497 | 0.860006 | 0.656146 | -4999.97063587 | -4999.110630 | -4999.314490 | 1398.9i |
| <b>TS7-iso1</b> | 0.782503 | 0.860181 | 0.658479 | -4999.974365   | -4999.114184 | -4999.315886 | 1286.5i |
| <b>TS7-iso2</b> | 0.783681 | 0.860932 | 0.661444 | -4999.975287   | -4999.114355 | -4999.313843 | 1331.9i |

### 3.9 Cartesian coordinates of the structures

#### TS6

|   |             |             |             |
|---|-------------|-------------|-------------|
| C | 1.18460800  | -1.94990700 | -0.99609000 |
| O | 1.75996300  | -2.71903000 | -0.23363900 |
| N | 0.01056500  | -1.33092800 | -0.71212800 |
| C | -0.59069800 | -0.39861000 | -1.63642500 |
| C | -1.52442800 | -0.83763500 | -2.57246600 |
| C | -0.17566500 | 0.94781100  | -1.55008200 |
| C | -1.99586800 | 0.11939800  | -3.48746800 |
| C | -0.71186500 | 1.86649500  | -2.46337600 |
| H | -0.20580300 | 1.46643700  | -0.27845700 |
| C | -1.60624400 | 1.44851600  | -3.44417800 |
| H | -2.70406600 | -0.19584500 | -4.24892500 |
| H | -0.43721900 | 2.91295800  | -2.39005700 |
| H | -2.00733000 | 2.16010400  | -4.15941300 |
| C | -0.39934200 | -1.31199000 | 0.69347100  |
| H | 0.14846600  | -0.53033900 | 1.22632700  |
| H | -0.13637500 | -2.26886300 | 1.14409100  |
| C | -2.03532400 | -2.26408300 | -2.65629300 |
| H | -1.67489900 | -2.80101900 | -1.77534800 |
| C | -3.56889700 | -2.30068600 | -2.61391900 |
| H | -3.92230800 | -3.33063800 | -2.52575200 |
| H | -3.93609100 | -1.74114300 | -1.74948700 |
| H | -4.01058100 | -1.87199500 | -3.52131500 |
| C | -1.50713300 | -2.96671100 | -3.91412500 |
| H | -1.87936800 | -2.48000300 | -4.82358600 |
| H | -0.41339000 | -2.95132200 | -3.95387700 |
| H | -1.83821600 | -4.01045700 | -3.93422800 |
| C | 1.84018000  | -1.67210500 | -2.32902600 |
| C | 2.14943500  | -2.73247100 | -3.16876600 |
| C | 2.85473100  | -2.47973600 | -4.33832100 |

|    |             |             |             |
|----|-------------|-------------|-------------|
| H  | 1.85090600  | -3.73555400 | -2.88720000 |
| C  | 2.95444100  | -0.17924200 | -3.70113300 |
| C  | 3.26548100  | -1.18071700 | -4.60781200 |
| H  | 3.10034000  | -3.28964200 | -5.01696900 |
| H  | 3.29137400  | 0.84067700  | -3.84226300 |
| H  | 3.84260400  | -0.94013400 | -5.49266600 |
| N  | 2.23901600  | -0.41557800 | -2.59292000 |
| C  | 0.83849200  | 2.61367300  | 1.01624300  |
| C  | 2.99990500  | 3.22469200  | 0.50835200  |
| C  | 2.80965100  | 3.48377700  | 2.01796000  |
| C  | 1.27805800  | 3.41712200  | 2.21311600  |
| H  | 3.11544600  | 4.16388300  | -0.04923800 |
| H  | 3.30389600  | 2.69352900  | 2.58619200  |
| H  | 3.23837100  | 4.43648500  | 2.33041400  |
| H  | 0.97128000  | 2.92987100  | 3.14064400  |
| H  | 0.79771300  | 4.40027800  | 2.17041400  |
| N  | 1.75964700  | 2.57634800  | 0.10246100  |
| O  | -0.29271500 | 2.01738000  | 0.87376000  |
| C  | 4.16060100  | 2.31254000  | 0.08569300  |
| O  | 5.23886600  | 2.36429200  | 0.66833300  |
| O  | 3.91551600  | 1.53527800  | -0.92442900 |
| Pd | 1.90804700  | 1.18205200  | -1.27116100 |
| C  | -1.89695600 | -1.13059000 | 0.84052900  |
| O  | -2.68795800 | -1.98940300 | 0.44754400  |
| N  | -2.29048300 | 0.00275400  | 1.45238200  |
| H  | -1.60684700 | 0.74406800  | 1.57485200  |
| C  | -3.69062200 | 0.34154200  | 1.47976900  |
| H  | -4.28876000 | -0.47826600 | 1.88284700  |
| H  | -3.83901000 | 1.21363900  | 2.12334000  |
| C  | -4.17619700 | 0.71285300  | 0.08649100  |
| O  | -3.44824200 | 1.13013000  | -0.79155100 |
| O  | -5.48017100 | 0.54740200  | -0.04496200 |
| C  | -6.04968600 | 0.93680400  | -1.30108300 |
| H  | -5.57392400 | 0.38504800  | -2.11531600 |
| H  | -7.10461900 | 0.68206800  | -1.22460600 |
| H  | -5.91483900 | 2.00995600  | -1.45166800 |
| O  | 1.83377300  | -2.54651000 | 2.52423900  |
| H  | 2.04995600  | -2.68232200 | 1.58194000  |
| C  | 2.81863000  | -1.80089000 | 3.15297800  |
| H  | 3.83531000  | -2.14345300 | 2.93348800  |
| C  | 2.60263600  | -1.96396000 | 4.65848700  |
| F  | 2.80480000  | -3.23566000 | 5.00757700  |
| F  | 3.46235400  | -1.20057400 | 5.34729000  |
| F  | 1.36295600  | -1.62302100 | 5.02184400  |

|   |             |             |             |
|---|-------------|-------------|-------------|
| C | 2.75365100  | -0.33439200 | 2.70910200  |
| F | 3.72966200  | 0.40653400  | 3.23047200  |
| F | 2.86616400  | -0.27885600 | 1.36528600  |
| F | 1.58227100  | 0.25337500  | 3.01764400  |
| O | 6.79290200  | 0.24049400  | -0.16783100 |
| H | 6.34002800  | 1.06993500  | 0.10640000  |
| C | 5.82257800  | -0.73197700 | -0.32987500 |
| H | 4.80821100  | -0.32606900 | -0.28230900 |
| C | 5.93957600  | -1.76974000 | 0.78764300  |
| F | 5.82781700  | -1.15455500 | 1.97876900  |
| F | 4.94528400  | -2.68161900 | 0.72550800  |
| F | 7.09628200  | -2.43064400 | 0.77903500  |
| C | 5.96206000  | -1.34813400 | -1.72092800 |
| F | 5.00620500  | -2.27700300 | -1.93649300 |
| F | 5.81332200  | -0.40241600 | -2.65941000 |
| F | 7.14415200  | -1.93421900 | -1.91978700 |
| O | -4.92150400 | -2.89592900 | 1.74616500  |
| H | -4.01947000 | -2.75430400 | 1.40022600  |
| C | -5.78301900 | -2.67958000 | 0.68054400  |
| H | -5.39602900 | -1.93428400 | -0.02374900 |
| C | -7.09118200 | -2.10903700 | 1.22995400  |
| F | -6.84564600 | -1.00206500 | 1.94055600  |
| F | -7.91284000 | -1.77305800 | 0.21900400  |
| F | -7.73745600 | -2.96502400 | 2.02041000  |
| C | -5.98142200 | -3.96901100 | -0.12803600 |
| F | -6.63535900 | -3.71865600 | -1.27476800 |
| F | -4.77905800 | -4.47273500 | -0.44713900 |
| F | -6.65286800 | -4.90859800 | 0.53631200  |
| O | -3.05715400 | 3.78277300  | -1.45641400 |
| H | -3.22875800 | 2.82669900  | -1.51717700 |
| C | -2.59532600 | 4.02052100  | -0.16715300 |
| H | -2.07986800 | 3.15572800  | 0.26504000  |
| C | -3.75684800 | 4.36104700  | 0.77725800  |
| F | -4.73682200 | 3.44617900  | 0.63078600  |
| F | -3.36310200 | 4.31065100  | 2.05885600  |
| F | -4.28988600 | 5.55959300  | 0.54745200  |
| C | -1.56283800 | 5.14558900  | -0.23551200 |
| F | -1.19939500 | 5.53630400  | 0.99900400  |
| F | -0.44951000 | 4.71308200  | -0.85507900 |
| F | -2.00762200 | 6.20961200  | -0.89541800 |

## TS7

|   |            |             |            |
|---|------------|-------------|------------|
| C | 0.42735800 | -2.97756800 | 0.07864300 |
|---|------------|-------------|------------|

|   |             |             |             |
|---|-------------|-------------|-------------|
| O | 0.65375700  | -3.88651700 | -0.71643200 |
| N | -0.66019100 | -2.17322600 | -0.02731600 |
| C | -0.81113000 | -1.02300200 | 0.82606900  |
| C | -1.57751100 | -1.09979600 | 1.98383700  |
| C | -0.11268300 | 0.14037300  | 0.44862400  |
| C | -1.58797300 | 0.03740600  | 2.80965900  |
| C | -0.15158600 | 1.24106200  | 1.31685900  |
| H | -0.32972600 | 0.66294900  | -0.77287000 |
| C | -0.88696900 | 1.19251800  | 2.49493600  |
| H | -2.16859700 | 0.00740200  | 3.72771800  |
| H | 0.39671800  | 2.13834600  | 1.05647200  |
| H | -0.91805800 | 2.05405700  | 3.15387300  |
| C | -1.33362900 | -2.17681100 | -1.32698800 |
| H | -1.44885900 | -3.21212400 | -1.65197000 |
| H | -0.70330700 | -1.65925000 | -2.06155700 |
| C | -2.37440900 | -2.32989000 | 2.36944100  |
| H | -2.35787900 | -3.01254400 | 1.51516400  |
| C | -1.74461300 | -3.04240700 | 3.57325500  |
| H | -2.30588500 | -3.95108900 | 3.81524600  |
| H | -0.70467400 | -3.32241000 | 3.37475100  |
| H | -1.75176900 | -2.39735400 | 4.46006700  |
| C | -3.83824000 | -1.96428000 | 2.63769600  |
| H | -3.95471000 | -1.41886300 | 3.58142300  |
| H | -4.22710900 | -1.33751900 | 1.83192200  |
| H | -4.45983500 | -2.86163100 | 2.69359000  |
| C | 1.40389500  | -2.75450500 | 1.21607800  |
| C | 1.68766800  | -3.80704300 | 2.07373000  |
| C | 2.65982900  | -3.63349500 | 3.05284900  |
| H | 1.16055800  | -4.74656900 | 1.95500400  |
| C | 3.01798300  | -1.42415600 | 2.21353200  |
| C | 3.32901500  | -2.41940400 | 3.12862600  |
| H | 2.89786000  | -4.44068500 | 3.73722500  |
| H | 3.52278800  | -0.46853800 | 2.22566300  |
| H | 4.09896600  | -2.23600700 | 3.86852800  |
| N | 2.07808500  | -1.58984600 | 1.27446700  |
| C | 0.62586700  | 1.52754300  | -2.34498400 |
| C | 2.85189600  | 1.07500400  | -2.69866700 |
| C | 2.58040500  | 2.44132700  | -3.34547300 |
| C | 1.03598500  | 2.44872500  | -3.47279400 |
| H | 2.93496600  | 0.28452600  | -3.45791700 |
| H | 2.91003000  | 3.23390400  | -2.66743000 |
| H | 3.09299300  | 2.56879500  | -4.29956000 |
| H | 0.57437700  | 3.42997700  | -3.34695500 |
| H | 0.69349800  | 2.03323000  | -4.42847900 |

|    |             |             |             |
|----|-------------|-------------|-------------|
| N  | 1.64372200  | 0.84805300  | -1.91739600 |
| O  | -0.54552700 | 1.40766500  | -1.82832000 |
| C  | 4.04081600  | 0.88725900  | -1.75533000 |
| O  | 5.07074300  | 1.53240000  | -1.90084500 |
| O  | 3.84752200  | -0.01194800 | -0.83077700 |
| Pd | 1.83160400  | -0.21346200 | -0.29108200 |
| C  | -2.71373200 | -1.54354100 | -1.24045700 |
| O  | -3.63348600 | -2.07453700 | -0.62548800 |
| N  | -2.85821800 | -0.38913600 | -1.92441200 |
| H  | -2.02900300 | 0.13448700  | -2.18919700 |
| C  | -4.09607700 | 0.33679600  | -1.84394600 |
| H  | -4.93853400 | -0.32498300 | -2.05261800 |
| H  | -4.09806500 | 1.12837100  | -2.59731700 |
| C  | -4.27841800 | 0.99373200  | -0.48592900 |
| O  | -3.38785100 | 1.15025100  | 0.32438900  |
| O  | -5.53223400 | 1.37866600  | -0.31235600 |
| C  | -5.83304600 | 2.05541900  | 0.91738300  |
| H  | -6.90449600 | 2.23945600  | 0.88744500  |
| H  | -5.57940800 | 1.41523900  | 1.76557800  |
| H  | -5.27516000 | 2.99292200  | 0.96924000  |
| O  | 3.37770500  | -4.39028500 | -0.84327700 |
| H  | 2.40723800  | -4.28094700 | -0.87855000 |
| C  | 3.99591000  | -3.20711400 | -1.22521300 |
| H  | 3.62337000  | -2.31738000 | -0.70588900 |
| C  | 3.77434100  | -2.93744200 | -2.71776800 |
| F  | 2.45687700  | -2.69771600 | -2.91209200 |
| F  | 4.43717400  | -1.85923800 | -3.15825200 |
| F  | 4.11382400  | -3.97233400 | -3.48273800 |
| C  | 5.46584100  | -3.32985300 | -0.82943700 |
| F  | 6.15814800  | -2.23871700 | -1.16717500 |
| F  | 5.54742600  | -3.46938300 | 0.50390400  |
| F  | 6.05297600  | -4.38810800 | -1.39241800 |
| O  | 5.85570600  | 2.73554100  | 0.43482300  |
| H  | 5.79755300  | 2.35303900  | -0.46536900 |
| C  | 5.06786600  | 1.94007300  | 1.25073500  |
| H  | 4.85045800  | 0.96710000  | 0.79342400  |
| C  | 3.71378100  | 2.61953500  | 1.48781300  |
| F  | 3.10287200  | 2.84484700  | 0.30904700  |
| F  | 2.88171300  | 1.82934800  | 2.20747500  |
| F  | 3.80892200  | 3.78401800  | 2.12244500  |
| C  | 5.82687400  | 1.66289000  | 2.54716400  |
| F  | 5.08793600  | 0.88508500  | 3.37794200  |
| F  | 6.95129900  | 0.99771600  | 2.28019000  |
| F  | 6.14144500  | 2.77106200  | 3.21564400  |

|   |             |             |             |
|---|-------------|-------------|-------------|
| O | -6.04243100 | -2.99534300 | 0.39797200  |
| H | -5.14097000 | -2.91617300 | 0.04117500  |
| C | -6.66691700 | -1.77657100 | 0.18419900  |
| H | -5.95952200 | -0.94407000 | 0.12628600  |
| C | -7.57439800 | -1.47438500 | 1.37681600  |
| F | -6.83455100 | -1.32268200 | 2.48559000  |
| F | -8.24172600 | -0.32265400 | 1.18550700  |
| F | -8.46337100 | -2.43828200 | 1.60198400  |
| C | -7.42117800 | -1.79080600 | -1.15174000 |
| F | -7.92900900 | -0.58644500 | -1.44781900 |
| F | -6.55430600 | -2.11033100 | -2.13271100 |
| F | -8.41042200 | -2.68154700 | -1.17471200 |
| O | -2.62440100 | 3.72731200  | 0.96955900  |
| H | -2.87976300 | 2.78973700  | 1.02834900  |
| C | -1.81950400 | 3.85617800  | -0.15835500 |
| H | -1.41070300 | 2.90024000  | -0.50099600 |
| C | -0.61896000 | 4.75080200  | 0.17145800  |
| F | -0.04267100 | 4.35264700  | 1.31324100  |
| F | 0.30663100  | 4.65815300  | -0.80120100 |
| F | -0.94698400 | 6.03547800  | 0.30814300  |
| C | -2.63986100 | 4.40395700  | -1.32987000 |
| F | -1.88181400 | 4.57774400  | -2.42268200 |
| F | -3.60648400 | 3.51581900  | -1.65026800 |
| F | -3.24211500 | 5.55617200  | -1.04990600 |

## TS8

|   |             |             |             |
|---|-------------|-------------|-------------|
| C | 1.55764500  | -1.87952700 | 1.21357900  |
| C | 2.79760600  | -2.49619200 | 1.09629000  |
| C | 0.68584800  | -1.76034100 | 0.11143000  |
| C | 3.19756200  | -3.00967400 | -0.13861600 |
| C | 1.10842400  | -2.31388700 | -1.11370000 |
| H | -0.57143700 | -2.07778800 | 0.44650400  |
| C | 2.35412400  | -2.92210000 | -1.24634600 |
| H | 4.16679800  | -3.49132100 | -0.23553500 |
| H | 0.43917300  | -2.26931400 | -1.96941000 |
| H | 2.66553400  | -3.33685200 | -2.20072700 |
| C | -2.51764400 | -1.57169100 | 0.33601100  |
| C | -3.10577800 | 0.47508600  | -0.56921800 |
| C | -4.30741600 | 0.00049200  | 0.27070500  |
| C | -4.02773600 | -1.50456100 | 0.46304700  |
| H | -3.34211700 | 0.44538900  | -1.64299800 |
| H | -4.30084400 | 0.51823800  | 1.23473300  |
| H | -5.26397400 | 0.20745500  | -0.21140800 |



|    |             |             |             |
|----|-------------|-------------|-------------|
| H  | -4.35437400 | -1.90694600 | 1.42428200  |
| H  | -4.48018200 | -2.11665100 | -0.32650600 |
| N  | -2.06798100 | -0.50246700 | -0.27458100 |
| O  | -1.77226200 | -2.50258400 | 0.76106100  |
| C  | -2.56504200 | 1.88349400  | -0.27754700 |
| O  | -3.32221900 | 2.81715000  | -0.09999200 |
| O  | -1.25582000 | 1.97457700  | -0.28726500 |
| Pd | -0.24185500 | 0.20026800  | -0.15709700 |
| C  | 2.78949900  | 0.73224800  | -0.33968200 |
| C  | 3.96215000  | 1.46435100  | -0.22775700 |
| C  | 1.52321900  | 2.51153400  | 0.42425400  |
| C  | 3.89657000  | 2.77122500  | 0.24311000  |
| H  | 4.90528000  | 1.00838600  | -0.50677300 |
| C  | 2.65440500  | 3.30260900  | 0.56953700  |
| H  | 0.52337800  | 2.88274300  | 0.62509000  |
| H  | 4.79834500  | 3.36666800  | 0.34693900  |
| H  | 2.54961500  | 4.31958000  | 0.93014000  |
| N  | 1.59339900  | 1.24211500  | -0.01079000 |
| H  | 1.24451300  | -1.48296400 | 2.17613900  |
| H  | 3.45427400  | -2.58037900 | 1.95740100  |
| H  | 2.79520000  | -0.28762800 | -0.70482200 |

### TFIP

|   |             |             |             |
|---|-------------|-------------|-------------|
| O | 0.04578600  | 1.85551400  | -0.00910600 |
| H | -0.72082800 | 2.33210800  | -0.35062600 |
| C | 0.00372500  | 0.55066800  | -0.49675700 |
| H | 0.00095300  | 0.50085300  | -1.59448000 |
| C | -1.26934700 | -0.16408800 | -0.02530900 |
| F | -2.32520200 | 0.60958000  | -0.35597800 |
| F | -1.42463000 | -1.34424100 | -0.63106700 |
| F | -1.30171900 | -0.35467600 | 1.29143500  |
| C | 1.29043700  | -0.13484500 | -0.03160300 |
| F | 2.34467500  | 0.45171600  | -0.60669700 |
| F | 1.28521100  | -1.42552400 | -0.39342100 |
| F | 1.44440900  | -0.06879600 | 1.28905700  |

### S-TS1

|   |             |            |             |
|---|-------------|------------|-------------|
| C | -0.31482700 | 1.72612800 | 1.75220800  |
| O | -0.57092700 | 1.88820700 | 2.93374700  |
| N | 0.56177700  | 0.79311800 | 1.28368000  |
| C | 0.89264800  | 0.67638400 | -0.11173700 |
| C | 1.94476400  | 1.42142200 | -0.64394900 |

|   |             |             |             |
|---|-------------|-------------|-------------|
| C | 0.11113800  | -0.20086700 | -0.89084600 |
| C | 2.16983200  | 1.29754000  | -2.02351700 |
| C | 0.40185900  | -0.30490300 | -2.25825500 |
| H | -0.05969800 | -1.46260300 | -0.35904700 |
| C | 1.41977400  | 0.45216300  | -2.82709900 |
| H | 2.97228900  | 1.87599600  | -2.47375200 |
| H | -0.17968900 | -0.98893800 | -2.87078800 |
| H | 1.63724000  | 0.37680800  | -3.88823900 |
| C | 0.89295200  | -0.30799500 | 2.18381800  |
| H | 0.14288900  | -1.10163200 | 2.07976400  |
| H | 0.84880900  | 0.08011600  | 3.20274600  |
| C | 2.81454100  | 2.34967000  | 0.18435400  |
| H | 2.56385900  | 2.18795000  | 1.23588600  |
| C | 4.30347800  | 2.01695700  | 0.02502800  |
| H | 4.90001200  | 2.64959300  | 0.69098200  |
| H | 4.48970900  | 0.97401600  | 0.29039700  |
| H | 4.65187400  | 2.19382200  | -1.00011800 |
| C | 2.53589000  | 3.81721400  | -0.17020200 |
| H | 2.79668000  | 4.02718600  | -1.21472300 |
| H | 1.47845700  | 4.06786100  | -0.03650200 |
| H | 3.13071400  | 4.48315400  | 0.46454600  |
| C | -1.04221900 | 2.59517100  | 0.74783100  |
| C | -1.05357300 | 3.97164800  | 0.94428000  |
| C | -1.82714800 | 4.76783400  | 0.11173900  |
| H | -0.46894100 | 4.38924900  | 1.75558700  |
| C | -2.57287800 | 2.77740300  | -0.97933000 |
| C | -2.60423100 | 4.15843100  | -0.86750200 |
| H | -1.83991100 | 5.84549700  | 0.23860400  |
| H | -3.19460100 | 2.24892200  | -1.69242000 |
| H | -3.24215300 | 4.73618600  | -1.52608700 |
| N | -1.79413400 | 2.01113500  | -0.20046500 |
| C | -1.44358100 | -2.89049400 | -0.07408700 |
| C | -3.66730200 | -2.42968700 | -0.47920600 |
| C | -3.62881100 | -3.67913600 | 0.42545300  |
| C | -2.16691600 | -4.16495200 | 0.30186100  |
| H | -4.00778100 | -2.68795400 | -1.49152600 |
| H | -3.84829400 | -3.38654500 | 1.45671100  |
| H | -4.36135500 | -4.43136900 | 0.13055600  |
| H | -1.75504000 | -4.59246700 | 1.21899700  |
| H | -2.03665900 | -4.90415500 | -0.49788300 |
| N | -2.27681900 | -2.00364100 | -0.53583500 |
| O | -0.18730500 | -2.66614400 | 0.04706500  |
| C | -4.54402500 | -1.25032400 | -0.00732100 |
| O | -5.67692800 | -1.46591400 | 0.37771300  |

|    |             |             |             |
|----|-------------|-------------|-------------|
| O  | -3.99098400 | -0.06952700 | -0.11007100 |
| Pd | -1.96754800 | -0.06956700 | -0.45536000 |
| C  | 2.29611800  | -0.83759000 | 1.92857800  |
| O  | 3.29370000  | -0.16331100 | 2.13542500  |
| N  | 2.35250600  | -2.12514800 | 1.49518200  |
| H  | 1.51471100  | -2.54015500 | 1.10060700  |
| C  | 3.62989000  | -2.65187500 | 1.09807700  |
| H  | 4.36868600  | -2.47402200 | 1.88198500  |
| H  | 3.54490700  | -3.73238200 | 0.94879300  |
| C  | 4.12545700  | -2.02026700 | -0.19741300 |
| O  | 3.42381000  | -1.47918800 | -1.01522900 |
| O  | 5.44899300  | -2.17050200 | -0.32099800 |
| C  | 6.01594100  | -1.61096500 | -1.50551600 |
| H  | 5.82298300  | -0.53586800 | -1.54641900 |
| H  | 7.08587400  | -1.80518500 | -1.43924400 |
| H  | 5.59282300  | -2.08366500 | -2.39548400 |

## S-TS2

|   |             |             |             |
|---|-------------|-------------|-------------|
| C | -0.14490100 | -1.45068600 | 1.23716600  |
| O | 0.42222100  | -1.54872900 | 2.31103800  |
| N | -1.32473000 | -0.78677200 | 1.05768300  |
| C | -1.98797100 | -0.72437600 | -0.21674200 |
| C | -2.90870300 | -1.70599300 | -0.57919200 |
| C | -1.65397600 | 0.35283000  | -1.06621000 |
| C | -3.47044700 | -1.59957900 | -1.86168500 |
| C | -2.26560500 | 0.41905900  | -2.32697600 |
| H | -1.71895300 | 1.58326500  | -0.47640300 |
| C | -3.16578100 | -0.56065200 | -2.72823000 |
| H | -4.18152000 | -2.35670800 | -2.18120700 |
| H | -2.03157600 | 1.25187900  | -2.98486700 |
| H | -3.63691700 | -0.51250900 | -3.70502700 |
| C | -1.71318800 | 0.15303200  | 2.10595800  |
| H | -1.24507300 | 1.12707400  | 1.91820300  |
| H | -1.33020200 | -0.23781200 | 3.05011900  |
| C | -3.29304900 | -2.86722900 | 0.31921100  |
| H | -2.84217500 | -2.69079500 | 1.29900300  |
| C | -4.81089500 | -2.93912400 | 0.52970400  |
| H | -5.05008700 | -3.73881300 | 1.23858400  |
| H | -5.18431000 | -1.99953400 | 0.94258900  |
| H | -5.33971400 | -3.15664200 | -0.40657600 |
| C | -2.75245700 | -4.19022800 | -0.24217900 |
| H | -3.21601600 | -4.42775700 | -1.20740700 |
| H | -1.66905600 | -4.14926700 | -0.39470700 |

|    |             |             |             |
|----|-------------|-------------|-------------|
| H  | -2.97255300 | -5.01344700 | 0.44608500  |
| C  | 0.50833800  | -2.07749600 | 0.02486200  |
| C  | 0.89688900  | -3.40938400 | 0.08674900  |
| C  | 1.60168300  | -3.95810400 | -0.97552900 |
| H  | 0.65568300  | -3.98424900 | 0.97312700  |
| C  | 1.55207300  | -1.81355200 | -2.02523500 |
| C  | 1.93830700  | -3.14393700 | -2.04973600 |
| H  | 1.90697400  | -4.99892400 | -0.95219500 |
| H  | 1.83271100  | -1.12612300 | -2.81404100 |
| H  | 2.51871600  | -3.51636000 | -2.88519900 |
| N  | 0.83326800  | -1.29403400 | -1.01885200 |
| C  | -0.70615400 | 3.32352800  | -0.30625600 |
| C  | 1.43434600  | 3.50464500  | -1.14435800 |
| C  | 1.26570700  | 4.63383300  | -0.10677500 |
| C  | -0.26447800 | 4.71748400  | 0.08108400  |
| H  | 1.49986200  | 3.90995000  | -2.16368300 |
| H  | 1.75119600  | 4.34167600  | 0.82909300  |
| H  | 1.71491000  | 5.57192200  | -0.43485400 |
| H  | -0.57922900 | 4.95832800  | 1.09887000  |
| H  | -0.73082800 | 5.44422200  | -0.59472500 |
| N  | 0.21209900  | 2.72014800  | -1.00959800 |
| O  | -1.81409800 | 2.77057900  | 0.01204700  |
| C  | 2.63933500  | 2.57128900  | -0.96308200 |
| O  | 3.73816700  | 3.03706700  | -0.67688600 |
| O  | 2.41024300  | 1.31131900  | -1.16164000 |
| Pd | 0.41765000  | 0.76277400  | -1.09323800 |
| C  | -3.22559800 | 0.27724100  | 2.21159800  |
| O  | -3.93065700 | -0.65666300 | 2.56183500  |
| N  | -3.72228300 | 1.51057000  | 1.92497400  |
| H  | -3.14132900 | 2.15469100  | 1.39857900  |
| C  | -5.15040600 | 1.66471500  | 1.85422700  |
| H  | -5.61489700 | 1.24046800  | 2.74618900  |
| H  | -5.39933900 | 2.72932300  | 1.81237700  |
| C  | -5.72920300 | 0.97966200  | 0.62195000  |
| O  | -5.10594800 | 0.71583700  | -0.37658600 |
| O  | -7.03220800 | 0.72916200  | 0.78465500  |
| C  | -7.66593100 | 0.07483200  | -0.31485300 |
| H  | -7.19113200 | -0.89189800 | -0.50126300 |
| H  | -8.70558100 | -0.06001900 | -0.01889100 |
| H  | -7.59899400 | 0.68642100  | -1.21817000 |
| O  | 5.45328400  | 0.91978200  | -0.14582900 |
| H  | 4.92259500  | 1.70954000  | -0.39197000 |
| C  | 4.60416300  | 0.01138300  | 0.46418300  |
| H  | 3.54827400  | 0.25295900  | 0.30536300  |

|   |            |             |             |
|---|------------|-------------|-------------|
| C | 4.83966700 | 0.01100800  | 1.97603500  |
| F | 4.58850800 | 1.23820300  | 2.45747900  |
| F | 4.01916000 | -0.84598500 | 2.60586500  |
| F | 6.09532100 | -0.30837700 | 2.30460700  |
| C | 4.81357700 | -1.36005800 | -0.17303000 |
| F | 3.96220200 | -2.27141700 | 0.34019100  |
| F | 4.56984900 | -1.29509600 | -1.49223400 |
| F | 6.05252600 | -1.83172000 | -0.01396300 |

### S-TS3

|   |             |             |             |
|---|-------------|-------------|-------------|
| C | 0.44854600  | -0.85546500 | -1.61655200 |
| O | -0.33289000 | -0.31095700 | -2.39291000 |
| N | 1.57915700  | -0.28385000 | -1.14308700 |
| C | 2.44831100  | -0.97100300 | -0.21851400 |
| C | 3.50089000  | -1.75307900 | -0.68824000 |
| C | 2.16629900  | -0.81813400 | 1.15625500  |
| C | 4.25764200  | -2.43292400 | 0.28027100  |
| C | 2.97802000  | -1.49608900 | 2.07670600  |
| H | 1.96597600  | 0.46754700  | 1.56415000  |
| C | 4.01440800  | -2.31300900 | 1.63953700  |
| H | 5.07415100  | -3.06811700 | -0.05232700 |
| H | 2.78913100  | -1.37038800 | 3.13941300  |
| H | 4.63709800  | -2.84654500 | 2.35094100  |
| C | 1.72654700  | 1.16451700  | -1.31244400 |
| H | 1.15552400  | 1.68287100  | -0.53700100 |
| H | 1.30851100  | 1.44133600  | -2.27977000 |
| C | 3.83567800  | -1.92609500 | -2.15869800 |
| H | 3.21329300  | -1.22981400 | -2.72714400 |
| C | 5.29777500  | -1.56265700 | -2.45009800 |
| H | 5.48733300  | -1.62854400 | -3.52671400 |
| H | 5.50744400  | -0.54035200 | -2.12954100 |
| H | 5.99225400  | -2.24853100 | -1.94957900 |
| C | 3.52705800  | -3.35795900 | -2.61986800 |
| H | 4.16623500  | -4.08429900 | -2.10345600 |
| H | 2.48615200  | -3.63117900 | -2.42020500 |
| H | 3.70886400  | -3.45977600 | -3.69522200 |
| C | 0.10992100  | -2.25801200 | -1.16673600 |
| C | -0.12728100 | -3.23408700 | -2.12445400 |
| C | -0.53467300 | -4.49605000 | -1.71240000 |
| H | -0.00103700 | -2.98780500 | -3.17209200 |
| C | -0.51633200 | -3.69214100 | 0.53708700  |
| C | -0.73336800 | -4.72838800 | -0.35768200 |
| H | -0.71613200 | -5.27841400 | -2.44170400 |

|    |             |             |             |
|----|-------------|-------------|-------------|
| H  | -0.70172800 | -3.80883900 | 1.59793300  |
| H  | -1.08056900 | -5.68685000 | 0.00940700  |
| N  | -0.08545800 | -2.48565900 | 0.14348500  |
| C  | 0.75610100  | 1.62103500  | 2.70127400  |
| C  | -1.18559600 | 0.73355500  | 3.58009000  |
| C  | -1.32684400 | 2.26866700  | 3.65881000  |
| C  | 0.10813500  | 2.78393300  | 3.41528400  |
| H  | -1.10963100 | 0.28562900  | 4.58056100  |
| H  | -1.99703900 | 2.61205300  | 2.86879500  |
| H  | -1.74362900 | 2.59657400  | 4.61191800  |
| H  | 0.15534400  | 3.68461000  | 2.80022400  |
| H  | 0.65116000  | 2.98235000  | 4.34656400  |
| N  | 0.06635300  | 0.52525200  | 2.86232700  |
| O  | 1.83239400  | 1.66672700  | 2.01380400  |
| C  | -2.29422600 | -0.03112300 | 2.84277900  |
| O  | -3.46819400 | 0.30422300  | 2.97222300  |
| O  | -1.89935000 | -1.04011300 | 2.13089500  |
| Pd | 0.09970400  | -0.97886400 | 1.59591100  |
| C  | 3.18829100  | 1.58361600  | -1.30994700 |
| O  | 3.95458700  | 1.26090400  | -2.20553100 |
| N  | 3.55517600  | 2.38090500  | -0.27525200 |
| H  | 2.96184100  | 2.41856500  | 0.54666900  |
| C  | 4.94321300  | 2.73047800  | -0.14379200 |
| H  | 5.31961100  | 3.13660400  | -1.08496500 |
| H  | 5.05043500  | 3.50087200  | 0.62550400  |
| C  | 5.79385700  | 1.52852900  | 0.24919500  |
| O  | 5.37713900  | 0.53019300  | 0.78237300  |
| O  | 7.07892500  | 1.74133100  | -0.05228900 |
| C  | 7.96645200  | 0.67291200  | 0.27698300  |
| H  | 7.67013100  | -0.23980000 | -0.24623100 |
| H  | 8.95316300  | 0.99877400  | -0.05024100 |
| H  | 7.96086400  | 0.48616500  | 1.35388600  |
| O  | -0.98947900 | 2.36394700  | -2.41810900 |
| H  | -0.92295400 | 1.39014900  | -2.47807100 |
| C  | -2.08210300 | 2.72617900  | -1.64689200 |
| H  | -2.99336200 | 2.16774800  | -1.88646200 |
| C  | -2.36997500 | 4.19904600  | -1.94142500 |
| F  | -2.66429300 | 4.35155000  | -3.23410000 |
| F  | -3.41550700 | 4.63234400  | -1.22330400 |
| F  | -1.32231900 | 4.97950100  | -1.65743100 |
| C  | -1.79733500 | 2.47180800  | -0.16192600 |
| F  | -2.82003500 | 2.80372500  | 0.62634100  |
| F  | -1.55125400 | 1.15706800  | 0.01744800  |
| F  | -0.71007800 | 3.12839500  | 0.27857700  |

|   |             |             |             |
|---|-------------|-------------|-------------|
| O | -5.01933200 | -1.06338200 | 1.15506500  |
| H | -4.54599900 | -0.60482300 | 1.88663500  |
| C | -4.14041600 | -1.17091100 | 0.09246800  |
| H | -3.12061100 | -0.87538000 | 0.35750700  |
| C | -4.58619300 | -0.25436700 | -1.04849900 |
| F | -4.69791300 | 1.00513700  | -0.59250900 |
| F | -3.67748600 | -0.22920600 | -2.04633200 |
| F | -5.75999300 | -0.59966800 | -1.57947300 |
| C | -4.05637500 | -2.63556900 | -0.33366100 |
| F | -3.21641000 | -2.79048100 | -1.37889900 |
| F | -3.57697400 | -3.38040300 | 0.67321100  |
| F | -5.23704500 | -3.14656700 | -0.68766600 |

#### S-TS4

|   |             |             |             |
|---|-------------|-------------|-------------|
| C | -0.52411700 | -0.75543400 | -1.38984900 |
| O | -0.94203800 | 0.11381600  | -2.14742900 |
| N | 0.49213700  | -0.58367400 | -0.50847100 |
| C | 0.93615900  | -1.65515600 | 0.35098600  |
| C | 1.93555000  | -2.52865400 | -0.07094200 |
| C | 0.30244800  | -1.77241000 | 1.60736800  |
| C | 2.25547900  | -3.58375300 | 0.80002300  |
| C | 0.68755000  | -2.82688100 | 2.44680500  |
| H | 0.22989000  | -0.61555400 | 2.31651500  |
| C | 1.65233100  | -3.74097600 | 2.03772600  |
| H | 3.01654200  | -4.29622300 | 0.49412000  |
| H | 0.22485600  | -2.91909700 | 3.42565000  |
| H | 1.94411900  | -4.56324000 | 2.68355100  |
| C | 0.87440500  | 0.78781800  | -0.17043600 |
| H | 0.23320900  | 1.15901800  | 0.63298200  |
| H | 0.72001500  | 1.41898900  | -1.04465400 |
| C | 2.66637200  | -2.40599200 | -1.39576600 |
| H | 2.37214900  | -1.45945500 | -1.85669600 |
| C | 4.18512400  | -2.35230400 | -1.18489300 |
| H | 4.69103400  | -2.14159100 | -2.12985900 |
| H | 4.44061500  | -1.56078600 | -0.47639800 |
| H | 4.57495300  | -3.30271800 | -0.80087900 |
| C | 2.29191400  | -3.55546800 | -2.34155400 |
| H | 2.61731300  | -4.52101600 | -1.93589200 |
| H | 1.21075900  | -3.61082400 | -2.50195200 |
| H | 2.77831000  | -3.42073100 | -3.31344800 |
| C | -1.20472400 | -2.10345200 | -1.43910100 |
| C | -1.31569100 | -2.76212400 | -2.65521400 |
| C | -2.03475000 | -3.94877000 | -2.71377500 |

|    |             |             |             |
|----|-------------|-------------|-------------|
| H  | -0.85406600 | -2.32860700 | -3.53452400 |
| C  | -2.53624100 | -3.67952600 | -0.39331700 |
| C  | -2.65575000 | -4.41493500 | -1.56255000 |
| H  | -2.12874900 | -4.48668900 | -3.65110300 |
| H  | -3.04127000 | -3.97472200 | 0.51847200  |
| H  | -3.25154800 | -5.31989700 | -1.56611800 |
| N  | -1.80981700 | -2.55549800 | -0.32663000 |
| C  | -1.02020500 | 0.55247700  | 3.39828200  |
| C  | -3.26946400 | 0.04168600  | 3.48747300  |
| C  | -3.13202300 | 1.50767300  | 3.95099000  |
| C  | -1.61957000 | 1.67062400  | 4.21803600  |
| H  | -3.58891000 | -0.61095800 | 4.31152700  |
| H  | -3.45433400 | 2.17446100  | 3.14942400  |
| H  | -3.74553000 | 1.72257500  | 4.82674200  |
| H  | -1.21648500 | 2.63413800  | 3.90008800  |
| H  | -1.35648000 | 1.52603800  | 5.27212000  |
| N  | -1.92243100 | -0.33099200 | 3.07183300  |
| O  | 0.20407600  | 0.45510300  | 3.04026500  |
| C  | -4.22436000 | -0.23574300 | 2.31777300  |
| O  | -5.29633600 | 0.35624000  | 2.23765900  |
| O  | -3.82913700 | -1.14044800 | 1.47647300  |
| Pd | -1.79430800 | -1.49014600 | 1.48704800  |
| C  | 2.33968600  | 0.87450900  | 0.20942000  |
| O  | 3.22409500  | 0.66936500  | -0.62384800 |
| N  | 2.59524700  | 1.21367300  | 1.48586400  |
| H  | 1.83324000  | 1.18566600  | 2.15720100  |
| C  | 3.95289800  | 1.18441900  | 1.97075400  |
| H  | 4.61584600  | 1.72703400  | 1.29397500  |
| H  | 3.99452400  | 1.68033300  | 2.94447300  |
| C  | 4.43549000  | -0.25304600 | 2.14058600  |
| O  | 3.71799500  | -1.19524000 | 2.36817800  |
| O  | 5.76292100  | -0.32606400 | 2.01714800  |
| C  | 6.33834300  | -1.62729000 | 2.15585300  |
| H  | 5.90264500  | -2.31211900 | 1.42391900  |
| H  | 7.40151400  | -1.48998400 | 1.96830000  |
| H  | 6.16496400  | -2.01632000 | 3.16190300  |
| O  | -1.08966400 | 2.81854600  | -1.66010700 |
| H  | -1.23573800 | 1.90068500  | -1.96065100 |
| C  | -2.22598700 | 3.31645200  | -1.04204900 |
| H  | -3.14874000 | 3.12055700  | -1.59821100 |
| C  | -2.06001900 | 4.83540200  | -0.96819000 |
| F  | -2.01575200 | 5.34349700  | -2.20122600 |
| F  | -3.09303300 | 5.39589400  | -0.32356800 |
| F  | -0.93766000 | 5.18364400  | -0.33271600 |



|   |             |             |             |
|---|-------------|-------------|-------------|
| C | -2.41518700 | 2.68080100  | 0.34097100  |
| F | -3.53683600 | 3.07996500  | 0.93976100  |
| F | -2.47806900 | 1.33930000  | 0.20402500  |
| F | -1.39200200 | 2.93205500  | 1.17725600  |
| O | -6.43641000 | -0.21153900 | -0.20842100 |
| H | -6.13822100 | -0.03350900 | 0.71261700  |
| C | -5.31015500 | -0.26094000 | -1.00954900 |
| H | -4.38186200 | -0.28664500 | -0.43081000 |
| C | -5.24438800 | 0.98420200  | -1.89640600 |
| F | -5.28363300 | 2.08408800  | -1.12420900 |
| F | -4.08655800 | 1.03600600  | -2.58985300 |
| F | -6.24459500 | 1.06681300  | -2.77367900 |
| C | -5.33618900 | -1.55572100 | -1.81930700 |
| F | -4.25551300 | -1.64749800 | -2.62261600 |
| F | -5.30760900 | -2.61322500 | -0.99459000 |
| F | -6.42044900 | -1.67184200 | -2.58763400 |
| O | 5.52239300  | 2.06555700  | -1.12204000 |
| H | 4.60739000  | 1.72623900  | -1.09794600 |
| C | 6.34526200  | 0.96211700  | -0.95011600 |
| H | 5.86922500  | 0.17862400  | -0.35059900 |
| C | 7.58256900  | 1.40319900  | -0.16828500 |
| F | 7.21787000  | 1.96552400  | 0.98941400  |
| F | 8.36020000  | 0.34232900  | 0.11780500  |
| F | 8.32569400  | 2.28771700  | -0.83412800 |
| C | 6.68354600  | 0.32193900  | -2.30247100 |
| F | 7.31261000  | -0.85422600 | -2.13319400 |
| F | 5.54422900  | 0.07976700  | -2.96908000 |
| F | 7.45000100  | 1.09322700  | -3.07342300 |

### S-TS1-iso1

|   |             |             |             |
|---|-------------|-------------|-------------|
| C | -0.23089100 | 1.69830700  | 1.77517600  |
| O | -0.45987900 | 1.83466100  | 2.96478200  |
| N | 0.63040800  | 0.76993700  | 1.26670900  |
| C | 0.93134500  | 0.69288000  | -0.13636900 |
| C | 1.95577300  | 1.47638200  | -0.67183400 |
| C | 0.14265100  | -0.17030700 | -0.92230700 |
| C | 2.12246300  | 1.42732800  | -2.06398500 |
| C | 0.37998100  | -0.20672800 | -2.30393300 |
| H | -0.02482800 | -1.44308100 | -0.41637600 |
| C | 1.34931600  | 0.60933200  | -2.87778100 |
| H | 2.89077700  | 2.04764400  | -2.51869500 |
| H | -0.21220900 | -0.87402800 | -2.92471800 |
| H | 1.51292000  | 0.60342900  | -3.95181700 |

|    |             |             |             |
|----|-------------|-------------|-------------|
| C  | 0.95934200  | -0.36289300 | 2.12399200  |
| H  | 0.20791600  | -1.15078200 | 1.99257400  |
| H  | 0.91347800  | -0.01229300 | 3.15669900  |
| C  | 2.85196100  | 2.36879400  | 0.16753100  |
| H  | 2.62307900  | 2.17387800  | 1.21841400  |
| C  | 4.33123900  | 2.01879000  | -0.03857000 |
| H  | 4.95509100  | 2.63216100  | 0.61987600  |
| H  | 4.51430700  | 0.97009000  | 0.20785400  |
| H  | 4.65354100  | 2.20866200  | -1.07017400 |
| C  | 2.58596000  | 3.85053600  | -0.13239300 |
| H  | 2.83759400  | 4.09601500  | -1.17143000 |
| H  | 1.53340800  | 4.10894600  | 0.02313500  |
| H  | 3.19642700  | 4.48614000  | 0.51798500  |
| C  | -0.97898200 | 2.58941200  | 0.80608900  |
| C  | -0.98296700 | 3.96143800  | 1.03058900  |
| C  | -1.77222900 | 4.77539700  | 0.23049500  |
| H  | -0.37934700 | 4.36160800  | 1.83680000  |
| C  | -2.54669300 | 2.80815300  | -0.88298800 |
| C  | -2.57197700 | 4.18685400  | -0.74310000 |
| H  | -1.77926200 | 5.85044000  | 0.37810200  |
| H  | -3.18532600 | 2.29557700  | -1.59275200 |
| H  | -3.22206000 | 4.77873900  | -1.37677000 |
| N  | -1.75258600 | 2.02510500  | -0.13707300 |
| C  | -1.39862200 | -2.87834400 | -0.12170300 |
| C  | -3.63392300 | -2.41019800 | -0.45170300 |
| C  | -3.56900700 | -3.67460400 | 0.43023600  |
| C  | -2.11179200 | -4.15848600 | 0.25425200  |
| H  | -4.00617600 | -2.65084500 | -1.45703700 |
| H  | -3.75766200 | -3.40007700 | 1.47246600  |
| H  | -4.31008200 | -4.42184300 | 0.14434000  |
| H  | -1.67316300 | -4.60091000 | 1.15163000  |
| H  | -2.00622600 | -4.88477100 | -0.56066700 |
| N  | -2.24543400 | -1.98354700 | -0.54348200 |
| O  | -0.13942900 | -2.65545000 | -0.03329300 |
| C  | -4.49354200 | -1.23829400 | 0.06615300  |
| O  | -5.61478400 | -1.45494700 | 0.48096800  |
| O  | -3.94053200 | -0.05538500 | -0.03326300 |
| Pd | -1.93307600 | -0.05223200 | -0.43097300 |
| C  | 2.36301700  | -0.88846100 | 1.86428500  |
| O  | 3.35979400  | -0.20900800 | 2.05775700  |
| N  | 2.41737000  | -2.18393300 | 1.46263600  |
| H  | 1.58404200  | -2.60989500 | 1.07152700  |
| C  | 3.70172500  | -2.77834400 | 1.19926700  |
| H  | 4.36978500  | -2.61510400 | 2.04715000  |

|   |            |             |             |
|---|------------|-------------|-------------|
| H | 3.57088300 | -3.85742300 | 1.07431300  |
| C | 4.43178700 | -2.25837800 | -0.03225800 |
| O | 5.62711800 | -2.34300500 | -0.17138800 |
| O | 3.59623700 | -1.76853400 | -0.95510200 |
| C | 4.22370800 | -1.31695100 | -2.15487600 |
| H | 4.92919900 | -2.06454500 | -2.52391500 |
| H | 3.41557100 | -1.15451900 | -2.86551200 |
| H | 4.75547700 | -0.37981300 | -1.96907100 |

### S-TS1-iso2

|   |             |             |             |
|---|-------------|-------------|-------------|
| C | 1.67815600  | 1.11599300  | -1.14894900 |
| O | 1.72475200  | 2.10842900  | -1.85799800 |
| N | 1.49310700  | 1.16364500  | 0.19884800  |
| C | 1.87302400  | 0.06252200  | 1.04498900  |
| C | 3.22225600  | -0.14136900 | 1.34688800  |
| C | 0.85048600  | -0.77074600 | 1.53141400  |
| C | 3.53023500  | -1.22397000 | 2.18312100  |
| C | 1.21643700  | -1.83916500 | 2.36309900  |
| H | -0.30742400 | -0.20647800 | 1.97170400  |
| C | 2.54929800  | -2.06472400 | 2.69228700  |
| H | 4.57053000  | -1.41046600 | 2.43770900  |
| H | 0.43801600  | -2.48891000 | 2.75407500  |
| H | 2.82744800  | -2.89181000 | 3.33861800  |
| C | 1.35351400  | 2.46000700  | 0.86477300  |
| H | 2.33676200  | 2.88729900  | 1.08635000  |
| H | 0.83924000  | 2.27095300  | 1.81418100  |
| C | 4.33882400  | 0.73583200  | 0.80367500  |
| H | 3.89985400  | 1.48613200  | 0.13842400  |
| C | 5.05051700  | 1.48995800  | 1.93539500  |
| H | 5.80794900  | 2.16662400  | 1.52602300  |
| H | 4.34295400  | 2.08517300  | 2.52175500  |
| H | 5.55387600  | 0.79694500  | 2.61951000  |
| C | 5.33435800  | -0.08094300 | -0.03208000 |
| H | 5.86316200  | -0.81904800 | 0.58153600  |
| H | 4.82591300  | -0.61760900 | -0.84008900 |
| H | 6.08559800  | 0.58033100  | -0.47704600 |
| C | 1.82436300  | -0.23788200 | -1.81414500 |
| C | 2.76581800  | -0.32359600 | -2.83592700 |
| C | 2.88476400  | -1.50410400 | -3.55519400 |
| H | 3.37257900  | 0.54653300  | -3.05617400 |
| C | 1.08440800  | -2.38465800 | -2.25543800 |
| C | 2.02018800  | -2.55248400 | -3.26446100 |
| H | 3.62498400  | -1.59529900 | -4.34341900 |

|    |             |             |             |
|----|-------------|-------------|-------------|
| H  | 0.35424500  | -3.15147000 | -2.02417200 |
| H  | 2.05170400  | -3.48583900 | -3.81452900 |
| N  | 1.00304000  | -1.26127900 | -1.52347400 |
| C  | -2.29096700 | -0.57530100 | 2.07743900  |
| C  | -3.21535000 | -2.13775100 | 0.63702500  |
| C  | -4.39747000 | -1.37081400 | 1.27218000  |
| C  | -3.75709300 | -0.58991200 | 2.44241900  |
| H  | -3.21366600 | -3.19284900 | 0.94507400  |
| H  | -4.81361300 | -0.67875400 | 0.53893800  |
| H  | -5.19184300 | -2.04437200 | 1.59789800  |
| H  | -4.12755700 | 0.43213400  | 2.53734700  |
| H  | -3.88164800 | -1.09033500 | 3.40994200  |
| N  | -2.03372100 | -1.48048800 | 1.16886300  |
| O  | -1.39744500 | 0.19755700  | 2.55726700  |
| C  | -3.12402000 | -2.13966700 | -0.90159700 |
| O  | -4.11337000 | -2.32846500 | -1.57953000 |
| O  | -1.90987100 | -1.98685600 | -1.38412500 |
| Pd | -0.51138800 | -1.34946600 | -0.04181100 |
| C  | 0.60523500  | 3.56833300  | 0.11094400  |
| O  | 1.10298200  | 4.67578300  | 0.03245100  |
| N  | -0.65219900 | 3.30949400  | -0.34295400 |
| H  | -1.05739000 | 4.05579200  | -0.89081700 |
| C  | -1.35575300 | 2.05203200  | -0.30855400 |
| H  | -1.07583600 | 1.38682100  | -1.14074000 |
| H  | -1.15589300 | 1.52165700  | 0.62324600  |
| C  | -2.85736200 | 2.21736400  | -0.38999400 |
| O  | -3.64307900 | 1.42264000  | 0.06875700  |
| O  | -3.21423100 | 3.30761400  | -1.07379000 |
| C  | -4.62155300 | 3.49763000  | -1.24438200 |
| H  | -5.10950700 | 3.60242200  | -0.27271000 |
| H  | -4.72450900 | 4.41274800  | -1.82562500 |
| H  | -5.05544300 | 2.64835400  | -1.77649500 |

### S-TS1-iso3

|   |             |             |             |
|---|-------------|-------------|-------------|
| C | 0.59376600  | 1.34475700  | 0.84589000  |
| O | 1.72244900  | 1.35823900  | 1.32191000  |
| N | 0.35834800  | 1.20560600  | -0.48185900 |
| C | -0.90474600 | 1.53192100  | -1.08201400 |
| C | -1.25551000 | 2.86903200  | -1.27833700 |
| C | -1.74969700 | 0.46080900  | -1.41819600 |
| C | -2.52124000 | 3.11441300  | -1.83065300 |
| C | -3.00074300 | 0.76209400  | -1.96946300 |
| H | -1.17779600 | -0.58921300 | -1.99917300 |

|    |             |             |             |
|----|-------------|-------------|-------------|
| C  | -3.38852200 | 2.08426800  | -2.17115800 |
| H  | -2.82982100 | 4.14276700  | -2.00185700 |
| H  | -3.66304800 | -0.05276000 | -2.24869500 |
| H  | -4.36005300 | 2.31516800  | -2.59798700 |
| C  | 1.47308900  | 0.79028700  | -1.31623900 |
| H  | 2.18512600  | 1.61197800  | -1.44450700 |
| H  | 1.06796600  | 0.52236200  | -2.29535600 |
| C  | -0.33385900 | 4.02682800  | -0.93454600 |
| H  | 0.57157300  | 3.61536600  | -0.47633300 |
| C  | 0.09874800  | 4.77645200  | -2.20260400 |
| H  | 0.81163600  | 5.56997100  | -1.95358900 |
| H  | 0.57495000  | 4.09797600  | -2.91802900 |
| H  | -0.76012400 | 5.24068900  | -2.70093900 |
| C  | -0.97201900 | 4.98194200  | 0.08305000  |
| H  | -1.85365100 | 5.48061700  | -0.33526600 |
| H  | -1.28619800 | 4.44744700  | 0.98558100  |
| H  | -0.25768000 | 5.75949000  | 0.37428100  |
| C  | -0.59520200 | 1.45765700  | 1.77110800  |
| C  | -0.52789300 | 2.37559100  | 2.81247200  |
| C  | -1.56700400 | 2.43234800  | 3.73209400  |
| H  | 0.34330000  | 3.01539100  | 2.88980200  |
| C  | -2.60347700 | 0.62790000  | 2.55573700  |
| C  | -2.62228200 | 1.53759000  | 3.60357500  |
| H  | -1.54335400 | 3.15051000  | 4.54522000  |
| H  | -3.37911300 | -0.11969400 | 2.43850600  |
| H  | -3.44441200 | 1.52533400  | 4.30971500  |
| N  | -1.62244300 | 0.60004800  | 1.64372100  |
| C  | -0.88445600 | -2.58508100 | -2.00332900 |
| C  | -1.60230100 | -3.84105400 | -0.20016700 |
| C  | -0.43011500 | -4.60549300 | -0.84823100 |
| C  | -0.33948700 | -3.97588100 | -2.25183000 |
| H  | -2.55158900 | -4.37051900 | -0.36442600 |
| H  | 0.48637800  | -4.39396400 | -0.28970600 |
| H  | -0.58654200 | -5.68536200 | -0.85707700 |
| H  | 0.67368600  | -3.91649600 | -2.65390200 |
| H  | -0.96972800 | -4.49320000 | -2.98552600 |
| N  | -1.62203600 | -2.57127200 | -0.91522000 |
| O  | -0.65327400 | -1.56287700 | -2.71512700 |
| C  | -1.49610700 | -3.59578700 | 1.31408200  |
| O  | -1.27371600 | -4.52374000 | 2.06678100  |
| O  | -1.71186200 | -2.36080800 | 1.70218300  |
| Pd | -1.71335800 | -0.97764600 | 0.22051500  |
| C  | 2.12293500  | -0.48477300 | -0.75417800 |
| O  | 1.44714300  | -1.46347600 | -0.48941200 |

|   |            |             |             |
|---|------------|-------------|-------------|
| N | 3.48081000 | -0.49748500 | -0.65805500 |
| H | 3.83931900 | -1.34706700 | -0.24067100 |
| C | 4.31775900 | 0.67701200  | -0.51328100 |
| H | 4.49057100 | 1.17852700  | -1.47131200 |
| H | 3.85371800 | 1.39827000  | 0.17177700  |
| C | 5.69038500 | 0.36823600  | 0.05188200  |
| O | 6.59286400 | 1.16784400  | 0.04920500  |
| O | 5.77408900 | -0.86163600 | 0.57189900  |
| C | 7.03463400 | -1.20266300 | 1.15401500  |
| H | 7.29178900 | -0.49168900 | 1.94186900  |
| H | 6.90613200 | -2.20320500 | 1.56419100  |
| H | 7.81721800 | -1.19406700 | 0.39203400  |

### S-TS2-iso1

|   |             |             |             |
|---|-------------|-------------|-------------|
| C | 0.85907600  | -1.52838500 | -1.81750600 |
| O | 0.67933100  | -1.64820900 | -3.01694000 |
| N | 1.90958000  | -0.84669100 | -1.27189500 |
| C | 2.15598300  | -0.81146100 | 0.14187400  |
| C | 2.88538300  | -1.83492100 | 0.74837400  |
| C | 1.61655800  | 0.27042100  | 0.86839500  |
| C | 2.99771700  | -1.78309200 | 2.14654000  |
| C | 1.79257800  | 0.28909000  | 2.26048900  |
| H | 1.85392200  | 1.51820900  | 0.33364800  |
| C | 2.46200800  | -0.74758100 | 2.90138000  |
| H | 3.53092100  | -2.58247000 | 2.65491100  |
| H | 1.39035100  | 1.12008100  | 2.83378900  |
| H | 2.57515300  | -0.74955200 | 3.98167300  |
| C | 2.59203000  | 0.11613700  | -2.12850800 |
| H | 2.09893800  | 1.09223700  | -2.04538300 |
| H | 2.49092600  | -0.23619400 | -3.15654700 |
| C | 3.51662500  | -2.98074000 | -0.02097500 |
| H | 3.40044100  | -2.76736100 | -1.08647000 |
| C | 5.02320000  | -3.07063700 | 0.25351600  |
| H | 5.46679000  | -3.86104900 | -0.36053400 |
| H | 5.51592100  | -2.13011400 | -0.00448000 |
| H | 5.23171500  | -3.31131800 | 1.30356800  |
| C | 2.81219500  | -4.30710700 | 0.29675800  |
| H | 2.94491200  | -4.58420500 | 1.34958200  |
| H | 1.73614900  | -4.24768000 | 0.10198200  |
| H | 3.22814000  | -5.11416100 | -0.31550600 |
| C | -0.17616200 | -2.12186400 | -0.88558200 |
| C | -0.61826700 | -3.41911100 | -1.11883100 |
| C | -1.68947600 | -3.91323500 | -0.38642800 |

|    |             |             |             |
|----|-------------|-------------|-------------|
| H  | -0.13272400 | -4.00511100 | -1.89036600 |
| C  | -1.82685700 | -1.79644200 | 0.70742800  |
| C  | -2.31225000 | -3.08282700 | 0.53853200  |
| H  | -2.05066100 | -4.92237200 | -0.55480600 |
| H  | -2.30208600 | -1.10301000 | 1.38980700  |
| H  | -3.17860700 | -3.40116100 | 1.10439500  |
| N  | -0.77538700 | -1.32677500 | 0.01794000  |
| C  | 0.94179800  | 3.27258800  | -0.05832800 |
| C  | -1.34416500 | 3.46203500  | 0.18706200  |
| C  | -0.89806700 | 4.61315800  | -0.73935400 |
| C  | 0.62637900  | 4.68605500  | -0.49695600 |
| H  | -1.65581800 | 3.84896100  | 1.16693400  |
| H  | -1.10236300 | 4.34623900  | -1.78081000 |
| H  | -1.41813500 | 5.54742600  | -0.52539600 |
| H  | 1.20802000  | 4.96190800  | -1.37937800 |
| H  | 0.88928200  | 5.38249900  | 0.30809100  |
| N  | -0.13762600 | 2.66098700  | 0.34285300  |
| O  | 2.09010500  | 2.70839600  | -0.08068800 |
| C  | -2.48945000 | 2.56458800  | -0.30095700 |
| O  | -3.54654100 | 3.07698700  | -0.65530100 |
| O  | -2.27425800 | 1.28764100  | -0.25753800 |
| Pd | -0.36496800 | 0.71258700  | 0.27418000  |
| C  | 4.07550300  | 0.21748300  | -1.80576500 |
| O  | 4.83764800  | -0.72763400 | -1.93845100 |
| N  | 4.48819000  | 1.45136600  | -1.41884100 |
| H  | 3.80086700  | 2.11911800  | -1.08868000 |
| C  | 5.87806000  | 1.65698100  | -1.10567600 |
| H  | 6.50274200  | 1.28277400  | -1.91915400 |
| H  | 6.06165700  | 2.73096400  | -1.00597100 |
| C  | 6.37961100  | 0.98661900  | 0.16662100  |
| O  | 7.54493600  | 0.74473100  | 0.36232500  |
| O  | 5.40244700  | 0.76451800  | 1.05356200  |
| C  | 5.83333100  | 0.19098500  | 2.28809200  |
| H  | 6.69846600  | 0.72920100  | 2.68096600  |
| H  | 4.98285500  | 0.27193200  | 2.96222700  |
| H  | 6.09921100  | -0.85906900 | 2.13962700  |
| O  | -5.61544000 | 1.25391000  | -0.65465400 |
| H  | -4.89853100 | 1.92551900  | -0.72760300 |
| C  | -5.06802200 | 0.08113100  | -0.16571900 |
| H  | -3.99791100 | -0.00673300 | -0.38515100 |
| C  | -5.76414800 | -1.09319000 | -0.84848800 |
| F  | -5.52536200 | -1.06198200 | -2.16278400 |
| F  | -5.29094300 | -2.27061200 | -0.38250200 |
| F  | -7.08553000 | -1.09226100 | -0.66586000 |

|   |             |             |            |
|---|-------------|-------------|------------|
| C | -5.19771600 | 0.04585500  | 1.36129800 |
| F | -4.61566000 | -1.05860200 | 1.89355000 |
| F | -4.56617500 | 1.10463900  | 1.88869100 |
| F | -6.46098600 | 0.06719000  | 1.78336400 |

**S-TS2-iso2**

|   |             |             |             |
|---|-------------|-------------|-------------|
| C | -1.13374000 | 1.44064100  | -2.11028000 |
| O | -1.07676000 | 1.49554800  | -3.32677000 |
| N | -2.07093600 | 0.72118500  | -1.42477600 |
| C | -2.16097000 | 0.73729000  | 0.01081100  |
| C | -2.92555600 | 1.70710800  | 0.65649300  |
| C | -1.43803400 | -0.25100900 | 0.71558000  |
| C | -2.91246400 | 1.68744800  | 2.06077700  |
| C | -1.48065600 | -0.23334700 | 2.11761500  |
| H | -1.65425400 | -1.52891900 | 0.27267400  |
| C | -2.20942300 | 0.74057300  | 2.79000500  |
| H | -3.48533900 | 2.44069300  | 2.59526400  |
| H | -0.93871700 | -0.99489300 | 2.67184300  |
| H | -2.23840700 | 0.76002100  | 3.87503300  |
| C | -2.77596200 | -0.32099800 | -2.16583900 |
| H | -2.20317400 | -1.25528000 | -2.12032000 |
| H | -2.83250200 | 0.00225800  | -3.20659300 |
| C | -3.72077800 | 2.77330300  | -0.07489200 |
| H | -3.68480100 | 2.54021500  | -1.14222900 |
| C | -5.19852900 | 2.75679800  | 0.33719300  |
| H | -5.75588100 | 3.49514100  | -0.24906300 |
| H | -5.63725500 | 1.77495700  | 0.14673700  |
| H | -5.32738200 | 3.00964500  | 1.39703600  |
| C | -3.10324200 | 4.16108200  | 0.14889400  |
| H | -3.16563000 | 4.45575500  | 1.20357000  |
| H | -2.04740000 | 4.18368400  | -0.13985200 |
| H | -3.63746400 | 4.91464400  | -0.43990800 |
| C | -0.09031600 | 2.18338900  | -1.30550400 |
| C | 0.15880500  | 3.51825200  | -1.59408400 |
| C | 1.18922000  | 4.17299500  | -0.92972800 |
| H | -0.44853300 | 4.01487600  | -2.34177500 |
| C | 1.67315300  | 2.12246500  | 0.19676600  |
| C | 1.95945900  | 3.46194000  | -0.01882300 |
| H | 1.39612400  | 5.21845200  | -1.13383100 |
| H | 2.27585100  | 1.52023800  | 0.86194700  |
| H | 2.79238700  | 3.91536800  | 0.50485800  |
| N | 0.66594900  | 1.49647400  | -0.42965600 |
| C | -0.66060500 | -3.23453400 | -0.14576900 |



|    |             |             |             |
|----|-------------|-------------|-------------|
| C  | 1.64308400  | -3.25257200 | -0.12407600 |
| C  | 1.19637200  | -4.49090900 | -0.93087500 |
| C  | -0.28529500 | -4.65170100 | -0.52287300 |
| H  | 2.05901900  | -3.55300000 | 0.84700900  |
| H  | 1.27138000  | -4.27885200 | -2.00206500 |
| H  | 1.80551600  | -5.37018700 | -0.71799300 |
| H  | -0.93303300 | -5.03071000 | -1.31648700 |
| H  | -0.40875600 | -5.30350600 | 0.35037400  |
| N  | 0.40439700  | -2.52091100 | 0.08733600  |
| O  | -1.84521100 | -2.75817400 | -0.06797400 |
| C  | 2.69216100  | -2.33341700 | -0.76685200 |
| O  | 3.79439600  | -2.76939500 | -1.04733900 |
| O  | 2.32624200  | -1.08694400 | -0.92249800 |
| Pd | 0.47908300  | -0.56764500 | -0.10049400 |
| C  | -4.19087800 | -0.51392600 | -1.64125300 |
| O  | -5.03943900 | 0.36046000  | -1.72867500 |
| N  | -4.44441100 | -1.73787500 | -1.10515200 |
| H  | -3.65841900 | -2.31506600 | -0.82521200 |
| C  | -5.70788100 | -1.93707500 | -0.44659600 |
| H  | -6.52179800 | -1.60862700 | -1.09536900 |
| H  | -5.84546300 | -3.00230000 | -0.23841600 |
| C  | -5.77925500 | -1.16940900 | 0.86830300  |
| O  | -4.82179500 | -0.82380900 | 1.51550500  |
| O  | -7.04854700 | -0.94976600 | 1.22519500  |
| C  | -7.21892400 | -0.22668600 | 2.44463600  |
| H  | -6.74800100 | 0.75657700  | 2.36692700  |
| H  | -8.29504100 | -0.12606500 | 2.58030100  |
| H  | -6.77404600 | -0.77117600 | 3.28129400  |
| O  | 4.24358200  | 0.72584700  | -0.63572800 |
| H  | 3.56524200  | 0.08263200  | -0.94983300 |
| C  | 5.14515500  | 0.00791800  | 0.13767200  |
| H  | 5.20913500  | -1.04620700 | -0.16316100 |
| C  | 4.69988200  | 0.02878200  | 1.60488100  |
| F  | 3.48261000  | -0.54671400 | 1.71515800  |
| F  | 5.53035800  | -0.64231400 | 2.40790500  |
| F  | 4.57667200  | 1.27733600  | 2.08225200  |
| C  | 6.52728900  | 0.62861600  | -0.06304700 |
| F  | 7.45206800  | 0.01304200  | 0.69046700  |
| F  | 6.89571600  | 0.51009600  | -1.34097400 |
| F  | 6.54386900  | 1.92977000  | 0.25265400  |

### S-TS2-iso3

|   |             |            |            |
|---|-------------|------------|------------|
| C | -0.01522600 | 0.64138100 | 1.91329800 |
|---|-------------|------------|------------|

|   |             |             |             |
|---|-------------|-------------|-------------|
| O | -0.89475700 | 0.12871300  | 2.60694100  |
| N | 0.87651600  | -0.07925300 | 1.20320800  |
| C | 1.89968900  | 0.53690900  | 0.39159500  |
| C | 3.15677800  | 0.80027100  | 0.93267300  |
| C | 1.55227500  | 0.85114300  | -0.93691000 |
| C | 4.07618600  | 1.44497000  | 0.09066500  |
| C | 2.52521700  | 1.45922900  | -1.74028700 |
| H | 0.87896800  | -0.15257200 | -1.61016300 |
| C | 3.77939900  | 1.76880300  | -1.22428000 |
| H | 5.06101900  | 1.68403400  | 0.48275200  |
| H | 2.28747000  | 1.68924900  | -2.77542400 |
| H | 4.52780200  | 2.25232700  | -1.84484400 |
| C | 0.57387100  | -1.50111100 | 1.02028700  |
| H | -0.17262200 | -1.60832400 | 0.22707200  |
| H | 0.15318500  | -1.87383400 | 1.95557800  |
| C | 3.54643100  | 0.45997500  | 2.35985200  |
| H | 2.75183100  | -0.16043300 | 2.78312000  |
| C | 4.83532200  | -0.37018300 | 2.41056500  |
| H | 5.04281000  | -0.66939500 | 3.44353400  |
| H | 4.72831600  | -1.27477300 | 1.80844900  |
| H | 5.70020600  | 0.20050700  | 2.05141400  |
| C | 3.67693500  | 1.73499700  | 3.20498800  |
| H | 4.48939400  | 2.37199800  | 2.83490300  |
| H | 2.75635400  | 2.32761600  | 3.18439300  |
| H | 3.89890000  | 1.48191100  | 4.24757100  |
| C | 0.05951700  | 2.15080200  | 1.87635700  |
| C | 0.09607400  | 2.83986700  | 3.08266500  |
| C | 0.04820200  | 4.22784000  | 3.06762300  |
| H | 0.15062100  | 2.28046800  | 4.00929400  |
| C | -0.14903700 | 4.12402600  | 0.68778700  |
| C | -0.07979200 | 4.88124500  | 1.84777100  |
| H | 0.09007600  | 4.78788100  | 3.99601000  |
| H | -0.29720500 | 4.58041700  | -0.28358200 |
| H | -0.14603600 | 5.96121300  | 1.78655700  |
| N | -0.06248700 | 2.78661400  | 0.69946500  |
| C | -0.69002900 | -0.51917100 | -2.80841300 |
| C | -2.20116300 | 1.15543500  | -3.28190100 |
| C | -2.91592400 | -0.18365400 | -3.56663500 |
| C | -1.76322400 | -1.21086200 | -3.61512800 |
| H | -2.01555700 | 1.70939300  | -4.21175600 |
| H | -3.59678600 | -0.41334200 | -2.74400600 |
| H | -3.50348500 | -0.15288100 | -4.48501000 |
| H | -2.01011400 | -2.17583700 | -3.16771700 |
| H | -1.39708200 | -1.39232000 | -4.63246900 |

|    |             |             |             |
|----|-------------|-------------|-------------|
| N  | -0.92632400 | 0.75671100  | -2.69886900 |
| O  | 0.32053800  | -1.08640300 | -2.25848000 |
| C  | -2.92741600 | 2.12723500  | -2.32898200 |
| O  | -4.10104700 | 2.37945600  | -2.51342200 |
| O  | -2.18107800 | 2.66171700  | -1.39410600 |
| Pd | -0.36517400 | 1.77601600  | -1.11541800 |
| C  | 1.81986700  | -2.32496100 | 0.72565500  |
| O  | 2.67688200  | -2.52124500 | 1.57406900  |
| N  | 1.86055200  | -2.87260200 | -0.51443600 |
| H  | 1.25322000  | -2.49435700 | -1.23474600 |
| C  | 3.03895600  | -3.59268100 | -0.91073800 |
| H  | 3.31985900  | -4.30460500 | -0.13160100 |
| H  | 2.83112900  | -4.15658200 | -1.82479300 |
| C  | 4.21825000  | -2.66327800 | -1.16969000 |
| O  | 4.14339800  | -1.46968100 | -1.31896800 |
| O  | 5.35706000  | -3.36251800 | -1.23378900 |
| C  | 6.53199400  | -2.59072300 | -1.48286500 |
| H  | 6.66989300  | -1.84488400 | -0.69596100 |
| H  | 7.35613800  | -3.30306300 | -1.48585400 |
| H  | 6.45917800  | -2.08257400 | -2.44776600 |
| O  | -3.55889200 | -0.45179100 | 2.24826000  |
| H  | -2.72571400 | 0.00280500  | 2.46635000  |
| C  | -3.22024700 | -1.64352300 | 1.63202600  |
| H  | -2.23575800 | -2.01390900 | 1.94098300  |
| C  | -3.15324400 | -1.46364000 | 0.10852700  |
| F  | -2.39008600 | -0.39284000 | -0.17550300 |
| F  | -2.57202800 | -2.52314400 | -0.48995000 |
| F  | -4.34340900 | -1.27544400 | -0.45795900 |
| C  | -4.23717000 | -2.70487800 | 2.05414000  |
| F  | -4.01849800 | -3.85709800 | 1.39648900  |
| F  | -4.11004500 | -2.95104100 | 3.36245400  |
| F  | -5.49233300 | -2.32620200 | 1.82152200  |

#### S-TS2-iso4

|   |             |             |             |
|---|-------------|-------------|-------------|
| C | 1.51535500  | 1.55357300  | -1.69880200 |
| O | 1.49129100  | 1.58009700  | -2.91727500 |
| N | 0.75841300  | 0.70491100  | -0.94345400 |
| C | 0.75015700  | 0.74140600  | 0.49550500  |
| C | -0.14687800 | 1.57380600  | 1.16410100  |
| C | 1.67437100  | -0.08300000 | 1.16964700  |
| C | -0.06884800 | 1.58808300  | 2.56525100  |
| C | 1.68821600  | -0.04513700 | 2.57062500  |
| H | 1.70874000  | -1.39918800 | 0.74623900  |

|    |             |             |             |
|----|-------------|-------------|-------------|
| C  | 0.82609100  | 0.79499800  | 3.26767100  |
| H  | -0.74684100 | 2.23248500  | 3.11827200  |
| H  | 2.37991800  | -0.68717200 | 3.10975000  |
| H  | 0.84295300  | 0.82742000  | 4.35281200  |
| C  | 0.22202900  | -0.46924900 | -1.62209700 |
| H  | 0.96835700  | -1.27237800 | -1.61455300 |
| H  | 0.02468100  | -0.19107800 | -2.65911900 |
| C  | -1.16753700 | 2.44340300  | 0.45381200  |
| H  | -1.16162400 | 2.16208700  | -0.60258800 |
| C  | -2.58456800 | 2.19157400  | 0.98251500  |
| H  | -3.32542200 | 2.65552700  | 0.32658000  |
| H  | -2.78941600 | 1.11911800  | 1.01991600  |
| H  | -2.72085800 | 2.60263100  | 1.99014600  |
| C  | -0.79879500 | 3.92921600  | 0.56204200  |
| H  | -0.80865200 | 4.26133600  | 1.60720500  |
| H  | 0.20052200  | 4.12537800  | 0.16027800  |
| H  | -1.51882700 | 4.54153100  | 0.00856200  |
| C  | 2.46078600  | 2.49355700  | -0.98243400 |
| C  | 2.44463100  | 3.84096000  | -1.32373100 |
| C  | 3.38765800  | 4.69168200  | -0.76403300 |
| H  | 1.70283200  | 4.19342600  | -2.03080600 |
| C  | 4.32848600  | 2.79799400  | 0.34957700  |
| C  | 4.34914600  | 4.15912600  | 0.08763800  |
| H  | 3.38361400  | 5.75028300  | -1.00235900 |
| H  | 5.08237300  | 2.32604400  | 0.96855700  |
| H  | 5.11902900  | 4.77894600  | 0.53217200  |
| N  | 3.39291700  | 1.98287100  | -0.15972700 |
| C  | 2.95942900  | -2.89370600 | 0.26218300  |
| C  | 5.21796600  | -2.48034400 | 0.05730200  |
| C  | 4.93258100  | -3.79110300 | -0.70510600 |
| C  | 3.54391700  | -4.21720700 | -0.17765900 |
| H  | 5.79793700  | -2.67401600 | 0.96997000  |
| H  | 4.88540900  | -3.58245500 | -1.77821200 |
| H  | 5.70538400  | -4.54436400 | -0.54725400 |
| H  | 2.90691800  | -4.69819100 | -0.92362800 |
| H  | 3.61060500  | -4.88915200 | 0.68655400  |
| N  | 3.89235500  | -2.00274800 | 0.42562700  |
| O  | 1.71454000  | -2.63340800 | 0.43927500  |
| C  | 5.96277500  | -1.37133500 | -0.71529200 |
| O  | 6.96087000  | -1.65268900 | -1.34880100 |
| O  | 5.46497400  | -0.16850900 | -0.58199500 |
| Pd | 3.59638000  | -0.07101600 | 0.25002600  |
| C  | -1.07899600 | -0.93465600 | -0.99453300 |
| O  | -2.10392200 | -0.25818200 | -1.04232600 |

|   |             |             |             |
|---|-------------|-------------|-------------|
| N | -1.04534500 | -2.14827900 | -0.41064200 |
| H | -0.14453200 | -2.56825600 | -0.20104900 |
| C | -2.22520100 | -2.63896300 | 0.25378100  |
| H | -3.07501300 | -2.63250200 | -0.43176300 |
| H | -2.05071200 | -3.67225100 | 0.56608700  |
| C | -2.56271300 | -1.80885900 | 1.48826300  |
| O | -1.76481000 | -1.19813600 | 2.15329300  |
| O | -3.87637600 | -1.86586500 | 1.73801300  |
| C | -4.33434800 | -1.10691300 | 2.86142000  |
| H | -4.13756100 | -0.04389600 | 2.70151500  |
| H | -5.40651900 | -1.28659700 | 2.91393800  |
| H | -3.83483300 | -1.43669600 | 3.77482500  |
| O | -4.48476000 | 0.99337300  | -1.50917500 |
| H | -3.54566500 | 0.73982800  | -1.54986500 |
| C | -5.10809000 | 0.05047300  | -0.70474300 |
| H | -4.43558900 | -0.37460300 | 0.04616500  |
| C | -5.60329900 | -1.13333700 | -1.54542500 |
| F | -4.57700300 | -1.62276600 | -2.26283500 |
| F | -6.05696400 | -2.13048200 | -0.77043400 |
| F | -6.57235500 | -0.79459500 | -2.39751100 |
| C | -6.23102800 | 0.74501000  | 0.06245700  |
| F | -6.93552300 | -0.14108100 | 0.78886000  |
| F | -5.71130500 | 1.63631600  | 0.92201100  |
| F | -7.07721400 | 1.39110200  | -0.73674500 |

### S-TS2-iso5

|   |             |             |             |
|---|-------------|-------------|-------------|
| C | 3.32504800  | 0.96559700  | -1.24958200 |
| O | 3.96092600  | 0.96393500  | -2.29021300 |
| N | 2.03257500  | 1.38929300  | -1.15180400 |
| C | 1.32201100  | 1.42722600  | 0.09798400  |
| C | 1.33756300  | 2.58680500  | 0.87538100  |
| C | 0.63065100  | 0.26263500  | 0.48450500  |
| C | 0.65084700  | 2.53700000  | 2.09829500  |
| C | -0.04604900 | 0.27465100  | 1.71175400  |
| H | -0.17309100 | -0.27929300 | -0.51364500 |
| C | -0.03374200 | 1.40645000  | 2.51978500  |
| H | 0.65476700  | 3.41810500  | 2.73463600  |
| H | -0.58401700 | -0.61087000 | 2.03185900  |
| H | -0.55894500 | 1.40718200  | 3.47011500  |
| C | 1.27783000  | 1.47670800  | -2.40043500 |
| H | 0.88357000  | 0.48585200  | -2.65770700 |
| H | 1.97229300  | 1.78597300  | -3.18319800 |
| C | 2.08185600  | 3.84732400  | 0.47400700  |

|    |             |             |             |
|----|-------------|-------------|-------------|
| H  | 2.39466400  | 3.72708100  | -0.56622900 |
| C  | 1.17741900  | 5.08457800  | 0.53102100  |
| H  | 1.71007500  | 5.95269300  | 0.12895900  |
| H  | 0.27976600  | 4.92975500  | -0.07160800 |
| H  | 0.88186200  | 5.32554700  | 1.55939200  |
| C  | 3.33047200  | 4.03791200  | 1.34659100  |
| H  | 3.05757000  | 4.19367200  | 2.39745800  |
| H  | 3.99009400  | 3.16505600  | 1.30221900  |
| H  | 3.89764800  | 4.91449700  | 1.01465200  |
| C  | 4.00906800  | 0.44100000  | -0.00371900 |
| C  | 5.25301700  | 0.95937400  | 0.33957100  |
| C  | 5.95264600  | 0.39657700  | 1.39791500  |
| H  | 5.65407400  | 1.78453200  | -0.23721300 |
| C  | 4.18267800  | -1.19090700 | 1.63024500  |
| C  | 5.40889600  | -0.70301900 | 2.05271900  |
| H  | 6.91647700  | 0.79774000  | 1.69385400  |
| H  | 3.73627000  | -2.07260000 | 2.07485100  |
| H  | 5.92728800  | -1.19152600 | 2.86953600  |
| N  | 3.48605000  | -0.61867400 | 0.63614400  |
| C  | -0.80793800 | -2.03415000 | -1.26004400 |
| C  | 0.24849100  | -3.97740400 | -0.61850300 |
| C  | -0.55741100 | -4.30637800 | -1.89447400 |
| C  | -1.53049800 | -3.11196700 | -2.03015800 |
| H  | -0.18406500 | -4.47172400 | 0.26127300  |
| H  | 0.12264700  | -4.34761400 | -2.75044500 |
| H  | -1.06623300 | -5.26852800 | -1.82735200 |
| H  | -1.71761400 | -2.79986500 | -3.06023100 |
| H  | -2.49939100 | -3.29525600 | -1.55432800 |
| N  | 0.09431100  | -2.53782700 | -0.47621000 |
| O  | -1.01545900 | -0.76324100 | -1.33529600 |
| C  | 1.75395300  | -4.32009900 | -0.63267900 |
| O  | 2.11538000  | -5.40919400 | -1.03228600 |
| O  | 2.54208600  | -3.39051500 | -0.15396200 |
| Pd | 1.67658000  | -1.55099900 | 0.12658900  |
| C  | 0.16083300  | 2.50799800  | -2.31191900 |
| O  | 0.38644800  | 3.70295000  | -2.20559200 |
| N  | -1.09391600 | 1.98939100  | -2.41303800 |
| H  | -1.21762700 | 0.99133900  | -2.27789700 |
| C  | -2.23299500 | 2.83627100  | -2.21053000 |
| H  | -1.98403800 | 3.84841700  | -2.53974700 |
| H  | -3.08461800 | 2.48688000  | -2.80128200 |
| C  | -2.66043500 | 2.88972500  | -0.75425400 |
| O  | -2.07578000 | 2.33238900  | 0.15276500  |
| O  | -3.76218100 | 3.61139200  | -0.60950500 |

|   |             |             |             |
|---|-------------|-------------|-------------|
| C | -4.31366200 | 3.68075300  | 0.71072200  |
| H | -3.56309500 | 4.04152200  | 1.41782100  |
| H | -5.14330300 | 4.38232900  | 0.64250900  |
| H | -4.66859900 | 2.69482800  | 1.01886200  |
| O | -3.42969500 | 0.57406600  | 1.76882700  |
| H | -2.85120400 | 1.27500400  | 1.41141400  |
| C | -3.34692900 | -0.50809100 | 0.89998700  |
| H | -2.42001000 | -0.51136700 | 0.31745200  |
| C | -4.48804100 | -0.45835300 | -0.12276800 |
| F | -4.33693400 | 0.62512200  | -0.91223900 |
| F | -4.48469600 | -1.53476400 | -0.92311100 |
| F | -5.68708000 | -0.36578400 | 0.44918300  |
| C | -3.36723600 | -1.79966700 | 1.72236700  |
| F | -3.09050600 | -2.86138000 | 0.94244800  |
| F | -2.43418700 | -1.75588300 | 2.68135300  |
| F | -4.54469600 | -2.01778000 | 2.30955300  |

### S-TS2-iso6

|   |            |             |             |
|---|------------|-------------|-------------|
| C | 1.18114200 | 1.48204300  | 2.07333300  |
| O | 1.15276400 | 1.53528000  | 3.29007600  |
| N | 2.10532400 | 0.76505700  | 1.36420400  |
| C | 2.16004700 | 0.79856600  | -0.07088000 |
| C | 2.87813600 | 1.80327500  | -0.72017800 |
| C | 1.43840300 | -0.19193400 | -0.77159500 |
| C | 2.78526300 | 1.83729300  | -2.12062300 |
| C | 1.40852700 | -0.12761400 | -2.17313300 |
| H | 1.67403700 | -1.47195700 | -0.34724900 |
| C | 2.06088500 | 0.89991900  | -2.84591500 |
| H | 3.30647500 | 2.62680600  | -2.65621000 |
| H | 0.86087700 | -0.88602900 | -2.72611900 |
| H | 2.01368400 | 0.97067400  | -3.92872700 |
| C | 2.81041200 | -0.29380800 | 2.07600200  |
| H | 2.24390900 | -1.22941600 | 1.99738500  |
| H | 2.85250900 | -0.00312100 | 3.12732500  |
| C | 3.70588800 | 2.84595600  | 0.00838300  |
| H | 3.70189300 | 2.58887800  | 1.07070400  |
| C | 5.16852100 | 2.81005800  | -0.45370200 |
| H | 5.76022000 | 3.52488500  | 0.12734900  |
| H | 5.59624700 | 1.81714800  | -0.29607500 |
| H | 5.26687500 | 3.08114900  | -1.51246500 |
| C | 3.10500700 | 4.24772200  | -0.16500500 |
| H | 3.14540500 | 4.57154000  | -1.21215400 |
| H | 2.05776600 | 4.28009400  | 0.15275100  |

|    |             |             |             |
|----|-------------|-------------|-------------|
| H  | 3.66747200  | 4.97560300  | 0.42925800  |
| C  | 0.11259000  | 2.21561600  | 1.29349900  |
| C  | -0.14048800 | 3.54917000  | 1.58371700  |
| C  | -1.19103800 | 4.19342700  | 0.94070200  |
| H  | 0.48008200  | 4.05341000  | 2.31532000  |
| C  | -1.68500000 | 2.13478600  | -0.16711800 |
| C  | -1.97624900 | 3.47303200  | 0.05017900  |
| H  | -1.40124900 | 5.23804700  | 1.14559500  |
| H  | -2.29912400 | 1.52593500  | -0.81573100 |
| H  | -2.82359700 | 3.91879200  | -0.45668200 |
| N  | -0.65882000 | 1.51896300  | 0.43829400  |
| C  | 0.72231300  | -3.19556200 | 0.09089900  |
| C  | -1.58084000 | -3.24361800 | 0.15551100  |
| C  | -1.08798800 | -4.47903000 | 0.93903200  |
| C  | 0.37792300  | -4.61986000 | 0.47066900  |
| H  | -2.02736300 | -3.54500400 | -0.80155300 |
| H  | -1.12184200 | -4.27133200 | 2.01318400  |
| H  | -1.69421800 | -5.36506000 | 0.74738000  |
| H  | 1.06109400  | -4.99826100 | 1.23426300  |
| H  | 0.47286600  | -5.26288100 | -0.41259900 |
| N  | -0.36045700 | -2.49440800 | -0.09656200 |
| O  | 1.89686700  | -2.70287800 | -0.02684000 |
| C  | -2.61693300 | -2.33947900 | 0.83778300  |
| O  | -3.70311400 | -2.78669500 | 1.15721200  |
| O  | -2.26167400 | -1.08677900 | 0.98119800  |
| Pd | -0.45552000 | -0.54472800 | 0.10245100  |
| C  | 4.23670500  | -0.46835600 | 1.57558300  |
| O  | 5.07196000  | 0.41798800  | 1.66718000  |
| N  | 4.51523500  | -1.70190200 | 1.08081200  |
| H  | 3.74683900  | -2.29823300 | 0.79439100  |
| C  | 5.83854300  | -1.97317600 | 0.58414000  |
| H  | 6.58090000  | -1.64835400 | 1.31587000  |
| H  | 5.95358800  | -3.05248100 | 0.44690800  |
| C  | 6.20822400  | -1.30343600 | -0.73263300 |
| O  | 7.34938700  | -1.17816000 | -1.10336900 |
| O  | 5.13851300  | -0.93278900 | -1.44502400 |
| C  | 5.43793500  | -0.34897100 | -2.71312100 |
| H  | 6.11426600  | -0.99125400 | -3.28160900 |
| H  | 4.48035600  | -0.24543800 | -3.21911100 |
| H  | 5.90347700  | 0.63056700  | -2.57566200 |
| O  | -4.21533400 | 0.68781700  | 0.67938700  |
| H  | -3.52766800 | 0.06011600  | 1.00287800  |
| C  | -5.11336800 | -0.05382500 | -0.07587600 |
| H  | -5.16698400 | -1.10211800 | 0.24617400  |



|   |             |             |             |
|---|-------------|-------------|-------------|
| C | -4.67487400 | -0.05739100 | -1.54539000 |
| F | -3.45351800 | -0.62596900 | -1.65072600 |
| F | -5.50373900 | -0.74932100 | -2.33159500 |
| F | -4.56253500 | 1.18287400  | -2.04620400 |
| C | -6.50015200 | 0.55901600  | 0.11928700  |
| F | -7.42291200 | -0.08048300 | -0.61614000 |
| F | -6.86017200 | 0.46420600  | 1.40127900  |
| F | -6.52890100 | 1.85287900  | -0.22379200 |

### S-TS2-iso7

|   |             |             |             |
|---|-------------|-------------|-------------|
| C | 0.07288700  | 0.51752000  | 1.92231300  |
| O | -0.82376700 | 0.00312000  | 2.59056800  |
| N | 0.92147700  | -0.19736600 | 1.15318500  |
| C | 1.95762900  | 0.42741800  | 0.36773000  |
| C | 3.22899500  | 0.61434500  | 0.91108000  |
| C | 1.60738400  | 0.84039500  | -0.93178800 |
| C | 4.14871800  | 1.31658500  | 0.11764700  |
| C | 2.58285300  | 1.49489200  | -1.69576900 |
| H | 0.87218700  | -0.08195500 | -1.65078100 |
| C | 3.84100700  | 1.75804700  | -1.16220700 |
| H | 5.13953100  | 1.51171700  | 0.51951000  |
| H | 2.34056100  | 1.80921300  | -2.70749700 |
| H | 4.58513100  | 2.29717100  | -1.74186800 |
| C | 0.54137500  | -1.58119300 | 0.86611900  |
| H | -0.20466900 | -1.58977700 | 0.06630700  |
| H | 0.09437900  | -1.99464900 | 1.77161100  |
| C | 3.63314400  | 0.13143000  | 2.29179600  |
| H | 2.82430800  | -0.49722900 | 2.67326200  |
| C | 4.88853100  | -0.74839400 | 2.23034700  |
| H | 5.10591100  | -1.15564800 | 3.22309900  |
| H | 4.73395400  | -1.58943900 | 1.55034900  |
| H | 5.76867100  | -0.17907000 | 1.90657600  |
| C | 3.83341300  | 1.31384800  | 3.24985800  |
| H | 4.66852800  | 1.94750600  | 2.92738400  |
| H | 2.94034500  | 1.94521200  | 3.30320500  |
| H | 4.05922900  | 0.95147800  | 4.25847600  |
| C | 0.22111600  | 2.02068500  | 1.98455700  |
| C | 0.31823100  | 2.62520000  | 3.23179400  |
| C | 0.33921200  | 4.01174700  | 3.30847000  |
| H | 0.36487500  | 2.00318300  | 4.11817400  |
| C | 0.08242400  | 4.07642800  | 0.93260600  |
| C | 0.21604500  | 4.75029600  | 2.13748400  |
| H | 0.43119600  | 4.50665100  | 4.26955800  |

|    |             |             |             |
|----|-------------|-------------|-------------|
| H  | -0.06570500 | 4.60167000  | -0.00339400 |
| H  | 0.20307100  | 5.83392600  | 2.14970400  |
| N  | 0.10421800  | 2.73845200  | 0.85482500  |
| C  | -0.73785000 | -0.31663400 | -2.83041300 |
| C  | -2.18824300 | 1.44445400  | -3.16615500 |
| C  | -2.96409700 | 0.15613600  | -3.51780300 |
| C  | -1.85830000 | -0.91535000 | -3.64753300 |
| H  | -2.00010600 | 2.04981200  | -4.06280500 |
| H  | -3.64326100 | -0.09342000 | -2.69978600 |
| H  | -3.56164100 | 0.26682600  | -4.42333500 |
| H  | -2.13877300 | -1.89082300 | -3.24454100 |
| H  | -1.52307100 | -1.05966000 | -4.68118700 |
| N  | -0.91851900 | 0.95983600  | -2.64063300 |
| O  | 0.26082600  | -0.95527300 | -2.34095700 |
| C  | -2.85061900 | 2.38139600  | -2.13579500 |
| O  | -4.01528400 | 2.69528600  | -2.27018400 |
| O  | -2.05955900 | 2.82391200  | -1.18737200 |
| Pd | -0.28112000 | 1.85543400  | -1.01215000 |
| C  | 1.73644700  | -2.45846600 | 0.52168900  |
| O  | 2.59045800  | -2.74028100 | 1.34940700  |
| N  | 1.72743300  | -2.96013600 | -0.73545400 |
| H  | 1.13567600  | -2.52778400 | -1.43726600 |
| C  | 2.77948300  | -3.85745300 | -1.13719800 |
| H  | 2.87334600  | -4.67014800 | -0.41379300 |
| H  | 2.51707100  | -4.29437300 | -2.10514100 |
| C  | 4.16481200  | -3.23901900 | -1.26917600 |
| O  | 5.17998400  | -3.88412200 | -1.17866200 |
| O  | 4.12110700  | -1.93432800 | -1.56034300 |
| C  | 5.39556600  | -1.31848500 | -1.74578500 |
| H  | 6.02685200  | -1.93007600 | -2.39374400 |
| H  | 5.19116100  | -0.35009200 | -2.19807000 |
| H  | 5.88989800  | -1.18673400 | -0.77929700 |
| O  | -3.52537000 | -0.43613400 | 2.25594200  |
| H  | -2.67322400 | -0.02578000 | 2.48572800  |
| C  | -3.23977400 | -1.61063300 | 1.58196000  |
| H  | -2.26460500 | -2.02834800 | 1.85699700  |
| C  | -3.19005400 | -1.36480300 | 0.06700300  |
| F  | -2.39608000 | -0.30704100 | -0.18206900 |
| F  | -2.65286800 | -2.41401600 | -0.58768500 |
| F  | -4.38111200 | -1.11253100 | -0.47160200 |
| C  | -4.28732000 | -2.65394100 | 1.97343500  |
| F  | -4.11521900 | -3.78391100 | 1.26574000  |
| F  | -4.15303500 | -2.95781900 | 3.26849900  |
| F  | -5.53133000 | -2.22367500 | 1.77302700  |

**S-TS2-iso8**

|   |             |             |             |
|---|-------------|-------------|-------------|
| C | 1.36095300  | 1.56451900  | -1.68455300 |
| O | 1.29332400  | 1.59383200  | -2.90043800 |
| N | 0.66175700  | 0.68388500  | -0.90699600 |
| C | 0.70867500  | 0.72435900  | 0.52996300  |
| C | -0.17332400 | 1.54832800  | 1.23283900  |
| C | 1.68115800  | -0.07106200 | 1.16789100  |
| C | 0.00525100  | 1.61775800  | 2.62308000  |
| C | 1.78745300  | 0.00981000  | 2.56340800  |
| H | 1.73547800  | -1.38314100 | 0.74247500  |
| C | 0.97066100  | 0.87250300  | 3.28771300  |
| H | -0.64325800 | 2.27274300  | 3.19928000  |
| H | 2.52425800  | -0.60476500 | 3.07409200  |
| H | 1.07570100  | 0.96014000  | 4.36535100  |
| C | 0.17390900  | -0.52054900 | -1.56532300 |
| H | 0.95034900  | -1.29404400 | -1.54900500 |
| H | -0.03580800 | -0.26395700 | -2.60590100 |
| C | -1.27521800 | 2.35511800  | 0.57062300  |
| H | -1.30968600 | 2.06425100  | -0.48231200 |
| C | -2.64585800 | 2.02809700  | 1.17738200  |
| H | -3.44314500 | 2.48360300  | 0.58514000  |
| H | -2.82159600 | 0.94873200  | 1.18541900  |
| H | -2.73438100 | 2.40251800  | 2.20480800  |
| C | -0.98724700 | 3.86034700  | 0.65010600  |
| H | -0.96888000 | 4.20589600  | 1.69081200  |
| H | -0.02061700 | 4.10882300  | 0.20018900  |
| H | -1.76690900 | 4.42220000  | 0.12518500  |
| C | 2.30240400  | 2.53064400  | -0.99855500 |
| C | 2.22407200  | 3.88105600  | -1.31716500 |
| C | 3.16476700  | 4.75526100  | -0.79022200 |
| H | 1.43779000  | 4.21842900  | -1.98241000 |
| C | 4.22359200  | 2.87867300  | 0.24410700  |
| C | 4.18551400  | 4.24337200  | 0.00306100  |
| H | 3.11258300  | 5.81645600  | -1.01037000 |
| H | 5.02409000  | 2.42358900  | 0.81546600  |
| H | 4.95589500  | 4.88295900  | 0.41774500  |
| N | 3.29031100  | 2.03984300  | -0.22996400 |
| C | 2.99963500  | -2.84907600 | 0.20569900  |
| C | 5.23740700  | -2.37944700 | -0.09411700 |
| C | 4.95283100  | -3.69736300 | -0.84407200 |
| C | 3.60038400  | -4.15824400 | -0.25526900 |
| H | 5.85886800  | -2.55876300 | 0.79385500  |

|    |             |             |             |
|----|-------------|-------------|-------------|
| H  | 4.85213200  | -3.49099900 | -1.91392300 |
| H  | 5.75052900  | -4.43078900 | -0.72083000 |
| H  | 2.94494600  | -4.65993800 | -0.97090800 |
| H  | 3.72329000  | -4.82402400 | 0.60747600  |
| N  | 3.91679500  | -1.93397800 | 0.32749000  |
| O  | 1.75731800  | -2.62080800 | 0.43363600  |
| C  | 5.92293900  | -1.25257900 | -0.89391200 |
| O  | 6.90469000  | -1.50461800 | -1.56290200 |
| O  | 5.39706600  | -0.06205400 | -0.74329900 |
| Pd | 3.56627200  | -0.01216500 | 0.16111300  |
| C  | -1.10705000 | -1.02265700 | -0.93042200 |
| O  | -2.13247900 | -0.34727800 | -0.91310300 |
| N  | -1.06011700 | -2.26579800 | -0.41431700 |
| H  | -0.15466400 | -2.68232700 | -0.21868100 |
| C  | -2.24817100 | -2.80305300 | 0.20655900  |
| H  | -3.08918300 | -2.75098800 | -0.48621200 |
| H  | -2.06594600 | -3.85221700 | 0.45523600  |
| C  | -2.66280200 | -2.07506900 | 1.47844500  |
| O  | -3.81241400 | -1.87492400 | 1.79259300  |
| O  | -1.61094800 | -1.73697000 | 2.22620700  |
| C  | -1.92848100 | -1.11917900 | 3.47576900  |
| H  | -2.59705200 | -1.75847300 | 4.05685200  |
| H  | -0.97464700 | -0.98658100 | 3.98237200  |
| H  | -2.40779300 | -0.15157800 | 3.30929400  |
| O  | -4.50122900 | 0.92557900  | -1.36869300 |
| H  | -3.58093800 | 0.61021700  | -1.37186700 |
| C  | -5.23534500 | 0.02061400  | -0.61124100 |
| H  | -4.66295900 | -0.42670200 | 0.21029600  |
| C  | -5.70804700 | -1.14584800 | -1.48703800 |
| F  | -4.63768200 | -1.70341700 | -2.08947800 |
| F  | -6.30039700 | -2.10451800 | -0.76387900 |
| F  | -6.55414100 | -0.76470000 | -2.44639700 |
| C  | -6.39121300 | 0.78704500  | 0.02843400  |
| F  | -7.21403700 | -0.03836100 | 0.69021200  |
| F  | -5.91068900 | 1.67518500  | 0.91283500  |
| F  | -7.11348700 | 1.45896100  | -0.87048500 |

### S-TS2-iso9

|   |             |            |             |
|---|-------------|------------|-------------|
| C | 1.96219400  | 1.70864900 | -1.73485700 |
| O | 2.22228600  | 1.87199100 | -2.91436100 |
| N | 1.14949400  | 0.71707000 | -1.26546400 |
| C | 0.81084600  | 0.60025200 | 0.12672900  |
| C | -0.28236700 | 1.30268200 | 0.63948900  |

|   |             |             |             |
|---|-------------|-------------|-------------|
| C | 1.63599800  | -0.21534200 | 0.92646400  |
| C | -0.48536900 | 1.22266200  | 2.02578800  |
| C | 1.36169000  | -0.28680800 | 2.29986100  |
| H | 1.90193700  | -1.47097700 | 0.41230800  |
| C | 0.31942400  | 0.44988400  | 2.85327400  |
| H | -1.30999300 | 1.77956100  | 2.46345300  |
| H | 1.98167700  | -0.91867900 | 2.93064900  |
| H | 0.12556800  | 0.41807000  | 3.92182300  |
| C | 0.93403700  | -0.42261800 | -2.14804200 |
| H | 1.74063300  | -1.15300000 | -2.01149400 |
| H | 0.97720100  | -0.05158600 | -3.17395200 |
| C | -1.21335200 | 2.14593100  | -0.21284300 |
| H | -0.94409400 | 1.98111300  | -1.25940000 |
| C | -2.67313100 | 1.70523400  | -0.05280300 |
| H | -3.31476000 | 2.28341100  | -0.72331600 |
| H | -2.79477700 | 0.65272400  | -0.31546600 |
| H | -3.04387100 | 1.86202900  | 0.96740200  |
| C | -1.05118400 | 3.63731900  | 0.11263500  |
| H | -1.35217500 | 3.85146700  | 1.14527400  |
| H | -0.01351400 | 3.96609800  | -0.00556300 |
| H | -1.68139200 | 4.24075800  | -0.54920700 |
| C | 2.61214100  | 2.63681400  | -0.73127700 |
| C | 2.52129000  | 4.00899100  | -0.93376200 |
| C | 3.22799400  | 4.86338100  | -0.09924600 |
| H | 1.91063600  | 4.37924000  | -1.74892000 |
| C | 4.11491800  | 2.93773800  | 1.00354100  |
| C | 4.04390300  | 4.31703700  | 0.88538400  |
| H | 3.15865900  | 5.93842100  | -0.22901800 |
| H | 4.77035000  | 2.46072100  | 1.72271200  |
| H | 4.63475800  | 4.94263900  | 1.54413900  |
| N | 3.39878200  | 2.11288200  | 0.22458800  |
| C | 3.37490300  | -2.80499000 | 0.13101500  |
| C | 5.56580900  | -2.19300400 | 0.51089100  |
| C | 5.60212100  | -3.44360200 | -0.39177400 |
| C | 4.17909700  | -4.02911500 | -0.24798700 |
| H | 5.93251600  | -2.42532200 | 1.52017500  |
| H | 5.78750300  | -3.13885100 | -1.42616700 |
| H | 6.38796300  | -4.14352100 | -0.10553800 |
| H | 3.78683500  | -4.48829700 | -1.15835300 |
| H | 4.11026700  | -4.77146800 | 0.55631600  |
| N | 4.15020600  | -1.86125900 | 0.57956600  |
| O | 2.10407200  | -2.66555100 | 0.02049300  |
| C | 6.35492600  | -0.95790100 | 0.02957200  |
| O | 7.49546500  | -1.09318300 | -0.36630400 |

|    |             |             |             |
|----|-------------|-------------|-------------|
| O  | 5.72246800  | 0.18390500  | 0.13681000  |
| Pd | 3.71194900  | 0.04725000  | 0.49113800  |
| C  | -0.42674900 | -1.06196700 | -1.93098800 |
| O  | -1.47384800 | -0.46091100 | -2.11316800 |
| N  | -0.39093400 | -2.37318700 | -1.57093700 |
| H  | 0.45771400  | -2.74690700 | -1.15814200 |
| C  | -1.64275500 | -3.04662300 | -1.35089800 |
| H  | -2.27691800 | -2.96956800 | -2.23630200 |
| H  | -1.44709300 | -4.10602500 | -1.15953300 |
| C  | -2.45804200 | -2.50626700 | -0.18683200 |
| O  | -3.67263600 | -2.56456600 | -0.16100700 |
| O  | -1.70531300 | -2.04814300 | 0.80109200  |
| C  | -2.39348600 | -1.60406600 | 1.97633700  |
| H  | -3.13507400 | -2.34423300 | 2.28522500  |
| H  | -1.62187400 | -1.48644900 | 2.73365600  |
| H  | -2.88357500 | -0.64678600 | 1.78594400  |
| O  | -5.32094100 | -0.68275800 | 0.94882900  |
| H  | -4.72750200 | -1.38032200 | 0.60814000  |
| C  | -6.40807200 | -0.59035900 | 0.09089200  |
| H  | -6.67519500 | -1.55264300 | -0.36453400 |
| C  | -6.09850000 | 0.36448800  | -1.06950600 |
| F  | -4.98383000 | -0.04582800 | -1.68788100 |
| F  | -7.08837200 | 0.37510000  | -1.97364900 |
| F  | -5.90318500 | 1.62151700  | -0.65608700 |
| C  | -7.61213700 | -0.15003500 | 0.92414200  |
| F  | -8.69355000 | 0.02992000  | 0.15182100  |
| F  | -7.90547700 | -1.09643600 | 1.82452000  |
| F  | -7.37827800 | 0.98682500  | 1.58247500  |

### S-TS3-iso1

|   |             |             |             |
|---|-------------|-------------|-------------|
| C | 0.46387200  | -0.84370500 | -1.62072700 |
| O | -0.31942700 | -0.28971900 | -2.38621200 |
| N | 1.58997300  | -0.27387700 | -1.12931300 |
| C | 2.46183200  | -0.98640100 | -0.22996700 |
| C | 3.49782700  | -1.77414300 | -0.73104400 |
| C | 2.19545200  | -0.86296100 | 1.14984900  |
| C | 4.23148900  | -2.51463300 | 0.20957400  |
| C | 2.98864900  | -1.59516400 | 2.04503000  |
| H | 1.99541200  | 0.41071500  | 1.59044300  |
| C | 3.98821500  | -2.44010600 | 1.57453800  |
| H | 5.02538400  | -3.16550500 | -0.14731800 |
| H | 2.80786200  | -1.49883800 | 3.11224600  |
| H | 4.58429400  | -3.03146400 | 2.26359300  |

|    |             |             |             |
|----|-------------|-------------|-------------|
| C  | 1.71697500  | 1.18083600  | -1.21869300 |
| H  | 1.18813200  | 1.64340700  | -0.38107700 |
| H  | 1.24029800  | 1.51402600  | -2.13996600 |
| C  | 3.83693800  | -1.88430900 | -2.20629700 |
| H  | 3.21153500  | -1.16852400 | -2.74593400 |
| C  | 5.29686200  | -1.49143400 | -2.46980700 |
| H  | 5.49661900  | -1.50791000 | -3.54614000 |
| H  | 5.49310700  | -0.47972500 | -2.10807000 |
| H  | 5.99607300  | -2.19018900 | -1.99348400 |
| C  | 3.54560500  | -3.29645500 | -2.73364400 |
| H  | 4.19698800  | -4.03950000 | -2.25781100 |
| H  | 2.50925100  | -3.59336900 | -2.54414100 |
| H  | 3.72438800  | -3.34206500 | -3.81312300 |
| C  | 0.13156400  | -2.25522000 | -1.19429900 |
| C  | -0.09984500 | -3.21953000 | -2.16491400 |
| C  | -0.50768200 | -4.48706200 | -1.77030800 |
| H  | 0.02954400  | -2.95983300 | -3.20896400 |
| C  | -0.50106700 | -3.71096700 | 0.48907500  |
| C  | -0.71268100 | -4.73621600 | -0.41959400 |
| H  | -0.68469000 | -5.26074400 | -2.50987500 |
| H  | -0.69174100 | -3.84109800 | 1.54743500  |
| H  | -1.06085800 | -5.69942800 | -0.06608100 |
| N  | -0.06885800 | -2.49948300 | 0.11264700  |
| C  | 0.79448900  | 1.55790200  | 2.74478000  |
| C  | -1.16056600 | 0.67209900  | 3.59757000  |
| C  | -1.29151700 | 2.20692800  | 3.69615000  |
| C  | 0.14950500  | 2.71454900  | 3.47174500  |
| H  | -1.09252300 | 0.21084500  | 4.59247400  |
| H  | -1.95216800 | 2.56637100  | 2.90530600  |
| H  | -1.71369000 | 2.52468600  | 4.65022600  |
| H  | 0.20848200  | 3.62422000  | 2.87107000  |
| H  | 0.68642200  | 2.89493100  | 4.41014600  |
| N  | 0.09371500  | 0.46534100  | 2.88344800  |
| O  | 1.87543000  | 1.60526100  | 2.06480600  |
| C  | -2.26897800 | -0.07677400 | 2.84491700  |
| O  | -3.44282500 | 0.25446100  | 2.97795400  |
| O  | -1.87379700 | -1.07370300 | 2.11387900  |
| Pd | 0.12050900  | -1.01484300 | 1.59025700  |
| C  | 3.17055800  | 1.62296400  | -1.27535300 |
| O  | 3.90493300  | 1.32166900  | -2.20460100 |
| N  | 3.55845000  | 2.42744800  | -0.25687500 |
| H  | 2.99940000  | 2.46034400  | 0.58822500  |
| C  | 4.90203000  | 2.94390400  | -0.24519100 |
| H  | 5.12541900  | 3.42649900  | -1.19898000 |

|   |             |             |             |
|---|-------------|-------------|-------------|
| H | 4.98046400  | 3.69995700  | 0.54159600  |
| C | 6.00402100  | 1.91920500  | -0.01210000 |
| O | 7.14529500  | 2.09427900  | -0.36085500 |
| O | 5.58130800  | 0.85141500  | 0.67558900  |
| C | 6.59594200  | -0.10813200 | 0.97024500  |
| H | 7.47127700  | 0.37887100  | 1.40546800  |
| H | 6.14549700  | -0.80387200 | 1.67563000  |
| H | 6.89301900  | -0.63253200 | 0.05795700  |
| O | -1.00382300 | 2.38106900  | -2.40646400 |
| H | -0.95031000 | 1.40753400  | -2.47315500 |
| C | -2.07244300 | 2.75303500  | -1.60652500 |
| H | -3.00074100 | 2.22067600  | -1.83948700 |
| C | -2.33064700 | 4.23769900  | -1.86833200 |
| F | -2.66872700 | 4.41804300  | -3.14641000 |
| F | -3.33646200 | 4.68674800  | -1.10445600 |
| F | -1.25228500 | 4.98446800  | -1.61223800 |
| C | -1.76901100 | 2.46379900  | -0.13150100 |
| F | -2.78463400 | 2.77274400  | 0.67490400  |
| F | -1.51844700 | 1.14499600  | 0.01345200  |
| F | -0.67928800 | 3.11195300  | 0.31501300  |
| O | -4.98863700 | -1.09131100 | 1.13300600  |
| H | -4.52146900 | -0.64409700 | 1.87473500  |
| C | -4.10824100 | -1.16267400 | 0.06852600  |
| H | -3.09349200 | -0.85590200 | 0.33924400  |
| C | -4.56974200 | -0.22898900 | -1.05179600 |
| F | -4.68674000 | 1.02083700  | -0.57075700 |
| F | -3.66842900 | -0.17829200 | -2.05557900 |
| F | -5.74454200 | -0.57317300 | -1.57968800 |
| C | -3.99824800 | -2.61633100 | -0.38840500 |
| F | -3.13692000 | -2.73647700 | -1.42078200 |
| F | -3.52721600 | -3.37730900 | 0.61032300  |
| F | -5.16499600 | -3.13447000 | -0.77613600 |

### S-TS3-iso2

|   |             |             |             |
|---|-------------|-------------|-------------|
| C | 0.29223800  | -1.28647900 | -0.33744300 |
| O | -0.43100300 | -1.63756900 | -1.26368500 |
| N | 1.62169300  | -1.07227300 | -0.49426300 |
| C | 2.50127700  | -0.82719000 | 0.61410500  |
| C | 3.01468300  | -1.89639800 | 1.34881900  |
| C | 2.79160100  | 0.51681500  | 0.91645900  |
| C | 3.78978600  | -1.56607000 | 2.47168100  |
| C | 3.60530800  | 0.78597200  | 2.02756800  |
| H | 3.13923400  | 1.31092800  | -0.15252500 |



|    |             |             |             |
|----|-------------|-------------|-------------|
| C  | 4.08481800  | -0.25328900 | 2.81700500  |
| H  | 4.17987300  | -2.37123100 | 3.08869500  |
| H  | 3.84602500  | 1.81763400  | 2.26996900  |
| H  | 4.69006100  | -0.04704300 | 3.69505400  |
| C  | 2.11457100  | -0.84237900 | -1.84980600 |
| H  | 2.08306500  | 0.23210000  | -2.06386300 |
| H  | 1.43655600  | -1.35356200 | -2.53489200 |
| C  | 2.75463700  | -3.35289300 | 1.01004600  |
| H  | 2.23477600  | -3.38483400 | 0.04925300  |
| C  | 4.07136600  | -4.11876900 | 0.82556700  |
| H  | 3.86212000  | -5.14692100 | 0.51337100  |
| H  | 4.68037000  | -3.64976800 | 0.04903500  |
| H  | 4.64761300  | -4.16815900 | 1.75799800  |
| C  | 1.86917100  | -4.01524400 | 2.07452800  |
| H  | 2.37211100  | -4.04132500 | 3.04878600  |
| H  | 0.92169700  | -3.48159500 | 2.20299300  |
| H  | 1.64278600  | -5.04790500 | 1.78955500  |
| C  | -0.33598100 | -1.03172800 | 1.01552500  |
| C  | -1.26047600 | -1.95032400 | 1.49848100  |
| C  | -1.96058100 | -1.65924400 | 2.66229700  |
| H  | -1.45942700 | -2.85758200 | 0.93824100  |
| C  | -0.81019600 | 0.43065900  | 2.74763800  |
| C  | -1.73104000 | -0.44642900 | 3.29810000  |
| H  | -2.69686300 | -2.35785600 | 3.04138400  |
| H  | -0.62987500 | 1.40700200  | 3.18272200  |
| H  | -2.27181700 | -0.16291600 | 4.19330500  |
| N  | -0.11638700 | 0.14437800  | 1.63470200  |
| C  | 2.80989900  | 3.13782000  | -0.92971900 |
| C  | 1.16193100  | 4.49346500  | -0.05204400 |
| C  | 1.44881500  | 5.00444000  | -1.47852800 |
| C  | 2.81607900  | 4.36788700  | -1.80998400 |
| H  | 1.51826200  | 5.20814400  | 0.70272100  |
| H  | 0.67883300  | 4.62914900  | -2.15941300 |
| H  | 1.44885500  | 6.09314000  | -1.54170000 |
| H  | 2.94415300  | 4.09857000  | -2.86050400 |
| H  | 3.65693800  | 5.01137000  | -1.52447600 |
| N  | 1.94112700  | 3.26312200  | 0.03673300  |
| O  | 3.52511300  | 2.08965300  | -1.09012900 |
| C  | -0.30000900 | 4.18009600  | 0.29305700  |
| O  | -1.18759100 | 4.96346900  | -0.02358500 |
| O  | -0.49509800 | 3.08137100  | 0.95677700  |
| Pd | 1.05872300  | 1.72845300  | 0.89006400  |
| C  | 3.51075400  | -1.41161400 | -2.05597600 |
| O  | 3.74440900  | -2.60670400 | -1.96763500 |

|   |             |             |             |
|---|-------------|-------------|-------------|
| N | 4.44862500  | -0.49595000 | -2.40626600 |
| H | 4.27023500  | 0.48537900  | -2.22771700 |
| C | 5.79648600  | -0.93440800 | -2.66006800 |
| H | 5.79090400  | -1.76115900 | -3.37333200 |
| H | 6.35585900  | -0.10846000 | -3.10926200 |
| C | 6.58156200  | -1.41643000 | -1.44744300 |
| O | 7.54879400  | -2.13082700 | -1.53972900 |
| O | 6.12166600  | -0.91267800 | -0.29637200 |
| C | 6.86165300  | -1.30119100 | 0.86182200  |
| H | 7.93110100  | -1.14805300 | 0.70247600  |
| H | 6.49228100  | -0.67255300 | 1.66950800  |
| H | 6.67855800  | -2.35544300 | 1.08635800  |
| O | -2.70321100 | -3.17863900 | -1.10992300 |
| H | -1.95538600 | -2.58701200 | -1.32237200 |
| C | -3.79537900 | -2.39115800 | -0.76586400 |
| H | -3.52003400 | -1.49450700 | -0.20053000 |
| C | -4.68591000 | -3.23123600 | 0.14566300  |
| F | -4.01516600 | -3.53173700 | 1.27914300  |
| F | -5.78763000 | -2.56058100 | 0.49964400  |
| F | -5.05364000 | -4.38224400 | -0.41229100 |
| C | -4.52762300 | -1.89867300 | -2.02148500 |
| F | -5.46922200 | -0.99999800 | -1.70941600 |
| F | -3.64307900 | -1.31069900 | -2.83731100 |
| F | -5.11043800 | -2.89289100 | -2.69822500 |
| O | -3.64944600 | 3.66444500  | -0.02209800 |
| H | -2.83333700 | 4.21174100  | 0.02389100  |
| C | -3.29291500 | 2.35180400  | 0.23371700  |
| H | -2.44116400 | 2.27510000  | 0.91709900  |
| C | -2.85596000 | 1.65211400  | -1.05748400 |
| F | -1.88909900 | 2.36230000  | -1.65829000 |
| F | -2.33352600 | 0.43211500  | -0.79174600 |
| F | -3.84543100 | 1.48762200  | -1.93243400 |
| C | -4.46790100 | 1.65662700  | 0.91416300  |
| F | -4.17546500 | 0.35502400  | 1.15881400  |
| F | -4.70618000 | 2.22790200  | 2.10043000  |
| F | -5.58957700 | 1.69033600  | 0.20140900  |

### S-TS3-iso3

|   |             |             |             |
|---|-------------|-------------|-------------|
| C | -0.70340700 | -1.39146700 | -0.73894400 |
| O | -0.87260300 | -1.77394300 | -1.88245900 |
| N | 0.27221100  | -0.50590700 | -0.37546900 |
| C | 0.52174700  | -0.14643600 | 0.99307700  |
| C | 1.38798500  | -0.91412200 | 1.76972300  |

|   |             |             |             |
|---|-------------|-------------|-------------|
| C | -0.14624900 | 0.98917100  | 1.49655700  |
| C | 1.54564400  | -0.52556900 | 3.10935100  |
| C | 0.07038200  | 1.34517800  | 2.83631300  |
| H | -0.05789400 | 2.11161200  | 0.70414200  |
| C | 0.90889800  | 0.58475800  | 3.64353800  |
| H | 2.20344100  | -1.11120600 | 3.74582100  |
| H | -0.42289300 | 2.22711000  | 3.23618900  |
| H | 1.07264300  | 0.85580000  | 4.68182800  |
| C | 0.84681700  | 0.30822800  | -1.44059600 |
| H | 0.23662400  | 1.20675800  | -1.59072200 |
| H | 0.82080100  | -0.28453600 | -2.35713900 |
| C | 2.13533900  | -2.12286500 | 1.23901800  |
| H | 1.98628200  | -2.15159700 | 0.15631100  |
| C | 3.64281300  | -1.99889000 | 1.48797300  |
| H | 4.18829200  | -2.76999500 | 0.93815700  |
| H | 4.00414900  | -1.02575700 | 1.14737300  |
| H | 3.88856200  | -2.10609200 | 2.55139400  |
| C | 1.58414300  | -3.42266100 | 1.84019400  |
| H | 1.73516500  | -3.44957700 | 2.92612700  |
| H | 0.51135600  | -3.53160400 | 1.65086900  |
| H | 2.09872800  | -4.28818200 | 1.40953300  |
| C | -1.64475100 | -1.89999600 | 0.33182200  |
| C | -1.89892000 | -3.26529200 | 0.38706300  |
| C | -2.87657600 | -3.73922900 | 1.24879900  |
| H | -1.34612900 | -3.92551700 | -0.27056400 |
| C | -3.30577100 | -1.47918400 | 1.88787600  |
| C | -3.59962700 | -2.82698500 | 2.00866500  |
| H | -3.08946300 | -4.80125400 | 1.30820500  |
| H | -3.86411400 | -0.72674600 | 2.43309800  |
| H | -4.39760800 | -3.14418100 | 2.66900500  |
| N | -2.33611900 | -1.02192500 | 1.07922700  |
| C | -1.17323500 | 3.60904500  | -0.05179700 |
| C | -3.46427200 | 3.58767700  | 0.18917400  |
| C | -3.14961700 | 4.53157900  | -0.98930700 |
| C | -1.64390500 | 4.82686100  | -0.81394400 |
| H | -3.83671700 | 4.14874700  | 1.05743400  |
| H | -3.32831300 | 4.00625600  | -1.93221100 |
| H | -3.77121600 | 5.42772700  | -0.98452700 |
| H | -1.09716100 | 4.93734500  | -1.75302300 |
| H | -1.45916000 | 5.72467800  | -0.21222900 |
| N | -2.17236400 | 2.99374800  | 0.51499500  |
| O | 0.03515500  | 3.19144500  | 0.02997600  |
| C | -4.47561300 | 2.46178600  | -0.06852600 |
| O | -5.50884200 | 2.69843300  | -0.68561800 |

|    |             |             |             |
|----|-------------|-------------|-------------|
| O  | -4.17187700 | 1.31097400  | 0.44428400  |
| Pd | -2.17360900 | 1.06464200  | 0.91279300  |
| C  | 2.28893300  | 0.67710500  | -1.14423400 |
| O  | 3.17976200  | -0.16729600 | -1.09215600 |
| N  | 2.53201900  | 1.99135200  | -0.96684400 |
| H  | 1.74991500  | 2.61518300  | -0.79438200 |
| C  | 3.85897400  | 2.41121400  | -0.59469700 |
| H  | 4.59035500  | 2.02759900  | -1.30850100 |
| H  | 3.90530300  | 3.50353000  | -0.61857000 |
| C  | 4.21541900  | 1.94100600  | 0.81236400  |
| O  | 3.42072000  | 1.75138800  | 1.69836800  |
| O  | 5.53777500  | 1.77846200  | 0.92886200  |
| C  | 6.00515500  | 1.31211300  | 2.19922200  |
| H  | 5.51089100  | 0.37363500  | 2.46018000  |
| H  | 7.07442900  | 1.15545200  | 2.07110100  |
| H  | 5.80686800  | 2.05711600  | 2.97302400  |
| O  | 5.30536100  | -1.87003500 | -1.39965000 |
| H  | 4.41261400  | -1.48337400 | -1.42283800 |
| C  | 6.16052100  | -0.85852500 | -0.98684300 |
| H  | 5.66606200  | -0.11835100 | -0.35095900 |
| C  | 6.70059700  | -0.08176600 | -2.19391600 |
| F  | 5.66459300  | 0.34804800  | -2.93595400 |
| F  | 7.39003700  | 1.00389400  | -1.80960000 |
| F  | 7.48796100  | -0.81938300 | -2.97781300 |
| C  | 7.26548600  | -1.48317000 | -0.13786800 |
| F  | 8.18701700  | -0.56435600 | 0.20313700  |
| F  | 6.74525200  | -1.96287300 | 1.00345400  |
| F  | 7.88755000  | -2.48334100 | -0.75761800 |
| O  | -6.75338600 | 0.35351700  | -1.47614700 |
| H  | -6.37335200 | 1.21481500  | -1.19167900 |
| C  | -6.01676900 | -0.66094400 | -0.88757700 |
| H  | -5.45942600 | -0.31747300 | -0.01022400 |
| C  | -4.96689800 | -1.18401600 | -1.87237600 |
| F  | -4.15065900 | -0.18104700 | -2.22990600 |
| F  | -4.20096800 | -2.14311600 | -1.31392900 |
| F  | -5.50224500 | -1.69238600 | -2.98389800 |
| C  | -6.97938000 | -1.74325600 | -0.40769300 |
| F  | -6.31246200 | -2.75934600 | 0.18273500  |
| F  | -7.81193300 | -1.23435100 | 0.50916100  |
| F  | -7.71558100 | -2.26329600 | -1.39112600 |

### S-TS3-iso3

|   |             |             |             |
|---|-------------|-------------|-------------|
| C | -0.61888000 | -1.40609800 | -0.60031100 |
|---|-------------|-------------|-------------|

|   |             |             |             |
|---|-------------|-------------|-------------|
| O | -0.75308000 | -1.87307500 | -1.71587800 |
| N | 0.32065300  | -0.46224400 | -0.28558600 |
| C | 0.53488700  | -0.00916500 | 1.05941800  |
| C | 1.39912700  | -0.70856800 | 1.90390500  |
| C | -0.17279200 | 1.13645900  | 1.47528900  |
| C | 1.47807000  | -0.25958600 | 3.23156700  |
| C | -0.02440600 | 1.56340300  | 2.80393400  |
| H | -0.10374600 | 2.19975600  | 0.61028400  |
| C | 0.78151400  | 0.85272400  | 3.68667700  |
| H | 2.11664400  | -0.80096700 | 3.92480200  |
| H | -0.55344700 | 2.45210900  | 3.13774600  |
| H | 0.87659200  | 1.16396500  | 4.72294900  |
| C | 0.86845100  | 0.31073400  | -1.39254900 |
| H | 0.23532600  | 1.18397800  | -1.58827100 |
| H | 0.85476300  | -0.33053400 | -2.27655800 |
| C | 2.21741700  | -1.90690800 | 1.46039100  |
| H | 2.10405800  | -1.99933200 | 0.37739400  |
| C | 3.71008000  | -1.69748500 | 1.74596700  |
| H | 4.30198900  | -2.48313100 | 1.27048300  |
| H | 4.05451000  | -0.74096100 | 1.34261000  |
| H | 3.92407300  | -1.71930000 | 2.82167300  |
| C | 1.70740400  | -3.19819100 | 2.11414600  |
| H | 1.83049400  | -3.16540600 | 3.20347700  |
| H | 0.64566100  | -3.36408700 | 1.90395600  |
| H | 2.27124500  | -4.05892700 | 1.74017700  |
| C | -1.56905900 | -1.86509500 | 0.48484600  |
| C | -1.78858700 | -3.22960100 | 0.63102000  |
| C | -2.77977500 | -3.66861700 | 1.49581900  |
| H | -1.20095200 | -3.91858200 | 0.03598600  |
| C | -3.28602300 | -1.38175300 | 1.96026700  |
| C | -3.54908800 | -2.72531900 | 2.16751900  |
| H | -2.96800900 | -4.72916700 | 1.62380200  |
| H | -3.88013100 | -0.60841800 | 2.43384600  |
| H | -4.35909100 | -3.01755900 | 2.82471200  |
| N | -2.30474900 | -0.95574100 | 1.14834400  |
| C | -1.23287800 | 3.61873000  | -0.26958400 |
| C | -3.52898500 | 3.55286200  | -0.07758000 |
| C | -3.20992100 | 4.42297000  | -1.31068700 |
| C | -1.71676100 | 4.76934600  | -1.12269500 |
| H | -3.93724700 | 4.16150500  | 0.74106000  |
| H | -3.35385700 | 3.83138600  | -2.21964900 |
| H | -3.85367000 | 5.30054300  | -1.37954500 |
| H | -1.15062700 | 4.83042700  | -2.05478100 |
| H | -1.56918300 | 5.71054800  | -0.58005200 |

|    |             |             |             |
|----|-------------|-------------|-------------|
| N  | -2.23046100 | 3.01801000  | 0.31759300  |
| O  | -0.01746300 | 3.23846600  | -0.13624100 |
| C  | -4.50304900 | 2.38394700  | -0.27954900 |
| O  | -5.52785500 | 2.54469700  | -0.93217900 |
| O  | -4.18016500 | 1.27894500  | 0.31911200  |
| Pd | -2.19281300 | 1.11991700  | 0.84080800  |
| C  | 2.30212000  | 0.72515900  | -1.12662600 |
| O  | 3.19944400  | -0.09907100 | -0.97594700 |
| N  | 2.53667600  | 2.05134500  | -1.09432100 |
| H  | 1.75494700  | 2.68781600  | -0.97504100 |
| C  | 3.88354500  | 2.51175100  | -0.84971500 |
| H  | 4.57127600  | 2.05354200  | -1.56161700 |
| H  | 3.91083000  | 3.59639500  | -0.98615100 |
| C  | 4.40217000  | 2.19202900  | 0.54607100  |
| O  | 5.54101300  | 1.86264600  | 0.77928100  |
| O  | 3.46735600  | 2.37191000  | 1.48158500  |
| C  | 3.90686900  | 2.15691800  | 2.82508100  |
| H  | 4.79685800  | 2.75397900  | 3.03544700  |
| H  | 3.07331200  | 2.46066300  | 3.45557700  |
| H  | 4.13487400  | 1.09988200  | 2.98213400  |
| O  | 5.25519200  | -1.88658000 | -1.20586900 |
| H  | 4.41011200  | -1.40540600 | -1.22208600 |
| C  | 6.24426300  | -0.96416100 | -0.88555900 |
| H  | 5.89899000  | -0.16734500 | -0.21597900 |
| C  | 6.75280100  | -0.26817900 | -2.15361300 |
| F  | 5.70712000  | 0.29821900  | -2.79190200 |
| F  | 7.62318600  | 0.70916600  | -1.87231600 |
| F  | 7.33405000  | -1.11070400 | -3.00946100 |
| C  | 7.34792300  | -1.71423100 | -0.14208100 |
| F  | 8.38718900  | -0.91040500 | 0.12227500  |
| F  | 6.87696300  | -2.16631600 | 1.03086900  |
| F  | 7.80042300  | -2.76390300 | -0.83045500 |
| O  | -6.68162100 | 0.09815300  | -1.55544700 |
| H  | -6.33075200 | 0.98797100  | -1.32821300 |
| C  | -5.90472600 | -0.85569800 | -0.91969800 |
| H  | -5.37351200 | -0.45255600 | -0.05160300 |
| C  | -4.82222700 | -1.37207200 | -1.87259700 |
| F  | -4.04928700 | -0.34834800 | -2.26783600 |
| F  | -4.01849600 | -2.26835300 | -1.26591400 |
| F  | -5.32280500 | -1.95248700 | -2.96432800 |
| C  | -6.82475300 | -1.95955500 | -0.40601600 |
| F  | -6.11947900 | -2.92701500 | 0.22051700  |
| F  | -7.68052600 | -1.45383300 | 0.49124600  |
| F  | -7.53486100 | -2.54133400 | -1.37310100 |

### S-TS3-iso4

|   |             |             |             |
|---|-------------|-------------|-------------|
| C | -1.46025200 | 2.42026900  | 1.01063100  |
| O | -2.10544500 | 2.66795200  | 2.01404400  |
| N | -0.10308300 | 2.27649300  | 1.00645000  |
| C | 0.65128800  | 2.04739400  | -0.19309800 |
| C | 1.17263700  | 3.12550300  | -0.90989500 |
| C | 0.83237400  | 0.70980900  | -0.59773000 |
| C | 1.87718500  | 2.82067500  | -2.08525100 |
| C | 1.55154200  | 0.46461200  | -1.77688800 |
| H | 1.25319900  | -0.12466200 | 0.42785900  |
| C | 2.07270100  | 1.51775400  | -2.51959600 |
| H | 2.28279800  | 3.63831800  | -2.67501800 |
| H | 1.70280500  | -0.55631600 | -2.10885900 |
| H | 2.62676900  | 1.32284400  | -3.43276200 |
| C | 0.53212300  | 2.05444300  | 2.30514000  |
| H | 0.44385400  | 0.99547700  | 2.57700600  |
| H | -0.01351900 | 2.64441600  | 3.04345200  |
| C | 0.95973800  | 4.57378000  | -0.50873600 |
| H | 0.54801200  | 4.57934200  | 0.50337400  |
| C | 2.27695500  | 5.35731900  | -0.46320200 |
| H | 2.09447800  | 6.36427700  | -0.07368200 |
| H | 2.99167800  | 4.86389300  | 0.19918800  |
| H | 2.72431100  | 5.46554900  | -1.45876300 |
| C | -0.04791200 | 5.24385700  | -1.45434100 |
| H | 0.34141100  | 5.28402200  | -2.47896500 |
| H | -0.99847300 | 4.70109900  | -1.48100800 |
| H | -0.24804800 | 6.27140000  | -1.13182800 |
| C | -2.21662300 | 2.25040100  | -0.29149700 |
| C | -3.15286000 | 3.22164200  | -0.62888900 |
| C | -3.98537500 | 3.01490800  | -1.71826800 |
| H | -3.23362700 | 4.10576100  | -0.00777500 |
| C | -2.93709400 | 0.89285500  | -2.02412600 |
| C | -3.88094400 | 1.82235600  | -2.42531900 |
| H | -4.72380500 | 3.75961600  | -1.99523800 |
| H | -2.83806400 | -0.06592700 | -2.52019400 |
| H | -4.53512400 | 1.59611100  | -3.25855100 |
| N | -2.10872700 | 1.10632400  | -0.98846700 |
| C | 1.00062600  | -1.98898300 | 1.15628800  |
| C | -0.68864700 | -3.31898100 | 0.33668700  |
| C | -0.24782300 | -3.93655400 | 1.68151600  |
| C | 1.10900800  | -3.25493900 | 1.96783600  |
| H | -0.41399200 | -3.96423700 | -0.50818900 |

|    |             |             |             |
|----|-------------|-------------|-------------|
| H  | -0.97869100 | -3.68076600 | 2.45385400  |
| H  | -0.17926300 | -5.02384200 | 1.63447100  |
| H  | 1.28439100  | -3.03090200 | 3.02240700  |
| H  | 1.96234300  | -3.83439100 | 1.60130400  |
| N  | 0.06911900  | -2.07604800 | 0.25471900  |
| O  | 1.71582500  | -0.92871000 | 1.30138600  |
| C  | -2.17979900 | -2.98478400 | 0.18064100  |
| O  | -3.03008800 | -3.77119700 | 0.58402900  |
| O  | -2.44020300 | -1.86808800 | -0.42449500 |
| Pd | -0.88478100 | -0.50243000 | -0.44926400 |
| C  | 1.98634300  | 2.50831000  | 2.30719800  |
| O  | 2.29726200  | 3.68543600  | 2.22083500  |
| N  | 2.89250000  | 1.50373600  | 2.46030700  |
| H  | 2.58339000  | 0.54827800  | 2.31834900  |
| C  | 4.29500200  | 1.77564200  | 2.34092900  |
| H  | 4.47609400  | 2.81430000  | 2.62981400  |
| H  | 4.87591500  | 1.13249200  | 3.00875500  |
| C  | 4.80587000  | 1.56865700  | 0.92569900  |
| O  | 4.10256200  | 1.27578300  | -0.02046700 |
| O  | 6.11834400  | 1.73609800  | 0.86535700  |
| C  | 6.73631200  | 1.51193300  | -0.40781000 |
| H  | 6.30377600  | 2.17475900  | -1.16095100 |
| H  | 7.79117400  | 1.73675900  | -0.26062000 |
| H  | 6.60561500  | 0.47088100  | -0.70964500 |
| O  | 4.61596100  | -0.88482700 | -1.64317400 |
| H  | 4.41201700  | 0.00018600  | -1.28348100 |
| C  | 4.02927600  | -1.81339500 | -0.79100600 |
| H  | 3.18390400  | -1.39567900 | -0.23556900 |
| C  | 5.03804400  | -2.28462900 | 0.26360000  |
| F  | 4.51195400  | -3.21951700 | 1.06991500  |
| F  | 6.15254100  | -2.77541700 | -0.27423100 |
| F  | 5.39216700  | -1.24234700 | 1.04220000  |
| C  | 3.48959000  | -2.97572900 | -1.62914200 |
| F  | 2.77822900  | -3.82309500 | -0.86097400 |
| F  | 2.66684100  | -2.52087600 | -2.58319200 |
| F  | 4.45649400  | -3.67357500 | -2.22332400 |
| O  | -5.48824900 | -2.51055600 | 0.80724800  |
| H  | -4.65240300 | -3.01882600 | 0.70613900  |
| C  | -5.30688100 | -1.25909800 | 0.24253100  |
| H  | -4.46705400 | -1.23553300 | -0.45914100 |
| C  | -4.97119100 | -0.23751600 | 1.33333400  |
| F  | -3.84348800 | -0.60649700 | 1.96075500  |
| F  | -4.75676800 | 0.98754100  | 0.81302800  |
| F  | -5.93120400 | -0.12318000 | 2.25294200  |



|   |             |             |             |
|---|-------------|-------------|-------------|
| C | -6.55935500 | -0.89640900 | -0.55057200 |
| F | -6.42694900 | 0.31121000  | -1.14239900 |
| F | -6.75235700 | -1.79297600 | -1.52587300 |
| F | -7.66229700 | -0.85706900 | 0.19907300  |

**S-TS3-iso5**

|   |             |             |             |
|---|-------------|-------------|-------------|
| C | -1.46025200 | 2.42026900  | 1.01063100  |
| O | -2.10544500 | 2.66795200  | 2.01404400  |
| N | -0.10308300 | 2.27649300  | 1.00645000  |
| C | 0.65128800  | 2.04739400  | -0.19309800 |
| C | 1.17263700  | 3.12550300  | -0.90989500 |
| C | 0.83237400  | 0.70980900  | -0.59773000 |
| C | 1.87718500  | 2.82067500  | -2.08525100 |
| C | 1.55154200  | 0.46461200  | -1.77688800 |
| H | 1.25319900  | -0.12466200 | 0.42785900  |
| C | 2.07270100  | 1.51775400  | -2.51959600 |
| H | 2.28279800  | 3.63831800  | -2.67501800 |
| H | 1.70280500  | -0.55631600 | -2.10885900 |
| H | 2.62676900  | 1.32284400  | -3.43276200 |
| C | 0.53212300  | 2.05444300  | 2.30514000  |
| H | 0.44385400  | 0.99547700  | 2.57700600  |
| H | -0.01351900 | 2.64441600  | 3.04345200  |
| C | 0.95973800  | 4.57378000  | -0.50873600 |
| H | 0.54801200  | 4.57934200  | 0.50337400  |
| C | 2.27695500  | 5.35731900  | -0.46320200 |
| H | 2.09447800  | 6.36427700  | -0.07368200 |
| H | 2.99167800  | 4.86389300  | 0.19918800  |
| H | 2.72431100  | 5.46554900  | -1.45876300 |
| C | -0.04791200 | 5.24385700  | -1.45434100 |
| H | 0.34141100  | 5.28402200  | -2.47896500 |
| H | -0.99847300 | 4.70109900  | -1.48100800 |
| H | -0.24804800 | 6.27140000  | -1.13182800 |
| C | -2.21662300 | 2.25040100  | -0.29149700 |
| C | -3.15286000 | 3.22164200  | -0.62888900 |
| C | -3.98537500 | 3.01490800  | -1.71826800 |
| H | -3.23362700 | 4.10576100  | -0.00777500 |
| C | -2.93709400 | 0.89285500  | -2.02412600 |
| C | -3.88094400 | 1.82235600  | -2.42531900 |
| H | -4.72380500 | 3.75961600  | -1.99523800 |
| H | -2.83806400 | -0.06592700 | -2.52019400 |
| H | -4.53512400 | 1.59611100  | -3.25855100 |
| N | -2.10872700 | 1.10632400  | -0.98846700 |
| C | 1.00062600  | -1.98898300 | 1.15628800  |

|    |             |             |             |
|----|-------------|-------------|-------------|
| C  | -0.68864700 | -3.31898100 | 0.33668700  |
| C  | -0.24782300 | -3.93655400 | 1.68151600  |
| C  | 1.10900800  | -3.25493900 | 1.96783600  |
| H  | -0.41399200 | -3.96423700 | -0.50818900 |
| H  | -0.97869100 | -3.68076600 | 2.45385400  |
| H  | -0.17926300 | -5.02384200 | 1.63447100  |
| H  | 1.28439100  | -3.03090200 | 3.02240700  |
| H  | 1.96234300  | -3.83439100 | 1.60130400  |
| N  | 0.06911900  | -2.07604800 | 0.25471900  |
| O  | 1.71582500  | -0.92871000 | 1.30138600  |
| C  | -2.17979900 | -2.98478400 | 0.18064100  |
| O  | -3.03008800 | -3.77119700 | 0.58402900  |
| O  | -2.44020300 | -1.86808800 | -0.42449500 |
| Pd | -0.88478100 | -0.50243000 | -0.44926400 |
| C  | 1.98634300  | 2.50831000  | 2.30719800  |
| O  | 2.29726200  | 3.68543600  | 2.22083500  |
| N  | 2.89250000  | 1.50373600  | 2.46030700  |
| H  | 2.58339000  | 0.54827800  | 2.31834900  |
| C  | 4.29500200  | 1.77564200  | 2.34092900  |
| H  | 4.47609400  | 2.81430000  | 2.62981400  |
| H  | 4.87591500  | 1.13249200  | 3.00875500  |
| C  | 4.80587000  | 1.56865700  | 0.92569900  |
| O  | 4.10256200  | 1.27578300  | -0.02046700 |
| O  | 6.11834400  | 1.73609800  | 0.86535700  |
| C  | 6.73631200  | 1.51193300  | -0.40781000 |
| H  | 6.30377600  | 2.17475900  | -1.16095100 |
| H  | 7.79117400  | 1.73675900  | -0.26062000 |
| H  | 6.60561500  | 0.47088100  | -0.70964500 |
| O  | 4.61596100  | -0.88482700 | -1.64317400 |
| H  | 4.41201700  | 0.00018600  | -1.28348100 |
| C  | 4.02927600  | -1.81339500 | -0.79100600 |
| H  | 3.18390400  | -1.39567900 | -0.23556900 |
| C  | 5.03804400  | -2.28462900 | 0.26360000  |
| F  | 4.51195400  | -3.21951700 | 1.06991500  |
| F  | 6.15254100  | -2.77541700 | -0.27423100 |
| F  | 5.39216700  | -1.24234700 | 1.04220000  |
| C  | 3.48959000  | -2.97572900 | -1.62914200 |
| F  | 2.77822900  | -3.82309500 | -0.86097400 |
| F  | 2.66684100  | -2.52087600 | -2.58319200 |
| F  | 4.45649400  | -3.67357500 | -2.22332400 |
| O  | -5.48824900 | -2.51055600 | 0.80724800  |
| H  | -4.65240300 | -3.01882600 | 0.70613900  |
| C  | -5.30688100 | -1.25909800 | 0.24253100  |
| H  | -4.46705400 | -1.23553300 | -0.45914100 |

|   |             |             |             |
|---|-------------|-------------|-------------|
| C | -4.97119100 | -0.23751600 | 1.33333400  |
| F | -3.84348800 | -0.60649700 | 1.96075500  |
| F | -4.75676800 | 0.98754100  | 0.81302800  |
| F | -5.93120400 | -0.12318000 | 2.25294200  |
| C | -6.55935500 | -0.89640900 | -0.55057200 |
| F | -6.42694900 | 0.31121000  | -1.14239900 |
| F | -6.75235700 | -1.79297600 | -1.52587300 |
| F | -7.66229700 | -0.85706900 | 0.19907300  |

### S-TS3-iso6

|   |             |             |             |
|---|-------------|-------------|-------------|
| C | 1.29218100  | -1.35985000 | 1.34063700  |
| O | 1.75548900  | -1.57957700 | 2.44436900  |
| N | 0.22083900  | -0.54016200 | 1.11605400  |
| C | -0.37712100 | -0.40970200 | -0.18083500 |
| C | -1.34229800 | -1.32714400 | -0.59972600 |
| C | 0.07222300  | 0.64528600  | -1.00016200 |
| C | -1.80099800 | -1.19977800 | -1.91985500 |
| C | -0.44749100 | 0.74591300  | -2.30045400 |
| H | 0.10353100  | 1.87408900  | -0.39230100 |
| C | -1.36411800 | -0.18941700 | -2.76827800 |
| H | -2.53272000 | -1.91497400 | -2.28661400 |
| H | -0.11809300 | 1.55904800  | -2.94204400 |
| H | -1.74847400 | -0.12913200 | -3.78246600 |
| C | -0.09049400 | 0.43880500  | 2.14899700  |
| H | 0.46557700  | 1.36430200  | 1.95763800  |
| H | 0.25045300  | 0.02238600  | 3.09891700  |
| C | -1.88325600 | -2.43313100 | 0.28709700  |
| H | -1.46347200 | -2.28931100 | 1.28610500  |
| C | -3.40692900 | -2.32754900 | 0.42056200  |
| H | -3.77571100 | -3.08792100 | 1.11675800  |
| H | -3.68895100 | -1.35070800 | 0.81679900  |
| H | -3.91485700 | -2.48300500 | -0.53822700 |
| C | -1.46178100 | -3.81393400 | -0.23369900 |
| H | -1.90895300 | -4.02154000 | -1.21338000 |
| H | -0.37462800 | -3.89200300 | -0.34058000 |
| H | -1.79615700 | -4.59552700 | 0.45649000  |
| C | 1.97247700  | -1.99511900 | 0.14662900  |
| C | 2.27691100  | -3.34996100 | 0.20598300  |
| C | 3.06028400  | -3.91434500 | -0.78943800 |
| H | 1.92463600  | -3.92649200 | 1.05307000  |
| C | 3.21584600  | -1.75240700 | -1.79086000 |
| C | 3.54753700  | -3.09668100 | -1.80282900 |
| H | 3.31061300  | -4.96947000 | -0.75976400 |

|    |              |             |             |
|----|--------------|-------------|-------------|
| H  | 3.59680200   | -1.06760500 | -2.53997500 |
| H  | 4.19666500   | -3.48104900 | -2.58030300 |
| N  | 2.42851500   | -1.21169400 | -0.84666700 |
| C  | 1.25578600   | 3.51309900  | -0.17167000 |
| C  | 3.42588500   | 3.51578800  | -0.95001500 |
| C  | 3.33100500   | 4.63251300  | 0.10922700  |
| C  | 1.81005100   | 4.85376200  | 0.25532000  |
| H  | 3.55080200   | 3.93522700  | -1.95802500 |
| H  | 3.75804400   | 4.27393300  | 1.05057500  |
| H  | 3.87453100   | 5.53216400  | -0.18158900 |
| H  | 1.48827100   | 5.10517500  | 1.26833600  |
| H  | 1.43284500   | 5.63174400  | -0.41906200 |
| N  | 2.13563500   | 2.84034700  | -0.86097800 |
| O  | 0.09359400   | 3.05580200  | 0.10781600  |
| C  | 4.53805200   | 2.47408300  | -0.76688500 |
| O  | 5.66292300   | 2.83118800  | -0.43399800 |
| O  | 4.20340000   | 1.24932700  | -1.03041300 |
| Pd | 2.17489600   | 0.87337100  | -0.94592900 |
| C  | -1.58353800  | 0.70921800  | 2.26082800  |
| O  | -2.38619800  | -0.15758200 | 2.56584300  |
| N  | -1.93514000  | 2.00890200  | 2.05895900  |
| H  | -1.29216800  | 2.61616500  | 1.56202200  |
| C  | -3.31793100  | 2.38426600  | 2.15363700  |
| H  | -3.76501900  | 1.90727100  | 3.02917400  |
| H  | -3.39850500  | 3.46658100  | 2.28990300  |
| C  | -4.19590500  | 2.01313300  | 0.96937500  |
| O  | -5.40094700  | 2.17673100  | 1.00789600  |
| O  | -3.52269900  | 1.55574600  | -0.07070300 |
| C  | -4.28759000  | 1.21400200  | -1.23440300 |
| H  | -4.97238700  | 2.02359600  | -1.49386400 |
| H  | -3.55256500  | 1.06110000  | -2.02033300 |
| H  | -4.85359500  | 0.29915000  | -1.05511300 |
| O  | -7.36750700  | 1.03159100  | -0.53478500 |
| H  | -6.72715600  | 1.48727700  | 0.04873000  |
| C  | -8.04337000  | 0.05935900  | 0.18395200  |
| H  | -8.43313000  | 0.41941800  | 1.14643400  |
| C  | -7.11440700  | -1.12060600 | 0.50386700  |
| F  | -6.11877700  | -0.68447900 | 1.29581000  |
| F  | -7.74497700  | -2.10642200 | 1.14811700  |
| F  | -6.55290800  | -1.63324900 | -0.59892600 |
| C  | -9.25672400  | -0.35141700 | -0.65334000 |
| F  | -9.99467700  | -1.26510300 | -0.00669500 |
| F  | -10.02986500 | 0.71362300  | -0.88074600 |
| F  | -8.89951400  | -0.86674100 | -1.83253900 |

|   |            |             |             |
|---|------------|-------------|-------------|
| O | 7.11694900 | 0.68804200  | 0.53805100  |
| H | 6.66739700 | 1.47562300  | 0.15877500  |
| C | 6.36746500 | -0.43438000 | 0.22700500  |
| H | 5.65583900 | -0.25001300 | -0.58413200 |
| C | 5.52716900 | -0.84462200 | 1.43992700  |
| F | 4.64821000 | 0.12979000  | 1.72697100  |
| F | 4.81692600 | -1.96353400 | 1.19297600  |
| F | 6.26247600 | -1.06456900 | 2.52963900  |
| C | 7.30837700 | -1.53842700 | -0.24950800 |
| F | 6.61497900 | -2.62901700 | -0.64342400 |
| F | 8.00576400 | -1.11199900 | -1.30862100 |
| F | 8.17486700 | -1.93018600 | 0.68744800  |

### S-TS3-iso7

|   |             |             |             |
|---|-------------|-------------|-------------|
| C | 0.09897100  | -1.44533500 | -0.19876000 |
| O | -0.57026100 | -1.71826800 | -1.19092500 |
| N | 1.45080400  | -1.39368000 | -0.23100100 |
| C | 2.26683800  | -1.22009900 | 0.93832200  |
| C | 2.65402800  | -2.32577600 | 1.69745500  |
| C | 2.66897900  | 0.09440800  | 1.24197900  |
| C | 3.47368700  | -2.06353300 | 2.80723900  |
| C | 3.50217600  | 0.29469400  | 2.35207800  |
| H | 3.07235400  | 0.84316000  | 0.18127000  |
| C | 3.90459100  | -0.78395600 | 3.13264300  |
| H | 3.78712400  | -2.89663400 | 3.43048100  |
| H | 3.83275500  | 1.30175200  | 2.59163000  |
| H | 4.54724300  | -0.63266500 | 3.99467200  |
| C | 2.09992800  | -1.31327000 | -1.54424500 |
| H | 2.17705800  | -0.26079700 | -1.83931400 |
| H | 1.46565200  | -1.83790200 | -2.25909900 |
| C | 2.19961400  | -3.74465100 | 1.40353300  |
| H | 1.73364900  | -3.74556300 | 0.41472100  |
| C | 3.37522000  | -4.72738200 | 1.34063700  |
| H | 3.00929500  | -5.71683800 | 1.04752700  |
| H | 4.10514800  | -4.40366400 | 0.59553900  |
| H | 3.87092500  | -4.83597800 | 2.31283400  |
| C | 1.16171300  | -4.19726200 | 2.44160100  |
| H | 1.60759300  | -4.25451900 | 3.44199200  |
| H | 0.31286100  | -3.50793800 | 2.49402000  |
| H | 0.77888700  | -5.19133900 | 2.18785100  |
| C | -0.62065600 | -1.12607800 | 1.09436300  |
| C | -1.68740300 | -1.93779400 | 1.46294300  |
| C | -2.45081700 | -1.59433600 | 2.57083300  |

|    |             |             |             |
|----|-------------|-------------|-------------|
| H  | -1.93751800 | -2.80178300 | 0.85695000  |
| C  | -1.07313900 | 0.33749100  | 2.83123700  |
| C  | -2.13631000 | -0.43600500 | 3.26881500  |
| H  | -3.29591800 | -2.20801700 | 2.85952500  |
| H  | -0.81984200 | 1.27456200  | 3.31359000  |
| H  | -2.71746000 | -0.11245900 | 4.12428400  |
| N  | -0.32119300 | -0.00114200 | 1.77175700  |
| C  | 2.97377600  | 2.70113800  | -0.59680100 |
| C  | 1.47587800  | 4.22737600  | 0.27657000  |
| C  | 1.84449300  | 4.71751600  | -1.14028100 |
| C  | 3.12942100  | 3.92677700  | -1.46753500 |
| H  | 1.87694800  | 4.90068300  | 1.04646400  |
| H  | 1.04388600  | 4.44666800  | -1.83507900 |
| H  | 1.97556000  | 5.79915700  | -1.18750700 |
| H  | 3.23224200  | 3.64747800  | -2.51793900 |
| H  | 4.03991400  | 4.46261400  | -1.17459900 |
| N  | 2.12453100  | 2.92471900  | 0.37495000  |
| O  | 3.54989900  | 1.57794100  | -0.76793300 |
| C  | -0.02068100 | 4.05952800  | 0.56798500  |
| O  | -0.81027700 | 4.93941800  | 0.24384800  |
| O  | -0.35645300 | 2.96850100  | 1.18842600  |
| Pd | 1.05551000  | 1.46949500  | 1.15285400  |
| C  | 3.46410500  | -1.99148100 | -1.51956000 |
| O  | 3.57374000  | -3.20619200 | -1.42018200 |
| N  | 4.52745100  | -1.16444800 | -1.61599900 |
| H  | 4.42992700  | -0.15309900 | -1.63166200 |
| C  | 5.85800200  | -1.71039000 | -1.55965400 |
| H  | 6.05262500  | -2.18926300 | -0.59136100 |
| H  | 5.99019300  | -2.48918100 | -2.31888000 |
| C  | 6.87102600  | -0.61037800 | -1.78157300 |
| O  | 6.59722700  | 0.55195800  | -1.96326300 |
| O  | 8.11227000  | -1.09933000 | -1.74435900 |
| C  | 9.15496700  | -0.14235400 | -1.94529200 |
| H  | 9.12288000  | 0.62540700  | -1.16869400 |
| H  | 10.08520100 | -0.70595100 | -1.88872300 |
| H  | 9.05232600  | 0.33326100  | -2.92347400 |
| O  | -2.98824500 | -3.00968300 | -1.31362700 |
| H  | -2.14896400 | -2.52291700 | -1.43005400 |
| C  | -3.99178700 | -2.07857800 | -1.07369500 |
| H  | -3.65453900 | -1.22734600 | -0.47316900 |
| C  | -5.07977600 | -2.78358600 | -0.26756900 |
| F  | -4.57212600 | -3.18954600 | 0.91611200  |
| F  | -6.10001000 | -1.96038800 | -0.00351800 |
| F  | -5.55846900 | -3.86296300 | -0.88311500 |

|   |             |             |             |
|---|-------------|-------------|-------------|
| C | -4.51535600 | -1.49358700 | -2.39192100 |
| F | -5.37892800 | -0.49542400 | -2.16886200 |
| F | -3.48264100 | -1.00404800 | -3.09034600 |
| F | -5.12571600 | -2.40856000 | -3.15120200 |
| O | -3.35067200 | 3.89080100  | -0.10074200 |
| H | -2.50696700 | 4.36607400  | 0.07200500  |
| C | -3.12935900 | 2.54648500  | 0.14464600  |
| H | -2.36686800 | 2.38112000  | 0.91283900  |
| C | -2.60871000 | 1.85021500  | -1.11728900 |
| F | -1.52687100 | 2.49320400  | -1.58357100 |
| F | -2.21905900 | 0.58343200  | -0.84431400 |
| F | -3.50512500 | 1.79559200  | -2.09984500 |
| C | -4.42563900 | 1.93492800  | 0.66705300  |
| F | -4.26745400 | 0.60842900  | 0.90100100  |
| F | -4.75175100 | 2.49703600  | 1.83638900  |
| F | -5.45221400 | 2.07739900  | -0.16565500 |

### S-TS3-iso8

|   |             |             |             |
|---|-------------|-------------|-------------|
| C | -0.35917400 | -1.26981700 | -0.17472200 |
| O | 0.20616800  | -1.80098100 | 0.77649700  |
| N | -1.69162000 | -1.03240800 | -0.17960700 |
| C | -2.41071400 | -0.55475200 | -1.32756500 |
| C | -2.91856900 | -1.45966300 | -2.26105900 |
| C | -2.59658900 | 0.83754300  | -1.43239000 |
| C | -3.62904800 | -0.91028100 | -3.34059300 |
| C | -3.32721200 | 1.32822100  | -2.52472000 |
| H | -2.98500300 | 1.46816300  | -0.27932000 |
| C | -3.84393300 | 0.45486200  | -3.47598100 |
| H | -4.02939600 | -1.58201500 | -4.09476600 |
| H | -3.48959500 | 2.39872700  | -2.61701700 |
| H | -4.40783200 | 0.83233500  | -4.32351000 |
| C | -2.39742000 | -1.11116300 | 1.10543000  |
| H | -2.31941900 | -0.14086000 | 1.61015200  |
| H | -1.89929600 | -1.86631100 | 1.71308900  |
| C | -2.69719200 | -2.95986200 | -2.17733500 |
| H | -2.30412200 | -3.18228000 | -1.18182300 |
| C | -4.00398900 | -3.74853000 | -2.32531100 |
| H | -3.80715200 | -4.81479500 | -2.17464500 |
| H | -4.73187800 | -3.43326700 | -1.57458800 |
| H | -4.44242900 | -3.63385200 | -3.32388500 |
| C | -1.66601600 | -3.40551800 | -3.22505400 |
| H | -2.03881800 | -3.22973800 | -4.24138200 |
| H | -0.71897300 | -2.86657100 | -3.11874300 |

|    |             |             |             |
|----|-------------|-------------|-------------|
| H  | -1.46234100 | -4.47647300 | -3.12244200 |
| C  | 0.47241500  | -0.84457700 | -1.36612000 |
| C  | 1.43857300  | -1.72798800 | -1.83410800 |
| C  | 2.30248500  | -1.31762800 | -2.84109200 |
| H  | 1.53647200  | -2.70661700 | -1.37732100 |
| C  | 1.21951400  | 0.80885800  | -2.80635400 |
| C  | 2.18893300  | -0.02607400 | -3.33801600 |
| H  | 3.06980600  | -1.99039900 | -3.20508100 |
| H  | 1.12345100  | 1.84022600  | -3.12568800 |
| H  | 2.85669400  | 0.34814800  | -4.10498200 |
| N  | 0.36936500  | 0.40910200  | -1.84707300 |
| C  | -2.68899600 | 3.14630600  | 0.79725100  |
| C  | -0.93545600 | 4.54888600  | 0.26814800  |
| C  | -1.33554900 | 4.86141700  | 1.72567100  |
| C  | -2.73750500 | 4.22641900  | 1.85387300  |
| H  | -1.19095100 | 5.38125100  | -0.40169700 |
| H  | -0.63176700 | 4.37243800  | 2.40577000  |
| H  | -1.32096900 | 5.93018200  | 1.94197800  |
| H  | -2.94826600 | 3.79958400  | 2.83667100  |
| H  | -3.54151000 | 4.93233200  | 1.61442800  |
| N  | -1.74394800 | 3.38349900  | -0.07264700 |
| O  | -3.43579400 | 2.11035200  | 0.74039300  |
| C  | 0.54236700  | 4.21720500  | 0.02232500  |
| O  | 1.41593000  | 4.91057300  | 0.53068300  |
| O  | 0.77015900  | 3.20637000  | -0.76050500 |
| Pd | -0.83109500 | 1.93380800  | -1.03905600 |
| C  | -3.85110000 | -1.52822800 | 0.91303400  |
| O  | -4.16195200 | -2.68425900 | 0.66920800  |
| N  | -4.75539900 | -0.52600000 | 1.01210700  |
| H  | -4.45303100 | 0.41331500  | 1.23574100  |
| C  | -6.15677900 | -0.80101800 | 0.84259600  |
| H  | -6.68783100 | 0.14501300  | 0.70629100  |
| H  | -6.31916000 | -1.40527300 | -0.05401700 |
| C  | -6.82485600 | -1.54599600 | 1.99267000  |
| O  | -7.92197600 | -2.03832000 | 1.89494600  |
| O  | -6.08427000 | -1.55604400 | 3.10256200  |
| C  | -6.65255900 | -2.26376300 | 4.20511500  |
| H  | -6.82851900 | -3.30794400 | 3.93683700  |
| H  | -5.91853200 | -2.19392700 | 5.00703100  |
| H  | -7.59825200 | -1.80692500 | 4.50682700  |
| O  | 2.41884300  | -3.42457600 | 0.75463000  |
| H  | 1.63759200  | -2.86358000 | 0.92571600  |
| C  | 3.53954200  | -2.60205600 | 0.76713400  |
| H  | 3.35036100  | -1.61236000 | 0.33891200  |



|   |            |             |             |
|---|------------|-------------|-------------|
| C | 4.59886200 | -3.26453800 | -0.10972100 |
| F | 4.14977400 | -3.33881900 | -1.38077400 |
| F | 5.73127800 | -2.55375100 | -0.12649900 |
| F | 4.88588500 | -4.50483300 | 0.28074900  |
| C | 4.02056100 | -2.36432000 | 2.20446600  |
| F | 5.00036800 | -1.45347700 | 2.24290600  |
| F | 2.99545300 | -1.90453500 | 2.93429500  |
| F | 4.46892700 | -3.48119900 | 2.78566600  |
| O | 3.76453000 | 3.46722900  | 0.84139300  |
| H | 3.01567400 | 4.08889500  | 0.70284700  |
| C | 3.37121700 | 2.23164900  | 0.35552300  |
| H | 2.65057300 | 2.31510900  | -0.46445100 |
| C | 2.66388300 | 1.42840000  | 1.45232800  |
| F | 1.64486200 | 2.14212500  | 1.95769500  |
| F | 2.12906300 | 0.29085400  | 0.95152400  |
| F | 3.46290100 | 1.09014600  | 2.46125100  |
| C | 4.59801600 | 1.51945600  | -0.20547900 |
| F | 4.25663700 | 0.30260800  | -0.69816800 |
| F | 5.10188300 | 2.22182500  | -1.22565600 |
| F | 5.56193000 | 1.33455300  | 0.69168600  |

### S-TS4-iso1

|   |             |             |             |
|---|-------------|-------------|-------------|
| C | 0.37670600  | 0.69834100  | 0.15071800  |
| O | 0.69355200  | 1.49850900  | -0.72314400 |
| N | -0.72767300 | -0.08232000 | 0.04969900  |
| C | -1.22500500 | -0.88492700 | 1.13441100  |
| C | -2.05432400 | -0.31618900 | 2.09882200  |
| C | -0.84196300 | -2.24012800 | 1.15748200  |
| C | -2.47595900 | -1.16056600 | 3.13840400  |
| C | -1.31321900 | -3.04160900 | 2.20767800  |
| H | -0.97157500 | -2.91487100 | -0.03936300 |
| C | -2.12427000 | -2.50089700 | 3.19920400  |
| H | -3.11638600 | -0.74973400 | 3.91400200  |
| H | -1.04028300 | -4.09313300 | 2.23552500  |
| H | -2.48800200 | -3.12012000 | 4.01313900  |
| C | -1.29437900 | -0.26909300 | -1.28464000 |
| H | -0.81546700 | -1.13146300 | -1.76231100 |
| H | -1.06929600 | 0.62465800  | -1.86879200 |
| C | -2.49188600 | 1.13653800  | 2.07462000  |
| H | -2.20427000 | 1.55273900  | 1.10530400  |
| C | -4.01537200 | 1.26442800  | 2.18612700  |
| H | -4.33092800 | 2.28565900  | 1.95920800  |
| H | -4.50523500 | 0.59545300  | 1.47466500  |

|    |             |             |             |
|----|-------------|-------------|-------------|
| H  | -4.37228300 | 1.01884900  | 3.19358900  |
| C  | -1.78904600 | 1.94027300  | 3.17729600  |
| H  | -2.06532500 | 1.56758700  | 4.17090000  |
| H  | -0.69956300 | 1.87823400  | 3.08931800  |
| H  | -2.07722800 | 2.99509000  | 3.12088800  |
| C  | 1.27642800  | 0.54241100  | 1.35718400  |
| C  | 1.79140900  | 1.69244100  | 1.94320500  |
| C  | 2.73286100  | 1.57356900  | 2.95763400  |
| H  | 1.48982200  | 2.66521200  | 1.57033600  |
| C  | 2.60544000  | -0.79604800 | 2.69975600  |
| C  | 3.14623300  | 0.30565000  | 3.34356100  |
| H  | 3.15722600  | 2.46136800  | 3.41089000  |
| H  | 2.93032900  | -1.80340300 | 2.93353400  |
| H  | 3.89692700  | 0.16215600  | 4.11172300  |
| N  | 1.68175900  | -0.68653600 | 1.73208100  |
| C  | 0.00303700  | -4.22301200 | -1.21601900 |
| C  | 2.18315100  | -4.80729900 | -0.74811600 |
| C  | 1.93978100  | -5.14026300 | -2.23455000 |
| C  | 0.39996000  | -5.14043400 | -2.34983200 |
| H  | 2.29216000  | -5.72203500 | -0.14959900 |
| H  | 2.36854500  | -4.34876200 | -2.85648200 |
| H  | 2.39855400  | -6.08380100 | -2.53172800 |
| H  | 0.02079500  | -4.76817300 | -3.30413700 |
| H  | -0.03449200 | -6.13301400 | -2.18138400 |
| N  | 0.96795000  | -4.10591400 | -0.34660100 |
| O  | -1.11293600 | -3.60402700 | -1.10053100 |
| C  | 3.39691500  | -3.92236400 | -0.43216500 |
| O  | 4.47441600  | -4.15301700 | -0.96980800 |
| O  | 3.19559300  | -2.98022800 | 0.43661400  |
| Pd | 1.21125100  | -2.49690100 | 0.76051500  |
| C  | -2.80177900 | -0.44158900 | -1.23464600 |
| O  | -3.54688700 | 0.46917500  | -0.88262400 |
| N  | -3.26872200 | -1.64302400 | -1.62615700 |
| H  | -2.62313400 | -2.42255800 | -1.69989600 |
| C  | -4.68403600 | -1.90245200 | -1.53913700 |
| H  | -5.24180200 | -1.14481200 | -2.09279600 |
| H  | -4.89263700 | -2.87604000 | -1.99070300 |
| C  | -5.15443600 | -1.92633400 | -0.08773800 |
| O  | -4.47449000 | -2.25059500 | 0.85306900  |
| O  | -6.43366600 | -1.54672800 | -0.00798700 |
| C  | -6.99608700 | -1.49415200 | 1.30742900  |
| H  | -6.38987700 | -0.85199700 | 1.95067400  |
| H  | -7.98996100 | -1.07014900 | 1.17737900  |
| H  | -7.04983300 | -2.49614100 | 1.73896600  |

|   |             |             |             |
|---|-------------|-------------|-------------|
| O | 2.07209500  | 3.86541800  | -0.44773700 |
| H | 1.61159300  | 3.04672900  | -0.71403000 |
| C | 3.43560600  | 3.59714200  | -0.40479500 |
| H | 3.66410400  | 2.58574600  | -0.05348200 |
| C | 4.05518400  | 4.56422900  | 0.60092100  |
| F | 3.51833000  | 4.35022800  | 1.82145800  |
| F | 5.37482800  | 4.37446800  | 0.70619000  |
| F | 3.83625900  | 5.84032400  | 0.29124700  |
| C | 4.05257400  | 3.71566800  | -1.80422500 |
| F | 5.33386900  | 3.32911000  | -1.80321500 |
| F | 3.37678200  | 2.91811000  | -2.64254700 |
| F | 3.99331800  | 4.96002500  | -2.28647300 |
| O | 6.04781700  | -1.87072700 | -1.01041000 |
| H | 5.60006600  | -2.74572300 | -0.97088000 |
| C | 5.20343700  | -0.94248600 | -0.42642800 |
| H | 4.57198600  | -1.38174100 | 0.35261000  |
| C | 4.23930500  | -0.36603700 | -1.46849700 |
| F | 3.56988500  | -1.35910300 | -2.07567500 |
| F | 3.31037400  | 0.42520800  | -0.88307200 |
| F | 4.84579800  | 0.35112300  | -2.41102900 |
| C | 6.05451200  | 0.13038400  | 0.24650400  |
| F | 5.26537900  | 1.06700200  | 0.82981500  |
| F | 6.78787300  | -0.41816900 | 1.22077100  |
| F | 6.87400600  | 0.75916000  | -0.59085500 |
| O | -5.26681700 | 2.58830800  | -0.62964500 |
| H | -4.46396200 | 2.05337600  | -0.75452500 |
| C | -6.33892800 | 1.70905800  | -0.67747500 |
| H | -6.07498100 | 0.69940000  | -0.34903400 |
| C | -6.85257400 | 1.55957800  | -2.11483700 |
| F | -5.82734100 | 1.19913200  | -2.90860100 |
| F | -7.78189200 | 0.59614200  | -2.20622200 |
| F | -7.37102700 | 2.68680900  | -2.60242100 |
| C | -7.40969200 | 2.21261500  | 0.28834300  |
| F | -8.52354300 | 1.46222200  | 0.20593500  |
| F | -6.96348100 | 2.11813700  | 1.55127700  |
| F | -7.74644600 | 3.48008100  | 0.06453500  |

### S-TS4-iso2

|   |             |             |             |
|---|-------------|-------------|-------------|
| C | 0.30483900  | 0.66818600  | 0.18332600  |
| O | 0.58625500  | 1.49548700  | -0.67589000 |
| N | -0.77114400 | -0.15259700 | 0.07124700  |
| C | -1.23426300 | -0.98396000 | 1.14752900  |
| C | -2.06146700 | -0.44919800 | 2.13603600  |

|   |             |             |             |
|---|-------------|-------------|-------------|
| C | -0.81236100 | -2.32708600 | 1.14690300  |
| C | -2.40262900 | -1.30671400 | 3.19398300  |
| C | -1.21508300 | -3.14829000 | 2.21093500  |
| H | -0.92619700 | -2.98214700 | -0.05801300 |
| C | -1.99091600 | -2.63241600 | 3.24351300  |
| H | -3.02097200 | -0.91754200 | 3.99850900  |
| H | -0.90622900 | -4.19016000 | 2.22370600  |
| H | -2.28206300 | -3.25858200 | 4.08192600  |
| C | -1.32009300 | -0.35745800 | -1.26561300 |
| H | -0.82386200 | -1.21392300 | -1.73547400 |
| H | -1.10283500 | 0.53695300  | -1.85245300 |
| C | -2.57780200 | 0.97798100  | 2.12187000  |
| H | -2.33275400 | 1.40967000  | 1.14828600  |
| C | -4.10518100 | 1.01781600  | 2.26243400  |
| H | -4.47896900 | 2.02503600  | 2.06492800  |
| H | -4.58070900 | 0.34663200  | 1.54141600  |
| H | -4.42816300 | 0.73113000  | 3.27066200  |
| C | -1.90232800 | 1.82105600  | 3.21204900  |
| H | -2.12819300 | 1.42884300  | 4.21087600  |
| H | -0.81351800 | 1.83372200  | 3.09696200  |
| H | -2.26310600 | 2.85356900  | 3.16693100  |
| C | 1.22118600  | 0.51747200  | 1.37757900  |
| C | 1.70388000  | 1.67136200  | 1.98285300  |
| C | 2.66329600  | 1.56283000  | 2.98158400  |
| H | 1.36366600  | 2.64086600  | 1.63535100  |
| C | 2.61613900  | -0.80354600 | 2.66944200  |
| C | 3.12695900  | 0.30185500  | 3.33129700  |
| H | 3.06345800  | 2.45455100  | 3.44892900  |
| H | 2.98207000  | -1.80319500 | 2.87393400  |
| H | 3.89376400  | 0.16759400  | 4.08506800  |
| N | 1.67443400  | -0.70514800 | 1.71801700  |
| C | 0.06897600  | -4.24118600 | -1.27338200 |
| C | 2.27258800  | -4.76601900 | -0.84070800 |
| C | 2.02170600  | -5.07961800 | -2.33010400 |
| C | 0.48124000  | -5.12726700 | -2.42678000 |
| H | 2.41743100  | -5.68781500 | -0.26098400 |
| H | 2.41698700  | -4.26370900 | -2.94261500 |
| H | 2.50613800  | -6.00256300 | -2.65022600 |
| H | 0.07861400  | -4.75213800 | -3.37021700 |
| H | 0.08071400  | -6.13576400 | -2.26935100 |
| N | 1.04136900  | -4.11003900 | -0.41272900 |
| O | -1.06293500 | -3.65838900 | -1.13534800 |
| C | 3.46106600  | -3.84965000 | -0.52086600 |
| O | 4.54167000  | -4.03754800 | -1.06679300 |

|    |             |             |             |
|----|-------------|-------------|-------------|
| O  | 3.23686600  | -2.92640400 | 0.36481900  |
| Pd | 1.24846500  | -2.51233000 | 0.71566800  |
| C  | -2.82380200 | -0.54699500 | -1.23213800 |
| O  | -3.57908500 | 0.33096800  | -0.82557100 |
| N  | -3.28200600 | -1.72028600 | -1.70710000 |
| H  | -2.63997000 | -2.49921200 | -1.80878200 |
| C  | -4.70824500 | -1.94847700 | -1.73170700 |
| H  | -5.20665000 | -1.14297300 | -2.27317200 |
| H  | -4.90002200 | -2.89130100 | -2.25109000 |
| C  | -5.34947500 | -2.02288300 | -0.35232800 |
| O  | -6.44325900 | -1.57634300 | -0.10074400 |
| O  | -4.58948200 | -2.68407100 | 0.52356100  |
| C  | -5.17325100 | -2.85148100 | 1.81853200  |
| H  | -6.15684600 | -3.31851200 | 1.73349800  |
| H  | -4.48373800 | -3.48859500 | 2.36879400  |
| H  | -5.27495800 | -1.88320100 | 2.31473700  |
| O  | 1.89623900  | 3.90401200  | -0.36799700 |
| H  | 1.45008400  | 3.08389900  | -0.65164000 |
| C  | 3.26503700  | 3.66079300  | -0.34554500 |
| H  | 3.51579800  | 2.64745600  | -0.01519400 |
| C  | 3.87877500  | 4.62109900  | 0.67028300  |
| F  | 3.35342500  | 4.38156400  | 1.89109400  |
| F  | 5.20136700  | 4.44666600  | 0.76342000  |
| F  | 3.64124800  | 5.89843900  | 0.38108500  |
| C  | 3.86373400  | 3.81573300  | -1.74940800 |
| F  | 5.15449300  | 3.46271800  | -1.76767100 |
| F  | 3.19940100  | 3.01302000  | -2.59232000 |
| F  | 3.76649700  | 5.06473800  | -2.21198800 |
| O  | 6.05173100  | -1.70353200 | -1.07964700 |
| H  | 5.63339300  | -2.59280000 | -1.05701100 |
| C  | 5.17948000  | -0.81743400 | -0.47132100 |
| H  | 4.57010500  | -1.29459200 | 0.30276900  |
| C  | 4.18758500  | -0.25529100 | -1.49503200 |
| F  | 3.55430000  | -1.26015200 | -2.12176200 |
| F  | 3.23111900  | 0.48426400  | -0.88643400 |
| F  | 4.75952000  | 0.50669200  | -2.42322400 |
| C  | 5.99636300  | 0.27131500  | 0.21821700  |
| F  | 5.17766800  | 1.16843000  | 0.82225100  |
| F  | 6.75236400  | -0.27019500 | 1.17910300  |
| F  | 6.78973600  | 0.94327200  | -0.61015400 |
| O  | -5.19619000 | 2.50647900  | -0.48227500 |
| H  | -4.45429400 | 1.89659300  | -0.63323400 |
| C  | -6.36366500 | 1.76091400  | -0.59958000 |
| H  | -6.25342500 | 0.72303400  | -0.26370800 |

|   |             |            |             |
|---|-------------|------------|-------------|
| C | -6.80251000 | 1.69082200 | -2.06699000 |
| F | -5.78548600 | 1.19357600 | -2.80223700 |
| F | -7.85042500 | 0.87569900 | -2.23680500 |
| F | -7.11541700 | 2.88484000 | -2.57238000 |
| C | -7.41236500 | 2.40440200 | 0.30544600  |
| F | -8.60442400 | 1.80839700 | 0.16443400  |
| F | -7.04304900 | 2.27267400 | 1.58961700  |
| F | -7.56696900 | 3.70597700 | 0.05756500  |

### S-TS4-iso3

|   |             |             |             |
|---|-------------|-------------|-------------|
| C | -0.54792000 | -0.87536500 | 0.02168000  |
| O | -0.97757200 | -1.55223800 | -0.90811500 |
| N | 0.64864500  | -0.24142100 | -0.04615200 |
| C | 1.24817100  | 0.45673400  | 1.06042600  |
| C | 2.05885300  | -0.23326100 | 1.96056500  |
| C | 0.99156300  | 1.83906900  | 1.16345900  |
| C | 2.60920300  | 0.51973900  | 3.00977400  |
| C | 1.58467400  | 2.54141800  | 2.22348300  |
| H | 1.13331200  | 2.57227500  | -0.00481100 |
| C | 2.39067900  | 1.88274200  | 3.14447700  |
| H | 3.24406600  | 0.01662200  | 3.73283000  |
| H | 1.41106400  | 3.61036900  | 2.31363700  |
| H | 2.85292300  | 2.42597400  | 3.96262900  |
| C | 1.20441300  | -0.04765600 | -1.38638000 |
| H | 0.74548700  | 0.84061000  | -1.83621400 |
| H | 0.93390200  | -0.91631800 | -1.98864200 |
| C | 2.32440500  | -1.72566000 | 1.86783900  |
| H | 2.08207700  | -2.03776500 | 0.84801400  |
| C | 3.79609300  | -2.07320100 | 2.11564700  |
| H | 3.97744000  | -3.12031300 | 1.85281000  |
| H | 4.46677400  | -1.45023900 | 1.52236100  |
| H | 4.06856700  | -1.95732900 | 3.17142900  |
| C | 1.42688100  | -2.49848100 | 2.84562300  |
| H | 1.65218000  | -2.21917300 | 3.88202400  |
| H | 0.36496800  | -2.30257000 | 2.67310500  |
| H | 1.59485300  | -3.57582600 | 2.74290400  |
| C | -1.41167000 | -0.71730500 | 1.25400300  |
| C | -2.06068300 | -1.84537700 | 1.74327800  |
| C | -2.97226500 | -1.70781700 | 2.78125100  |
| H | -1.88116000 | -2.80936400 | 1.28006900  |
| C | -2.55357500 | 0.64146200  | 2.74094600  |
| C | -3.21975100 | -0.44050900 | 3.29279200  |
| H | -3.49959100 | -2.57583800 | 3.15862400  |

|    |             |             |             |
|----|-------------|-------------|-------------|
| H  | -2.74902400 | 1.65487400  | 3.07179400  |
| H  | -3.94011000 | -0.27857700 | 4.08591000  |
| N  | -1.66192300 | 0.51032600  | 1.74524200  |
| C  | 0.24113000  | 4.05459100  | -1.03541200 |
| C  | -1.83920400 | 4.82251400  | -0.41062300 |
| C  | -1.63104000 | 5.24142600  | -1.88106000 |
| C  | -0.10754900 | 5.08830900  | -2.08126300 |
| H  | -1.82742000 | 5.69502900  | 0.25681000  |
| H  | -2.17414600 | 4.55079100  | -2.53300600 |
| H  | -1.99722400 | 6.24844800  | -2.08340600 |
| H  | 0.18198800  | 4.74995600  | -3.07857900 |
| H  | 0.43840700  | 6.01554500  | -1.87042900 |
| N  | -0.68621600 | 3.97541800  | -0.12316600 |
| O  | 1.28786000  | 3.31571800  | -1.02320700 |
| C  | -3.12178800 | 4.04041800  | -0.09658000 |
| O  | -4.19268200 | 4.42050100  | -0.55802800 |
| O  | -2.98076300 | 3.01717700  | 0.68711400  |
| Pd | -1.04021700 | 2.32136900  | 0.88300200  |
| C  | 2.72134400  | 0.06697200  | -1.38511700 |
| O  | 3.42402500  | -0.90600200 | -1.10436500 |
| N  | 3.19383000  | 1.26062500  | -1.78626700 |
| H  | 2.54916300  | 2.04417000  | -1.80448300 |
| C  | 4.60186100  | 1.55818300  | -1.81643900 |
| H  | 5.15292500  | 0.72979000  | -2.26658600 |
| H  | 4.77078100  | 2.43907600  | -2.44050000 |
| C  | 5.17431500  | 1.80257600  | -0.42506300 |
| O  | 4.54140400  | 1.73989100  | 0.59964800  |
| O  | 6.47217900  | 2.07920600  | -0.51948600 |
| C  | 7.19345200  | 2.08001900  | 0.71416100  |
| H  | 7.14025900  | 1.08620000  | 1.16198000  |
| H  | 8.22176800  | 2.32507400  | 0.45173500  |
| H  | 6.78270800  | 2.82324600  | 1.40148900  |
| O  | -2.59547800 | -3.77419600 | -0.81156700 |
| H  | -2.06964200 | -2.97525200 | -1.00982700 |
| C  | -3.92691000 | -3.39680200 | -0.68151600 |
| H  | -4.05240300 | -2.41383200 | -0.21604000 |
| C  | -4.59308900 | -4.40960100 | 0.24622300  |
| F  | -4.02064000 | -4.34444900 | 1.46798600  |
| F  | -5.89490700 | -4.14517500 | 0.40060000  |
| F  | -4.46527700 | -5.66295000 | -0.18323400 |
| C  | -4.60339400 | -3.30750000 | -2.05549800 |
| F  | -5.83016400 | -2.78186600 | -1.95650500 |
| F  | -3.87157000 | -2.51286700 | -2.84776500 |
| F  | -4.70840300 | -4.49803500 | -2.65393300 |

|   |             |             |             |
|---|-------------|-------------|-------------|
| O | -6.00057900 | 2.33139800  | -0.64741600 |
| H | -5.44822300 | 3.14314600  | -0.57766700 |
| C | -5.24189500 | 1.26536200  | -0.19723700 |
| H | -4.52682500 | 1.55638800  | 0.57927300  |
| C | -4.40345600 | 0.68292600  | -1.34058200 |
| F | -3.67497700 | 1.65178100  | -1.91653100 |
| F | -3.52656000 | -0.23810500 | -0.87681800 |
| F | -5.13361300 | 0.10334700  | -2.29069100 |
| C | -6.18341200 | 0.23840400  | 0.42506000  |
| F | -5.49215500 | -0.84879200 | 0.84913100  |
| F | -6.77686100 | 0.76314900  | 1.50307700  |
| F | -7.12895000 | -0.18541200 | -0.40770700 |
| O | 5.94670900  | -0.85688600 | -0.18640200 |
| H | 5.03655000  | -0.92345800 | -0.55790800 |
| C | 6.74389800  | -1.88586500 | -0.65852800 |
| H | 6.17049200  | -2.75565300 | -1.00212700 |
| C | 7.61672000  | -2.35963800 | 0.50732300  |
| F | 6.84563100  | -2.90191900 | 1.45720300  |
| F | 8.49620700  | -3.28920000 | 0.11313800  |
| F | 8.29885700  | -1.35047000 | 1.05893600  |
| C | 7.56695600  | -1.39164500 | -1.85477400 |
| F | 8.30738700  | -2.36793500 | -2.39077300 |
| F | 6.72591700  | -0.95337600 | -2.81147800 |
| F | 8.37450500  | -0.38143200 | -1.52818300 |

#### S-TS4-iso4

|   |             |             |             |
|---|-------------|-------------|-------------|
| C | -1.25495500 | 2.10735900  | 1.06251800  |
| O | -2.18148600 | 1.81995300  | 1.81664700  |
| N | 0.04924400  | 1.88620000  | 1.34540900  |
| C | 1.09637300  | 2.21171900  | 0.40876800  |
| C | 1.75210000  | 3.44008400  | 0.48447700  |
| C | 1.40218300  | 1.24220400  | -0.56969200 |
| C | 2.73112700  | 3.69016000  | -0.49164500 |
| C | 2.39738200  | 1.54410600  | -1.50920300 |
| H | 1.55272600  | -0.02348700 | -0.05181800 |
| C | 3.05757100  | 2.76766600  | -1.47360600 |
| H | 3.24917900  | 4.64514500  | -0.47286000 |
| H | 2.65847200  | 0.81224600  | -2.26461400 |
| H | 3.82450000  | 2.99840000  | -2.20662700 |
| C | 0.34612900  | 1.01732900  | 2.49102900  |
| H | 0.16577900  | -0.02527400 | 2.21549000  |
| H | -0.33741600 | 1.27408100  | 3.30098900  |
| C | 1.42144200  | 4.51185800  | 1.50811700  |



|    |             |             |             |
|----|-------------|-------------|-------------|
| H  | 0.75680200  | 4.06742000  | 2.25352900  |
| C  | 2.67024300  | 5.00104600  | 2.25229400  |
| H  | 2.37710800  | 5.70249700  | 3.04032700  |
| H  | 3.19059500  | 4.16346300  | 2.72063000  |
| H  | 3.36136700  | 5.52878800  | 1.58408500  |
| C  | 0.69531800  | 5.68590000  | 0.83449400  |
| H  | 1.34795200  | 6.18723900  | 0.10962000  |
| H  | -0.20096000 | 5.35484400  | 0.30082400  |
| H  | 0.39600600  | 6.42714900  | 1.58322200  |
| C  | -1.60976500 | 2.76573000  | -0.25153800 |
| C  | -2.37514100 | 3.92359000  | -0.23201900 |
| C  | -2.78253900 | 4.48254100  | -1.43609100 |
| H  | -2.64835700 | 4.35969600  | 0.72157300  |
| C  | -1.71678800 | 2.66516000  | -2.56130500 |
| C  | -2.44762300 | 3.84135200  | -2.62146400 |
| H  | -3.37125000 | 5.39375100  | -1.44595300 |
| H  | -1.47049500 | 2.10182100  | -3.45326700 |
| H  | -2.76795600 | 4.22353900  | -3.58331300 |
| N  | -1.29012700 | 2.14696600  | -1.40109500 |
| C  | 1.12464200  | -1.97577800 | -0.39490600 |
| C  | -0.31194300 | -2.53994800 | -2.10473400 |
| C  | -0.17081000 | -3.79448800 | -1.21321500 |
| C  | 1.03654500  | -3.47621000 | -0.30248400 |
| H  | 0.12683300  | -2.69784400 | -3.09846900 |
| H  | -1.07893200 | -3.92135900 | -0.62118200 |
| H  | -0.02807200 | -4.70150000 | -1.80145900 |
| H  | 0.90098900  | -3.78720400 | 0.73483800  |
| H  | 1.97449800  | -3.90631700 | -0.66670300 |
| N  | 0.45004400  | -1.51316600 | -1.40476400 |
| O  | 1.78315700  | -1.20494900 | 0.39593200  |
| C  | -1.73330200 | -1.99747300 | -2.32029900 |
| O  | -2.67517500 | -2.76966300 | -2.47094200 |
| O  | -1.84037800 | -0.70491900 | -2.35328500 |
| Pd | -0.28021200 | 0.31311100  | -1.45393800 |
| C  | 1.76404800  | 1.22483500  | 3.00702700  |
| O  | 2.09549800  | 2.24862000  | 3.58399400  |
| N  | 2.59434900  | 0.16544600  | 2.82191300  |
| H  | 2.31325500  | -0.56319000 | 2.17422000  |
| C  | 3.98688200  | 0.27696000  | 3.14460800  |
| H  | 4.10450000  | 1.01789200  | 3.93964700  |
| H  | 4.37972200  | -0.67661400 | 3.51068700  |
| C  | 4.82168000  | 0.70511200  | 1.95027400  |
| O  | 4.36595000  | 0.95777300  | 0.85296400  |
| O  | 6.10811300  | 0.75552600  | 2.26008000  |

|   |             |             |             |
|---|-------------|-------------|-------------|
| C | 7.00860200  | 1.10569800  | 1.20188700  |
| H | 6.73535200  | 2.07447300  | 0.77710200  |
| H | 7.99280300  | 1.15497100  | 1.66417900  |
| H | 6.98795400  | 0.34065700  | 0.42361800  |
| O | -2.33006500 | -0.40341000 | 3.43724600  |
| H | -2.44221900 | 0.38584300  | 2.87078700  |
| C | -2.93385900 | -1.50410600 | 2.84990400  |
| H | -3.93612900 | -1.30031100 | 2.45834900  |
| C | -3.08533900 | -2.56723700 | 3.93869700  |
| F | -3.87729200 | -2.10845300 | 4.90986600  |
| F | -3.63957000 | -3.68169000 | 3.44208400  |
| F | -1.90844200 | -2.89717800 | 4.48035000  |
| C | -2.09696500 | -1.99685400 | 1.66381100  |
| F | -2.61500200 | -3.06808600 | 1.06414600  |
| F | -2.01896200 | -1.01106600 | 0.74459400  |
| F | -0.83317700 | -2.29321200 | 2.01537200  |
| O | -5.04959800 | -1.37678900 | -2.31272000 |
| H | -4.24916200 | -1.92552300 | -2.47643900 |
| C | -4.70159100 | -0.39391700 | -1.40379500 |
| H | -3.62925000 | -0.38169200 | -1.18761500 |
| C | -5.41873700 | -0.63688000 | -0.07503500 |
| F | -5.11148700 | -1.86299500 | 0.38187400  |
| F | -5.02031200 | 0.24230900  | 0.86937400  |
| F | -6.74628500 | -0.55730900 | -0.16699200 |
| C | -5.02305300 | 0.97551400  | -2.00073900 |
| F | -4.67698700 | 1.96780100  | -1.15271800 |
| F | -4.32663200 | 1.16047300  | -3.13113100 |
| F | -6.31628000 | 1.13002400  | -2.29180900 |
| O | 5.24676300  | -0.15029000 | -1.50598700 |
| H | 4.98401400  | 0.45203800  | -0.78363500 |
| C | 4.51005100  | -1.31858400 | -1.34079700 |
| H | 3.57985000  | -1.15070800 | -0.78871200 |
| C | 5.30875000  | -2.34085500 | -0.52347800 |
| F | 5.54511900  | -1.83983900 | 0.70614100  |
| F | 4.62818100  | -3.48537400 | -0.36009700 |
| F | 6.48824000  | -2.62963200 | -1.06951000 |
| C | 4.12530900  | -1.85337200 | -2.72239500 |
| F | 3.31671700  | -2.92359300 | -2.61066900 |
| F | 3.45259700  | -0.92153200 | -3.41259800 |
| F | 5.18391300  | -2.21201300 | -3.44698300 |

### S-TS4-iso5

|   |             |             |             |
|---|-------------|-------------|-------------|
| C | -1.04264800 | -1.44927100 | -0.27423600 |
|---|-------------|-------------|-------------|

|   |             |             |             |
|---|-------------|-------------|-------------|
| O | -1.84036800 | -1.79312700 | -1.13972800 |
| N | 0.29048400  | -1.36363400 | -0.50353100 |
| C | 1.26133200  | -1.20502400 | 0.54481400  |
| C | 1.69785700  | -2.31223300 | 1.27090600  |
| C | 1.73541400  | 0.10009300  | 0.78478400  |
| C | 2.64621300  | -2.06511200 | 2.27665000  |
| C | 2.69925100  | 0.28363200  | 1.78850600  |
| H | 2.15910600  | 0.83013700  | -0.34061200 |
| C | 3.15849800  | -0.80113200 | 2.52852000  |
| H | 3.00526100  | -2.90258800 | 2.86822100  |
| H | 3.10371400  | 1.27612100  | 1.96653300  |
| H | 3.91438500  | -0.66209200 | 3.29405200  |
| C | 0.74500600  | -1.25744000 | -1.88671400 |
| H | 0.93423500  | -0.20274800 | -2.11933200 |
| H | -0.06313600 | -1.61842500 | -2.52466000 |
| C | 1.17554200  | -3.72138400 | 1.05493400  |
| H | 0.56996900  | -3.71955800 | 0.14496000  |
| C | 2.31288800  | -4.72506300 | 0.82641600  |
| H | 1.89307000  | -5.71305600 | 0.61133800  |
| H | 2.92438800  | -4.42274700 | -0.02611900 |
| H | 2.95374200  | -4.82294300 | 1.71094700  |
| C | 0.29343900  | -4.15039400 | 2.23685700  |
| H | 0.87801600  | -4.21361300 | 3.16270800  |
| H | -0.52419700 | -3.44272500 | 2.40868100  |
| H | -0.14316500 | -5.13673700 | 2.04819800  |
| C | -1.57121300 | -1.04404100 | 1.08421100  |
| C | -2.60006700 | -1.79508900 | 1.64025600  |
| C | -3.19792500 | -1.36169300 | 2.81679200  |
| H | -2.95331000 | -2.68241200 | 1.12618300  |
| C | -1.74179800 | 0.52905700  | 2.77461100  |
| C | -2.75796200 | -0.17910600 | 3.39612400  |
| H | -4.01432400 | -1.92608600 | 3.25130600  |
| H | -1.39524700 | 1.47873500  | 3.16566800  |
| H | -3.20703800 | 0.21254800  | 4.30114400  |
| N | -1.15201200 | 0.10683400  | 1.64532700  |
| C | 2.00992300  | 2.67199800  | -1.12428000 |
| C | 0.55844900  | 4.21717100  | -0.24023400 |
| C | 0.88320100  | 4.68151700  | -1.67426200 |
| C | 2.14963000  | 3.86889900  | -2.03121600 |
| H | 1.02102400  | 4.87699700  | 0.50618400  |
| H | 0.05643300  | 4.41140700  | -2.33787200 |
| H | 1.02918200  | 5.75983200  | -1.74189900 |
| H | 2.20942300  | 3.56502500  | -3.07859200 |
| H | 3.07615000  | 4.40184500  | -1.78467500 |

|    |             |             |             |
|----|-------------|-------------|-------------|
| N  | 1.18019400  | 2.89901200  | -0.15722600 |
| O  | 2.62102800  | 1.53609700  | -1.25977300 |
| C  | -0.92197700 | 4.08416000  | 0.14439800  |
| O  | -1.71967100 | 4.95104100  | -0.19410800 |
| O  | -1.21777400 | 3.04420500  | 0.86017800  |
| Pd | 0.17255400  | 1.50346800  | 0.79112300  |
| C  | 1.97611400  | -2.11462800 | -2.14222400 |
| O  | 1.95446100  | -3.32761000 | -2.01723900 |
| N  | 3.08002500  | -1.43404700 | -2.55820400 |
| H  | 3.12234500  | -0.43439600 | -2.40514900 |
| C  | 4.31906100  | -2.15620800 | -2.67265700 |
| H  | 4.15551100  | -3.08489200 | -3.22268700 |
| H  | 5.04905100  | -1.55629800 | -3.22074300 |
| C  | 4.89569200  | -2.48921700 | -1.30484300 |
| O  | 4.51704000  | -1.99523200 | -0.26621500 |
| O  | 5.88315900  | -3.37206300 | -1.39418000 |
| C  | 6.52899700  | -3.69256700 | -0.15714500 |
| H  | 5.81794700  | -4.16158300 | 0.52711100  |
| H  | 7.32722600  | -4.38608800 | -0.41665500 |
| H  | 6.93303200  | -2.78809000 | 0.30141200  |
| O  | -4.26598100 | -3.05227100 | -0.86202400 |
| H  | -3.43323500 | -2.61527700 | -1.12518700 |
| C  | -5.19929200 | -2.05569700 | -0.59965700 |
| H  | -4.76008300 | -1.17022100 | -0.12881500 |
| C  | -6.20731100 | -2.62787900 | 0.39328500  |
| F  | -5.57662400 | -2.94022200 | 1.54578600  |
| F  | -7.15975000 | -1.73690500 | 0.68739600  |
| F  | -6.79227600 | -3.73837500 | -0.05131600 |
| C  | -5.85074700 | -1.56881200 | -1.90011700 |
| F  | -6.65348700 | -0.52156500 | -1.67725900 |
| F  | -4.88785400 | -1.18283200 | -2.74825800 |
| F  | -6.56795200 | -2.52247800 | -2.50141900 |
| O  | -4.31219200 | 3.95511300  | -0.17360400 |
| H  | -3.44488700 | 4.41709200  | -0.13689600 |
| C  | -4.08958300 | 2.62712500  | 0.14779100  |
| H  | -3.25299000 | 2.49902200  | 0.84228400  |
| C  | -3.71774800 | 1.82851800  | -1.10592400 |
| F  | -2.67046500 | 2.40156700  | -1.72038900 |
| F  | -3.33639400 | 0.57070300  | -0.78416400 |
| F  | -4.70853800 | 1.73740100  | -1.98978100 |
| C  | -5.33185400 | 2.08552800  | 0.84832300  |
| F  | -5.16495300 | 0.77846000  | 1.16940800  |
| F  | -5.52652400 | 2.74317900  | 1.99660900  |
| F  | -6.43826700 | 2.18325100  | 0.11763800  |

|   |            |             |             |
|---|------------|-------------|-------------|
| O | 4.99561600 | 2.04120200  | 0.15441300  |
| H | 4.24128100 | 1.88398800  | -0.44076700 |
| C | 5.70733700 | 0.84631800  | 0.22739400  |
| H | 5.06107100 | -0.03452400 | 0.32666400  |
| C | 6.58078200 | 0.89543300  | 1.47666100  |
| F | 5.81255400 | 1.04676700  | 2.56506700  |
| F | 7.26385400 | -0.25251500 | 1.61556200  |
| F | 7.45797600 | 1.89853600  | 1.45402400  |
| C | 6.51404900 | 0.65350600  | -1.06041800 |
| F | 7.15677200 | -0.52446200 | -1.08971100 |
| F | 5.65163200 | 0.66157400  | -2.10315000 |
| F | 7.40628900 | 1.61603000  | -1.27279600 |

### S-TS4-iso6

|   |             |             |             |
|---|-------------|-------------|-------------|
| C | 1.19479400  | 1.70968600  | -0.31090400 |
| O | 2.01080000  | 1.84864600  | -1.21790900 |
| N | -0.12329900 | 1.96036400  | -0.49080700 |
| C | -1.08835300 | 1.89961000  | 0.57262200  |
| C | -1.37671600 | 3.04147400  | 1.32066600  |
| C | -1.71373300 | 0.65911500  | 0.79925600  |
| C | -2.32050300 | 2.89447400  | 2.34979300  |
| C | -2.65567600 | 0.57462500  | 1.83465900  |
| H | -2.14712900 | 0.02996000  | -0.36820300 |
| C | -2.95736400 | 1.68968000  | 2.60823200  |
| H | -2.55939100 | 3.75851300  | 2.96369800  |
| H | -3.15316100 | -0.36793000 | 2.03106500  |
| H | -3.68754300 | 1.61906500  | 3.40866600  |
| C | -0.58942400 | 2.06556600  | -1.87777700 |
| H | -0.71637800 | 1.05709700  | -2.28846600 |
| H | 0.18403300  | 2.57613600  | -2.45339800 |
| C | -0.68747200 | 4.37693800  | 1.10346600  |
| H | -0.17436000 | 4.33156900  | 0.13961200  |
| C | -1.68732400 | 5.53639600  | 1.02277700  |
| H | -1.16079400 | 6.45867100  | 0.75669100  |
| H | -2.43942000 | 5.34205200  | 0.25493300  |
| H | -2.18902600 | 5.71124600  | 1.98202300  |
| C | 0.35376100  | 4.62423900  | 2.20494600  |
| H | -0.12567200 | 4.69376900  | 3.18887400  |
| H | 1.09411300  | 3.81918100  | 2.25126900  |
| H | 0.88380800  | 5.56503800  | 2.02243800  |
| C | 1.69110500  | 1.22459500  | 1.03608100  |
| C | 2.84054000  | 1.81321900  | 1.55173300  |
| C | 3.40068500  | 1.30474100  | 2.71633600  |

|    |             |             |             |
|----|-------------|-------------|-------------|
| H  | 3.31123500  | 2.62964100  | 1.01522000  |
| C  | 1.67804500  | -0.34628900 | 2.73991100  |
| C  | 2.80683200  | 0.20606700  | 3.32281900  |
| H  | 4.30473600  | 1.74393300  | 3.12082000  |
| H  | 1.20663700  | -1.23306200 | 3.14784100  |
| H  | 3.22145000  | -0.24220800 | 4.21791900  |
| N  | 1.12259400  | 0.15492300  | 1.62488500  |
| C  | -2.30288700 | -1.79741000 | -1.20617100 |
| C  | -1.31118100 | -3.61049000 | -0.19239700 |
| C  | -1.61326000 | -4.02279700 | -1.65076700 |
| C  | -2.60055800 | -2.94047200 | -2.14240300 |
| H  | -1.94233300 | -4.15941300 | 0.51791000  |
| H  | -0.68753900 | -3.99222200 | -2.23248900 |
| H  | -2.01765000 | -5.03304900 | -1.71980500 |
| H  | -2.45239000 | -2.64015300 | -3.18208300 |
| H  | -3.64859000 | -3.23145100 | -2.02224800 |
| N  | -1.66066700 | -2.19560200 | -0.14837000 |
| O  | -2.62264000 | -0.56319700 | -1.38599300 |
| C  | 0.14437500  | -3.76663000 | 0.27145200  |
| O  | 0.76585000  | -4.78792800 | 0.00058200  |
| O  | 0.62409400  | -2.77915800 | 0.96447100  |
| Pd | -0.42357500 | -1.00181400 | 0.81147800  |
| C  | -1.87453800 | 2.87842100  | -1.98853900 |
| O  | -1.89735300 | 4.08049200  | -1.78087500 |
| N  | -2.96173300 | 2.16694000  | -2.39268400 |
| H  | -2.92432200 | 1.15487100  | -2.34234300 |
| C  | -4.25466100 | 2.78777200  | -2.42453200 |
| H  | -4.12787300 | 3.85563000  | -2.61963700 |
| H  | -4.86635000 | 2.36706000  | -3.22837400 |
| C  | -5.00891800 | 2.61526200  | -1.11762900 |
| O  | -4.56647000 | 2.03695400  | -0.14546700 |
| O  | -6.21236100 | 3.16254200  | -1.18449100 |
| C  | -7.04332300 | 3.02273500  | -0.02506000 |
| H  | -6.55512200 | 3.46709900  | 0.84540400  |
| H  | -7.96272200 | 3.55531500  | -0.26141400 |
| H  | -7.24943900 | 1.96745900  | 0.16328100  |
| O  | 4.63778500  | 2.61211900  | -1.03591800 |
| H  | 3.73400500  | 2.31333900  | -1.25585900 |
| C  | 5.39865600  | 1.48486900  | -0.74809300 |
| H  | 4.83355500  | 0.70599000  | -0.22598000 |
| C  | 6.51930100  | 1.92171800  | 0.19180500  |
| F  | 5.98712000  | 2.38786400  | 1.34162100  |
| F  | 7.31712200  | 0.89612500  | 0.50743000  |
| F  | 7.26917500  | 2.89594900  | -0.32039400 |

|   |             |             |             |
|---|-------------|-------------|-------------|
| C | 5.92115000  | 0.84233700  | -2.03933300 |
| F | 6.53941400  | -0.31776600 | -1.78759400 |
| F | 4.88370000  | 0.59423500  | -2.85021300 |
| F | 6.77383100  | 1.63387700  | -2.69659600 |
| O | 3.48925300  | -4.24152200 | -0.04192500 |
| H | 2.55759900  | -4.54793200 | 0.03222500  |
| C | 3.50567100  | -2.88189100 | 0.21813900  |
| H | 2.71101300  | -2.57886000 | 0.90730200  |
| C | 3.26549500  | -2.08781600 | -1.07035300 |
| F | 2.13342800  | -2.50434700 | -1.66014700 |
| F | 3.10171500  | -0.77090100 | -0.80526900 |
| F | 4.25202400  | -2.20222800 | -1.95635700 |
| C | 4.82979400  | -2.53579700 | 0.89163300  |
| F | 4.89939300  | -1.20578300 | 1.15013800  |
| F | 4.91523000  | -3.16231900 | 2.07029400  |
| F | 5.89564700  | -2.86105700 | 0.16672200  |
| O | -5.82847100 | -0.01647200 | 1.18163200  |
| H | -5.37656300 | 0.81240000  | 0.93100000  |
| C | -5.41528300 | -0.99009800 | 0.27912900  |
| H | -4.43770800 | -0.76506700 | -0.15919400 |
| C | -6.39396200 | -1.08066900 | -0.89886100 |
| F | -6.44441000 | 0.11047800  | -1.52789300 |
| F | -5.99434200 | -1.98743800 | -1.80414000 |
| F | -7.63287200 | -1.38606000 | -0.52000700 |
| C | -5.28556400 | -2.31801300 | 1.02992500  |
| F | -4.84659100 | -3.29179000 | 0.20981400  |
| F | -4.39077400 | -2.20739100 | 2.02215100  |
| F | -6.43830400 | -2.71671800 | 1.56199100  |

### S-TS4-iso7

|   |             |             |             |
|---|-------------|-------------|-------------|
| C | -0.71629200 | -0.96830500 | -0.67354300 |
| O | -1.45311900 | -1.42782400 | -1.53992500 |
| N | 0.47241500  | -0.38929800 | -0.97028100 |
| C | 1.43424400  | -0.00503500 | 0.02474300  |
| C | 2.34863600  | -0.93990400 | 0.51334500  |
| C | 1.40790700  | 1.33546200  | 0.45473100  |
| C | 3.24404400  | -0.48501500 | 1.49486500  |
| C | 2.33151000  | 1.73548800  | 1.43144700  |
| H | 1.31344800  | 2.27586500  | -0.53982600 |
| C | 3.24538800  | 0.82621100  | 1.95323800  |
| H | 3.95974200  | -1.18649200 | 1.91288500  |
| H | 2.32512600  | 2.76703200  | 1.77473000  |
| H | 3.96079600  | 1.12911300  | 2.71060300  |

|    |             |             |             |
|----|-------------|-------------|-------------|
| C  | 0.68769700  | 0.03864400  | -2.35292400 |
| H  | 0.30093700  | 1.05690600  | -2.47638000 |
| H  | 0.12025400  | -0.63174700 | -2.99968600 |
| C  | 2.37999700  | -2.39209800 | 0.07212500  |
| H  | 1.73809200  | -2.48620200 | -0.80745500 |
| C  | 3.78735600  | -2.83077100 | -0.34790500 |
| H  | 3.75444800  | -3.84821200 | -0.74990700 |
| H  | 4.17723000  | -2.17909900 | -1.13495700 |
| H  | 4.48245100  | -2.84038400 | 0.49762800  |
| C  | 1.83625500  | -3.30175000 | 1.18387100  |
| H  | 2.48037300  | -3.26536500 | 2.07065800  |
| H  | 0.82714700  | -3.00920500 | 1.49163600  |
| H  | 1.79967800  | -4.34010700 | 0.83840100  |
| C  | -1.17550400 | -1.01209300 | 0.76766300  |
| C  | -1.76733500 | -2.18259400 | 1.22767500  |
| C  | -2.32295600 | -2.20778300 | 2.50027400  |
| H  | -1.82868700 | -3.04466300 | 0.57246400  |
| C  | -1.70552600 | 0.08581900  | 2.73640800  |
| C  | -2.29040700 | -1.05190100 | 3.26889800  |
| H  | -2.80173500 | -3.10796800 | 2.86652800  |
| H  | -1.69870500 | 1.02459400  | 3.27818900  |
| H  | -2.73537500 | -1.01275900 | 4.25606300  |
| N  | -1.14813700 | 0.10827300  | 1.51524200  |
| C  | 0.39127000  | 4.00726800  | -1.00582000 |
| C  | -1.33023600 | 4.78654700  | 0.31743700  |
| C  | -1.46818600 | 5.48295900  | -1.05287300 |
| C  | -0.08587000 | 5.26030600  | -1.70434800 |
| H  | -1.02990800 | 5.49941500  | 1.09730200  |
| H  | -2.24952800 | 4.98397700  | -1.63387000 |
| H  | -1.74012100 | 6.53491200  | -0.96041600 |
| H  | -0.11826100 | 5.11574300  | -2.78636100 |
| H  | 0.61358900  | 6.07865800  | -1.49614000 |
| N  | -0.26257600 | 3.81434100  | 0.10793300  |
| O  | 1.29419600  | 3.20526000  | -1.42647200 |
| C  | -2.57282500 | 4.05310300  | 0.83914000  |
| O  | -3.67160000 | 4.59182700  | 0.77799500  |
| O  | -2.35737700 | 2.88163300  | 1.35739300  |
| Pd | -0.55391600 | 2.01799000  | 0.85504800  |
| C  | 2.15794000  | -0.05258900 | -2.73638700 |
| O  | 2.73685200  | -1.12396200 | -2.81229100 |
| N  | 2.74878100  | 1.14056200  | -3.01529200 |
| H  | 2.28283400  | 1.99942700  | -2.74254700 |
| C  | 4.15312300  | 1.17994600  | -3.32561600 |
| H  | 4.43938300  | 0.23778300  | -3.79341300 |



|   |             |             |             |
|---|-------------|-------------|-------------|
| H | 4.35582400  | 1.99149900  | -4.03342700 |
| C | 5.06427100  | 1.39184000  | -2.12804800 |
| O | 6.20384000  | 0.97124600  | -2.09356200 |
| O | 4.50617000  | 2.13386100  | -1.18284100 |
| C | 5.34779500  | 2.52206800  | -0.08981100 |
| H | 6.24462100  | 3.01993400  | -0.46578700 |
| H | 4.74652900  | 3.20729800  | 0.50451000  |
| H | 5.63663800  | 1.65769800  | 0.50913700  |
| O | -3.21328800 | -3.53494000 | -1.36458300 |
| H | -2.63674200 | -2.77911300 | -1.58664800 |
| C | -4.39826100 | -3.02178900 | -0.84864800 |
| H | -4.24840600 | -2.11725800 | -0.25053900 |
| C | -4.98267200 | -4.07755700 | 0.08628600  |
| F | -4.12260700 | -4.30678200 | 1.10138200  |
| F | -6.13587500 | -3.66691000 | 0.62364500  |
| F | -5.19394900 | -5.24234900 | -0.52371900 |
| C | -5.35604800 | -2.63103900 | -1.98123900 |
| F | -6.44490800 | -2.01658900 | -1.50353700 |
| F | -4.72704700 | -1.78290400 | -2.80629900 |
| F | -5.75425100 | -3.68327200 | -2.70175700 |
| O | -5.69991400 | 2.69007400  | 0.77749000  |
| H | -5.06875500 | 3.43960400  | 0.85404000  |
| C | -4.95678500 | 1.52182500  | 0.77711600  |
| H | -4.02732400 | 1.61804100  | 1.34746300  |
| C | -4.53232700 | 1.15742500  | -0.64983500 |
| F | -3.89882000 | 2.19691000  | -1.21693900 |
| F | -3.65645100 | 0.12579200  | -0.64592000 |
| F | -5.54992200 | 0.82095400  | -1.43852900 |
| C | -5.77634700 | 0.42596100  | 1.45094500  |
| F | -5.08853000 | -0.74300600 | 1.46060900  |
| F | -6.00304900 | 0.75065300  | 2.72848000  |
| F | -6.94696200 | 0.20020800  | 0.86267500  |
| O | 7.70404100  | 0.19015700  | 0.06545100  |
| H | 7.33756400  | 0.54503900  | -0.76697500 |
| C | 6.99145900  | -0.95677500 | 0.38341300  |
| H | 5.94599900  | -0.92135100 | 0.04634700  |
| C | 6.95212700  | -1.05908200 | 1.90734300  |
| F | 6.36209800  | 0.03884100  | 2.41599200  |
| F | 6.22300500  | -2.11826800 | 2.30611000  |
| F | 8.16002700  | -1.16245700 | 2.45072500  |
| C | 7.62811900  | -2.18073100 | -0.28982000 |
| F | 6.97697400  | -3.31284200 | 0.02008700  |
| F | 7.56432600  | -2.02006400 | -1.61734400 |
| F | 8.90703100  | -2.33350500 | 0.05169500  |

**TS6-iso1**

|   |             |             |             |
|---|-------------|-------------|-------------|
| C | 1.26380500  | 1.26091000  | 0.14244600  |
| O | 1.80410400  | 1.93685800  | -0.72659200 |
| N | -0.02549000 | 0.85056200  | 0.03593800  |
| C | -0.73590700 | 0.20973000  | 1.11023300  |
| C | -1.36683600 | 0.97999500  | 2.08526200  |
| C | -0.75673700 | -1.19813000 | 1.11832400  |
| C | -2.00120500 | 0.28059000  | 3.12501500  |
| C | -1.43255300 | -1.84371500 | 2.16420400  |
| H | -1.06982600 | -1.80181800 | -0.09960100 |
| C | -2.04496900 | -1.10452300 | 3.17156200  |
| H | -2.48686000 | 0.84907900  | 3.91332600  |
| H | -1.48545300 | -2.92661500 | 2.17850100  |
| H | -2.56027300 | -1.60756600 | 3.98404100  |
| C | -0.61008300 | 0.86510700  | -1.30414100 |
| H | -0.35334100 | -0.06716600 | -1.82089500 |
| H | -0.16523200 | 1.69766100  | -1.85215800 |
| C | -1.39022100 | 2.49676400  | 2.07184500  |
| H | -1.02028100 | 2.82492900  | 1.09673200  |
| C | -2.82163300 | 3.02691900  | 2.21789100  |
| H | -2.86454900 | 4.09534400  | 1.99212600  |
| H | -3.48909100 | 2.51143700  | 1.52286400  |
| H | -3.20669000 | 2.88504300  | 3.23455400  |
| C | -0.47120700 | 3.07357000  | 3.15717300  |
| H | -0.81216000 | 2.78040600  | 4.15733800  |
| H | 0.55946200  | 2.72318900  | 3.04041100  |
| H | -0.46793800 | 4.16746200  | 3.10994800  |
| C | 2.07976500  | 0.83266200  | 1.34239000  |
| C | 2.91280500  | 1.77353400  | 1.93620700  |
| C | 3.78455900  | 1.37005700  | 2.93975500  |
| H | 2.90949800  | 2.79669700  | 1.57598300  |
| C | 2.96927700  | -0.85514800 | 2.65428900  |
| C | 3.81261800  | 0.03106900  | 3.30529500  |
| H | 4.45372100  | 2.08803000  | 3.39857700  |
| H | 2.98955100  | -1.91704300 | 2.87125200  |
| H | 4.49533600  | -0.33689700 | 4.06200700  |
| N | 2.11097700  | -0.46636600 | 1.69812600  |
| C | -0.54770200 | -3.37202700 | -1.23507000 |
| C | 1.34369100  | -4.58205100 | -0.72817500 |
| C | 0.97812100  | -4.91694500 | -2.18908700 |
| C | -0.48197900 | -4.42462800 | -2.31336500 |
| H | 1.17185500  | -5.44098100 | -0.06553000 |

|    |             |             |             |
|----|-------------|-------------|-------------|
| H  | 1.63103100  | -4.35391400 | -2.86241200 |
| H  | 1.09719600  | -5.97681300 | -2.41559000 |
| H  | -0.73131500 | -4.00447100 | -3.29021500 |
| H  | -1.21472600 | -5.20642100 | -2.08618600 |
| N  | 0.41608700  | -3.51357000 | -0.37741000 |
| O  | -1.41447900 | -2.42300400 | -1.14282000 |
| C  | 2.77176400  | -4.08742500 | -0.45694400 |
| O  | 3.72404200  | -4.62540100 | -1.00925700 |
| O  | 2.87027100  | -3.11803600 | 0.40146800  |
| Pd | 1.12625800  | -2.04945500 | 0.71778400  |
| C  | -2.11330400 | 1.06691100  | -1.26069200 |
| O  | -2.62175900 | 2.10487300  | -0.84629200 |
| N  | -2.85388400 | 0.04084800  | -1.72783700 |
| H  | -2.41403300 | -0.86429100 | -1.85701700 |
| C  | -4.28839700 | 0.11599900  | -1.62948000 |
| H  | -4.66621800 | 1.00018800  | -2.14605000 |
| H  | -4.72691300 | -0.76774200 | -2.10117500 |
| C  | -4.73660700 | 0.13752900  | -0.17503000 |
| O  | -4.11348200 | -0.36680300 | 0.73622300  |
| O  | -5.89702600 | 0.75665900  | -0.03607700 |
| C  | -6.43815100 | 0.81175400  | 1.29163700  |
| H  | -5.75758400 | 1.35970700  | 1.94697700  |
| H  | -7.38125900 | 1.34427700  | 1.19252900  |
| H  | -6.59436200 | -0.19925500 | 1.67281100  |
| O  | 3.83427100  | 3.78152800  | -0.45179600 |
| H  | 3.14149900  | 3.14808200  | -0.71888800 |
| C  | 5.04190000  | 3.09472400  | -0.40030500 |
| H  | 4.93650600  | 2.06834400  | -0.03376900 |
| C  | 5.93721400  | 3.82801300  | 0.59504100  |
| F  | 5.36743200  | 3.79807100  | 1.81928500  |
| F  | 7.13346600  | 3.23911100  | 0.69625700  |
| F  | 6.12209400  | 5.10695800  | 0.27639500  |
| C  | 5.66702300  | 2.98566100  | -1.79725800 |
| F  | 6.73883300  | 2.18482900  | -1.78454700 |
| F  | 4.76337800  | 2.46112700  | -2.63597000 |
| F  | 6.03940600  | 4.17175200  | -2.28689700 |
| O  | 5.90902300  | -2.90947600 | -1.04282800 |
| H  | 5.21701900  | -3.60737000 | -1.00916900 |
| C  | 5.38699600  | -1.77079800 | -0.45364600 |
| H  | 4.64790000  | -2.00176000 | 0.32008900  |
| C  | 4.64904300  | -0.92209300 | -1.49410600 |
| F  | 3.71912800  | -1.66459300 | -2.11540900 |
| F  | 3.99220800  | 0.10462200  | -0.90375300 |
| F  | 5.44921500  | -0.40908300 | -2.42487900 |

|   |             |             |             |
|---|-------------|-------------|-------------|
| C | 6.52455900  | -1.01782400 | 0.22930000  |
| F | 6.06612400  | 0.12370100  | 0.80061600  |
| F | 7.03342400  | -1.76566300 | 1.21463600  |
| F | 7.51177400  | -0.68729200 | -0.59726400 |
| O | -3.83147100 | 4.56656200  | -0.53565400 |
| H | -3.14703000 | 3.88895500  | -0.66836000 |
| C | -5.05196000 | 3.91588200  | -0.64454900 |
| H | -4.98941200 | 2.85886900  | -0.37276500 |
| C | -5.55051700 | 3.94786400  | -2.09449200 |
| F | -4.59562900 | 3.43639200  | -2.89302800 |
| F | -6.64610200 | 3.18882400  | -2.25260800 |
| F | -5.82799600 | 5.17805900  | -2.52251100 |
| C | -6.03211200 | 4.54970700  | 0.34013100  |
| F | -7.25188100 | 3.99566900  | 0.21939100  |
| F | -5.61942600 | 4.32610200  | 1.59830800  |
| F | -6.15400900 | 5.86392600  | 0.17359600  |
| O | -4.37575200 | -2.98570700 | 1.61996000  |
| H | -4.26678300 | -2.01864300 | 1.60675400  |
| C | -4.15644300 | -3.42866700 | 0.32286200  |
| H | -3.45042500 | -2.79628600 | -0.22732800 |
| C | -5.46275700 | -3.44581100 | -0.48883300 |
| F | -6.13494500 | -2.29604400 | -0.29070700 |
| F | -5.20188700 | -3.52567800 | -1.80506100 |
| F | -6.27665300 | -4.44728600 | -0.16209100 |
| C | -3.52084600 | -4.81752300 | 0.39946100  |
| F | -3.44217100 | -5.37265400 | -0.82359600 |
| F | -2.26387400 | -4.72728500 | 0.87114400  |
| F | -4.19285600 | -5.64449200 | 1.19190600  |

## TS6-iso2

|   |             |             |             |
|---|-------------|-------------|-------------|
| C | 1.69473200  | 0.79133400  | 0.16601700  |
| O | 2.12646800  | 1.56843800  | -0.67682100 |
| N | 0.49556600  | 0.16695600  | 0.02582400  |
| C | -0.11774100 | -0.58526900 | 1.08527300  |
| C | -0.85162100 | 0.07239900  | 2.07387300  |
| C | 0.06988300  | -1.98054400 | 1.07370600  |
| C | -1.34400500 | -0.72449400 | 3.11975100  |
| C | -0.47749900 | -2.73118000 | 2.12473500  |
| H | -0.13781800 | -2.60177300 | -0.13739000 |
| C | -1.16389600 | -2.10121800 | 3.15772900  |
| H | -1.89218700 | -0.24293000 | 3.92535700  |
| H | -0.34854700 | -3.81022600 | 2.12870900  |
| H | -1.56260900 | -2.67638500 | 3.98829500  |

|    |             |             |             |
|----|-------------|-------------|-------------|
| C  | -0.05413200 | 0.06590300  | -1.32245300 |
| H  | 0.29856100  | -0.85955300 | -1.79134400 |
| H  | 0.32124600  | 0.91418400  | -1.89769500 |
| C  | -1.11906700 | 1.56609700  | 2.06887400  |
| H  | -0.77217100 | 1.96155600  | 1.11072000  |
| C  | -2.62193500 | 1.86056700  | 2.16262100  |
| H  | -2.81612800 | 2.91701100  | 1.96238700  |
| H  | -3.18129200 | 1.27987700  | 1.42379300  |
| H  | -3.02007200 | 1.63045900  | 3.15830600  |
| C  | -0.34909500 | 2.27337700  | 3.19238900  |
| H  | -0.67872300 | 1.92346300  | 4.17800400  |
| H  | 0.72850400  | 2.09502400  | 3.11734900  |
| H  | -0.52122400 | 3.35332800  | 3.14497200  |
| C  | 2.55020700  | 0.46994200  | 1.37179100  |
| C  | 3.20909800  | 1.51464700  | 2.00825800  |
| C  | 4.12018100  | 1.22761100  | 3.01711000  |
| H  | 3.04395300  | 2.53417900  | 1.67695100  |
| C  | 3.68313200  | -1.09084300 | 2.65302300  |
| C  | 4.36131900  | -0.09966400 | 3.34477100  |
| H  | 4.65475300  | 2.03093500  | 3.50965900  |
| H  | 3.87107700  | -2.14153200 | 2.84183700  |
| H  | 5.08334800  | -0.37551600 | 4.10406700  |
| N  | 2.78673300  | -0.81740600 | 1.69209300  |
| C  | 0.63821200  | -3.99977300 | -1.36041800 |
| C  | 2.72469200  | -4.88157900 | -0.92419300 |
| C  | 2.42767100  | -5.15169300 | -2.41360000 |
| C  | 0.90067600  | -4.94033500 | -2.51446800 |
| H  | 2.71692600  | -5.81347800 | -0.34253300 |
| H  | 2.95718700  | -4.41678600 | -3.02723700 |
| H  | 2.74958400  | -6.14425400 | -2.73028400 |
| H  | 0.56893800  | -4.50372400 | -3.45893900 |
| H  | 0.33861000  | -5.86886400 | -2.35921400 |
| N  | 1.61606900  | -4.03386200 | -0.49786600 |
| O  | -0.38144900 | -3.23645100 | -1.22036300 |
| C  | 4.04384000  | -4.16797400 | -0.59898100 |
| O  | 5.08165300  | -4.51437700 | -1.14912300 |
| O  | 3.96782600  | -3.23468000 | 0.30199700  |
| Pd | 2.07491300  | -2.50716200 | 0.65254000  |
| C  | -1.56848100 | 0.13325800  | -1.31005000 |
| O  | -2.17032200 | 1.13016600  | -0.92129200 |
| N  | -2.21179600 | -0.95747700 | -1.77198000 |
| H  | -1.70527900 | -1.83148800 | -1.87216700 |
| C  | -3.65530400 | -0.95217200 | -1.80477400 |
| H  | -4.01507300 | -0.09299900 | -2.37302000 |

|   |             |             |             |
|---|-------------|-------------|-------------|
| H | -4.00090500 | -1.86648900 | -2.29448800 |
| C | -4.29259200 | -0.88726300 | -0.42595700 |
| O | -5.24863500 | -0.18551700 | -0.16294800 |
| O | -3.72091100 | -1.70512700 | 0.44198800  |
| C | -4.34168500 | -1.77177300 | 1.73341500  |
| H | -5.37942000 | -2.09274900 | 1.63233800  |
| H | -3.76278600 | -2.50465900 | 2.29059400  |
| H | -4.29577600 | -0.79661300 | 2.22319600  |
| O | 3.82400700  | 3.70988100  | -0.27348200 |
| H | 3.26663900  | 2.97653700  | -0.59517800 |
| C | 5.14158000  | 3.26681200  | -0.23742100 |
| H | 5.23618100  | 2.22169900  | 0.07477300  |
| C | 5.87100100  | 4.10696000  | 0.80780200  |
| F | 5.31172200  | 3.90183200  | 2.02025200  |
| F | 7.15879900  | 3.75958600  | 0.89774200  |
| F | 5.80171100  | 5.41195000  | 0.55656800  |
| C | 5.78274700  | 3.35726100  | -1.62823400 |
| F | 6.99338800  | 2.78708500  | -1.63843800 |
| F | 5.00664700  | 2.70388000  | -2.50411300 |
| F | 5.91136600  | 4.61642600  | -2.05408100 |
| O | 6.98406500  | -2.48667000 | -1.00006200 |
| H | 6.40195100  | -3.27823900 | -1.03494500 |
| C | 6.27061800  | -1.46495100 | -0.39851000 |
| H | 5.55204800  | -1.83349000 | 0.34065600  |
| C | 5.44336700  | -0.70204300 | -1.43913300 |
| F | 4.68559000  | -1.55894000 | -2.14031600 |
| F | 4.59310800  | 0.16453900  | -0.83834000 |
| F | 6.18243300  | -0.00932200 | -2.30181500 |
| C | 7.25265200  | -0.56752700 | 0.34844300  |
| F | 6.60278800  | 0.47665900  | 0.92081700  |
| F | 7.82807700  | -1.25473400 | 1.34135300  |
| F | 8.21057700  | -0.07052900 | -0.42690000 |
| O | -3.42468900 | 3.57699400  | -0.62591600 |
| H | -2.71665200 | 2.92174700  | -0.74167000 |
| C | -4.61909600 | 2.88479500  | -0.78784600 |
| H | -4.54735600 | 1.84198000  | -0.46981400 |
| C | -5.02085400 | 2.84772000  | -2.26666400 |
| F | -3.99469900 | 2.35798900  | -2.98785000 |
| F | -6.06799100 | 2.02586600  | -2.47092700 |
| F | -5.33264600 | 4.04313600  | -2.76078700 |
| C | -5.68023700 | 3.52438000  | 0.10313200  |
| F | -6.86328300 | 2.91097700  | -0.06206100 |
| F | -5.33205700 | 3.38799600  | 1.39159900  |
| F | -5.84548800 | 4.82371400  | -0.14135400 |

|   |              |             |             |
|---|--------------|-------------|-------------|
| O | -7.88011100  | -0.09990600 | -1.15067900 |
| H | -6.95964400  | 0.20120600  | -1.15677100 |
| C | -8.12907300  | -0.63113700 | 0.10663100  |
| H | -7.41674200  | -0.27895400 | 0.85903800  |
| C | -8.00842500  | -2.16284400 | 0.07717400  |
| F | -6.88488300  | -2.52389000 | -0.57049000 |
| F | -7.91634600  | -2.66041100 | 1.32530300  |
| F | -9.03078700  | -2.76226400 | -0.53122000 |
| C | -9.51347800  | -0.16047500 | 0.55738500  |
| F | -9.86468400  | -0.75844300 | 1.70917800  |
| F | -9.48898500  | 1.15846400  | 0.77060100  |
| F | -10.45531600 | -0.41850100 | -0.34864100 |

### TS6-iso3

|   |             |             |             |
|---|-------------|-------------|-------------|
| C | 1.48696500  | 1.51434100  | -0.44647300 |
| O | 2.21369100  | 1.83275800  | -1.38421300 |
| N | 0.15128100  | 1.37566800  | -0.59922100 |
| C | -0.75118600 | 1.07431000  | 0.47736400  |
| C | -1.30050900 | 2.10686900  | 1.23558100  |
| C | -1.04748800 | -0.28557200 | 0.69149600  |
| C | -2.26780900 | 1.73820200  | 2.18336300  |
| C | -1.99455600 | -0.59639700 | 1.67730700  |
| H | -1.21575500 | -1.07226500 | -0.48046700 |
| C | -2.62898500 | 0.41492500  | 2.39199300  |
| H | -2.75123600 | 2.51467200  | 2.76815000  |
| H | -2.24340200 | -1.63256600 | 1.87587400  |
| H | -3.38830300 | 0.17030000  | 3.12805900  |
| C | -0.34964100 | 1.34226600  | -1.97592000 |
| H | -0.06251400 | 0.39280100  | -2.44088500 |
| H | 0.12860600  | 2.14911300  | -2.53720600 |
| C | -0.81493900 | 3.54445800  | 1.15179800  |
| H | -0.09476700 | 3.60894900  | 0.33058400  |
| C | -1.92377400 | 4.55969700  | 0.85719100  |
| H | -1.51173600 | 5.57406400  | 0.88432100  |
| H | -2.33702600 | 4.38790500  | -0.13868600 |
| H | -2.72819200 | 4.50725000  | 1.59741700  |
| C | -0.08386900 | 3.90819500  | 2.45531600  |
| H | -0.78377800 | 3.94237400  | 3.29822300  |
| H | 0.69553700  | 3.17864200  | 2.69754200  |
| H | 0.38431100  | 4.89433000  | 2.36693800  |
| C | 2.09219400  | 1.27673300  | 0.91917900  |
| C | 3.01866300  | 2.20001300  | 1.38770300  |
| C | 3.66317800  | 1.96006900  | 2.59485500  |

|    |             |             |             |
|----|-------------|-------------|-------------|
| H  | 3.25728400  | 3.07268500  | 0.78960000  |
| C  | 2.45408300  | -0.09283800 | 2.75091100  |
| C  | 3.37154600  | 0.79506400  | 3.29112800  |
| H  | 4.40089600  | 2.66240000  | 2.96448500  |
| H  | 2.22982300  | -1.03781200 | 3.23214400  |
| H  | 3.86281900  | 0.55427000  | 4.22645000  |
| N  | 1.81862700  | 0.14281600  | 1.59281400  |
| C  | -0.73958900 | -2.88943400 | -1.19073200 |
| C  | 0.67585200  | -4.27003500 | -0.01171700 |
| C  | 0.55461000  | -4.86677400 | -1.43301000 |
| C  | -0.64865300 | -4.12121200 | -2.05369600 |
| H  | 0.21617700  | -4.92251200 | 0.74002600  |
| H  | 1.47088800  | -4.65690400 | -1.99156100 |
| H  | 0.41716300  | -5.94818100 | -1.41250300 |
| H  | -0.51027900 | -3.85028300 | -3.10294700 |
| H  | -1.58579300 | -4.68026700 | -1.97224300 |
| N  | -0.07567300 | -3.02361100 | -0.08289800 |
| O  | -1.39774100 | -1.81709100 | -1.46798700 |
| C  | 2.09821600  | -3.94835700 | 0.46901000  |
| O  | 3.00740600  | -4.74525600 | 0.26568000  |
| O  | 2.23724400  | -2.82337700 | 1.10227400  |
| Pd | 0.69709900  | -1.46690500 | 0.83491500  |
| C  | -1.85575200 | 1.55659200  | -2.04158200 |
| O  | -2.36640900 | 2.61546300  | -1.67368900 |
| N  | -2.55742500 | 0.54427700  | -2.58910800 |
| H  | -2.12278300 | -0.37264900 | -2.61492300 |
| C  | -3.99290200 | 0.59883400  | -2.68856400 |
| H  | -4.31005900 | 1.63362400  | -2.82684100 |
| H  | -4.32732700 | 0.02880900  | -3.56029000 |
| C  | -4.68067400 | 0.04449100  | -1.45156200 |
| O  | -4.08163600 | -0.45350100 | -0.52022100 |
| O  | -5.98840200 | 0.16992700  | -1.54245900 |
| C  | -6.74452400 | -0.19480100 | -0.37876600 |
| H  | -6.42799300 | 0.42404700  | 0.46205500  |
| H  | -7.78200400 | 0.01086900  | -0.63341600 |
| H  | -6.60540300 | -1.25338200 | -0.15552800 |
| O  | 4.49776000  | 3.34557100  | -1.24365700 |
| H  | 3.74666400  | 2.75394600  | -1.44598400 |
| C  | 5.57892400  | 2.55654000  | -0.86753300 |
| H  | 5.28783000  | 1.67704800  | -0.28377400 |
| C  | 6.46786700  | 3.40873400  | 0.03413500  |
| F  | 5.78669800  | 3.74485200  | 1.15105600  |
| F  | 7.55733200  | 2.73523400  | 0.41776800  |
| F  | 6.85531800  | 4.54147700  | -0.54828900 |



|   |             |             |             |
|---|-------------|-------------|-------------|
| C | 6.31732900  | 2.02628100  | -2.10334500 |
| F | 7.25755100  | 1.13797700  | -1.76088200 |
| F | 5.43554200  | 1.41302100  | -2.90431100 |
| F | 6.90169400  | 2.99997100  | -2.80790700 |
| O | 5.43917500  | -3.42983800 | 0.16230400  |
| H | 4.64179900  | -3.99628800 | 0.26723400  |
| C | 5.04654100  | -2.11600300 | 0.35221300  |
| H | 4.18234500  | -2.03040900 | 1.01922800  |
| C | 4.61106700  | -1.49317900 | -0.97802600 |
| F | 3.65232500  | -2.24445600 | -1.54317700 |
| F | 4.07693600  | -0.26391000 | -0.78721700 |
| F | 5.60326700  | -1.37059500 | -1.85640700 |
| C | 6.19447700  | -1.36073900 | 1.01492300  |
| F | 5.85986100  | -0.06025600 | 1.21121800  |
| F | 6.44172900  | -1.88163600 | 2.22118700  |
| F | 7.32156400  | -1.38295800 | 0.30978100  |
| O | -4.54768300 | 2.48856700  | -0.01434600 |
| H | -3.75897600 | 2.59621000  | -0.58848900 |
| C | -5.26802700 | 3.67122500  | 0.02897700  |
| H | -4.63755200 | 4.56373300  | -0.06776800 |
| C | -5.92782900 | 3.74767700  | 1.40777700  |
| F | -4.98774000 | 3.87023700  | 2.35864100  |
| F | -6.74008400 | 4.80546100  | 1.49986400  |
| F | -6.63859700 | 2.65045900  | 1.68552600  |
| C | -6.28841400 | 3.73470600  | -1.11586700 |
| F | -6.87267300 | 4.93521200  | -1.18464700 |
| F | -5.65125900 | 3.52604100  | -2.28129800 |
| F | -7.24751800 | 2.81152100  | -1.00154200 |
| O | -4.58849600 | -2.57987000 | 1.09544700  |
| H | -4.51249300 | -1.68061300 | 0.71895800  |
| C | -3.87708000 | -3.41854100 | 0.24620300  |
| H | -3.10237100 | -2.87958100 | -0.30956600 |
| C | -4.81232100 | -4.02896800 | -0.80531600 |
| F | -5.38781200 | -3.04017000 | -1.51342700 |
| F | -4.13671000 | -4.79840400 | -1.67669400 |
| F | -5.78342300 | -4.76381300 | -0.26954000 |
| C | -3.17965900 | -4.48140500 | 1.09811800  |
| F | -2.46207400 | -5.32210700 | 0.32705700  |
| F | -2.32216900 | -3.90266200 | 1.95150900  |
| F | -4.03819200 | -5.20754200 | 1.80827500  |

#### TS6-iso4

|   |            |            |            |
|---|------------|------------|------------|
| C | 1.49832200 | 1.28988200 | 0.10316100 |
|---|------------|------------|------------|

|   |             |             |             |
|---|-------------|-------------|-------------|
| O | 2.11644600  | 1.90605100  | -0.75917100 |
| N | 0.17420600  | 1.02168600  | -0.02035300 |
| C | -0.60819900 | 0.41647900  | 1.02230000  |
| C | -1.18908000 | 1.21517600  | 2.00781500  |
| C | -0.74846100 | -0.98364500 | 0.98996000  |
| C | -1.89920300 | 0.54437800  | 3.01607900  |
| C | -1.50726500 | -1.59510000 | 1.99865000  |
| H | -1.01368200 | -1.53622900 | -0.26113300 |
| C | -2.07315000 | -0.83320000 | 3.01532000  |
| H | -2.33746700 | 1.12894400  | 3.82085100  |
| H | -1.64726000 | -2.67113300 | 1.98166700  |
| H | -2.64546500 | -1.30891100 | 3.80589900  |
| C | -0.38682700 | 1.11883000  | -1.36815900 |
| H | -0.17118400 | 0.19190000  | -1.91190000 |
| H | 0.11348200  | 1.94233600  | -1.88034000 |
| C | -1.04813800 | 2.72616600  | 2.04969200  |
| H | -0.65418100 | 3.04716000  | 1.08129900  |
| C | -2.39836300 | 3.42457000  | 2.24566300  |
| H | -2.27840800 | 4.50599300  | 2.12742600  |
| H | -3.13886500 | 3.08834000  | 1.51785400  |
| H | -2.80503700 | 3.25527100  | 3.24997300  |
| C | -0.05935200 | 3.14872100  | 3.14608200  |
| H | -0.43529700 | 2.87094200  | 4.13806500  |
| H | 0.91866300  | 2.67557800  | 3.01659500  |
| H | 0.08202400  | 4.23450500  | 3.13266300  |
| C | 2.25316500  | 0.78946800  | 1.31566900  |
| C | 3.15718300  | 1.65644100  | 1.91855800  |
| C | 3.96813900  | 1.18752100  | 2.94403300  |
| H | 3.25278000  | 2.67189500  | 1.54983000  |
| C | 2.95964700  | -0.95705400 | 2.66146700  |
| C | 3.86471100  | -0.14376900 | 3.32442700  |
| H | 4.68996200  | 1.84762900  | 3.40990200  |
| H | 2.87804500  | -2.01412600 | 2.88698000  |
| H | 4.49310600  | -0.56342200 | 4.10104700  |
| N | 2.16071700  | -0.50306300 | 1.68231500  |
| C | -0.57418400 | -3.14128100 | -1.38022100 |
| C | 1.12986700  | -4.55814300 | -0.74582400 |
| C | 0.84709700  | -4.83518600 | -2.23855500 |
| C | -0.53381400 | -4.18290100 | -2.47088100 |
| H | 0.83960400  | -5.41078700 | -0.11749300 |
| H | 1.61097700  | -4.34269200 | -2.84727700 |
| H | 0.86745100  | -5.89953500 | -2.47479400 |
| H | -0.65354400 | -3.72575300 | -3.45550000 |
| H | -1.36277000 | -4.88406800 | -2.32213300 |

|    |             |             |             |
|----|-------------|-------------|-------------|
| N  | 0.28169900  | -3.41274000 | -0.43565500 |
| O  | -1.31561900 | -2.09681400 | -1.35416000 |
| C  | 2.57860900  | -4.20287100 | -0.38130400 |
| O  | 3.50617700  | -4.83626800 | -0.87097800 |
| O  | 2.72072600  | -3.23633900 | 0.47511900  |
| Pd | 1.07556400  | -2.00258600 | 0.68000900  |
| C  | -1.87946600 | 1.41354300  | -1.36396000 |
| O  | -2.30697000 | 2.50518800  | -0.98861000 |
| N  | -2.64543100 | 0.42295100  | -1.85916500 |
| H  | -2.22555600 | -0.49296300 | -1.98389800 |
| C  | -4.07669200 | 0.52050000  | -2.01100100 |
| H  | -4.34701700 | 1.54699500  | -2.27747000 |
| H  | -4.40027600 | -0.13383500 | -2.82139500 |
| C  | -4.87482400 | 0.15332200  | -0.77093100 |
| O  | -5.96537500 | -0.38248700 | -0.83828700 |
| O  | -4.27482900 | 0.51924800  | 0.34446000  |
| C  | -5.04086100 | 0.41127500  | 1.55095800  |
| H  | -5.12982200 | -0.63781500 | 1.83934500  |
| H  | -4.47825600 | 0.96944600  | 2.29554200  |
| H  | -6.02548500 | 0.85768800  | 1.40216400  |
| O  | 4.30494700  | 3.54622100  | -0.44896000 |
| H  | 3.55767800  | 2.98213700  | -0.72570000 |
| C  | 5.44229900  | 2.74823800  | -0.39853600 |
| H  | 5.24112300  | 1.73713600  | -0.02981700 |
| C  | 6.40518600  | 3.39364500  | 0.59465100  |
| F  | 5.84755100  | 3.39681100  | 1.82464900  |
| F  | 7.55088400  | 2.70959400  | 0.67633100  |
| F  | 6.68909500  | 4.65713600  | 0.28623400  |
| C  | 6.05196600  | 2.58018000  | -1.79638200 |
| F  | 7.04535100  | 1.68416500  | -1.78576500 |
| F  | 5.10173800  | 2.13904200  | -2.63226000 |
| F  | 6.53074100  | 3.72660300  | -2.28841200 |
| O  | 5.80829100  | -3.29254500 | -0.94923300 |
| H  | 5.07551000  | -3.94544100 | -0.89299000 |
| C  | 5.36013500  | -2.11273700 | -0.38050000 |
| H  | 4.59752600  | -2.28142200 | 0.38674000  |
| C  | 4.69642500  | -1.22843500 | -1.44156100 |
| F  | 3.71278600  | -1.90762900 | -2.05438600 |
| F  | 4.12001200  | -0.14150400 | -0.87662800 |
| F  | 5.53864200  | -0.79902600 | -2.37723700 |
| C  | 6.53778200  | -1.42943900 | 0.30839000  |
| F  | 6.14599000  | -0.25996100 | 0.87328800  |
| F  | 6.99282900  | -2.20370200 | 1.29901200  |
| F  | 7.54897800  | -1.16211500 | -0.51211100 |

|   |             |             |             |
|---|-------------|-------------|-------------|
| O | -4.83169500 | 3.14904500  | -0.27127500 |
| H | -3.92360100 | 2.84227300  | -0.48750200 |
| C | -4.93004100 | 4.48250200  | -0.64694900 |
| H | -3.95169200 | 4.97093200  | -0.73259200 |
| C | -5.70525200 | 5.22020100  | 0.44639800  |
| F | -5.00194300 | 5.20045200  | 1.58748600  |
| F | -5.90997000 | 6.50192600  | 0.11474100  |
| F | -6.88948600 | 4.65488400  | 0.68492100  |
| C | -5.59471100 | 4.57850700  | -2.02484900 |
| F | -5.62771600 | 5.83620000  | -2.47661300 |
| F | -4.87654800 | 3.85061300  | -2.90376200 |
| F | -6.83809600 | 4.09744100  | -2.02280400 |
| O | -6.36487500 | -2.59369000 | 0.74829900  |
| H | -6.42373200 | -1.74392400 | 0.27006500  |
| C | -5.72827300 | -3.50717200 | -0.07959400 |
| H | -5.82246800 | -3.25762600 | -1.14363600 |
| C | -6.39710900 | -4.87021800 | 0.11732600  |
| F | -7.66581700 | -4.80970500 | -0.29370600 |
| F | -5.77227200 | -5.81478600 | -0.60392900 |
| F | -6.38747800 | -5.24959700 | 1.39508100  |
| C | -4.22512000 | -3.53434200 | 0.22882300  |
| F | -3.54742000 | -4.31544200 | -0.62703000 |
| F | -3.73423100 | -2.28835200 | 0.10733800  |
| F | -3.95493700 | -3.95033000 | 1.46849000  |

### TS7-isol

|   |             |             |             |
|---|-------------|-------------|-------------|
| C | -0.38745200 | 2.19000500  | 2.29525400  |
| O | -0.57509300 | 3.39689500  | 2.13855100  |
| N | 0.62449600  | 1.51527900  | 1.69582700  |
| C | 0.59590700  | 0.07262700  | 1.65437600  |
| C | 1.37261600  | -0.67675500 | 2.53057900  |
| C | -0.28565100 | -0.51142700 | 0.72110000  |
| C | 1.19932500  | -2.07106600 | 2.49287000  |
| C | -0.41871300 | -1.90728100 | 0.73304700  |
| H | -0.15471900 | -0.17592200 | -0.56416700 |
| C | 0.31585000  | -2.68669300 | 1.61919800  |
| H | 1.78512200  | -2.68557800 | 3.17098500  |
| H | -1.09915100 | -2.37806300 | 0.03398400  |
| H | 0.20757700  | -3.76644100 | 1.61283700  |
| C | 1.31959800  | 2.23924200  | 0.62687600  |
| H | 1.62512100  | 3.21268200  | 1.01684000  |
| H | 0.62482100  | 2.40228400  | -0.20279700 |
| C | 2.37169500  | -0.06307100 | 3.49132800  |

|    |             |             |             |
|----|-------------|-------------|-------------|
| H  | 2.45730500  | 0.99857500  | 3.24317000  |
| C  | 1.89618100  | -0.18713100 | 4.94437700  |
| H  | 2.61637600  | 0.28266400  | 5.62263000  |
| H  | 0.92182300  | 0.29064900  | 5.08991400  |
| H  | 1.79732600  | -1.23923600 | 5.23678200  |
| C  | 3.75666200  | -0.69342300 | 3.30304000  |
| H  | 3.79496200  | -1.71410300 | 3.70102200  |
| H  | 4.01442300  | -0.73138100 | 2.24237100  |
| H  | 4.52524400  | -0.10814000 | 3.81452500  |
| C  | -1.32832100 | 1.41891400  | 3.19902900  |
| C  | -1.35978600 | 1.68104500  | 4.56056300  |
| C  | -2.29380700 | 1.01499300  | 5.34783600  |
| H  | -0.66443700 | 2.39711100  | 4.98373100  |
| C  | -3.10497000 | -0.05724900 | 3.37036500  |
| C  | -3.17657100 | 0.12832400  | 4.74397400  |
| H  | -2.33367300 | 1.19269200  | 6.41749200  |
| H  | -3.77319100 | -0.73259700 | 2.85411900  |
| H  | -3.92214900 | -0.41292500 | 5.31441800  |
| N  | -2.20041000 | 0.57726800  | 2.61550300  |
| C  | -1.19206400 | 0.27959300  | -2.26053800 |
| C  | -3.31072000 | 1.14770000  | -2.05645000 |
| C  | -3.22415700 | 0.55884800  | -3.47207300 |
| C  | -1.69595400 | 0.40294500  | -3.68070000 |
| H  | -3.22492100 | 2.24201400  | -2.07115600 |
| H  | -3.71538400 | -0.41839200 | -3.48936300 |
| H  | -3.69573400 | 1.19472300  | -4.22242500 |
| H  | -1.40616100 | -0.47471100 | -4.26221400 |
| H  | -1.24639100 | 1.28603500  | -4.14629900 |
| N  | -2.11896400 | 0.60846900  | -1.41914800 |
| O  | -0.02611600 | -0.10852800 | -1.88130500 |
| C  | -4.48138200 | 0.81729900  | -1.13268300 |
| O  | -5.58699600 | 0.52741900  | -1.57724400 |
| O  | -4.18366000 | 0.89551600  | 0.13355700  |
| Pd | -2.16535500 | 0.45613500  | 0.51932500  |
| C  | 2.56730700  | 1.50633700  | 0.16197100  |
| O  | 3.56836900  | 1.41247300  | 0.86766600  |
| N  | 2.50467000  | 1.01939100  | -1.09206300 |
| H  | 1.59708600  | 0.91220900  | -1.53834800 |
| C  | 3.59357000  | 0.23974400  | -1.61212900 |
| H  | 4.53963600  | 0.76849800  | -1.48441700 |
| H  | 3.43908000  | 0.07969700  | -2.68213500 |
| C  | 3.67500300  | -1.12767800 | -0.95469200 |
| O  | 2.77108100  | -1.64247300 | -0.32915200 |
| O  | 4.85695200  | -1.68496100 | -1.16605600 |

|   |             |             |             |
|---|-------------|-------------|-------------|
| C | 5.04739500  | -3.00448100 | -0.63524700 |
| H | 6.07774300  | -3.26111600 | -0.87081000 |
| H | 4.89467000  | -2.99567700 | 0.44653000  |
| H | 4.35057900  | -3.69855100 | -1.11015400 |
| O | -1.49021300 | 3.50791000  | -0.48777800 |
| H | -1.34190400 | 3.62961400  | 0.46963000  |
| C | -1.06228200 | 4.63971100  | -1.16719000 |
| H | -0.20740200 | 5.13086000  | -0.68452600 |
| C | -2.19963700 | 5.66847000  | -1.22872900 |
| F | -2.53639300 | 6.00585800  | 0.02235600  |
| F | -1.82233700 | 6.77877300  | -1.87379200 |
| F | -3.28217400 | 5.17713000  | -1.83342200 |
| C | -0.58684700 | 4.19435600  | -2.55164200 |
| F | -0.07896100 | 5.21748600  | -3.24026700 |
| F | 0.37798300  | 3.26468600  | -2.42755700 |
| F | -1.57091400 | 3.65097600  | -3.27841000 |
| O | -6.60953000 | -1.68244900 | -0.33299600 |
| H | -6.43790300 | -0.85035200 | -0.82552500 |
| C | -5.70820100 | -1.71277800 | 0.71801700  |
| H | -5.29909300 | -0.71903000 | 0.93912300  |
| C | -4.50898100 | -2.59773500 | 0.35701200  |
| F | -3.94071900 | -2.15625000 | -0.77788200 |
| F | -3.55130400 | -2.54503300 | 1.31536700  |
| F | -4.82720800 | -3.87808100 | 0.18173200  |
| C | -6.43957100 | -2.18766900 | 1.97098200  |
| F | -5.58787500 | -2.26727600 | 3.02478100  |
| F | -7.39071000 | -1.31101200 | 2.30068900  |
| F | -7.00471600 | -3.38464600 | 1.82604300  |
| O | 6.09931200  | 1.22828400  | 1.96322500  |
| H | 5.18984300  | 1.49004100  | 1.73814600  |
| C | 6.50857000  | 0.33410000  | 0.98614600  |
| H | 5.67171900  | -0.19453600 | 0.52037400  |
| C | 7.37513900  | -0.74074200 | 1.64156100  |
| F | 6.63386700  | -1.46341000 | 2.49549100  |
| F | 7.85918700  | -1.59130100 | 0.71938100  |
| F | 8.40176700  | -0.22979800 | 2.31615700  |
| C | 7.22799000  | 1.07474900  | -0.14873900 |
| F | 7.50148200  | 0.25950300  | -1.17679400 |
| F | 6.41637500  | 2.04387400  | -0.61414500 |
| F | 8.36384300  | 1.64735800  | 0.24663500  |
| O | 1.55921400  | -3.91958600 | -1.34220200 |
| H | 1.97652000  | -3.27148100 | -0.74792500 |
| C | 0.78638300  | -3.19662800 | -2.24653900 |
| H | 0.55306800  | -2.18612400 | -1.89476900 |

|   |             |             |             |
|---|-------------|-------------|-------------|
| C | -0.55543500 | -3.90844200 | -2.45326700 |
| F | -1.11030700 | -4.20631600 | -1.27071000 |
| F | -1.40980300 | -3.10444600 | -3.11013700 |
| F | -0.44233800 | -5.04341200 | -3.14415100 |
| C | 1.54717200  | -3.01740000 | -3.56385600 |
| F | 0.82183000  | -2.33708000 | -4.46300000 |
| F | 2.67294100  | -2.30472300 | -3.33552800 |
| F | 1.91962100  | -4.17099000 | -4.11191100 |

## TS7-iso2

|   |             |             |             |
|---|-------------|-------------|-------------|
| C | -0.27463100 | 2.44702700  | 2.09503400  |
| O | -0.26159100 | 3.67282000  | 1.99898100  |
| N | 0.63025500  | 1.63791200  | 1.49327700  |
| C | 0.50399800  | 0.20387700  | 1.56524300  |
| C | 1.20496500  | -0.51427500 | 2.52961300  |
| C | -0.38766200 | -0.40525100 | 0.66020900  |
| C | 0.93476200  | -1.89045900 | 2.61368300  |
| C | -0.61738900 | -1.78285000 | 0.79299600  |
| H | -0.20095800 | -0.20232600 | -0.65676500 |
| C | 0.03409700  | -2.52421800 | 1.77100600  |
| H | 1.45517200  | -2.47634600 | 3.36629100  |
| H | -1.31088800 | -2.26934200 | 0.11816300  |
| H | -0.15064500 | -3.58965100 | 1.86113800  |
| C | 1.47674100  | 2.25196200  | 0.46491000  |
| H | 1.91110700  | 3.16810500  | 0.86911100  |
| H | 0.86422100  | 2.52758800  | -0.39765300 |
| C | 2.22146200  | 0.11275000  | 3.46423900  |
| H | 2.40234700  | 1.13413900  | 3.11765500  |
| C | 1.69252600  | 0.17650600  | 4.90267200  |
| H | 2.42235200  | 0.66753900  | 5.55502900  |
| H | 0.75017900  | 0.73087400  | 4.96042300  |
| H | 1.51141700  | -0.82915300 | 5.30025300  |
| C | 3.55467000  | -0.64224600 | 3.39473800  |
| H | 3.49443400  | -1.61491700 | 3.89675100  |
| H | 3.84143300  | -0.81321300 | 2.35500400  |
| H | 4.35380200  | -0.07026300 | 3.87357900  |
| C | -1.34410400 | 1.81692600  | 2.96447600  |
| C | -1.43791300 | 2.20629900  | 4.29370200  |
| C | -2.45413400 | 1.67668900  | 5.08126500  |
| H | -0.72070000 | 2.91632600  | 4.68922100  |
| C | -3.22557200 | 0.48137700  | 3.16158000  |
| C | -3.35902100 | 0.79307300  | 4.50673900  |
| H | -2.53891800 | 1.95475700  | 6.12661600  |

|    |             |             |             |
|----|-------------|-------------|-------------|
| H  | -3.91016400 | -0.19524700 | 2.67036500  |
| H  | -4.16924300 | 0.35081300  | 5.07429100  |
| N  | -2.24121300 | 0.98377600  | 2.40557400  |
| C  | -1.22538100 | 0.06322400  | -2.39117000 |
| C  | -3.33507400 | 0.96254700  | -2.32852100 |
| C  | -3.25854500 | 0.13741800  | -3.62009800 |
| C  | -1.72877300 | -0.01254900 | -3.81546200 |
| H  | -3.23804600 | 2.03488700  | -2.55031300 |
| H  | -3.71947000 | -0.84096000 | -3.45567000 |
| H  | -3.75698600 | 0.61824200  | -4.46274000 |
| H  | -1.41769500 | -0.94774900 | -4.28410400 |
| H  | -1.30250900 | 0.81799400  | -4.39175800 |
| N  | -2.14718600 | 0.52826400  | -1.60847000 |
| O  | -0.06648100 | -0.28623500 | -1.95878000 |
| C  | -4.51378500 | 0.82517400  | -1.36444800 |
| O  | -5.62986300 | 0.52183100  | -1.77405100 |
| O  | -4.21275000 | 1.08065700  | -0.12542300 |
| Pd | -2.19727600 | 0.63491800  | 0.33677600  |
| C  | 2.62419400  | 1.34747200  | 0.04673100  |
| O  | 3.61094100  | 1.17651800  | 0.75764900  |
| N  | 2.50686400  | 0.79403400  | -1.17621500 |
| H  | 1.59666400  | 0.75809400  | -1.62464900 |
| C  | 3.50921500  | -0.12602200 | -1.64046600 |
| H  | 4.50188500  | 0.32128500  | -1.56247600 |
| H  | 3.32246900  | -0.35513100 | -2.69272700 |
| C  | 3.47496400  | -1.43785500 | -0.87499600 |
| O  | 2.52797500  | -1.82656900 | -0.22273200 |
| O  | 4.60885600  | -2.10331000 | -1.02772200 |
| C  | 4.68991700  | -3.38688000 | -0.39116300 |
| H  | 5.69397100  | -3.74818800 | -0.60115300 |
| H  | 4.54247400  | -3.27615400 | 0.68560900  |
| H  | 3.93631600  | -4.05720900 | -0.81001200 |
| O  | 0.42768600  | 5.07223100  | -0.27817900 |
| H  | 0.08365300  | 4.71143900  | 0.56435400  |
| C  | -0.60499900 | 5.40916900  | -1.13645200 |
| H  | -1.31748100 | 6.12863800  | -0.70827300 |
| C  | -1.42392200 | 4.16950400  | -1.52187100 |
| F  | -1.96175800 | 3.64518700  | -0.40807700 |
| F  | -2.42375900 | 4.45340800  | -2.36128100 |
| F  | -0.66941100 | 3.21451300  | -2.09218400 |
| C  | 0.03863000  | 6.08903300  | -2.34811200 |
| F  | -0.89477900 | 6.45006100  | -3.23925900 |
| F  | 0.68568600  | 7.18800400  | -1.95776300 |
| F  | 0.91005000  | 5.28456400  | -2.96245400 |



|   |             |             |             |
|---|-------------|-------------|-------------|
| O | -6.73652600 | -1.49251800 | -0.30486400 |
| H | -6.54240300 | -0.72993300 | -0.89167700 |
| C | -5.83149200 | -1.42410500 | 0.74098400  |
| H | -5.39003700 | -0.42416800 | 0.84070200  |
| C | -4.66467700 | -2.38681300 | 0.48886900  |
| F | -4.06295100 | -2.07943200 | -0.67442500 |
| F | -3.71984000 | -2.28009700 | 1.45327000  |
| F | -5.03457200 | -3.66309200 | 0.42923200  |
| C | -6.57140700 | -1.72028800 | 2.04385900  |
| F | -5.72309600 | -1.67105100 | 3.10194700  |
| F | -7.51178800 | -0.79634300 | 2.25182100  |
| F | -7.15089600 | -2.91930500 | 2.05530000  |
| O | 6.09531100  | 0.89767600  | 1.91844900  |
| H | 5.21512000  | 1.22708300  | 1.66822400  |
| C | 6.42232300  | -0.09148000 | 1.00335100  |
| H | 5.54072800  | -0.56809800 | 0.56515900  |
| C | 7.18130000  | -1.19699600 | 1.73506400  |
| F | 6.37063200  | -1.78856000 | 2.62642800  |
| F | 7.58726500  | -2.14820200 | 0.87578700  |
| F | 8.24878200  | -0.74151800 | 2.38567400  |
| C | 7.20958100  | 0.50663900  | -0.16912800 |
| F | 7.42364800  | -0.39901600 | -1.13435500 |
| F | 6.48530700  | 1.50365800  | -0.71163100 |
| F | 8.38572800  | 1.00972000  | 0.20240100  |
| O | 1.19560900  | -4.12347700 | -0.99711800 |
| H | 1.64307900  | -3.43962600 | -0.46766100 |
| C | 0.50027300  | -3.46119600 | -2.00459900 |
| H | 0.33712100  | -2.40132900 | -1.78209800 |
| C | -0.88660500 | -4.09458400 | -2.16826600 |
| F | -1.47910700 | -4.23185900 | -0.97522800 |
| F | -1.67158800 | -3.30040800 | -2.92011800 |
| F | -0.84742400 | -5.29678400 | -2.74310600 |
| C | 1.30404800  | -3.49801100 | -3.30796300 |
| F | 0.64405400  | -2.89586700 | -4.30901900 |
| F | 2.46607800  | -2.83073300 | -3.13626500 |
| F | 1.61385300  | -4.73278800 | -3.69317000 |

## 4. X-Ray Data of 3hb

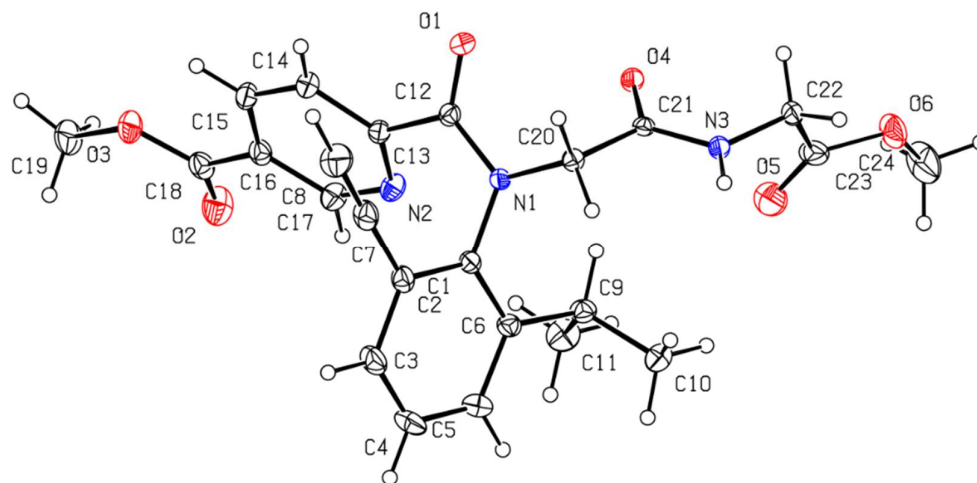

Bond precision: C-C = 0.0025 Å      Wavelength=1.54178

Cell:                    a=9.3386(3)      b=10.3729(3)      c=24.4089(7)  
                           alpha=90            beta=90            gamma=90

Temperature:        170 K

|                        | Calculated    | Reported      |
|------------------------|---------------|---------------|
| Volume                 | 2364.45(12)   | 2364.45(12)   |
| Space group            | P 21 21 21    | P 21 21 21    |
| Hall group             | P 2ac 2ab     | P 2ac 2ab     |
| Moiety formula         | C24 H25 N3 O6 | C24 H25 N3 O6 |
| Sum formula            | C24 H25 N3 O6 | C24 H25 N3 O6 |
| Mr                     | 451.47        | 451.47        |
| Dx, g cm <sup>-3</sup> | 1.268         | 1.268         |
| Z                      | 4             | 4             |
| Mu (mm <sup>-1</sup> ) | 0.764         | 0.764         |
| F000                   | 952.0         | 952.0         |
| F000'                  | 955.13        |               |
| h, k, lmax             | 11, 12, 29    | 11, 12, 29    |
| Nref                   | 4335 [ 2484 ] | 4334          |
| Tmin, Tmax             | 0.746, 0.892  | 0.676, 0.753  |
| Tmin'                  | 0.742         |               |

Correction method= # Reported T Limits: Tmin=0.676 Tmax=0.753  
 AbsCorr = MULTI-SCAN

Data completeness= 1.74/1.00      Theta(max)= 68.241

R(reflections)= 0.0287( 4312)      wR2(reflections)= 0.0734( 4334)

S = 1.071      Npar= 322

## 5. References

- 1) (a) Cao, H.; Liu, H.; Dömling, A. Efficient Multicomponent Reaction Synthesis of the Schistosomiasis Drug Praziquantel. *Chem. Eur. J.* **2010**, *16*, 12296. (b) Benckekroun, M.; Pachón-Angona, I.; Luzet, V.; Martin, H.; Oset-Gasque, M.-J.; Marco-Contelles, J.; Ismaili, L. Synthesis, antioxidant and  $\text{A}\beta$  anti-aggregation properties of new ferulic, caffeic and lipoic acid derivatives obtained by the Ugi four-component reaction. *Bioorg. Chem.* **2019**, *85*, 221.
- 2) (a) Yao, Q.-J.; Zhang, S.; Zhan, B.-B.; Shi, B.-F. Atroposelective Synthesis of Axially Chiral Biaryls by Palladium-Catalyzed Asymmetric C–H Olefination Enabled by a Transient Chiral Auxiliary. *Angew. Chem. Int. Ed.* **2017**, *56*, 6617. (b) Liao, G.; Yao, Q.-J.; Zhang, Z.-Z.; Wu, Y.-J.; Huang, D.-Y.; Shi, B.-F. Scalable, Stereocontrolled Formal Syntheses of (+)-Isoschizandrin and (+)-Steganone: Development and Applications of Palladium(II)-Catalyzed Atroposelective C–H Alkynylation. *Angew. Chem. Int. Ed.* **2018**, *57*, 3661. (c) Liao, G.; Li, B.; Chen, H.-M.; Yao, Q.-J.; Xia, Y.-N.; Luo, J.; Shi, B.-F. Pd-Catalyzed Atroposelective C–H Allylation through  $\beta$ -O Elimination: Diverse Synthesis of Axially Chiral Biaryls. *Angew. Chem. Int. Ed.* **2018**, *57*, 17151. (d) Zhang, S.; Yao, Q.-J.; Liao, G.; Li, X.; Li, H.; Chen, H.-M.; Hong, X.; Shi, B.-F. Enantioselective Synthesis of Atropisomers Featuring Pentatomic Heteroaromatics by Pd-Catalyzed C–H Alkynylation. *ACS Catal.* **2019**, *9*, 1956. (e) Luo, J.; Zhang, T.; Wang, L.; Liao, G.; Yao, Q.-J.; Wu, Y.-J.; Zhan, B.-B.; Lan, Y.; Lin, X.-F.; Shi, B.-F. Enantioselective Synthesis of Biaryl Atropisomers by Pd-Catalyzed C–H Olefination using Chiral Spiro Phosphoric Acid Ligands. *Angew. Chem. Int. Ed.* **2019**, *58*, 6708. (f) Liao, G.; Chen, H.-M.; Xia, Y.-N.; Li, B.; Yao, Q.-J.; Shi, B.-F. Synthesis of Chiral Aldehyde Catalysts by Pd-Catalyzed Atroposelective C–H Naphthylation. *Angew. Chem. Int. Ed.* **2019**, *58*, 11464. (g) Zhan, B.-B.; Wang, L.; Luo, J.; Lin, X.-F.; Shi, B.-F. Synthesis of Axially Chiral Biaryl-2-amines by Pd<sup>II</sup>-Catalyzed Free-Amine-Directed Atroposelective C–H Olefination. *Angew. Chem. Int. Ed.* **2020**, *59*, 3568. (h) Yao, Q.-J.; Xie, P.-P.; Wu, Y.-J.; Feng, Y.-L.; Teng, M.-Y.; Hong, X.; Shi, B.-F. Enantioselective Synthesis of Atropisomeric Anilides via Pd(II)-Catalyzed Asymmetric C–H Olefination. *J. Am. Chem. Soc.* **2020**, *142*, 18266.
- 3) Frisch, M. J.; Trucks, G. W.; Schlegel, H. B.; Scuseria, G. E.; Robb, M. A.; Cheeseman, J. R.; Scalmani, G.; Barone, V.; Mennucci, B.; Petersson, G. A.; Nakatsuji, H.; Caricato, M.; Li, X.; Hratchian, H. P.; Izmaylov, A. F.; Bloino, J.; Zheng, G.; Sonnenberg, J. L.; Hada, M.; Ehara, M.; Toyota, K.; Fukuda, R.; Hasegawa, J.; Ishida, M.; Nakajima, T.; Honda, Y.; Kitao, O.; Nakai, H.; Vreven, T.; Montgomery, J. A., Jr.; Peralta, J. E.; Ogliaro, F.; Bearpark, M.; Heyd, J. J.; Brothers, E.; Kudin, K. N.; Staroverov, V. N.; Kobayashi, R.; Normand, J.; Raghavachari, K.; Rendell, A.; Burant, J. C.; Iyengar, S. S.; Tomasi, J.; Cossi, M.; Rega, N.; Millam, J. M.; Klene, M.; Knox, J. E.; Cross, J. B.; Bakken, V.; Adamo, C.; Jaramillo, J.; Gomperts, R.; Stratmann, R. E.; Yazyev, O.; Austin, A. J.; Cammi, R.; Pomelli, C.; Ochterski, J. W.; Martin, R. L.; Morokuma, K.; Zakrzewski, V. G.; Voth, G. A.; Salvador, P.; Dannenberg, J. J.; Dapprich, S.; Daniels, A. D.; Farkas, O.; Foresman, J. B.; Ortiz, J. V.; Cioslowski, J.; Fox, D. J.; *Gaussian 09*, revision D.01; Gaussian Inc.: Wallingford, CT, 2013.
- 4) Chai, J.-D.; Head-Gordon, M. Long-Range Corrected Hybrid Density Functionals with Damped Atom-Atom Dispersion Corrections. *Phys. Chem. Chem. Phys.* **2008**, *10*, 6615.
- 5) Hay, P. J.; Wadt, W. R. Ab Initio Effective Core Potentials for Molecular Calculations. Potentials for K to Au Including the Outermost Core Orbitals. *J. Chem. Phys.* **1985**, *82*, 299.

- 6) Yu, H. S.; He, X.; Truhlar, D. G. MN15-L: A New Local Exchange-Correlation Functional for Kohn-Sham Density Functional Theory with Broad Accuracy for Atoms, Molecules, and Solids. *J. Chem. Theory Comput.* **2016**, *12*, 1280.
- 7) Weigend, F.; Ahlrichs, R. Balanced Basis Sets of Split Valence, Triple Zeta Valence and Quadruple Zeta Valence Quality for H to Rn: Design and Assessment of Accuracy. *Phys. Chem. Chem. Phys.* **2005**, *7*, 3297.
- 8) Weigend, F. Accurate Coulomb-Fitting Basis Sets for H to Rn. *Phys. Chem. Chem. Phys.* **2006**, *8*, 1057.
- 9) Marenich, A. V.; Cramer, C. J.; Truhlar, D. G. Universal Solvation Model Based on Solute Electron Density and on a Continuum Model of the Solvent Defined by the Bulk Dielectric Constant and Atomic Surface Tensions. *J. Phys. Chem. B* **2009**, *113*, 6378.
- 10) Xiang, Y.; Fan, X.; Pei-Jun Cai, P.-J.; Yu, Z.-X. Understanding Regioselectivities of Corey–Chaykovsky Reactions of Dimethylsulfoxonium Methylide (DMSOM) and Dimethylsulfonium Methylide (DMSM) toward Enones: A DFT Study. *Eur. J. Org. Chem.* **2019**, 582.
- 11) 20 CYLview, C. Y. Legault, Université de Sherbrooke, 2020 (<http://www.cylview.org>).

## 6. NMR Spectra

*rac-1a*

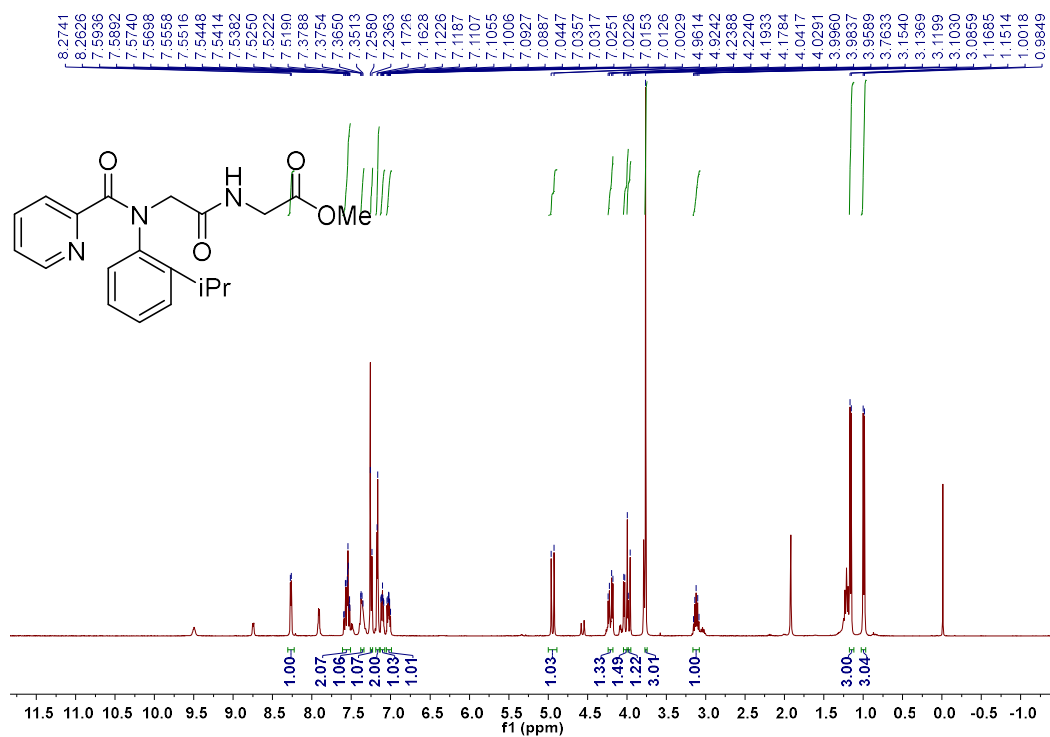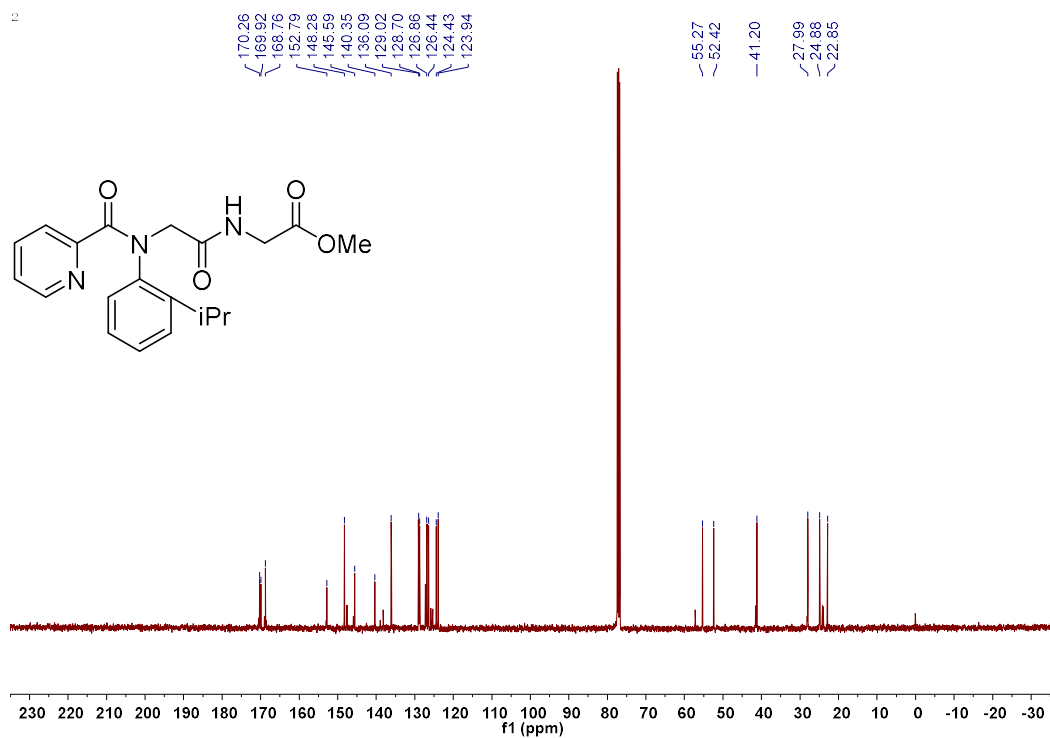

**rac-1b**

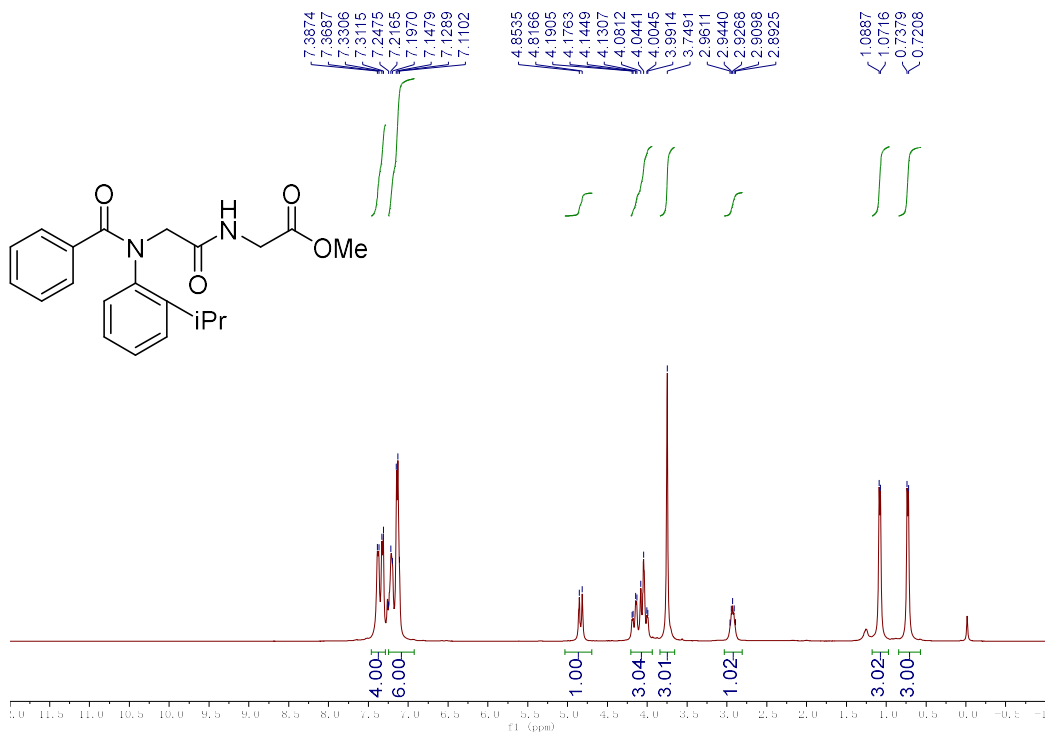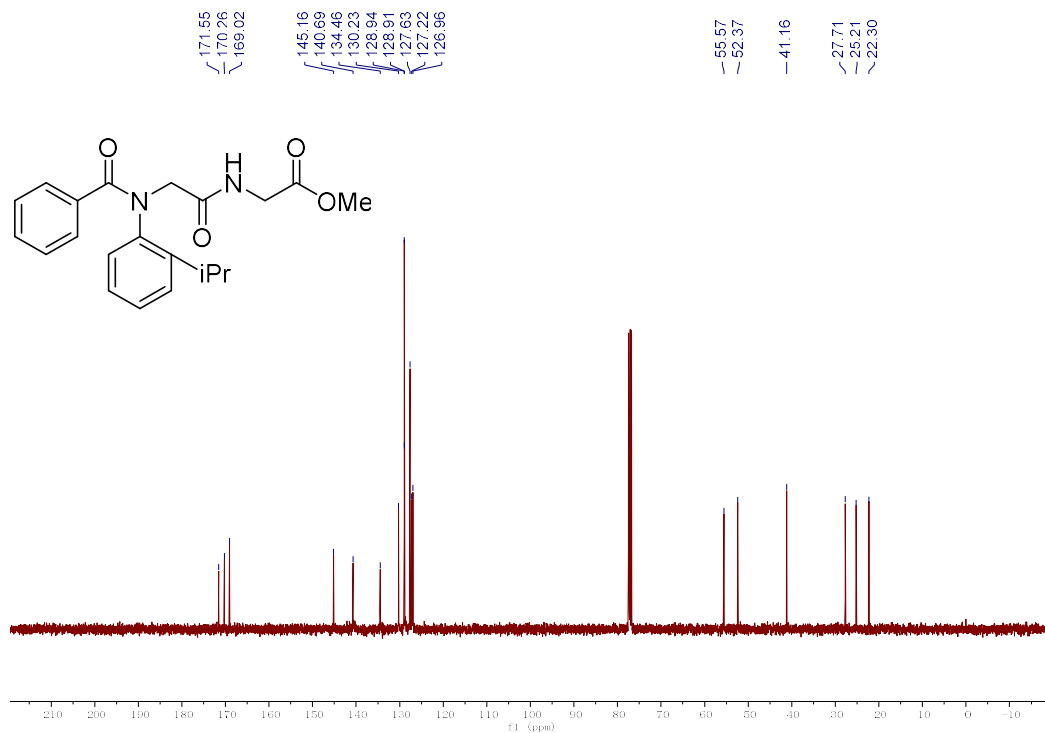

*rac-1c*

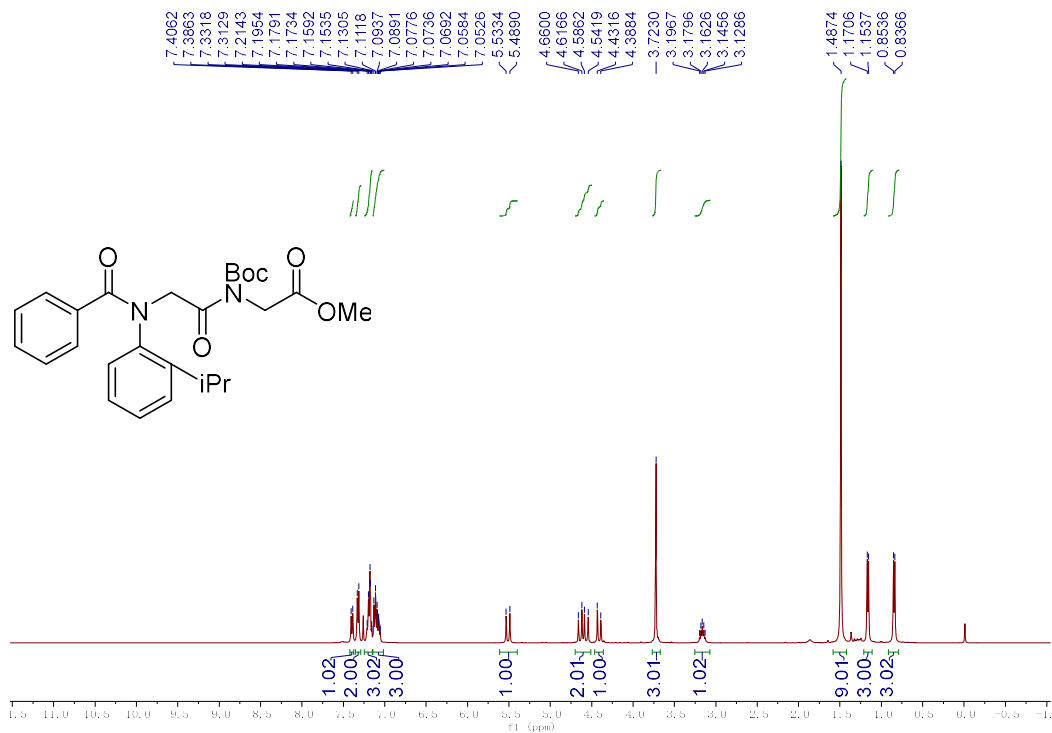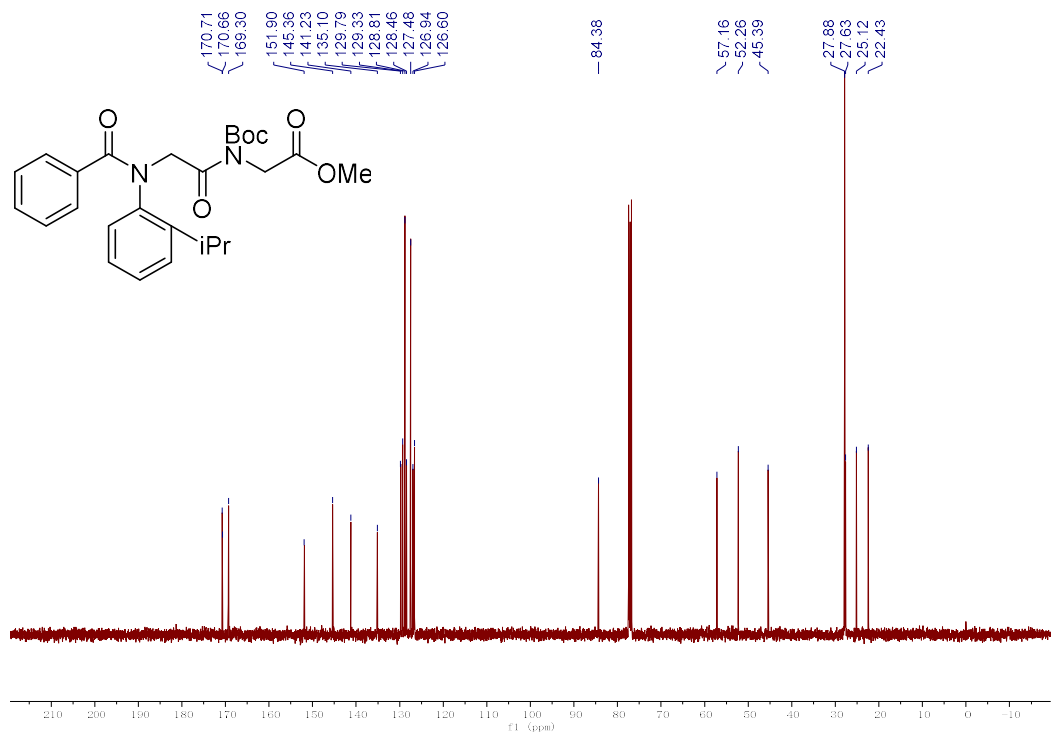

*rac-1d*

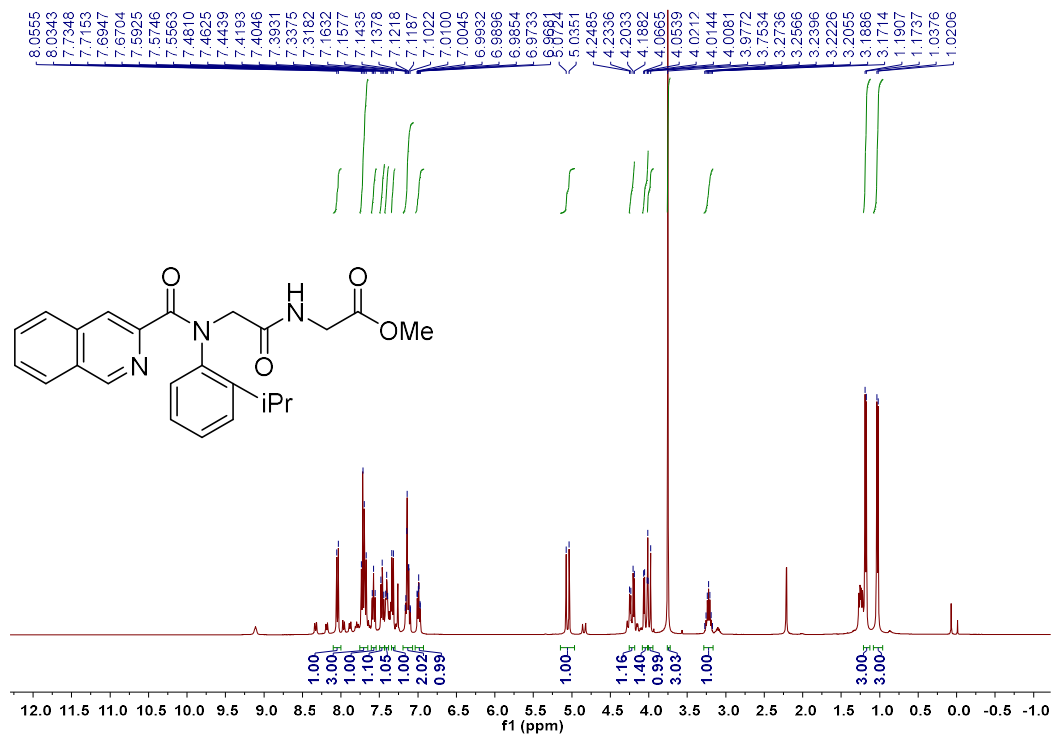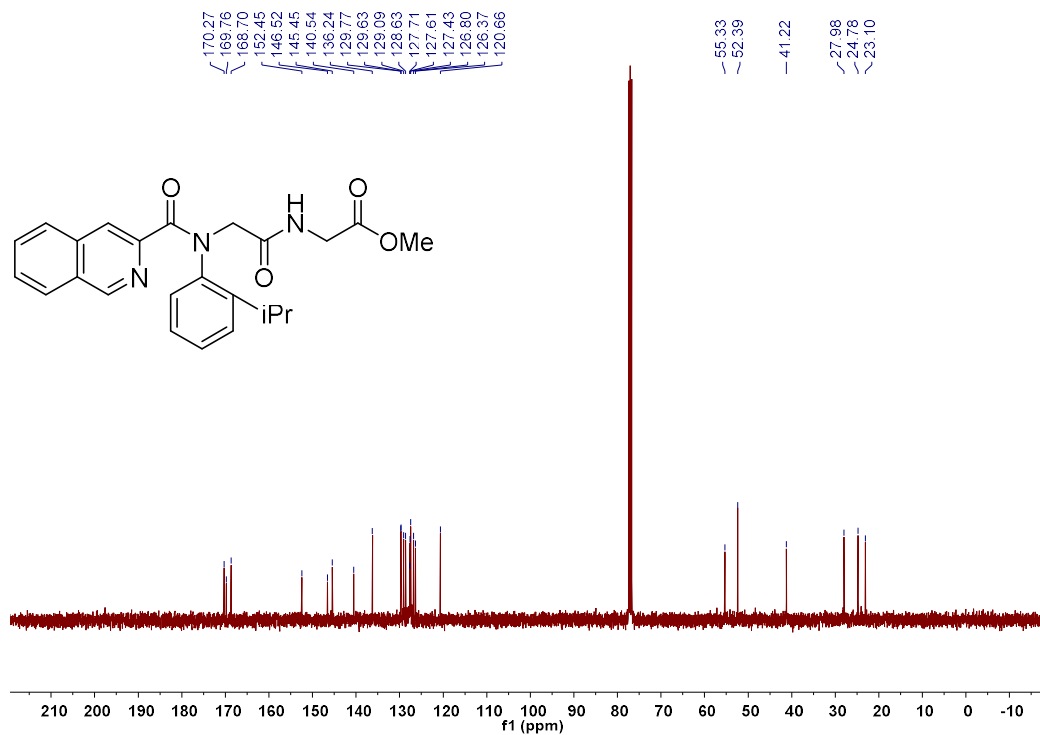



*rac-1e*

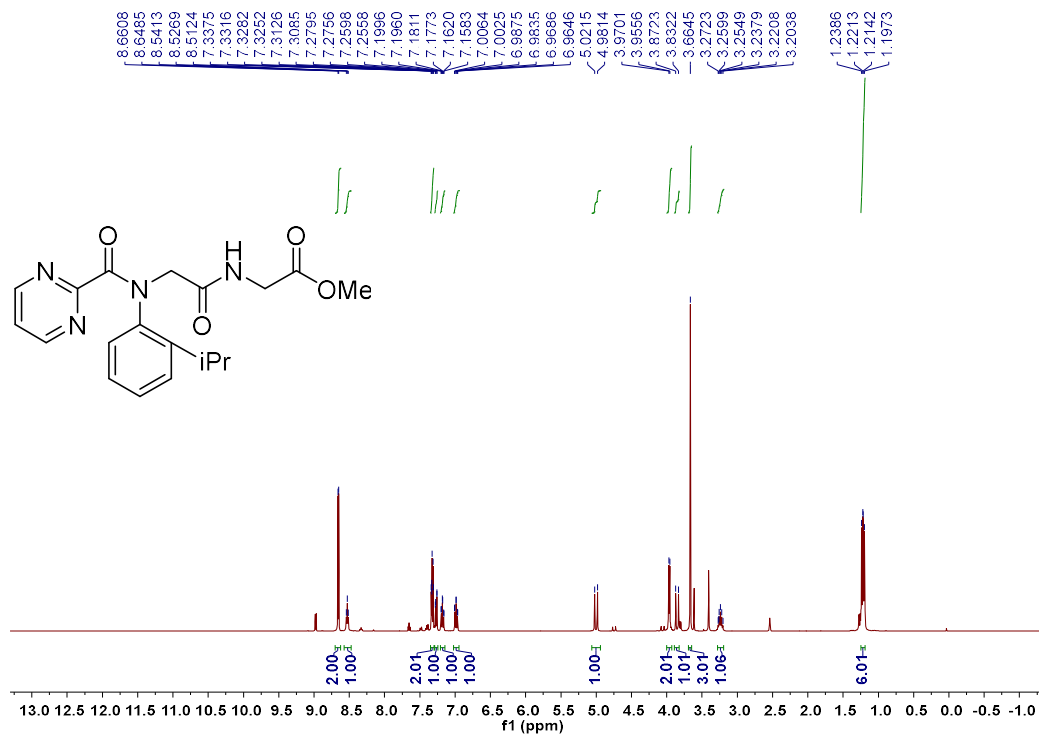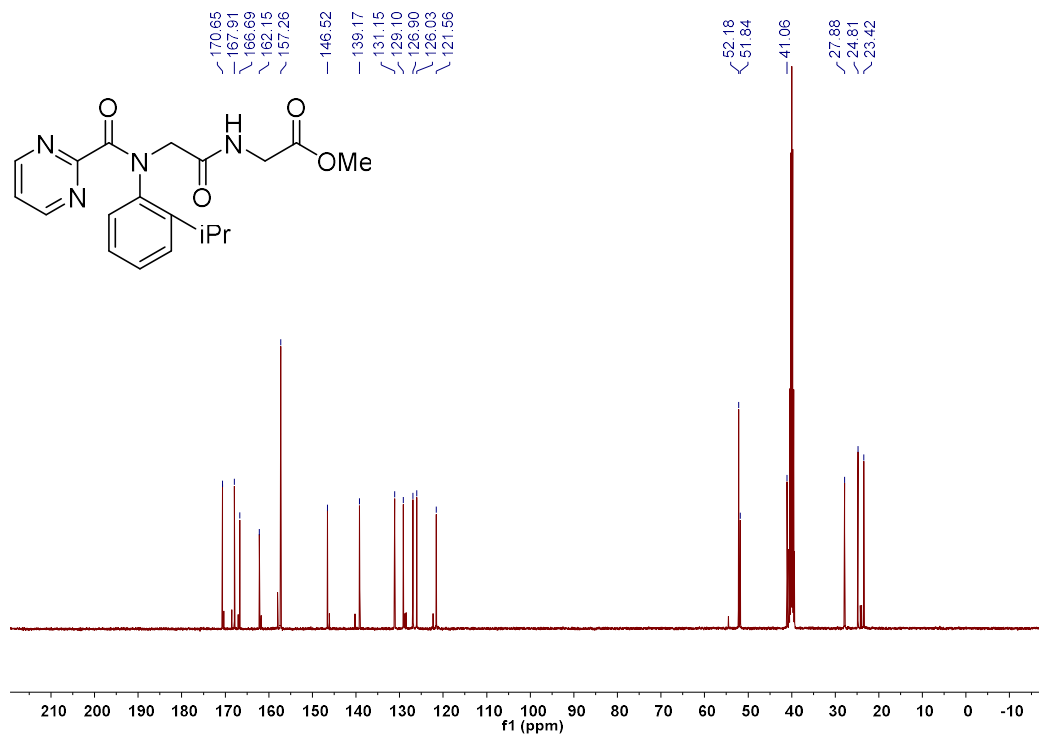

**rac-1f**

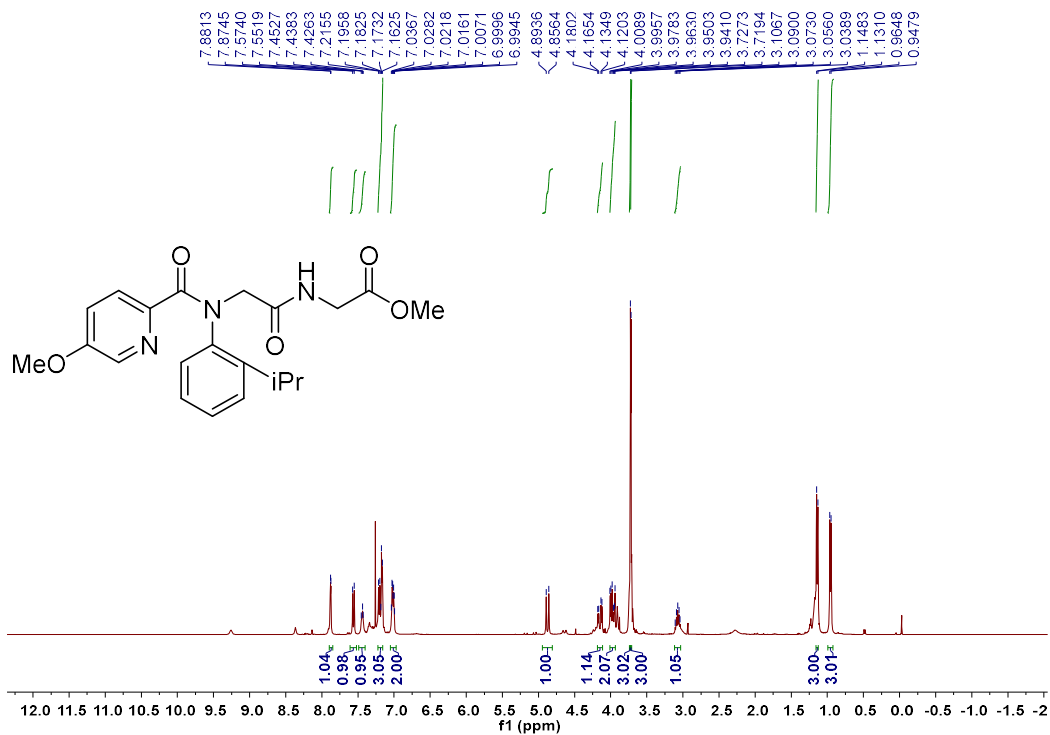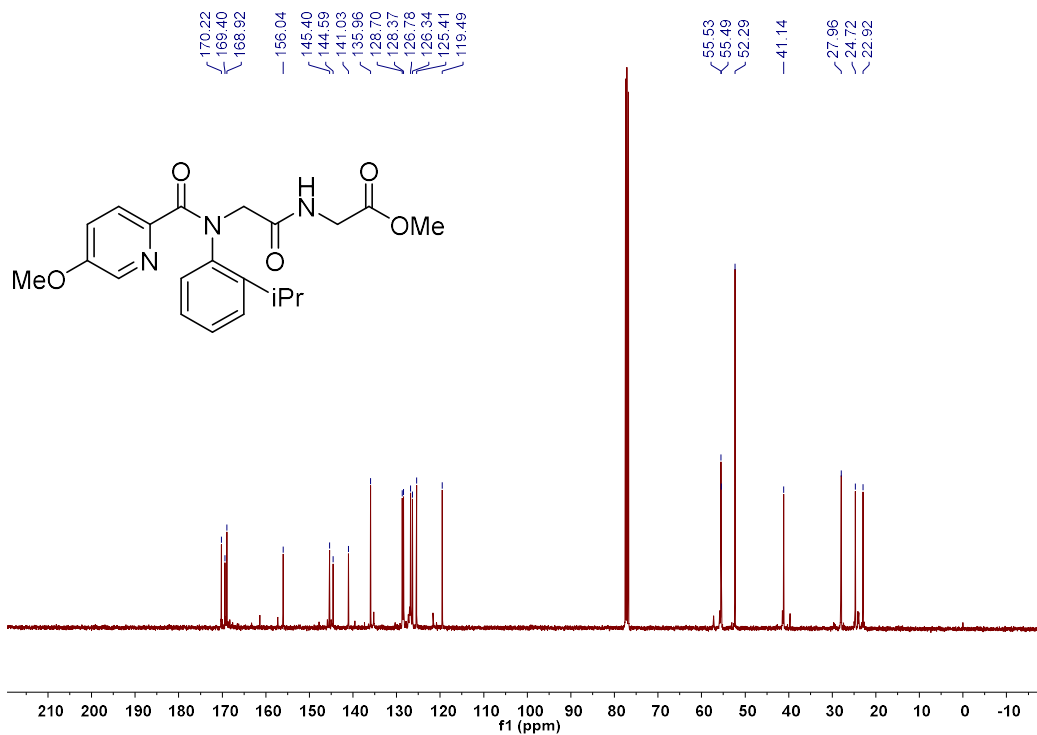

**rac-1g**

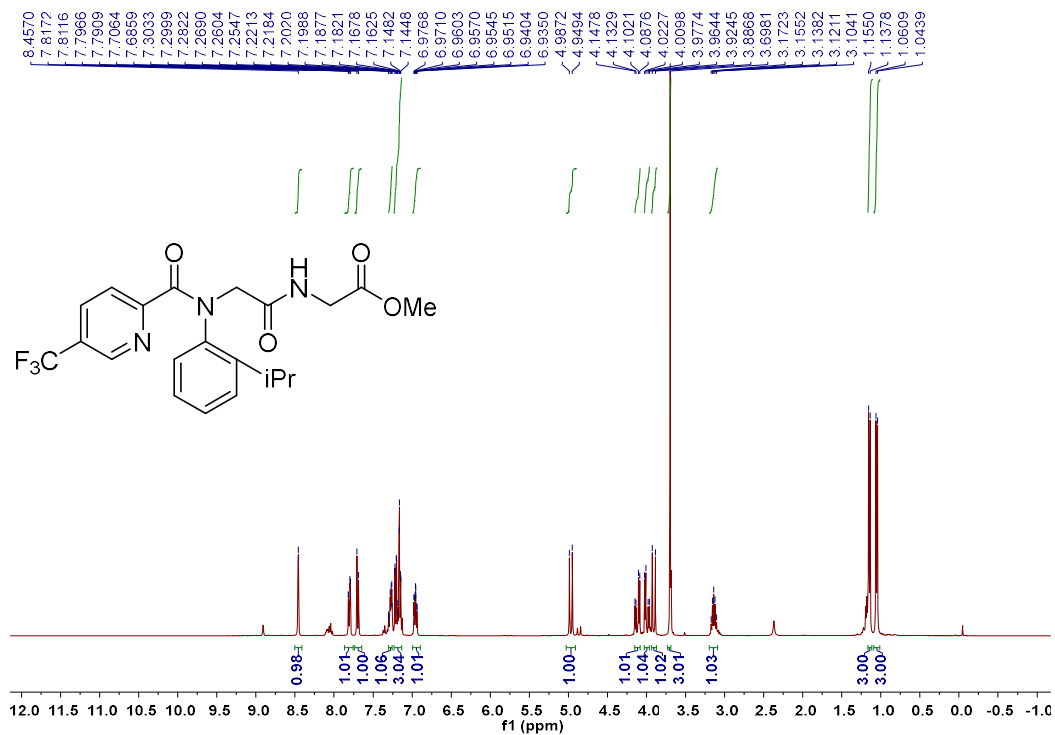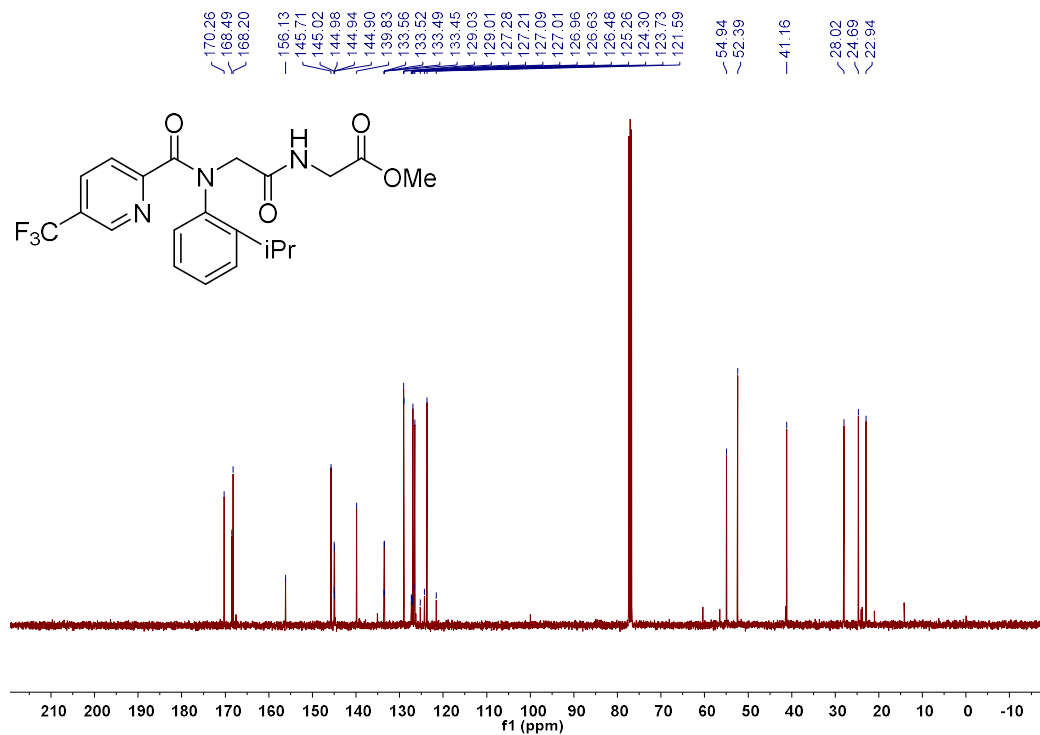

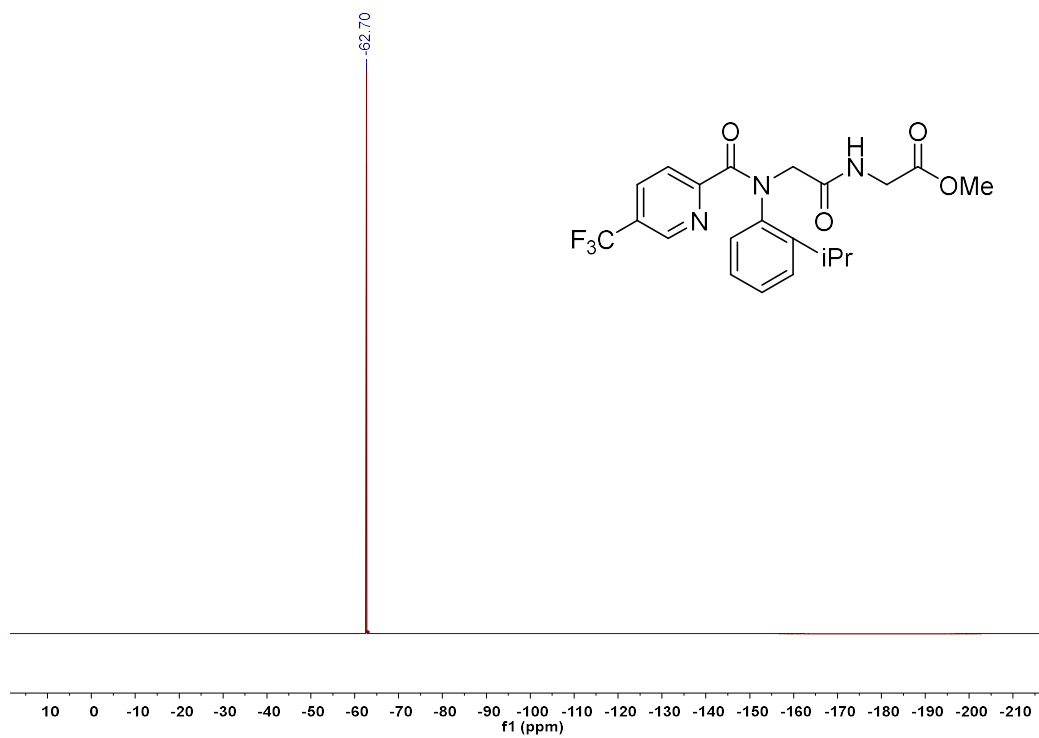

**rac-1h**

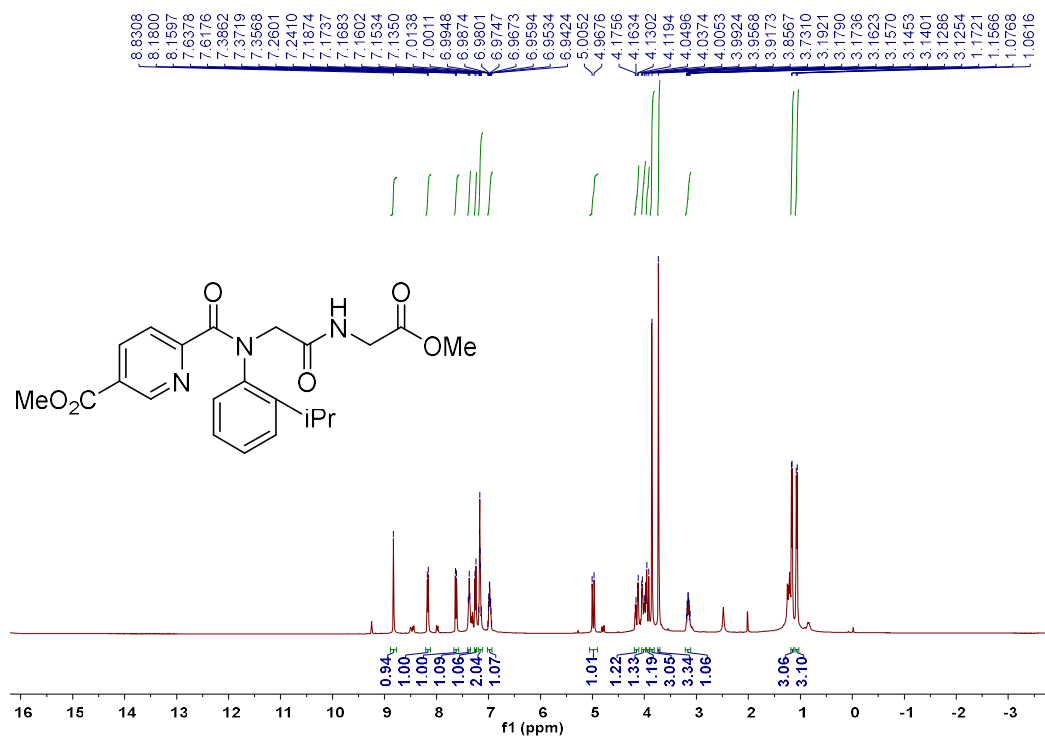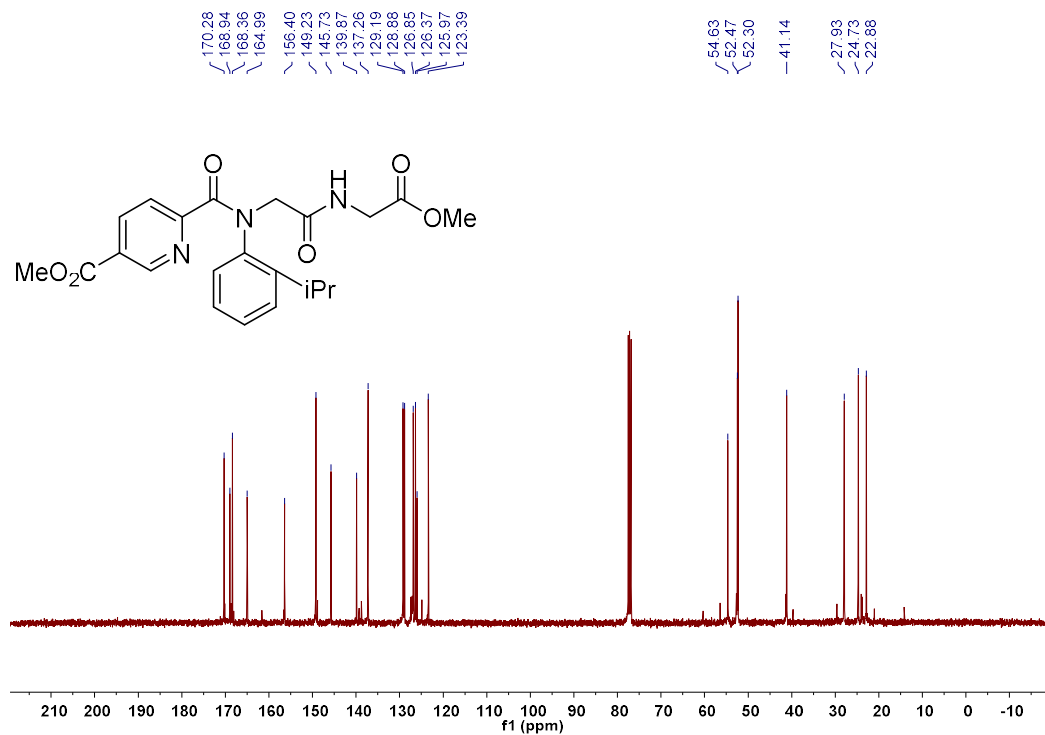

**rac-1i**

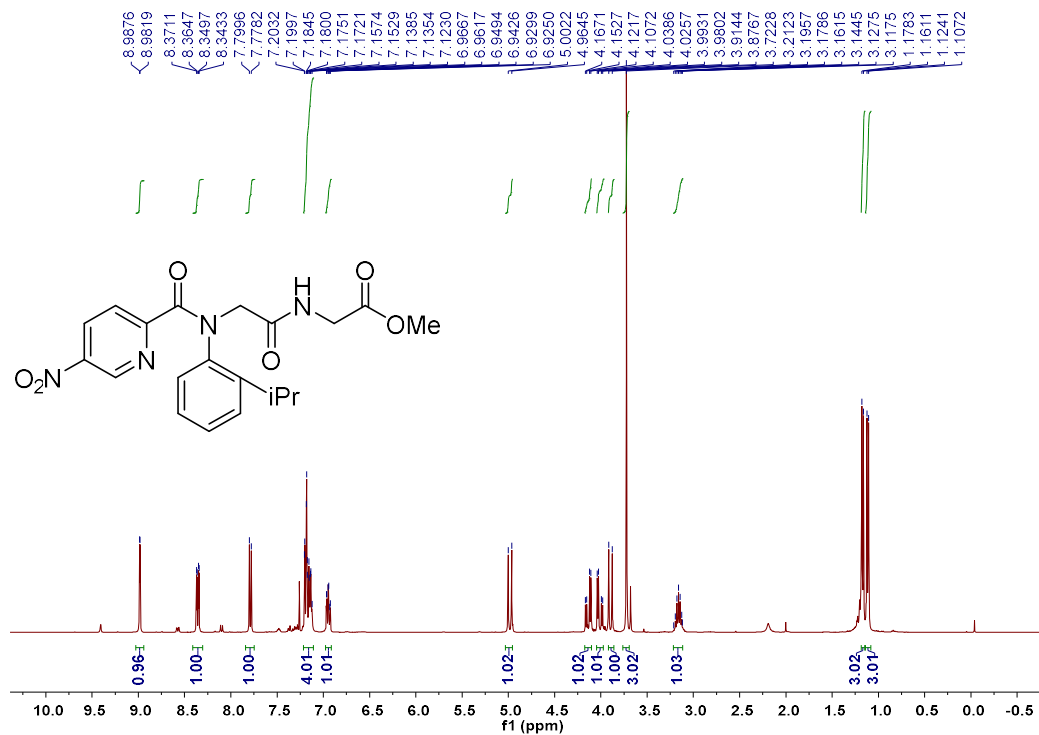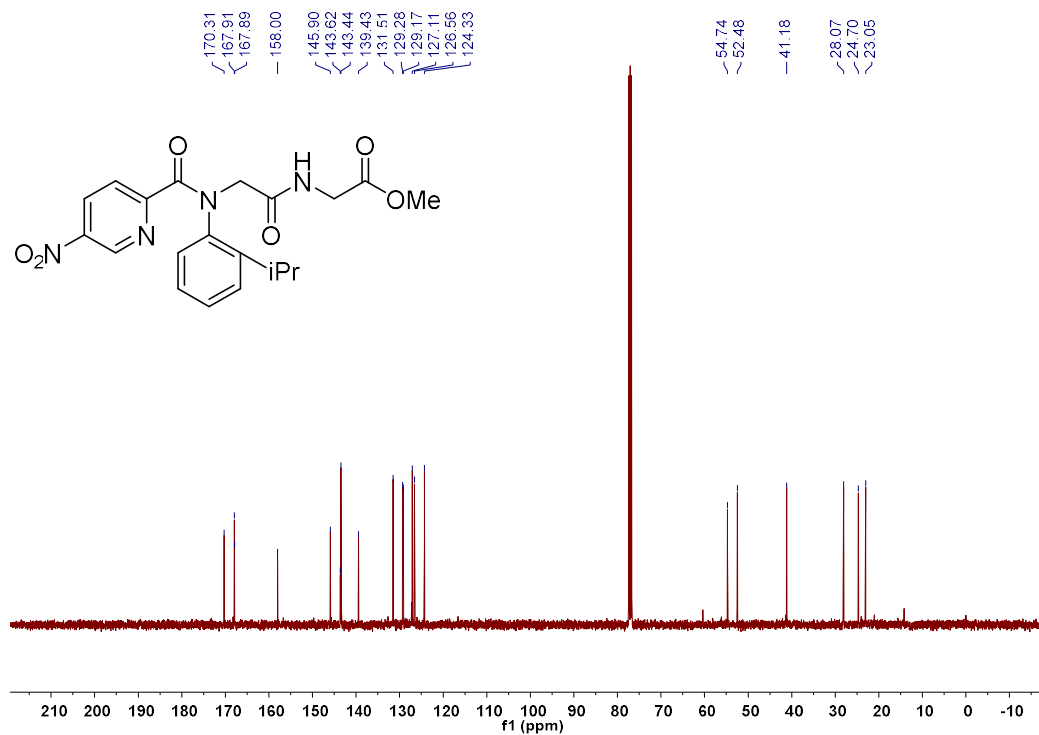

*rac-1j*

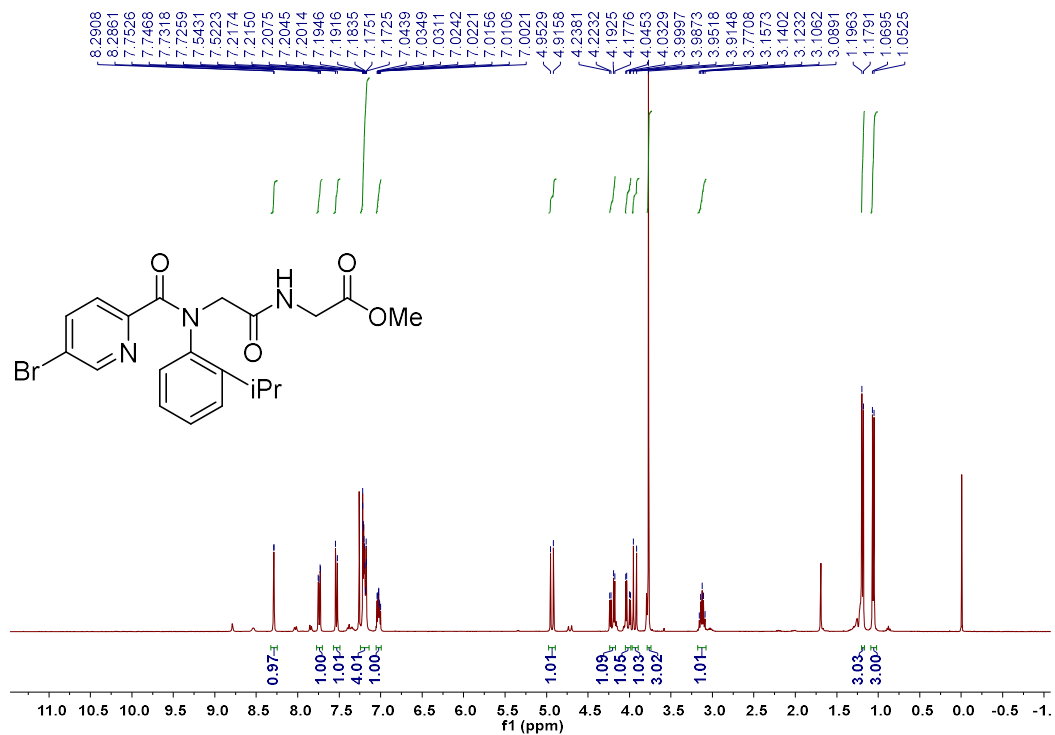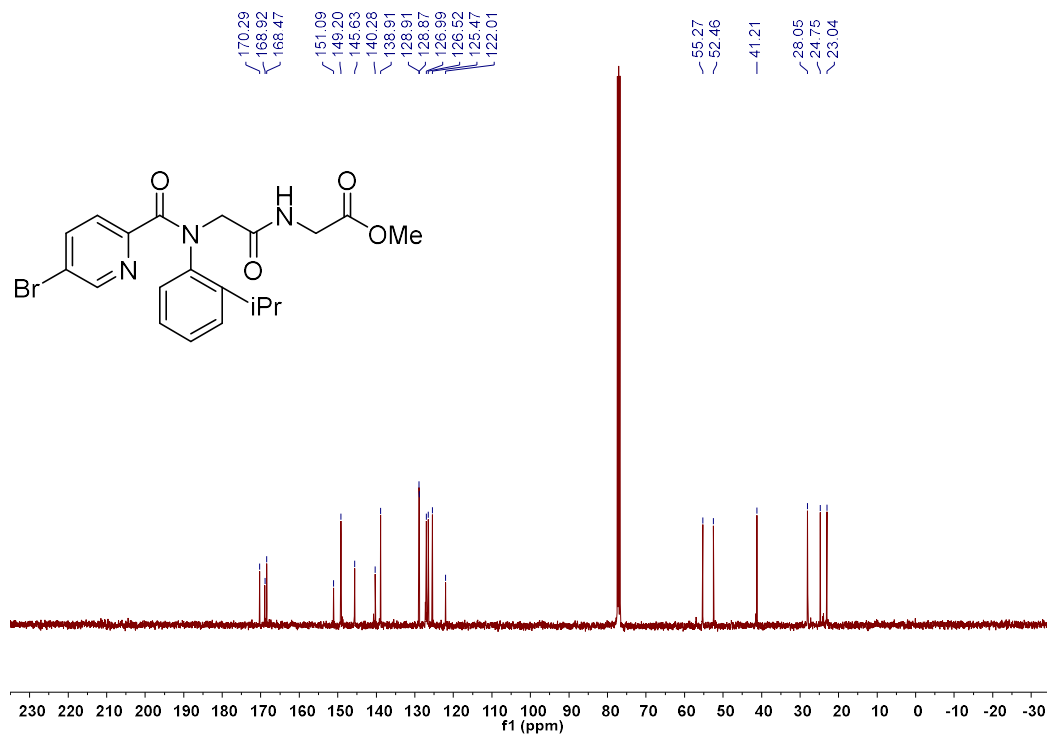

**rac-1k**

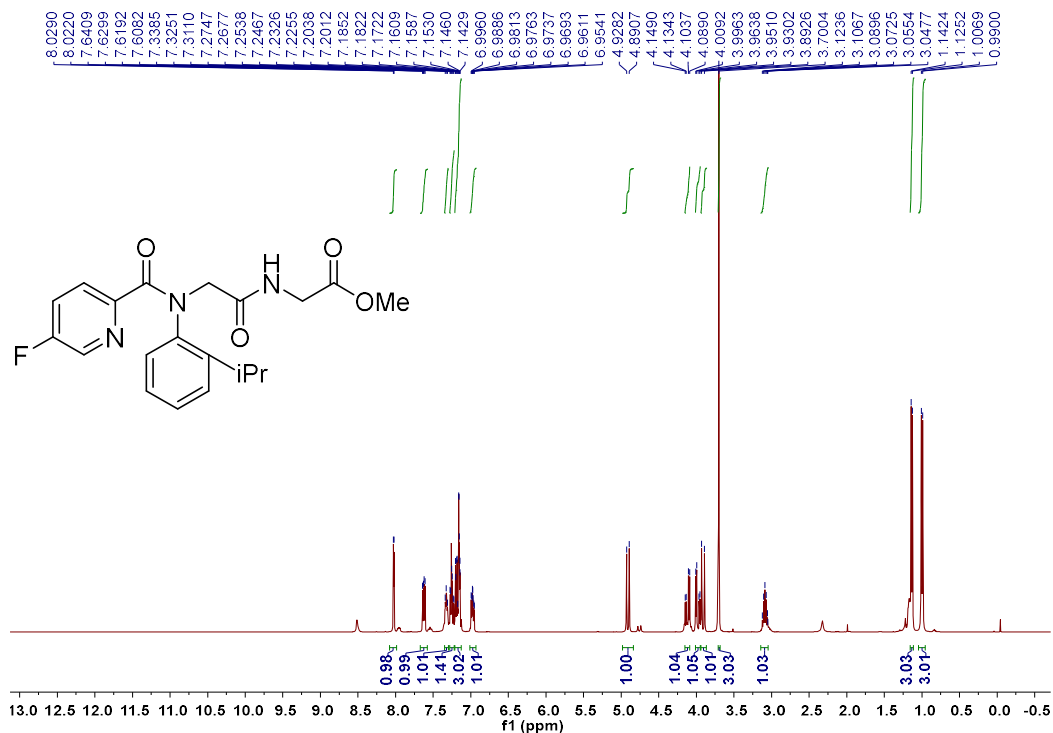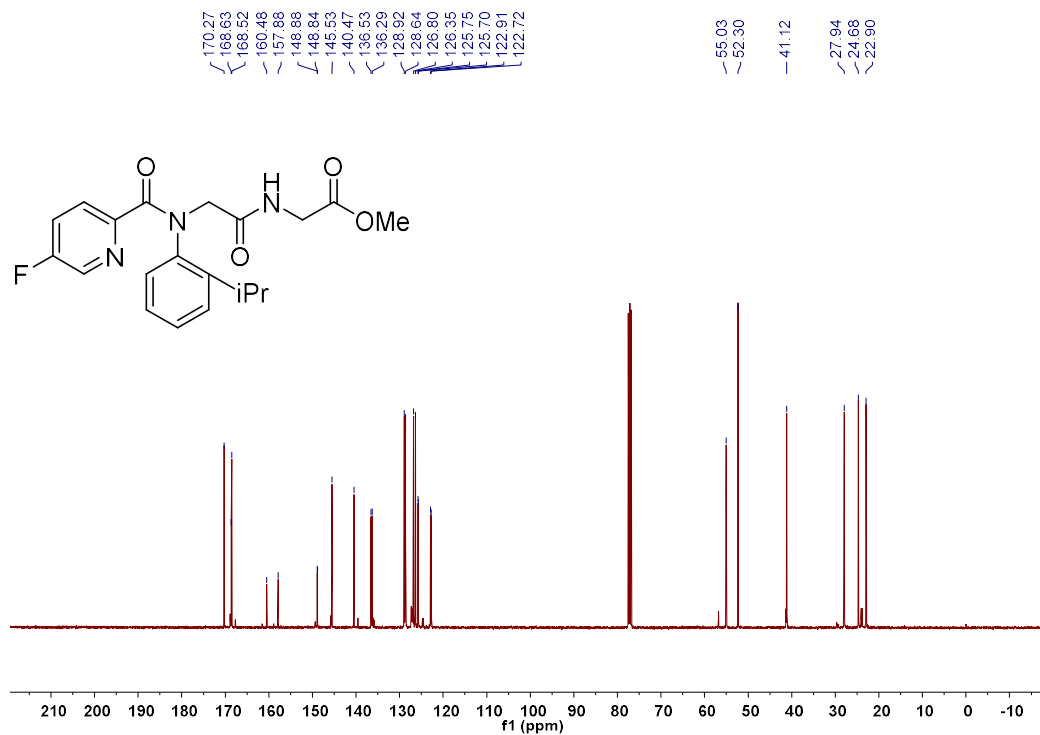



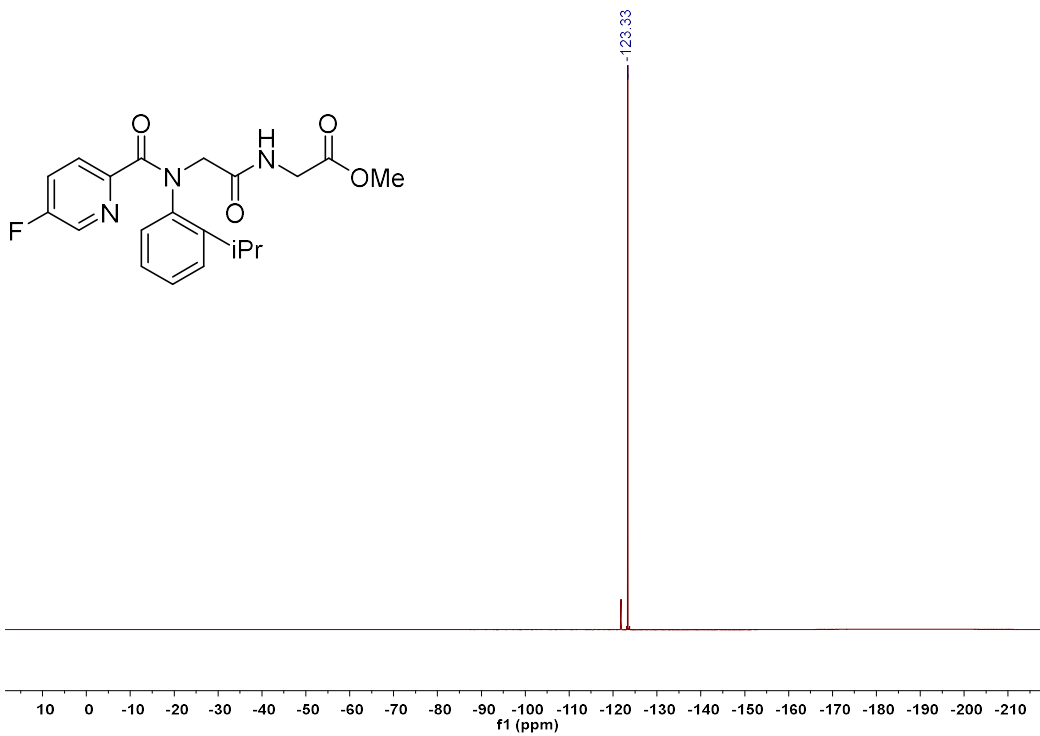

rac-11

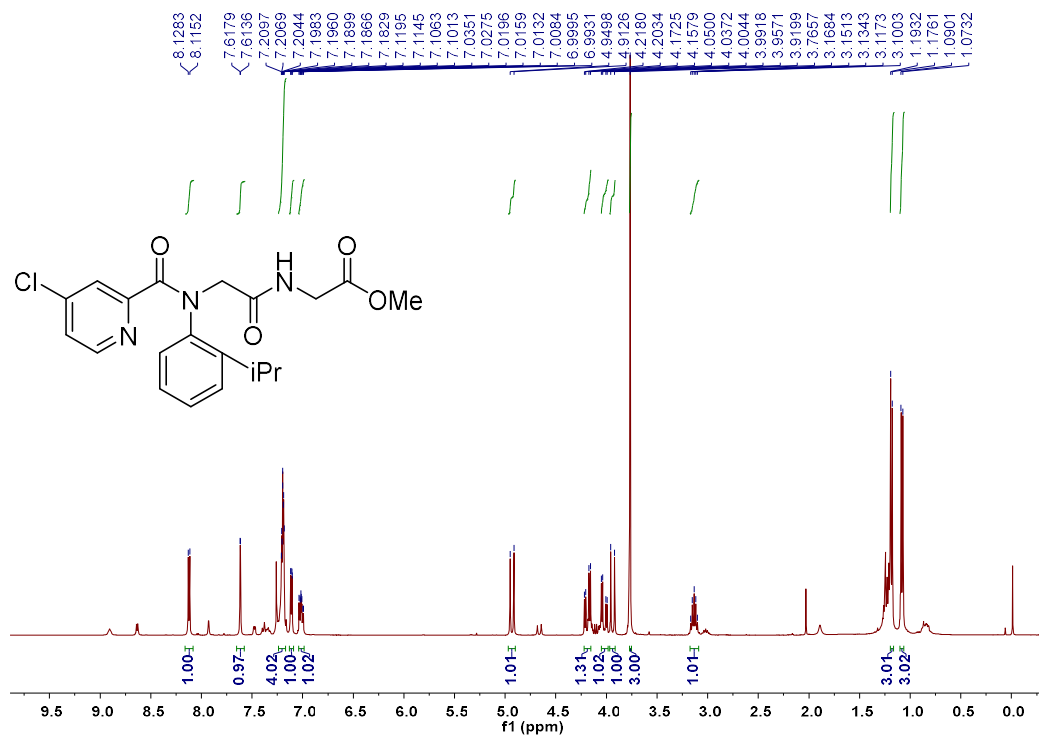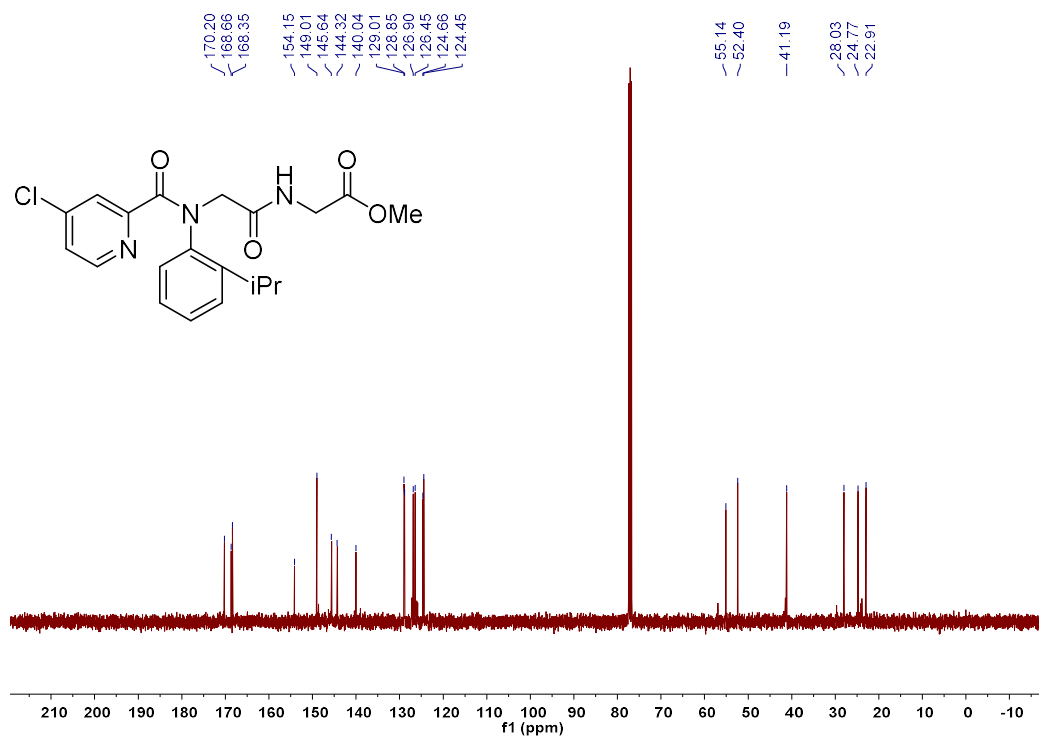

**rac-1m**

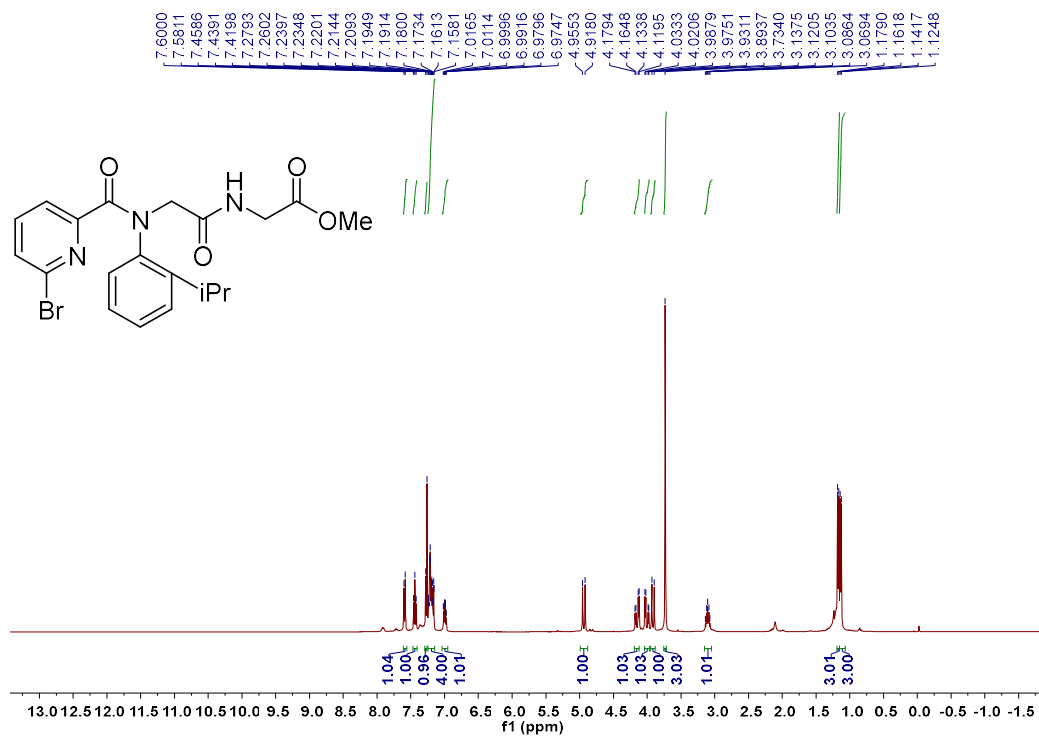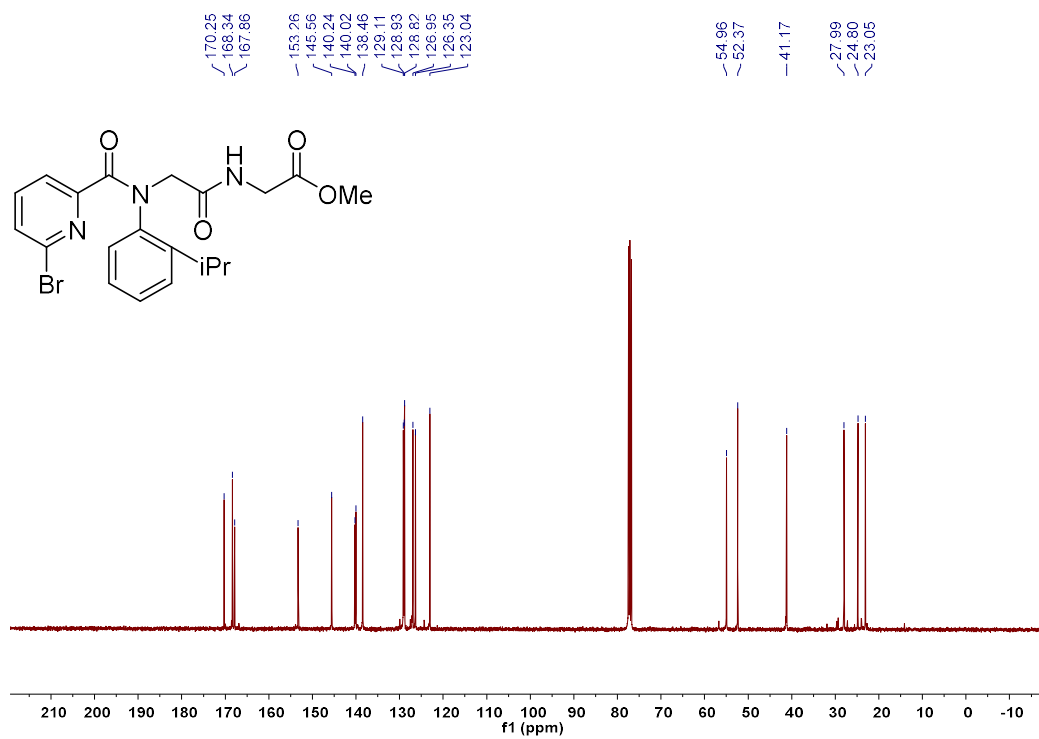

*rac-4a*

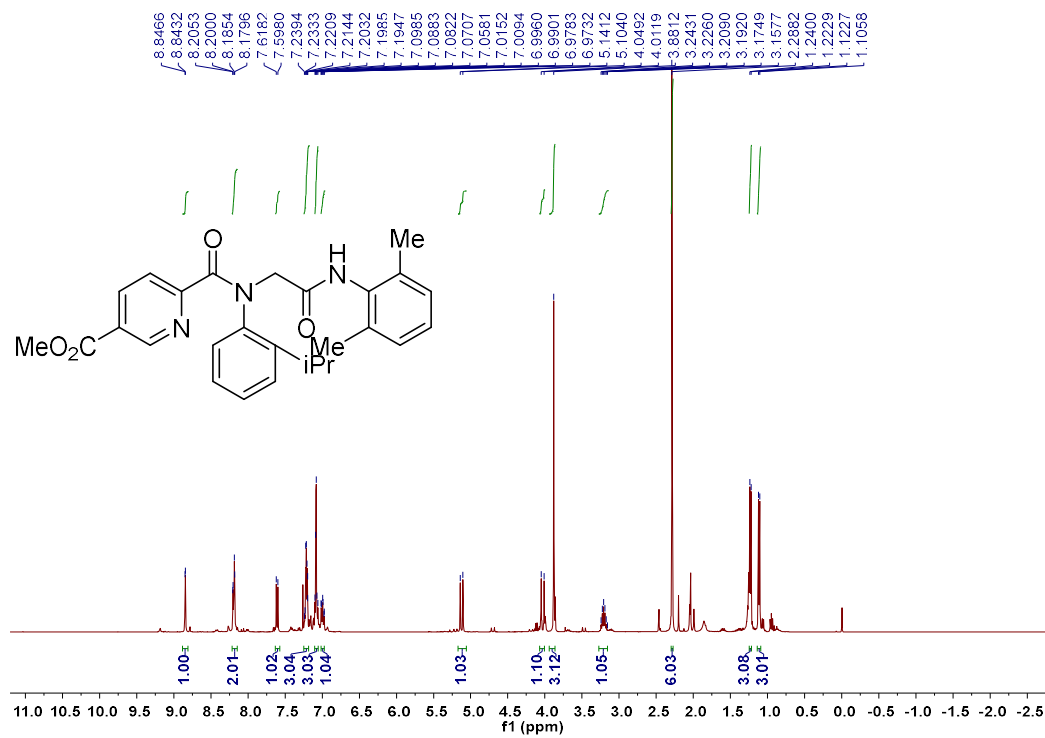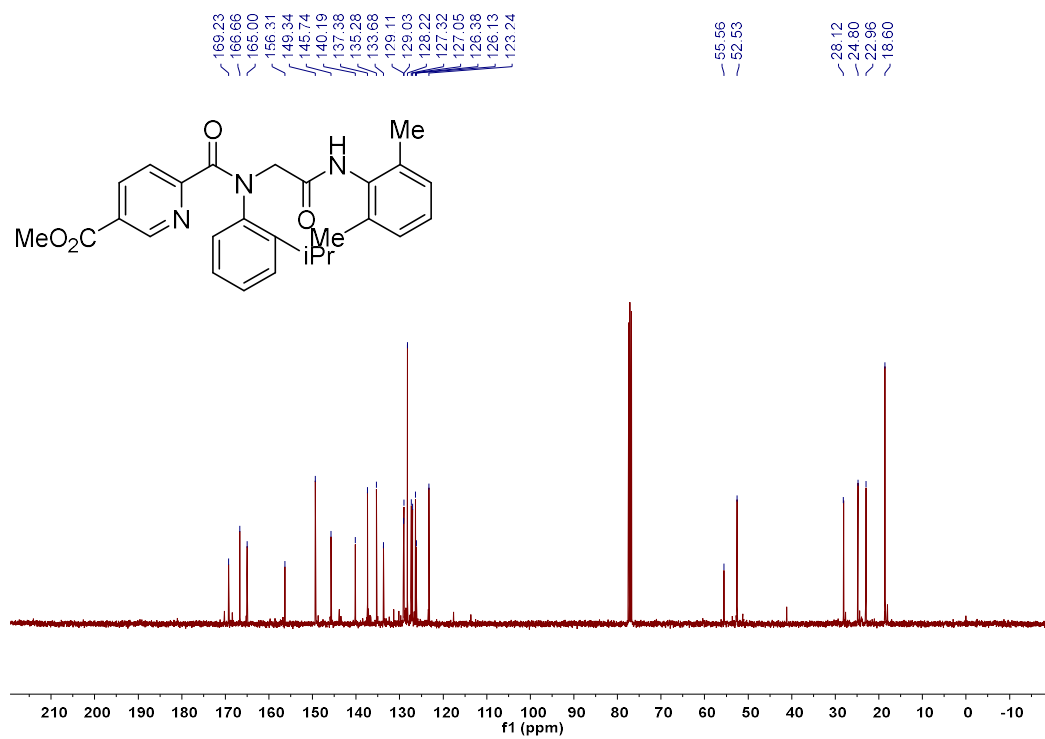

**rac-4b**

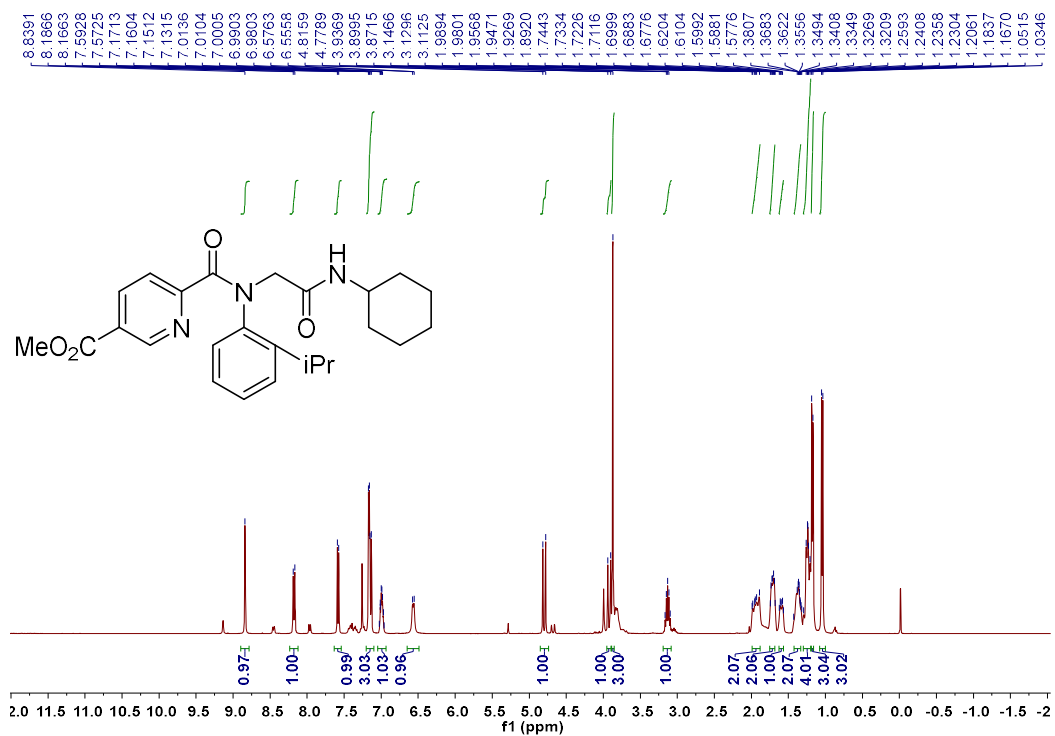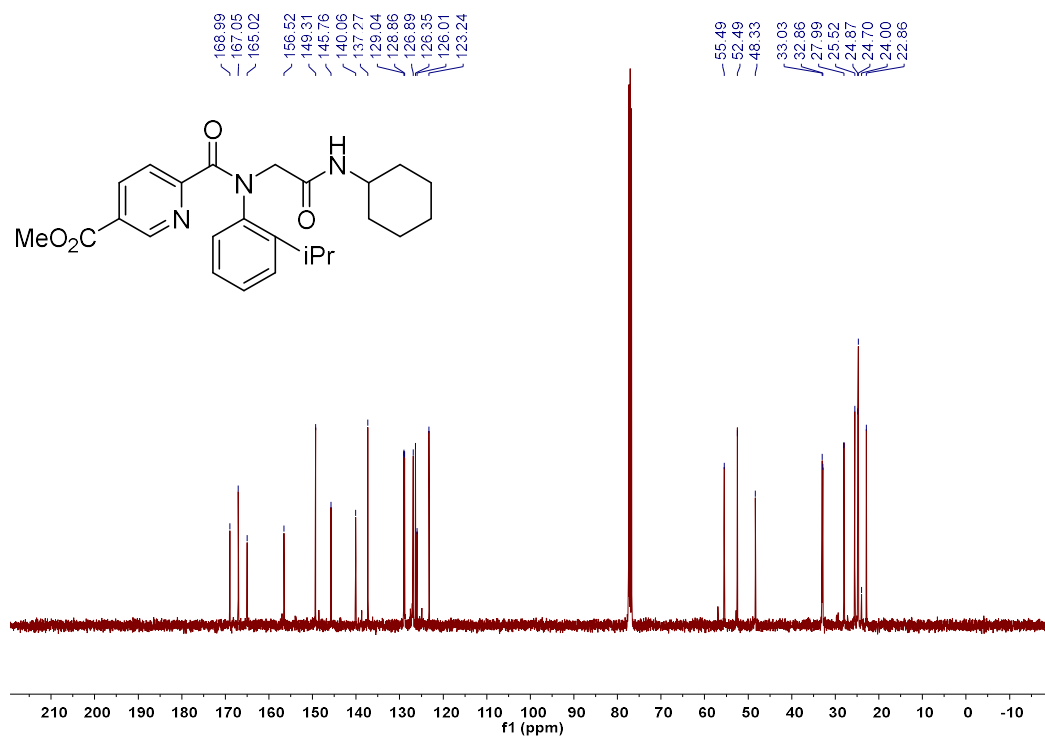

*rac-4c*

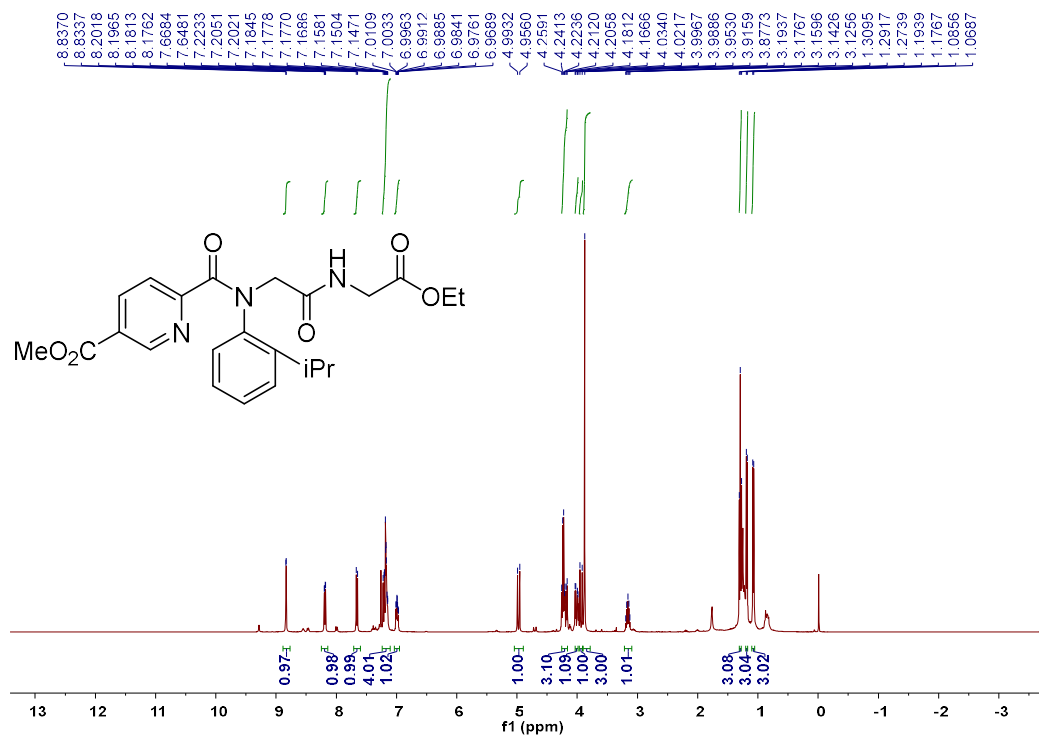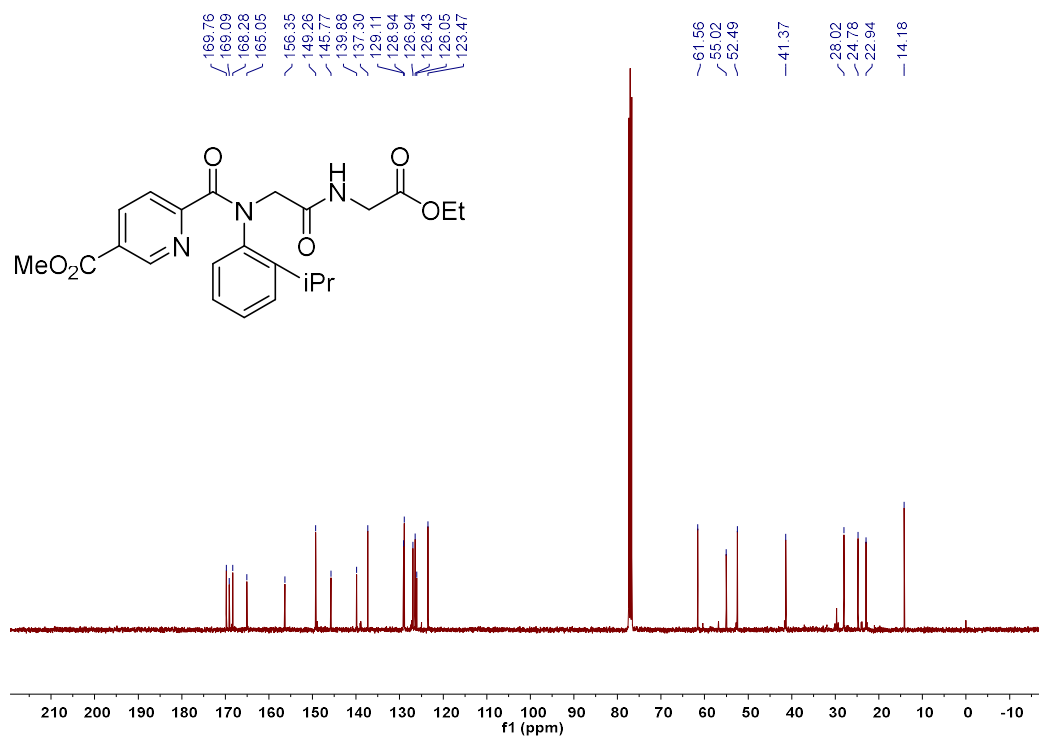

**rac-4d**

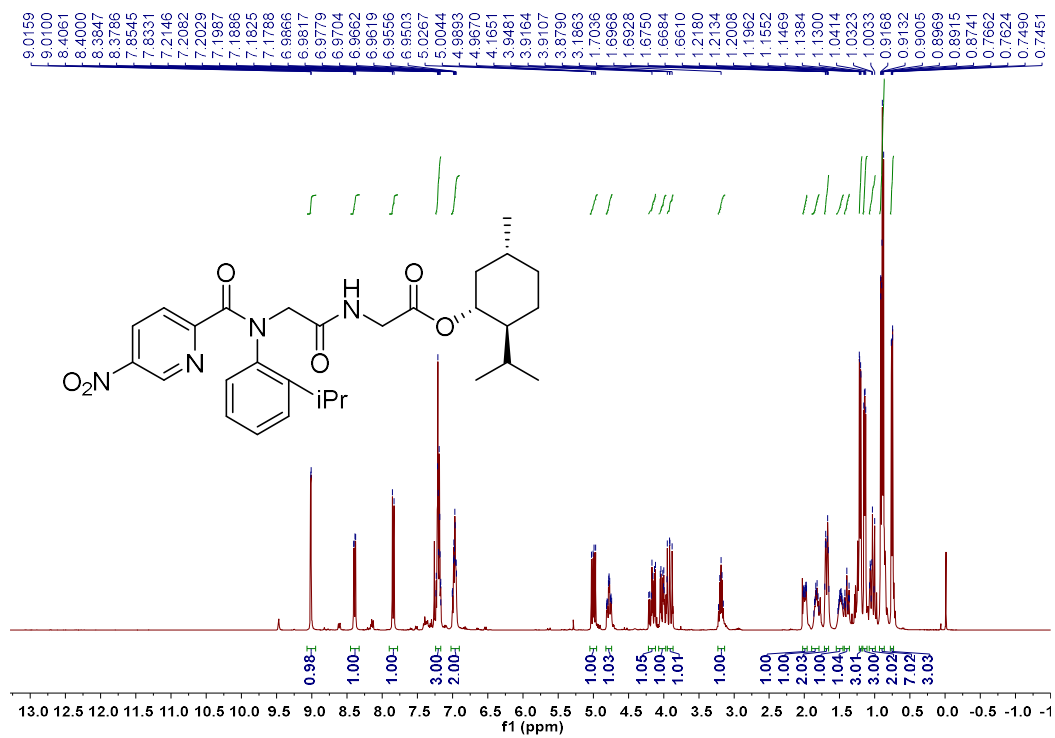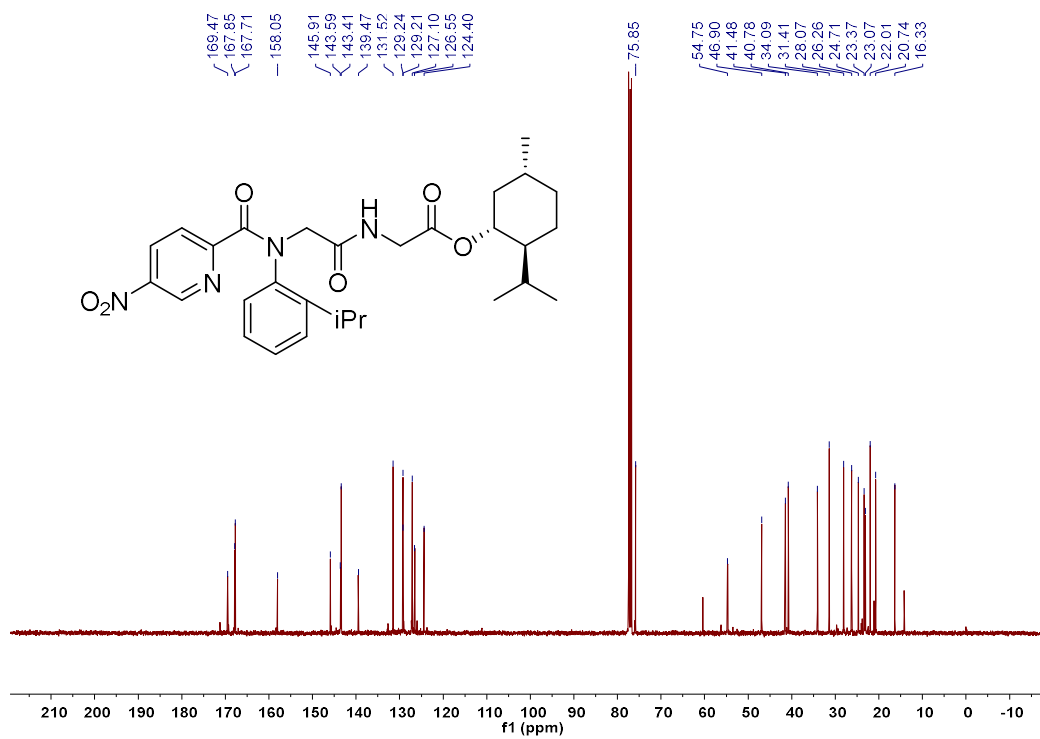

rac-4e

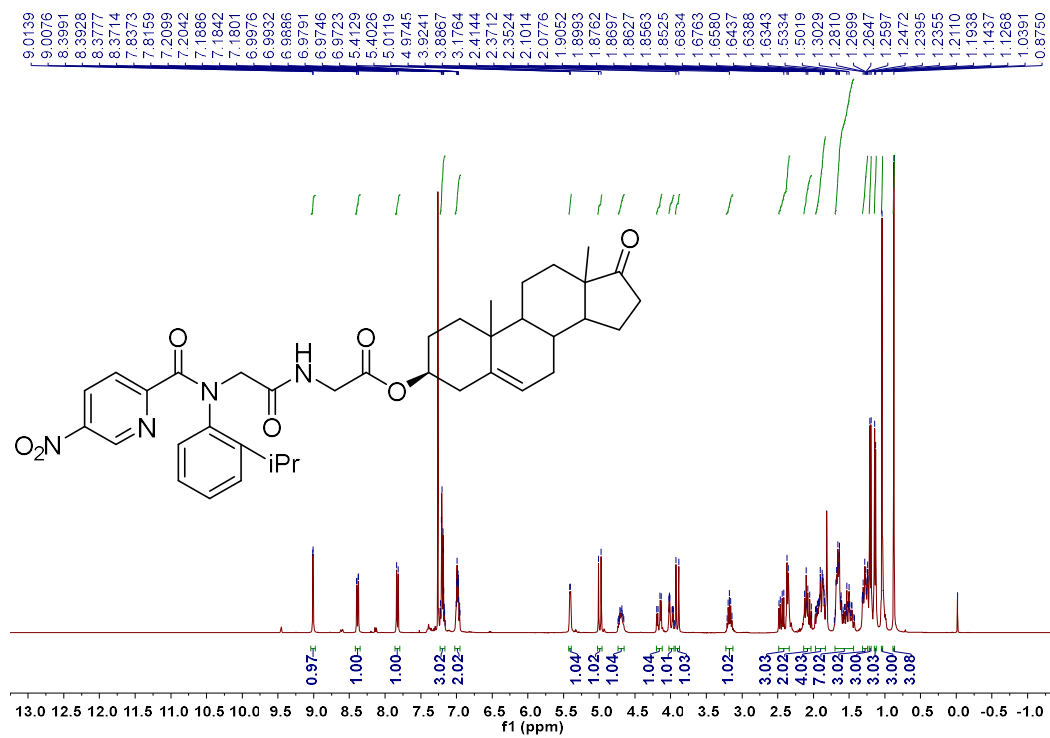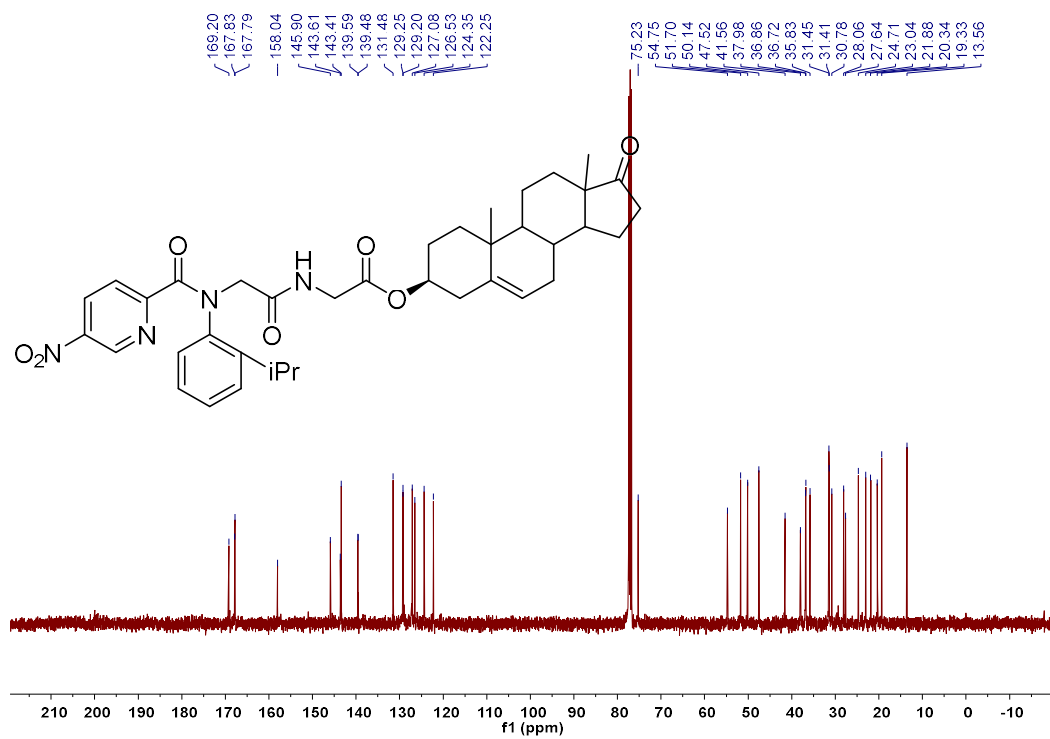



**rac-4f**

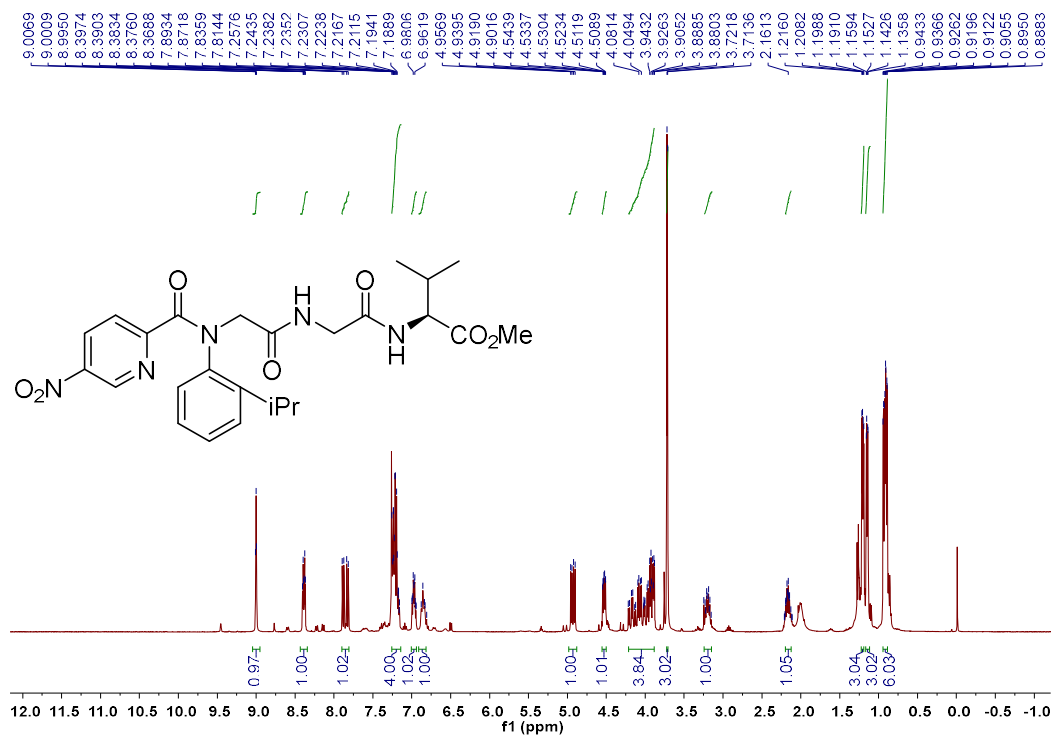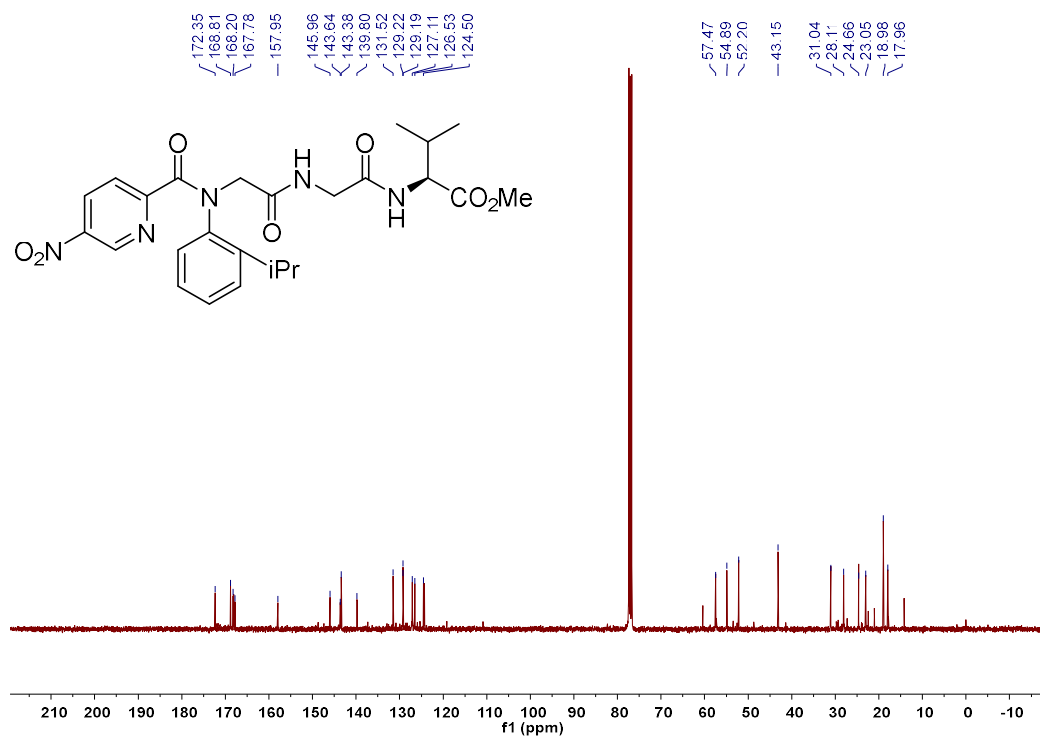

*rac-4g*

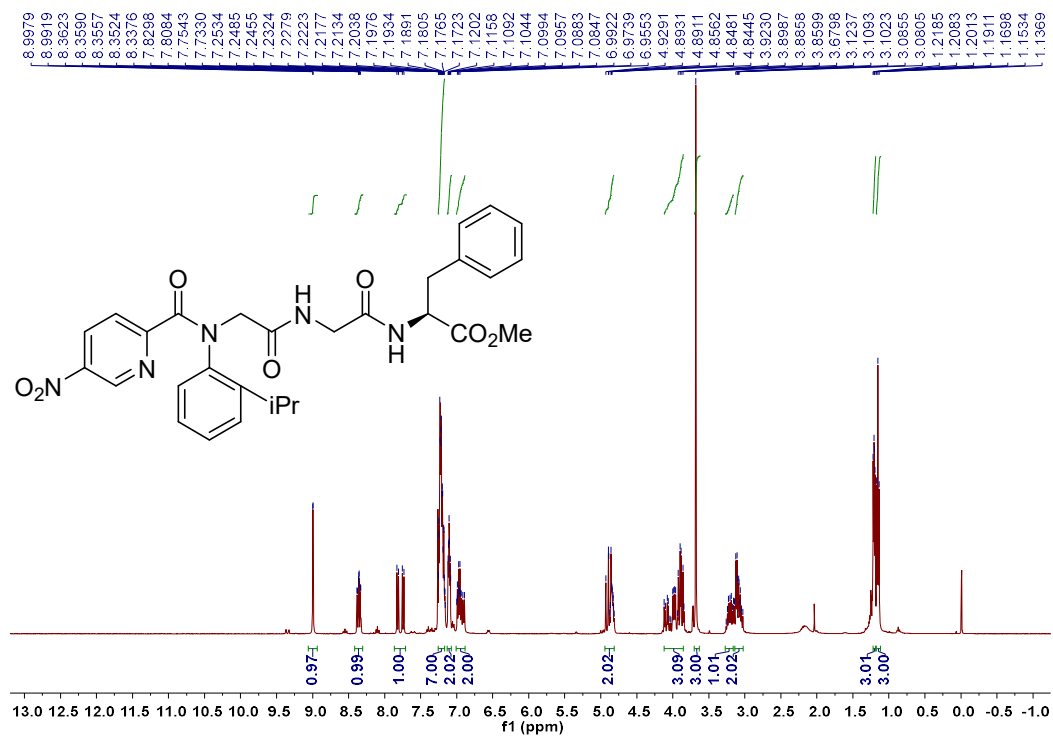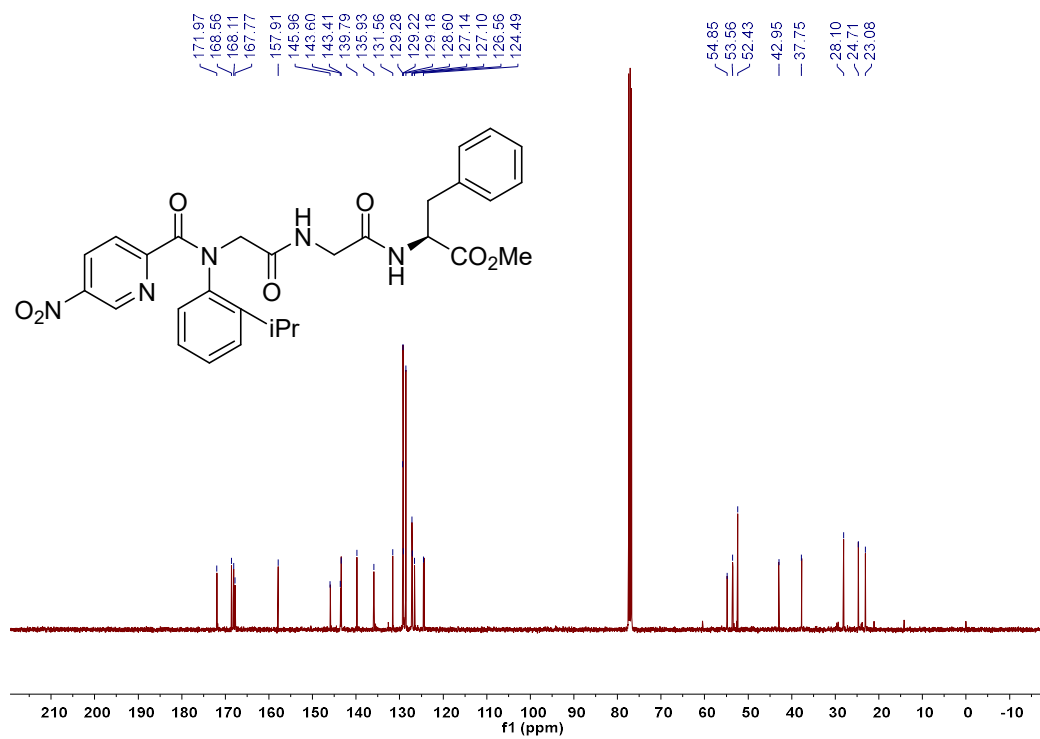

*rac-4h*

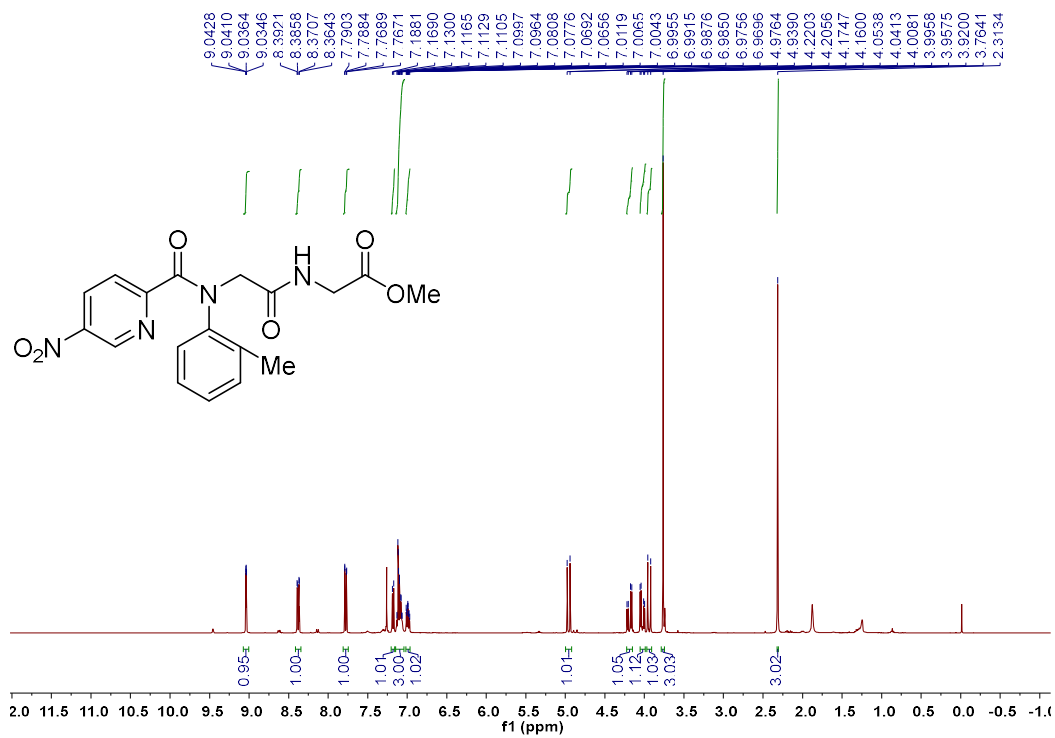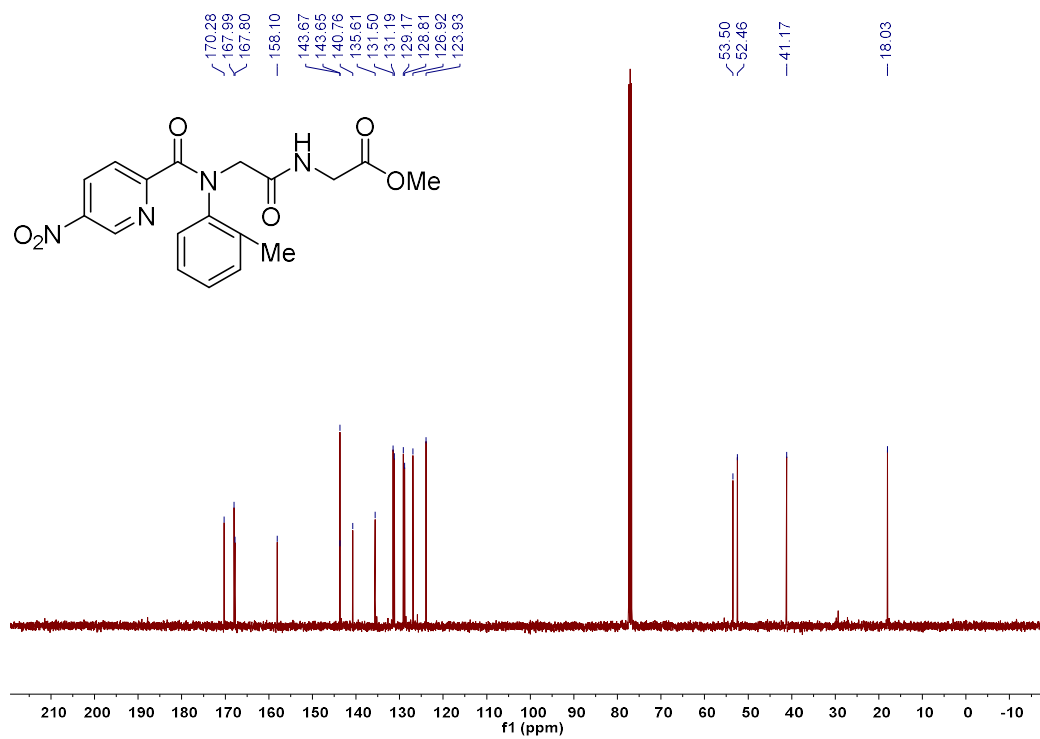

*rac-4i*

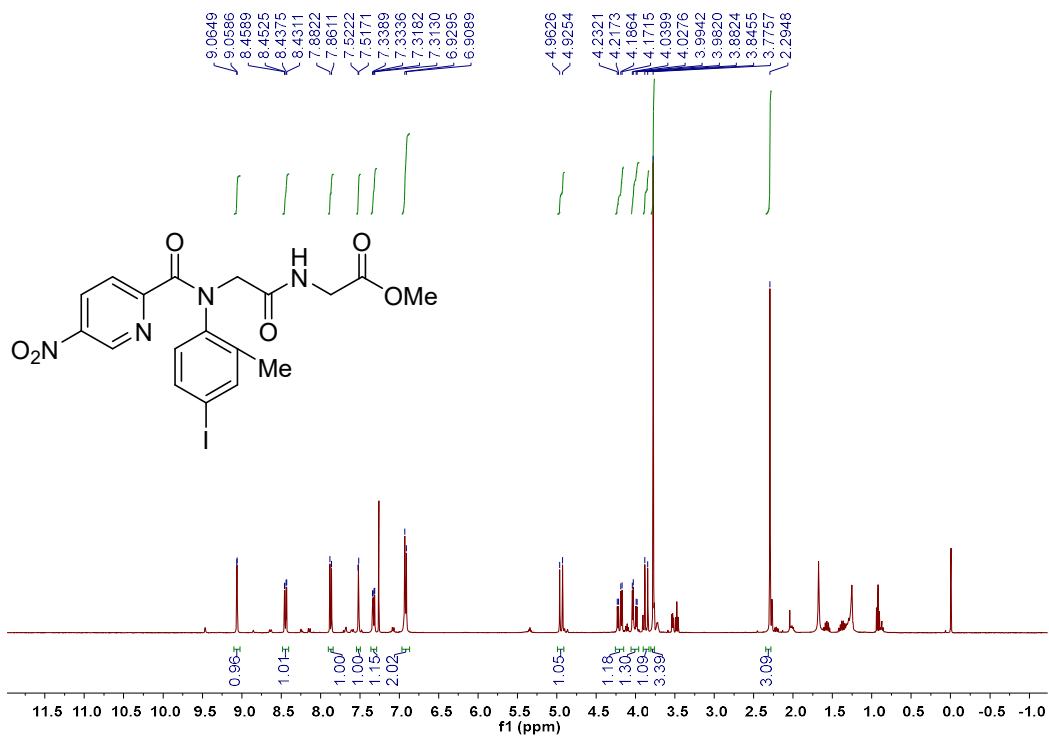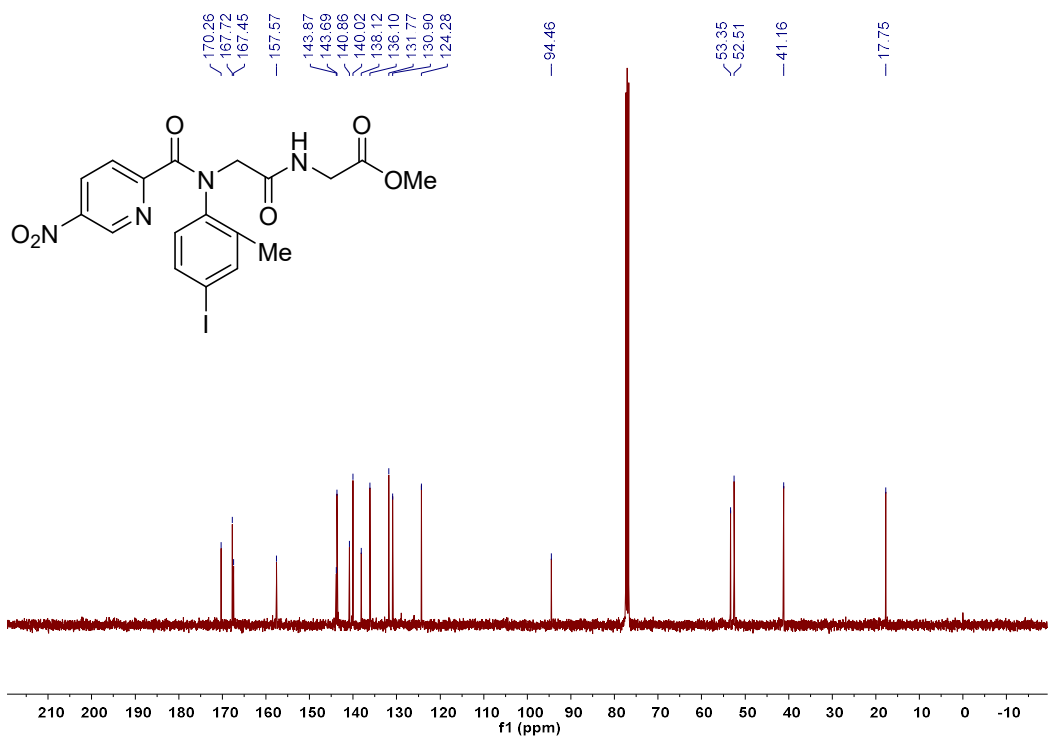

*rac-4j*

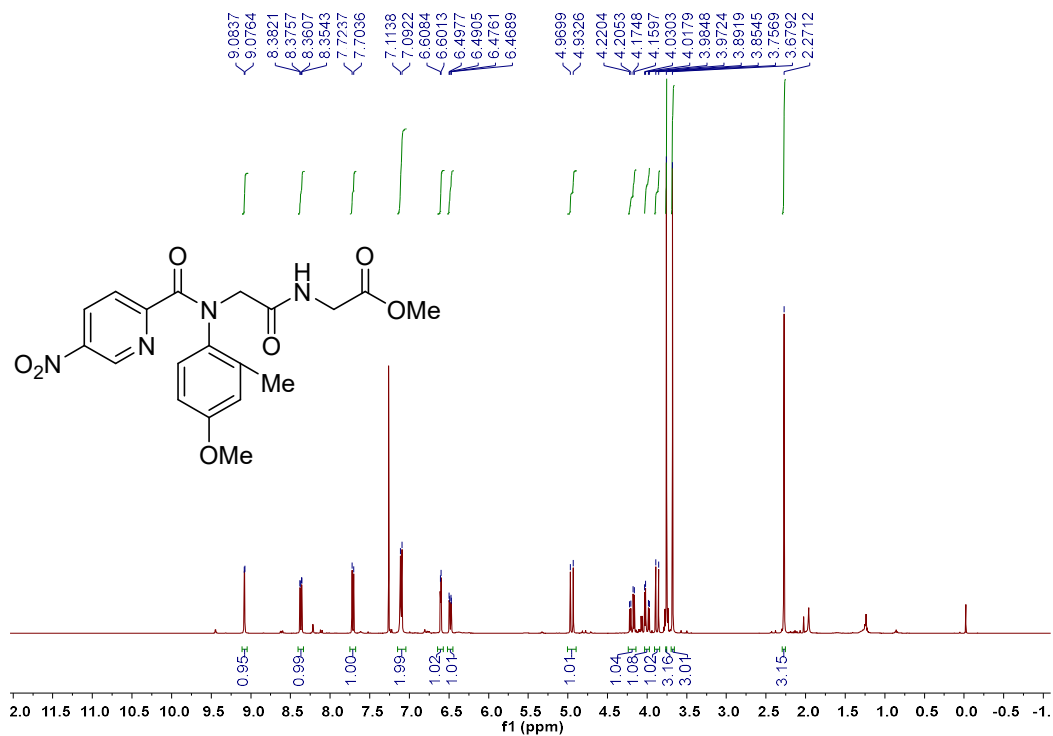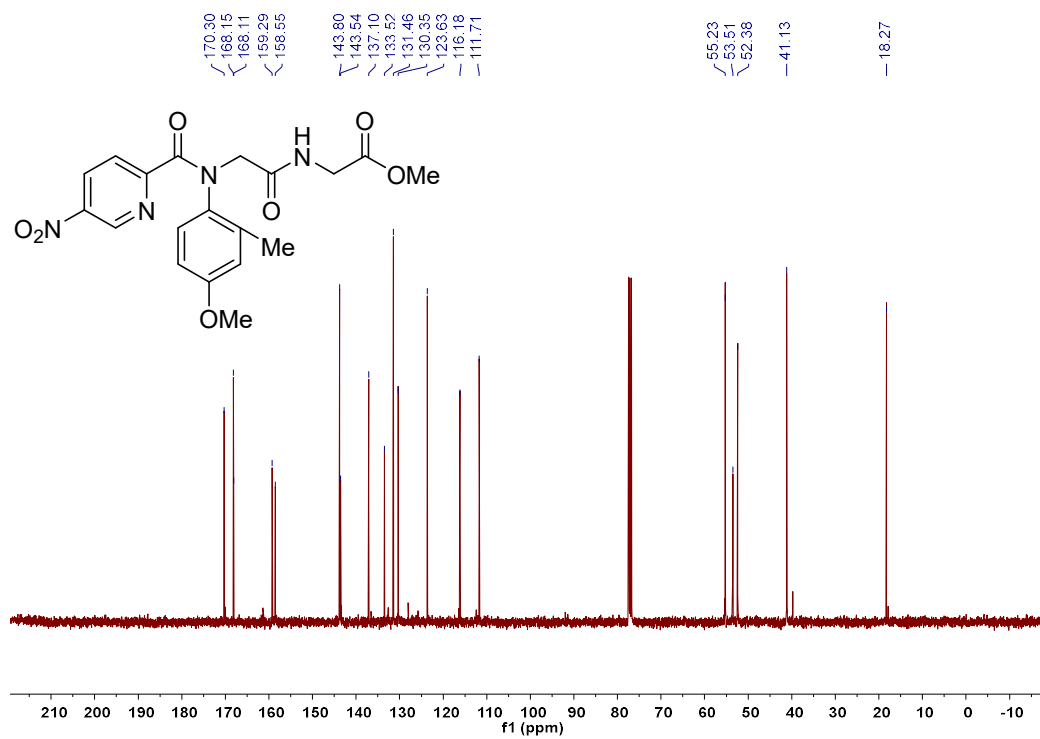

*rac-4k*

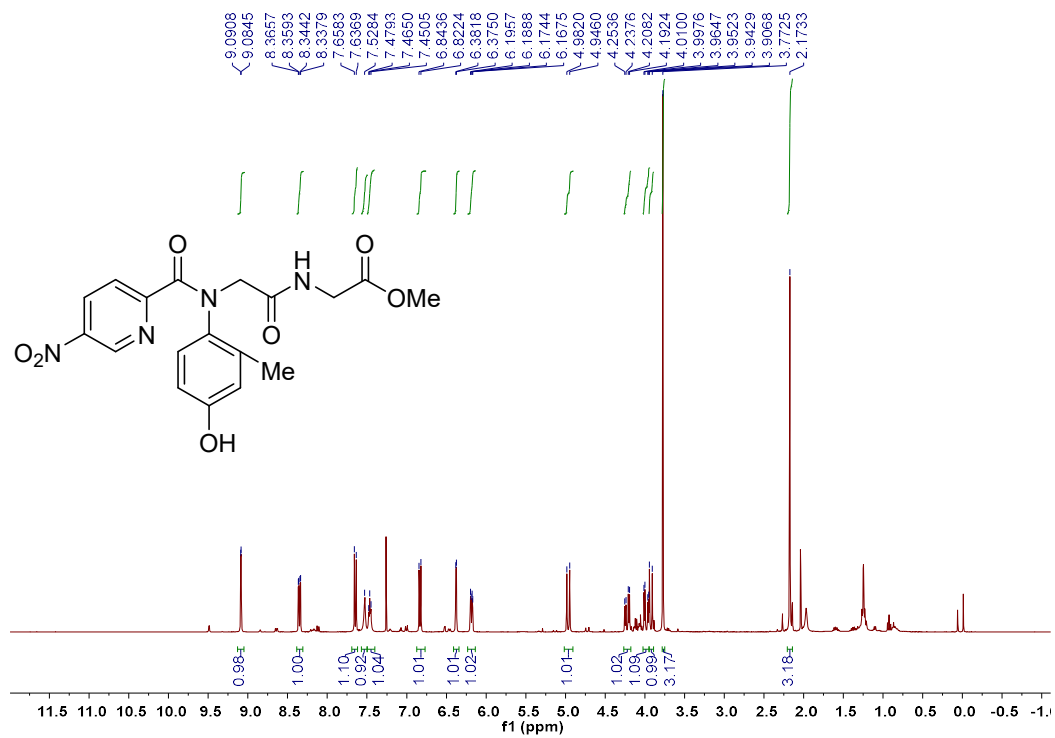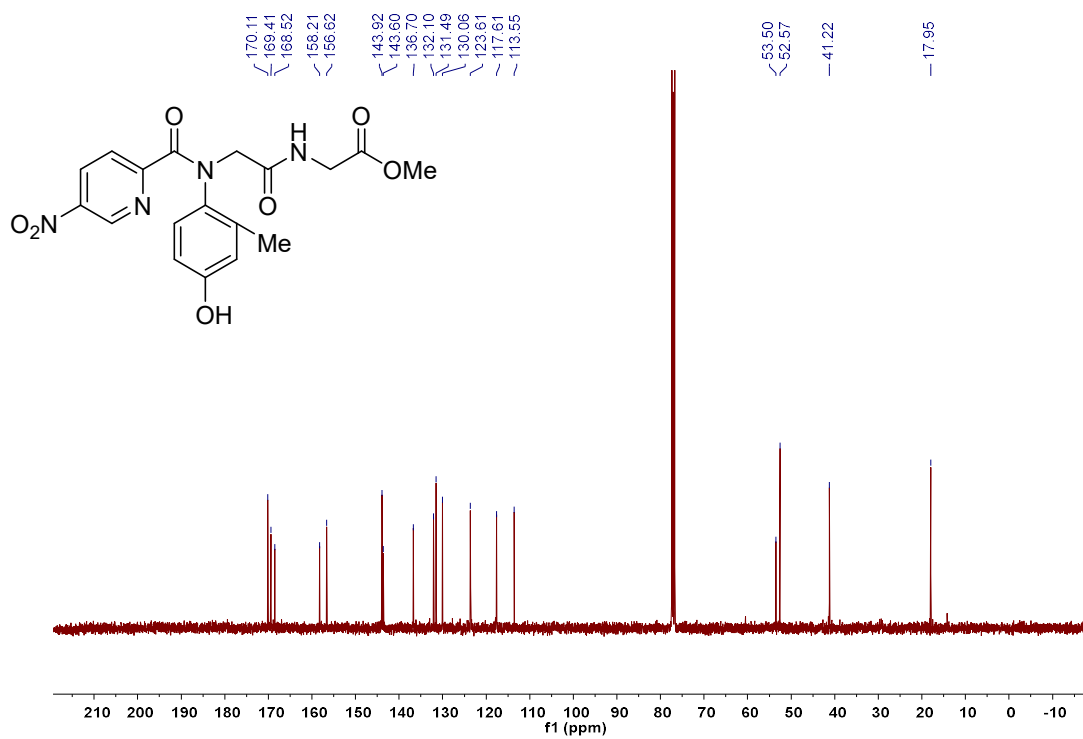

*rac-4l*

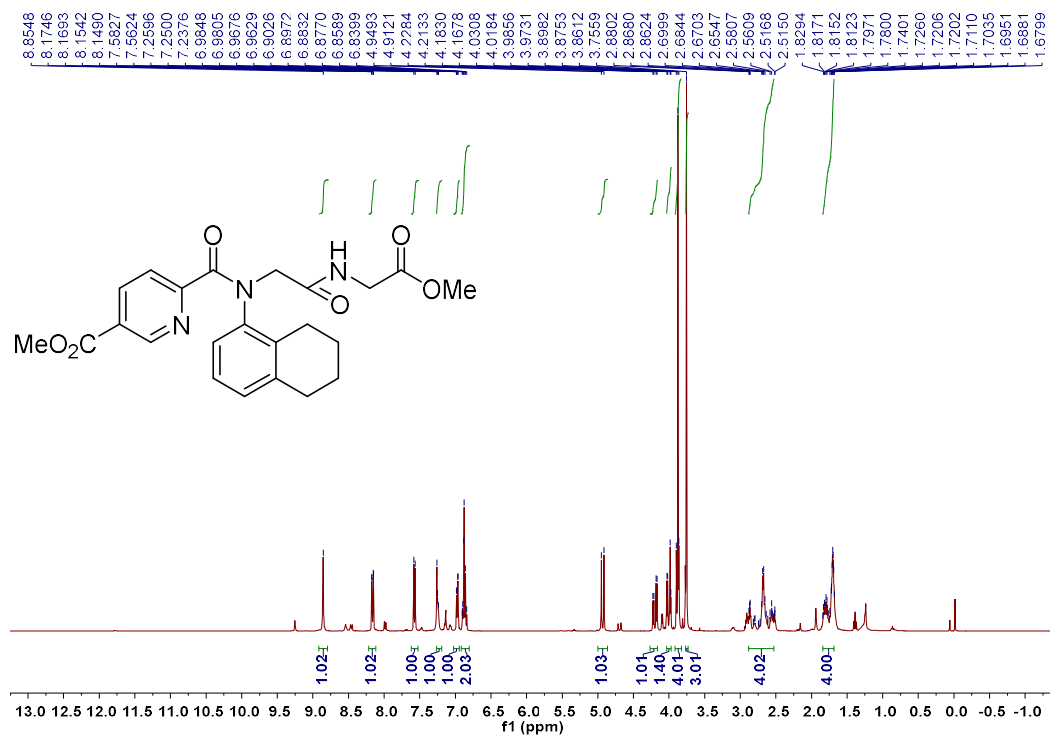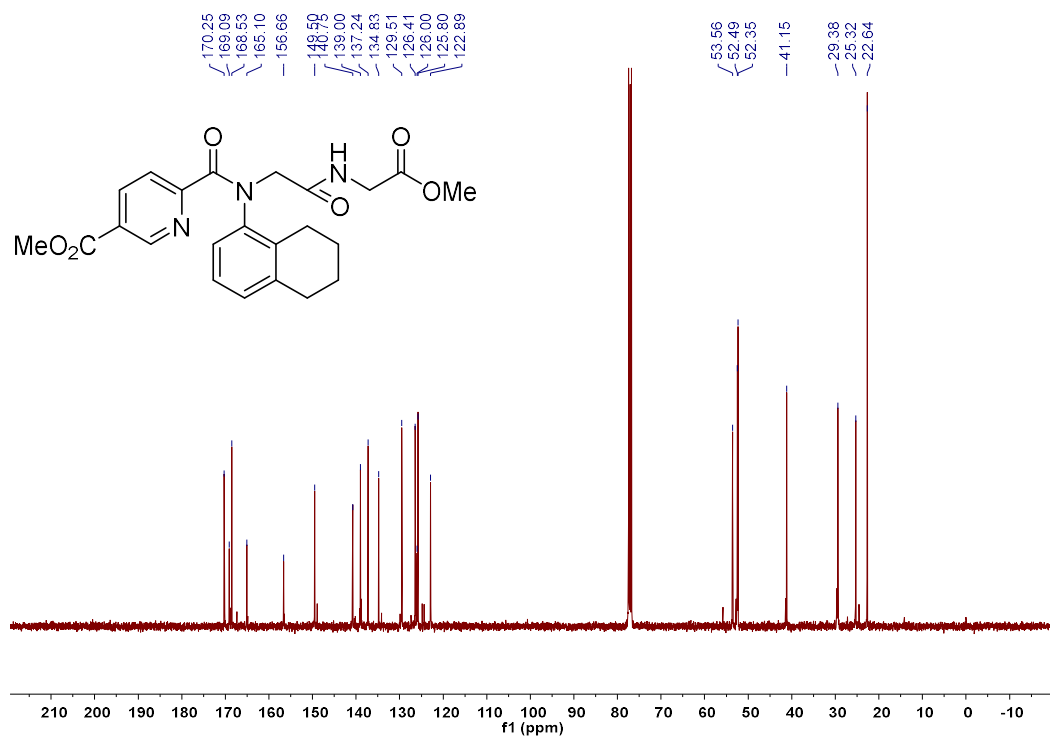

*rac-4m*

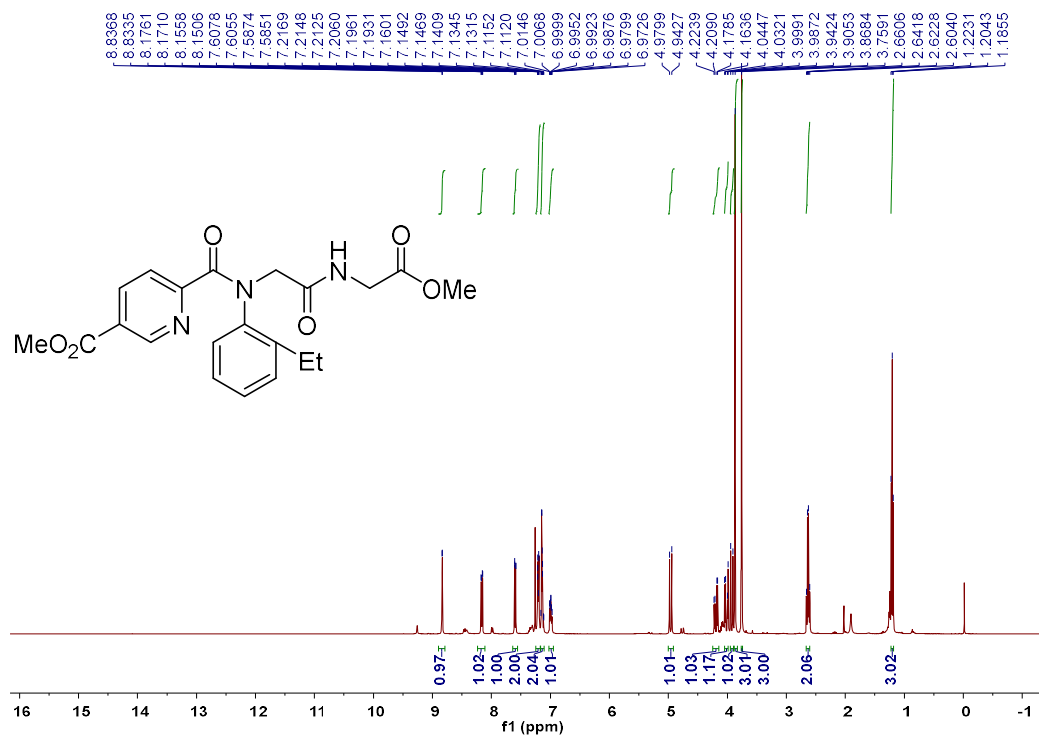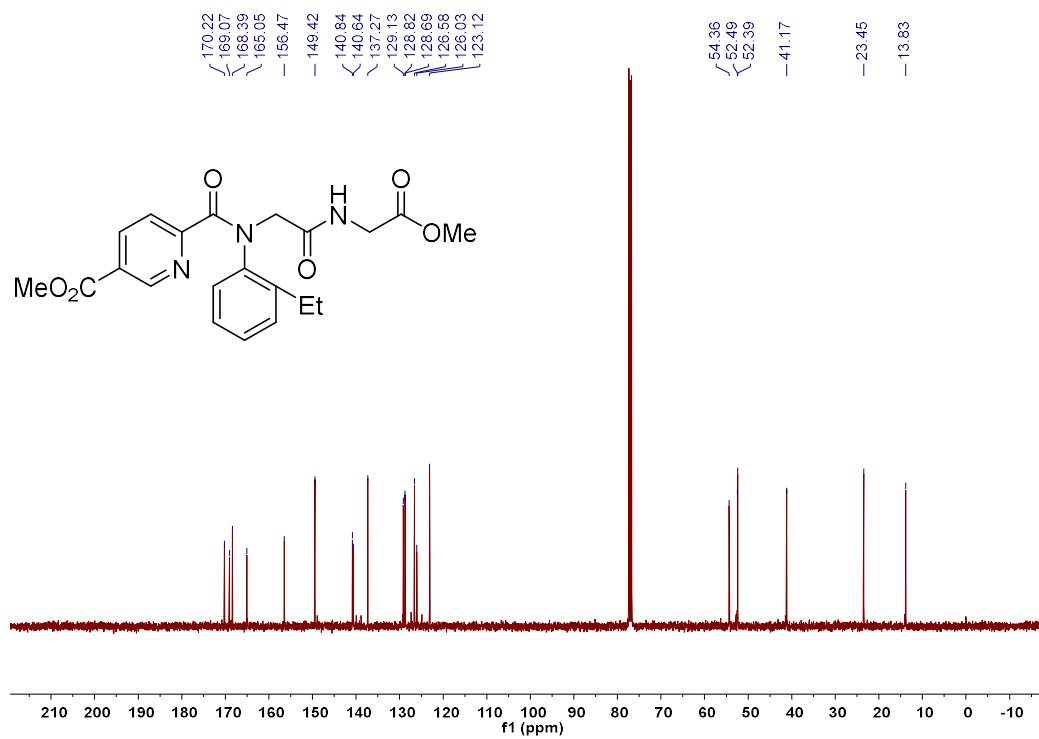



*rac-4n*

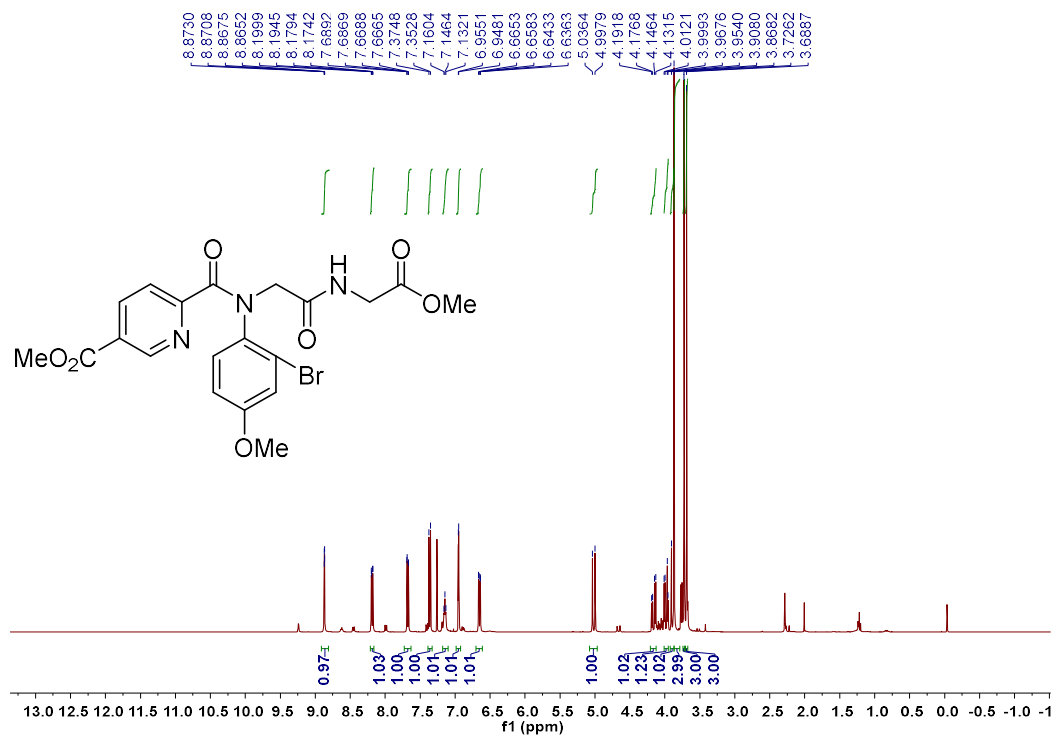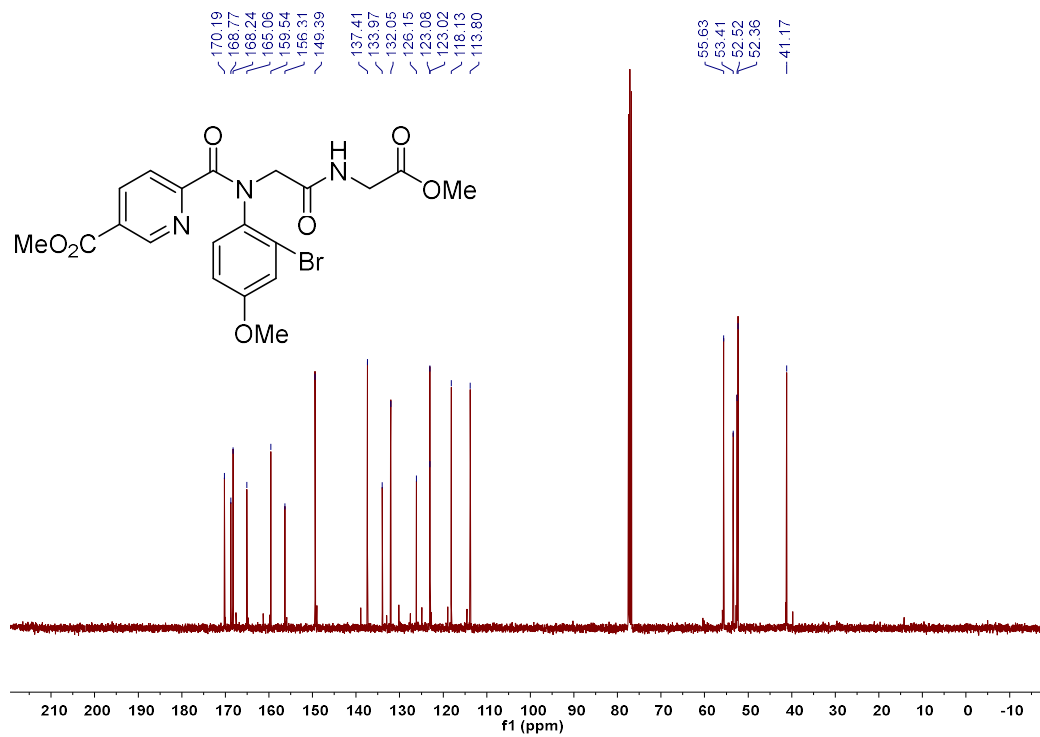

*rac-4o*

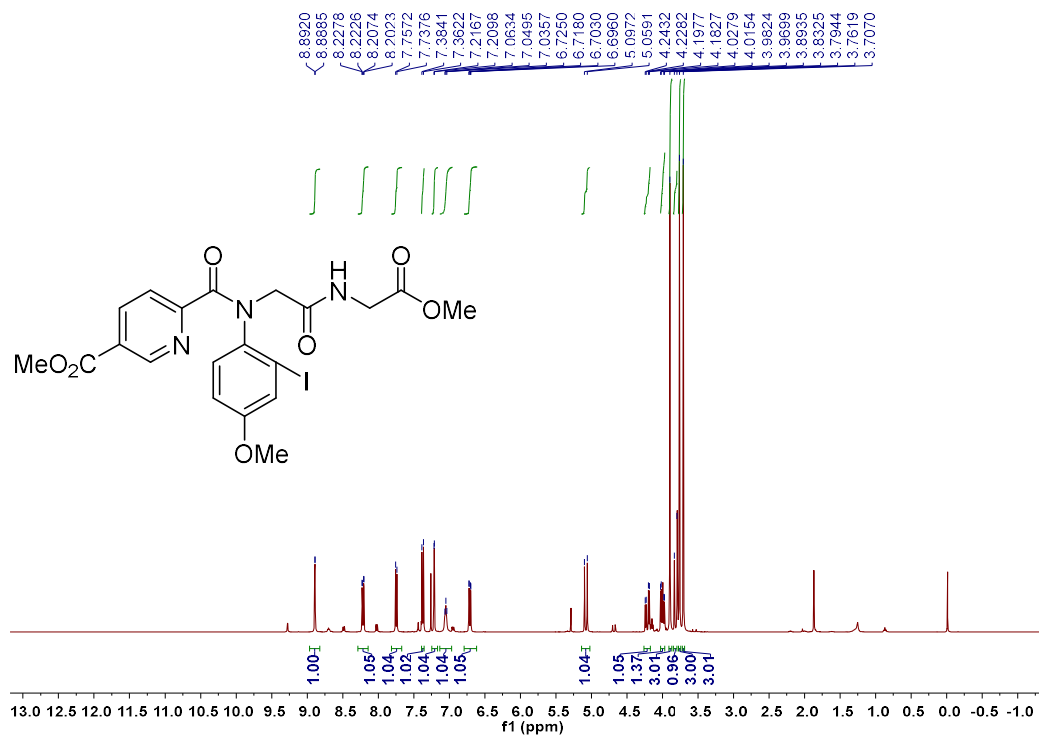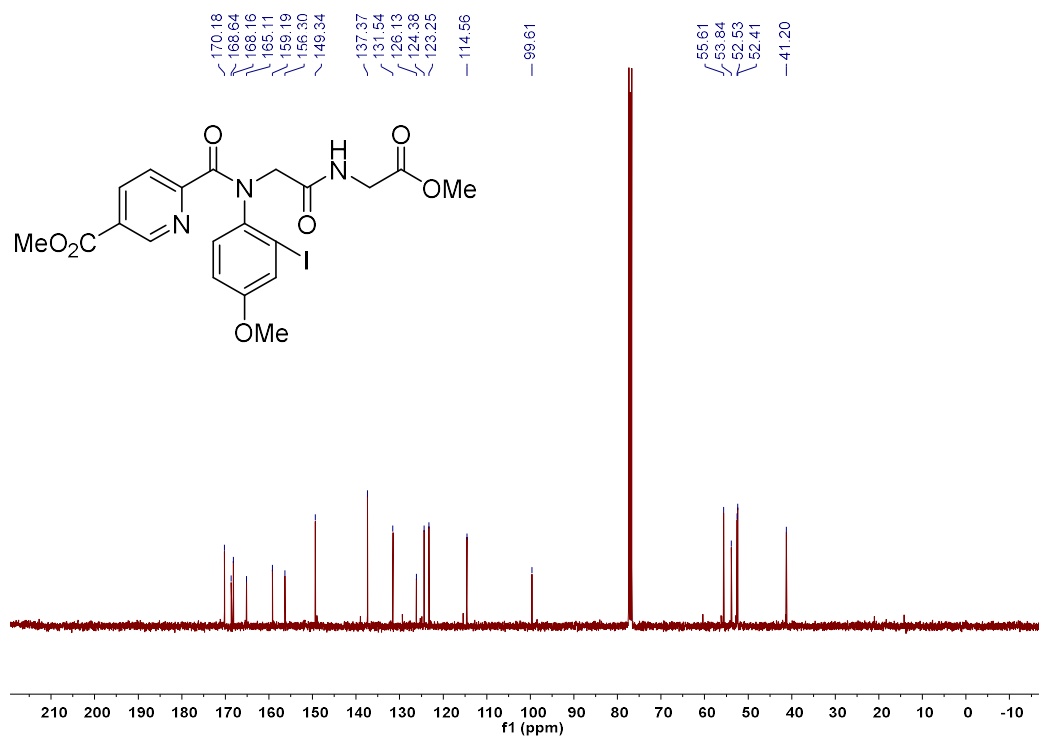

*rac-4p*

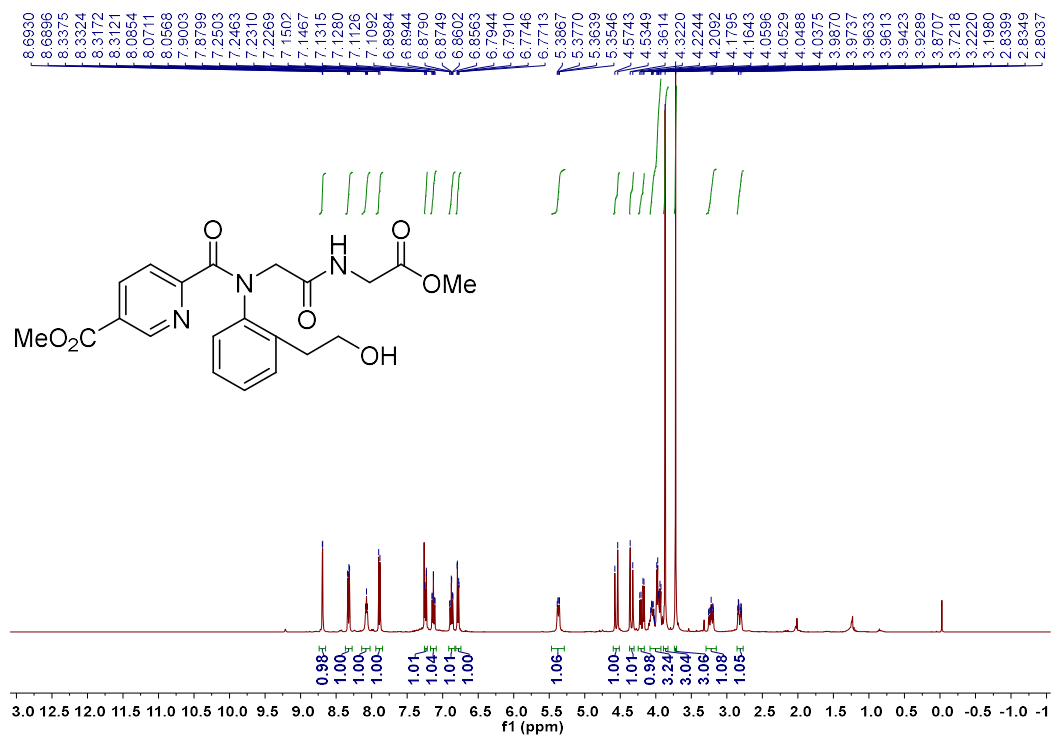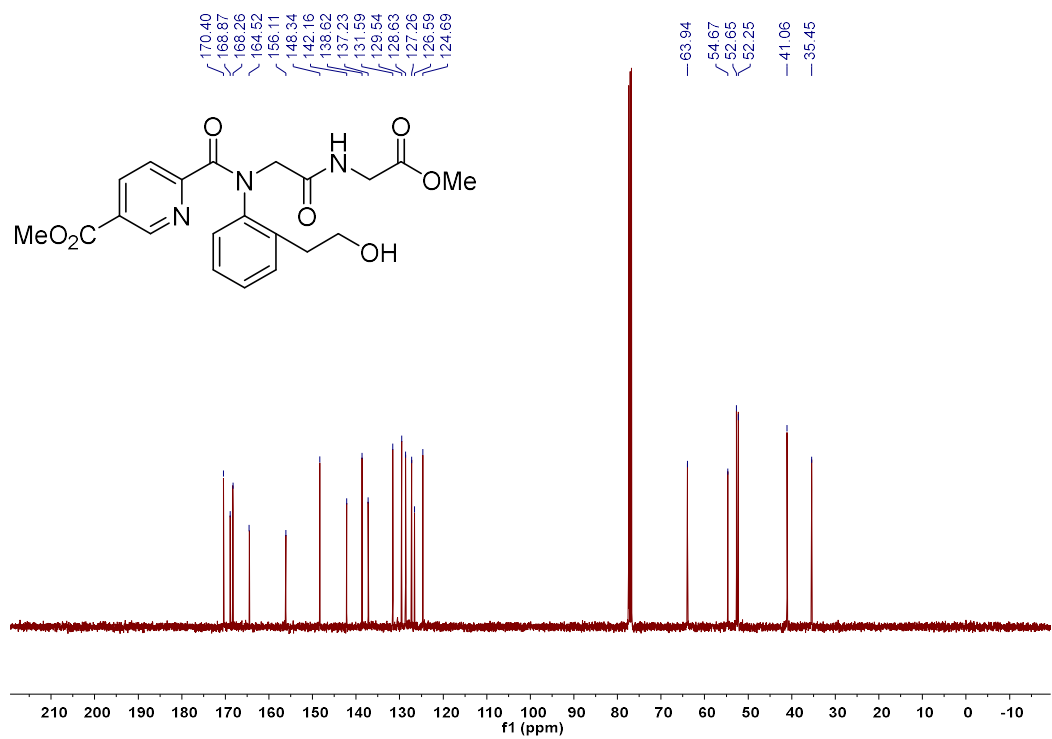

4qq

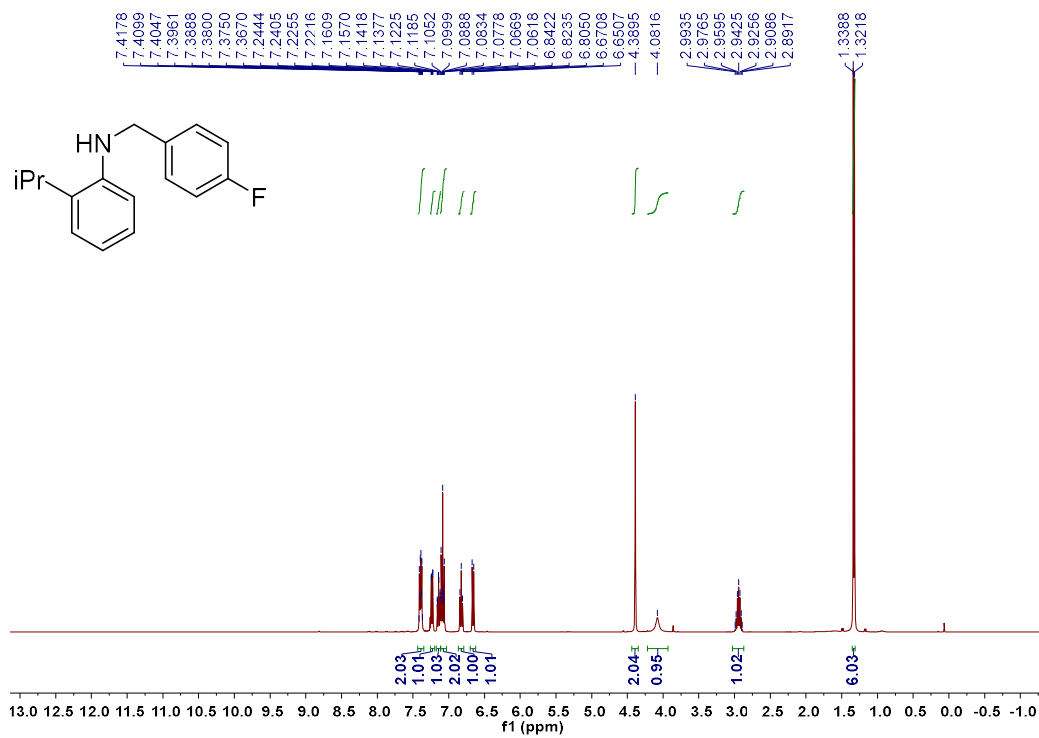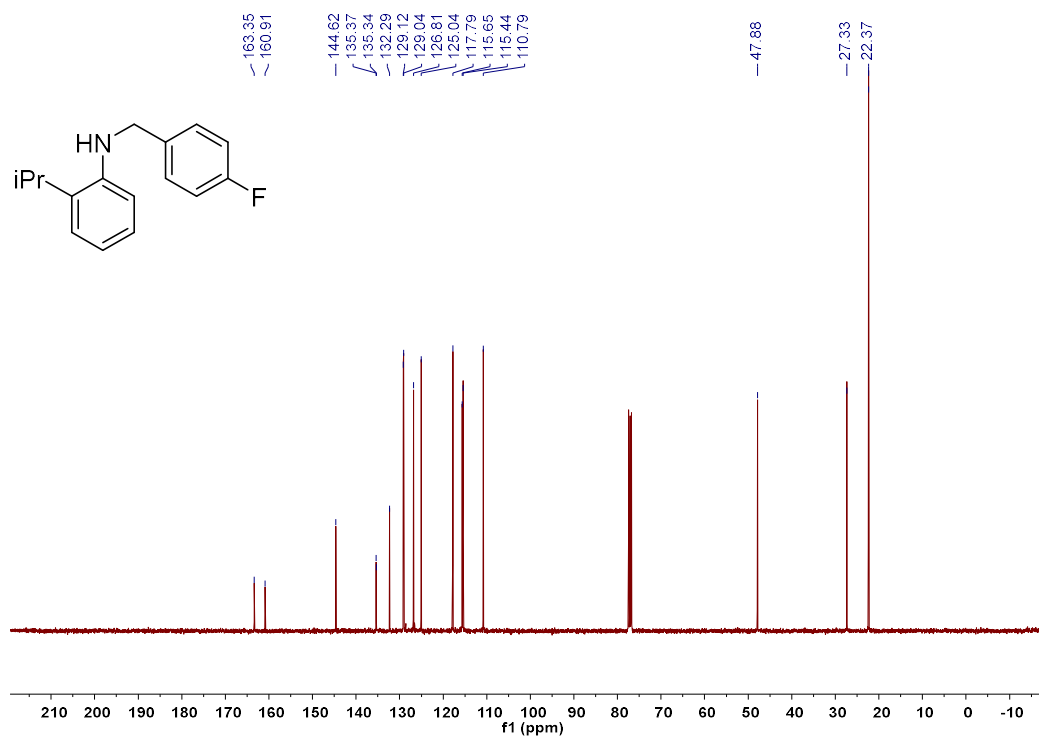

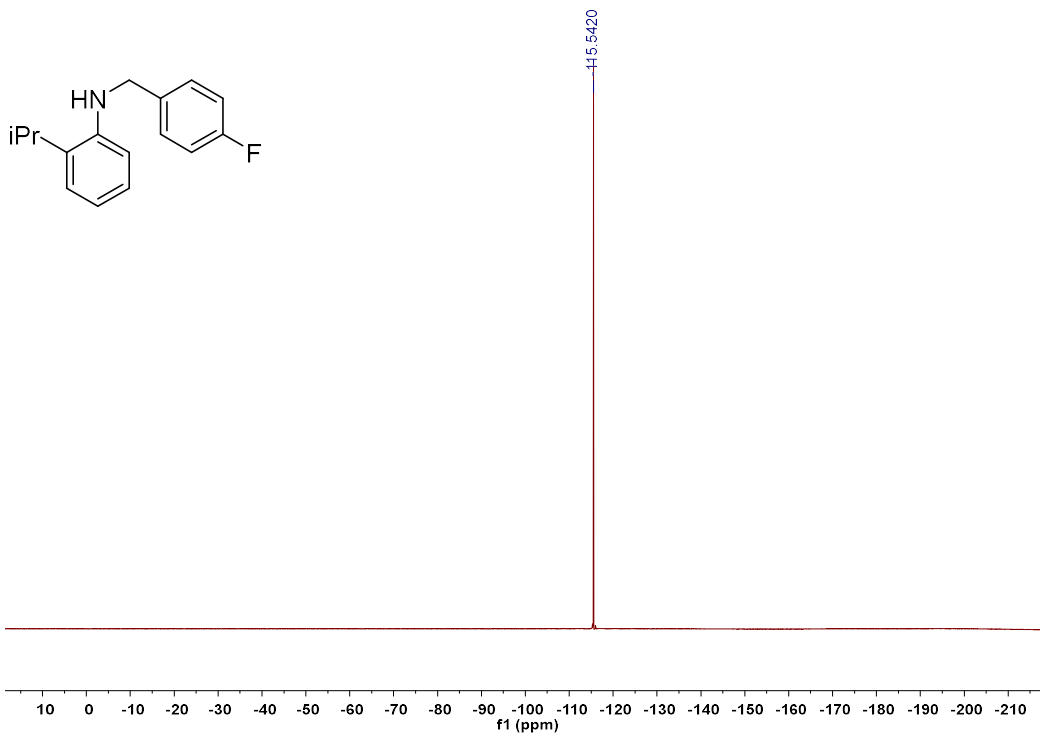

*rac-4q*

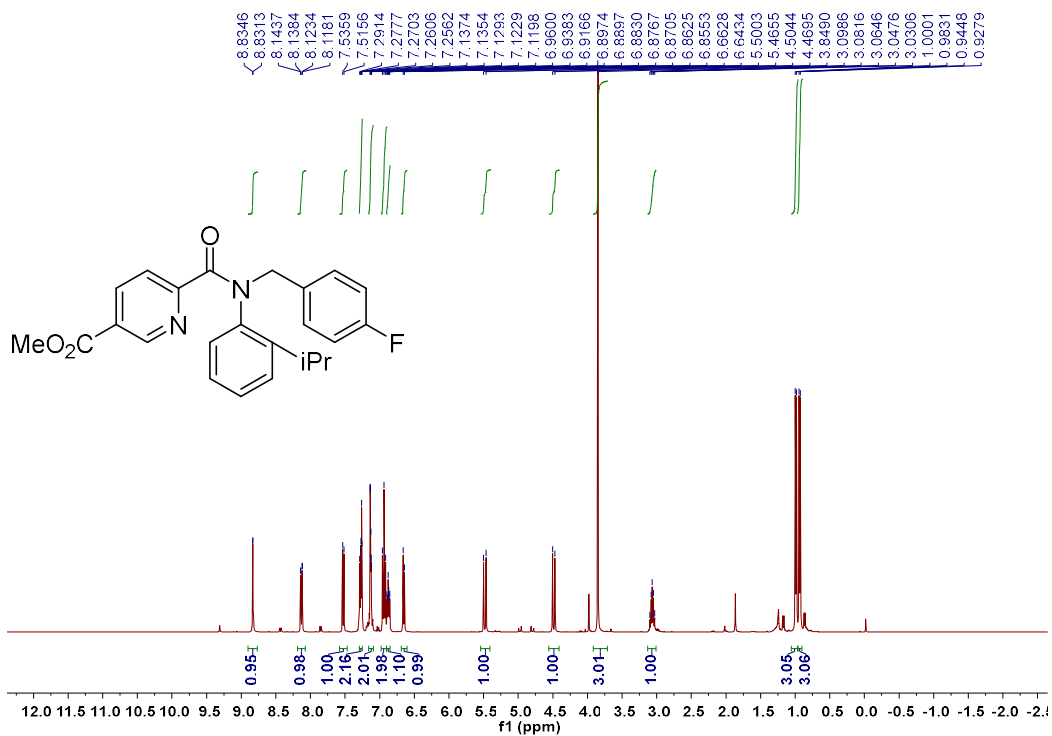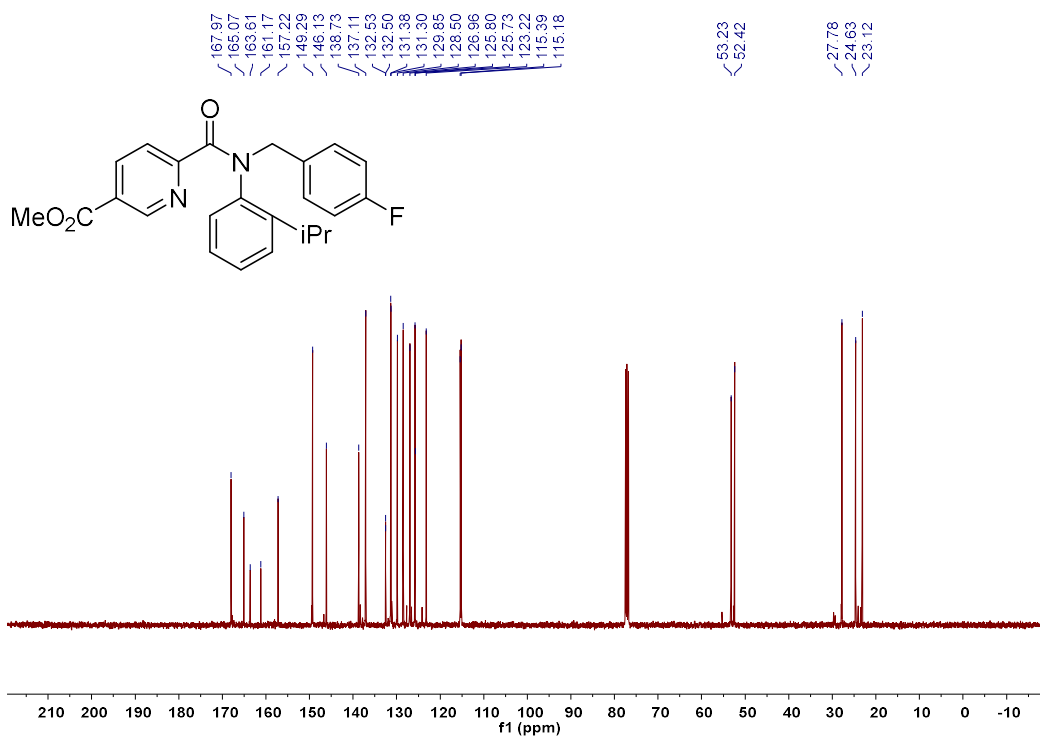

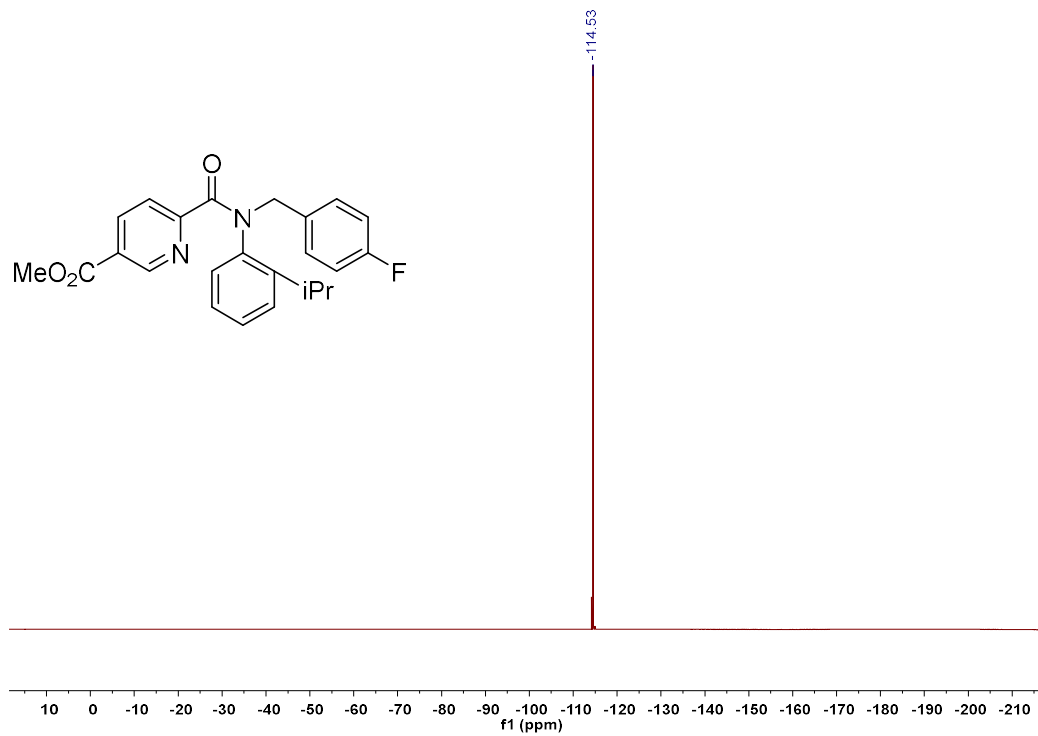

4rr

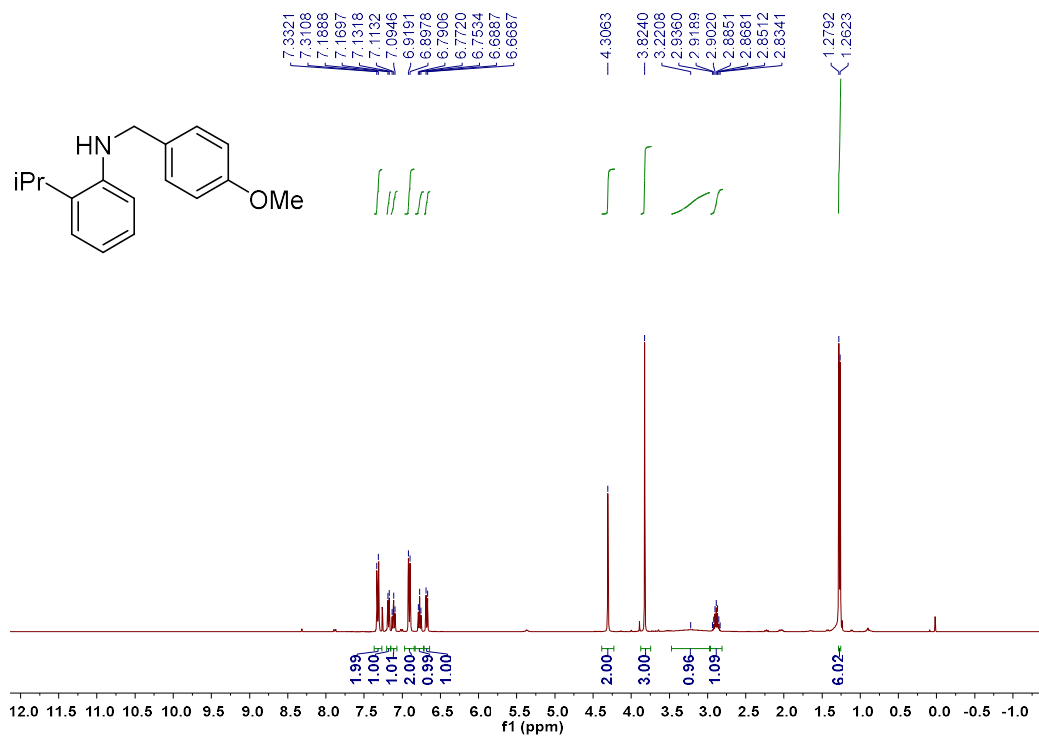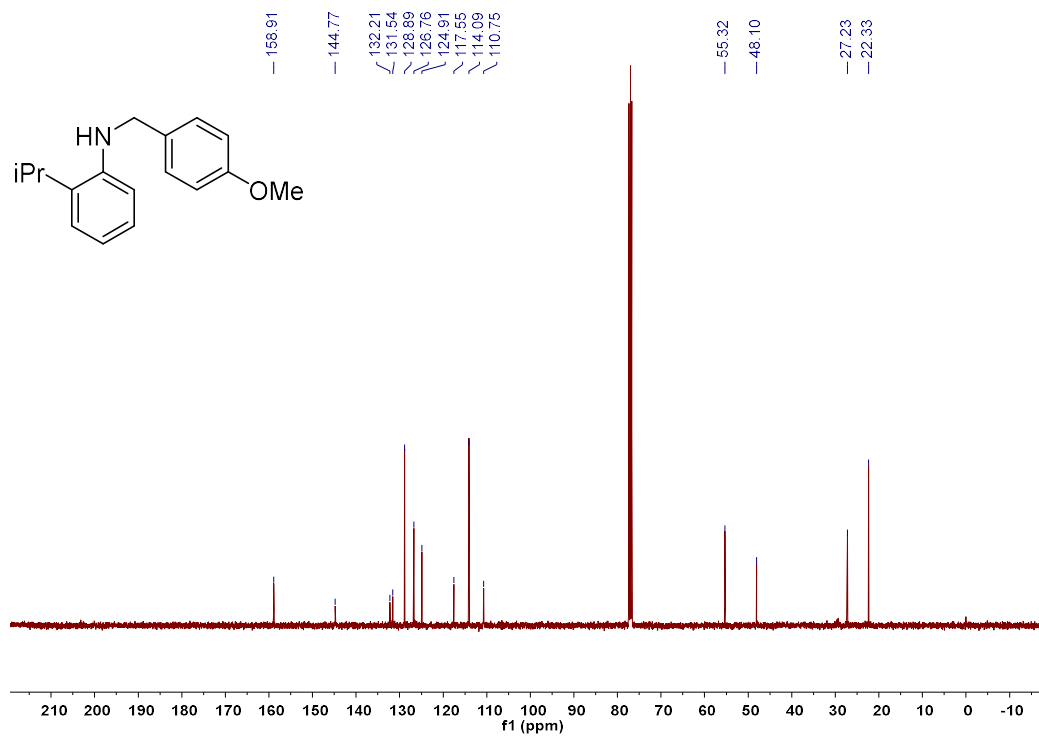



*rac-4r*

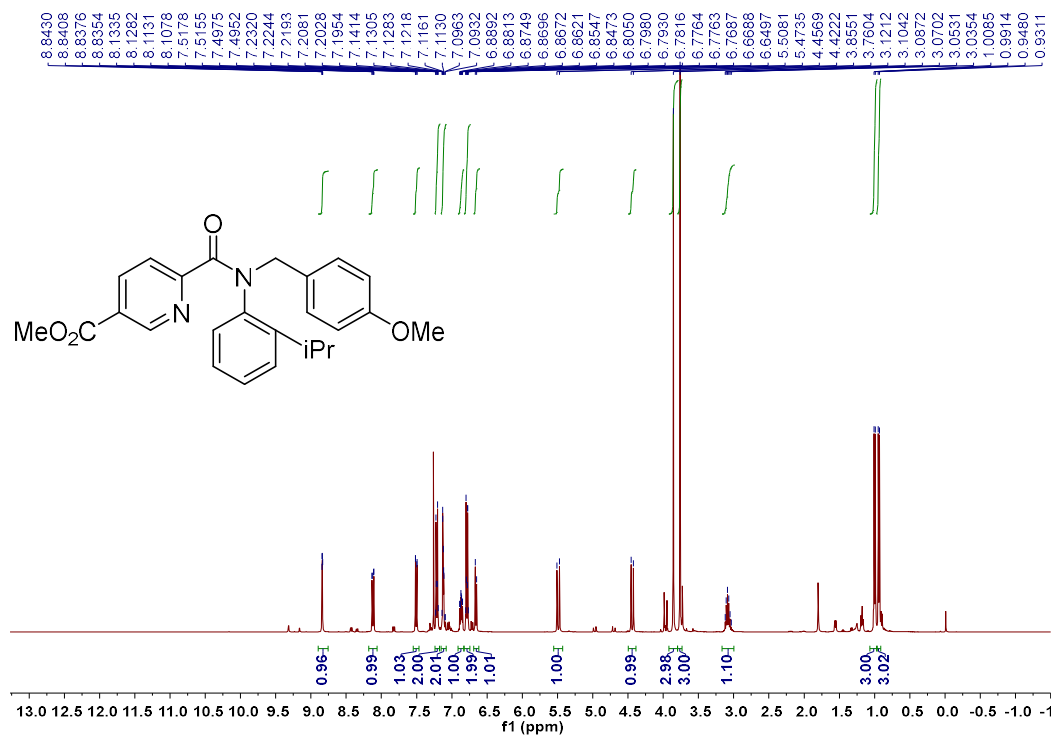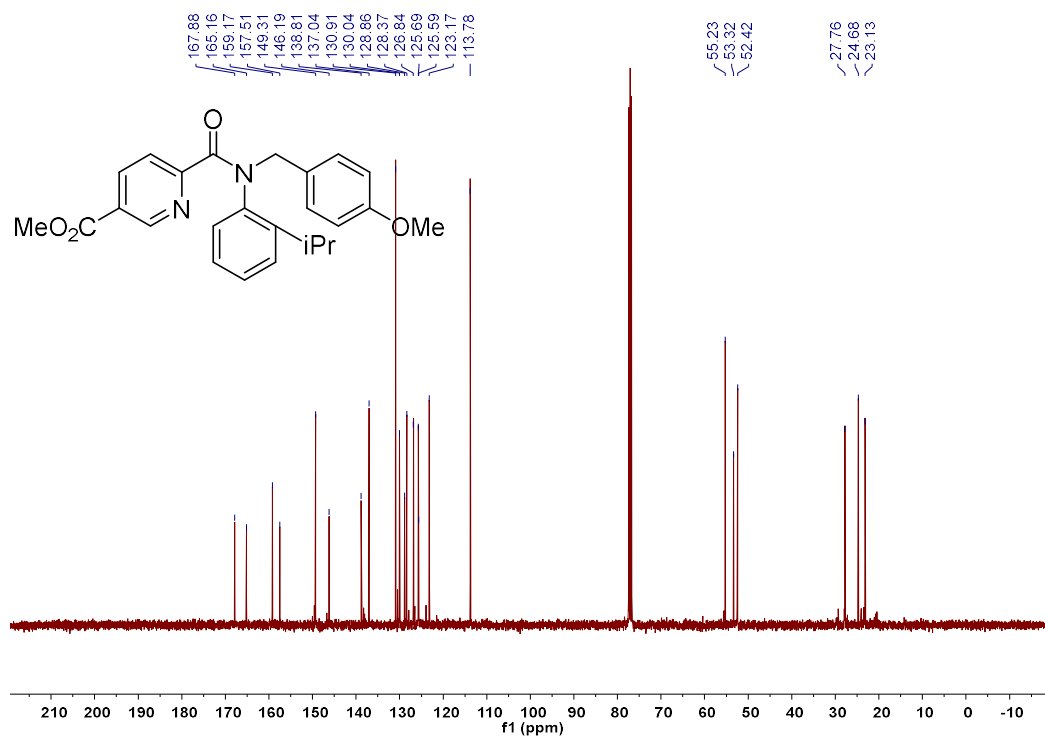

4ss

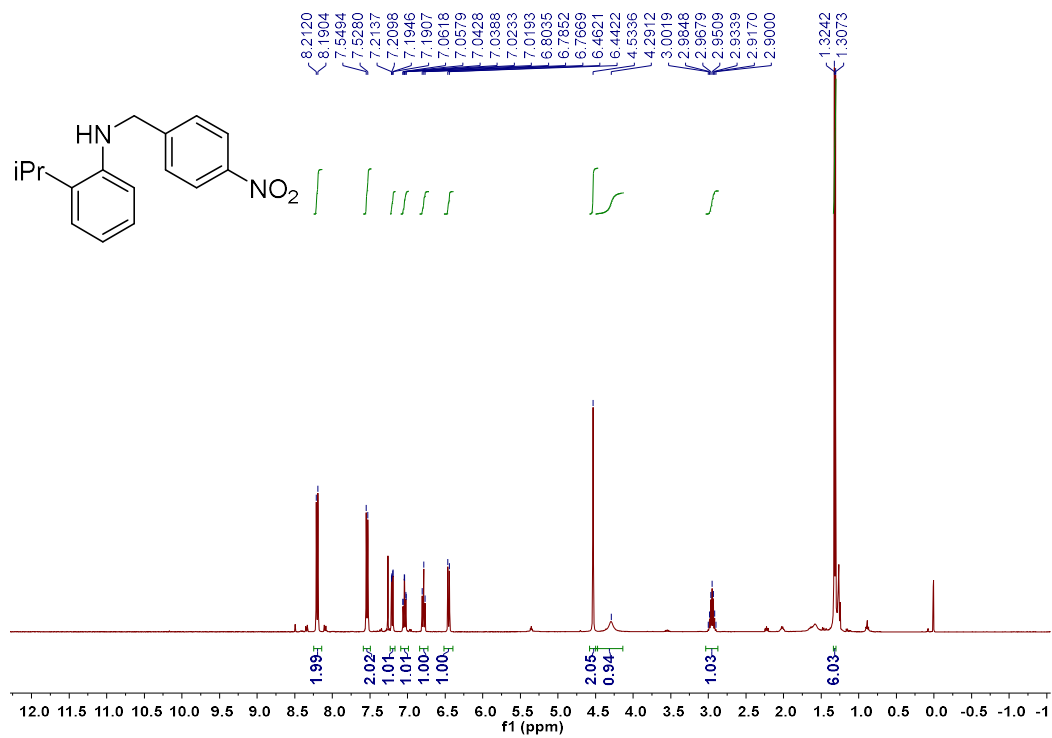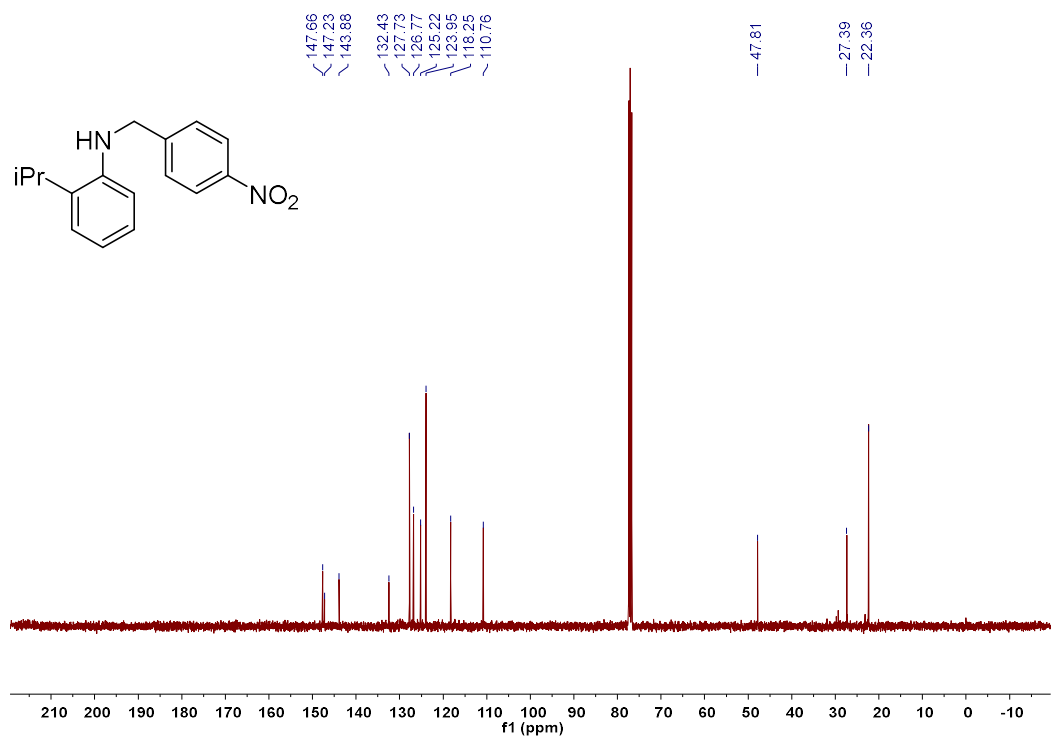

*rac-4s*

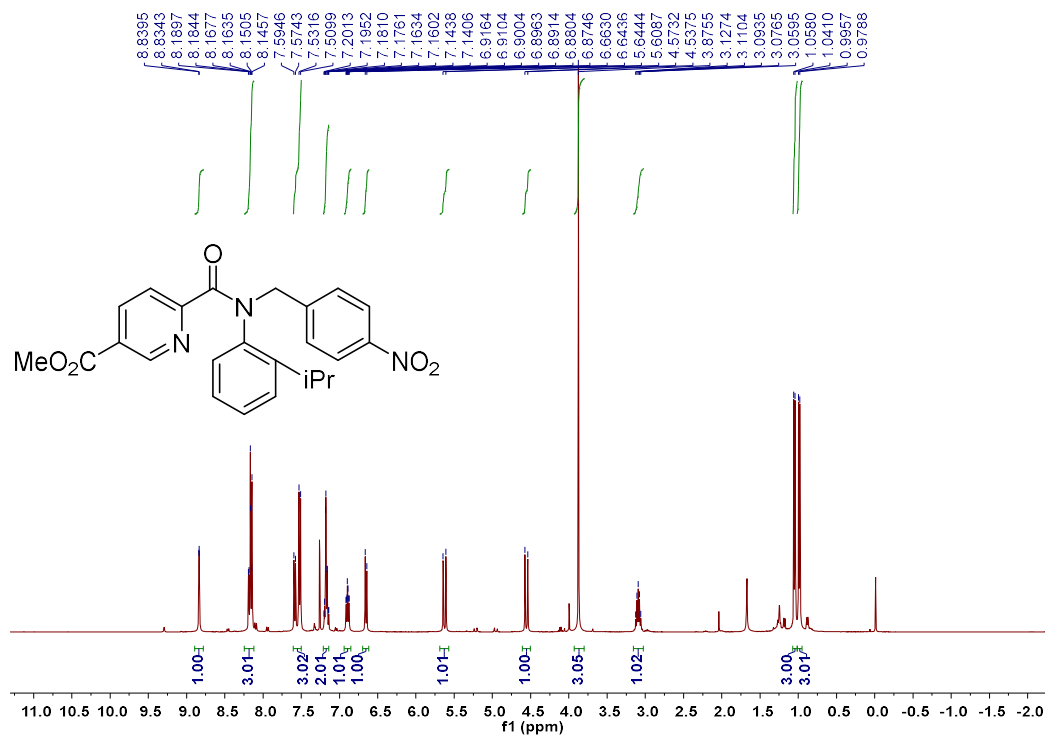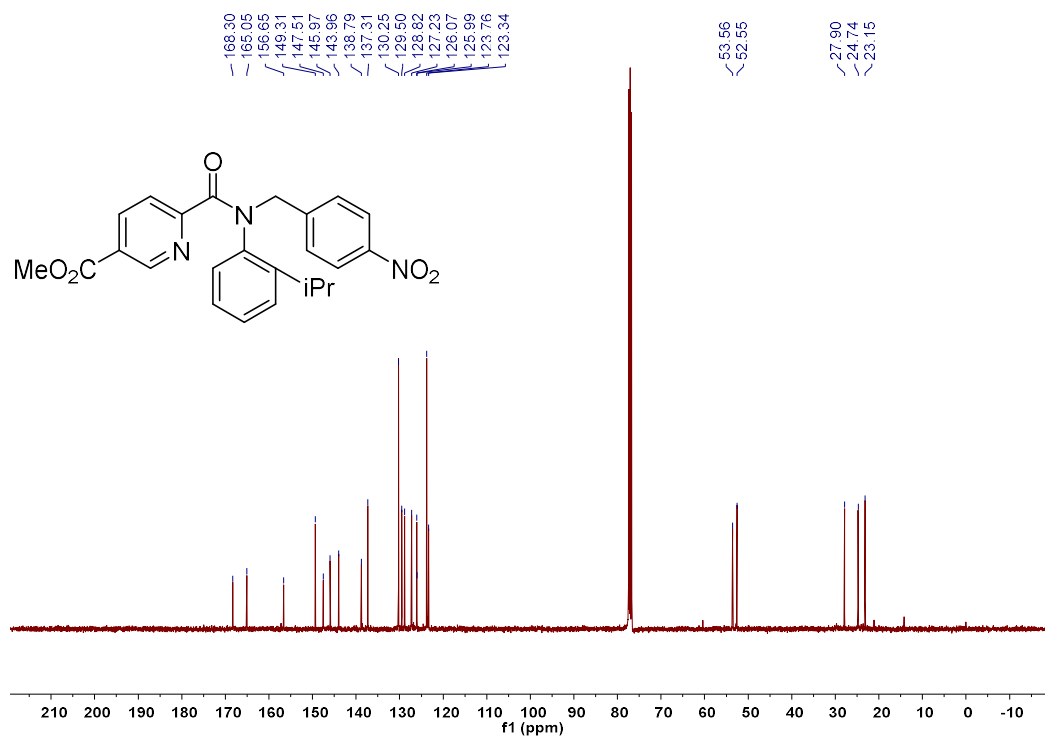

*rac-4t*

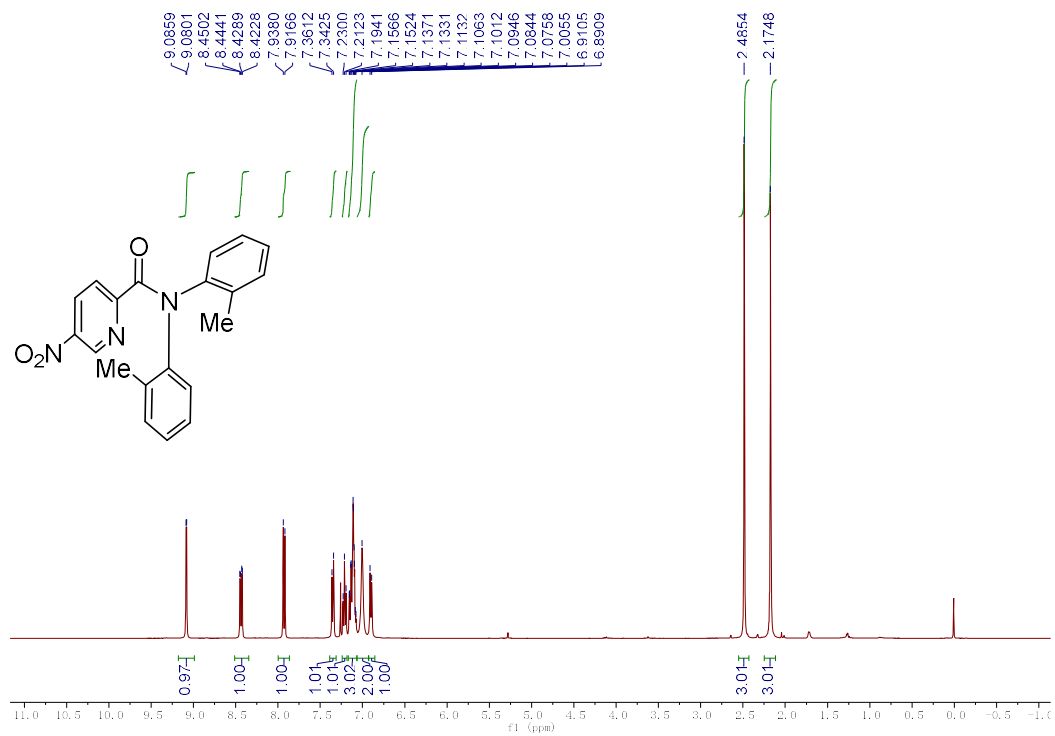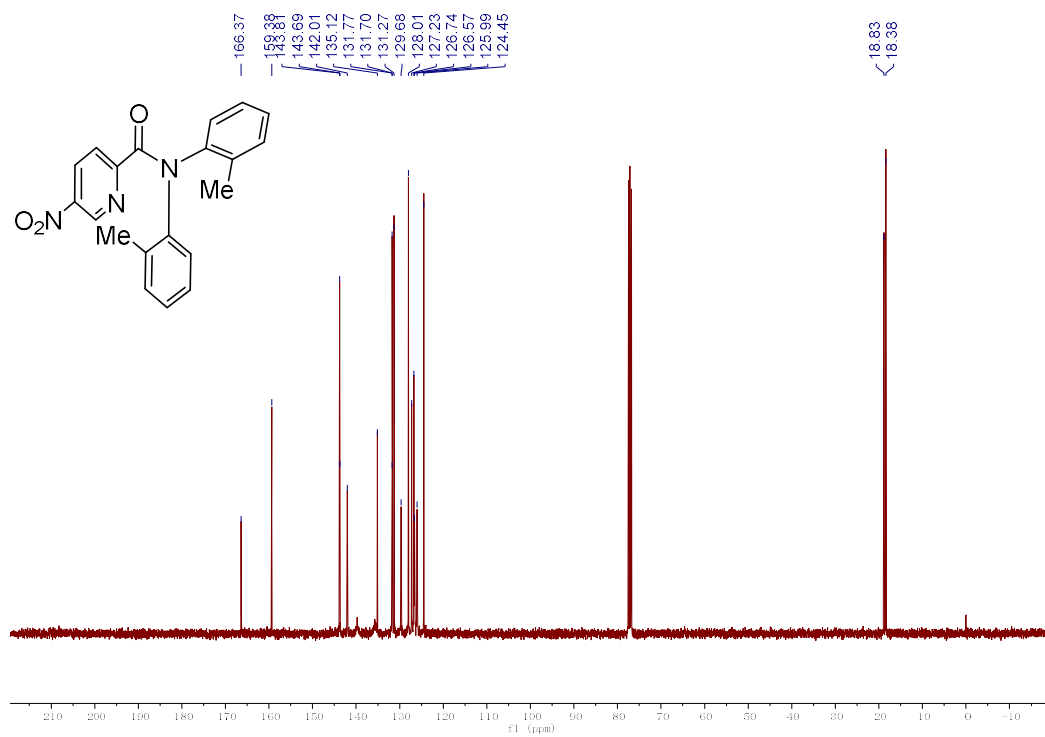

*rac-4u*

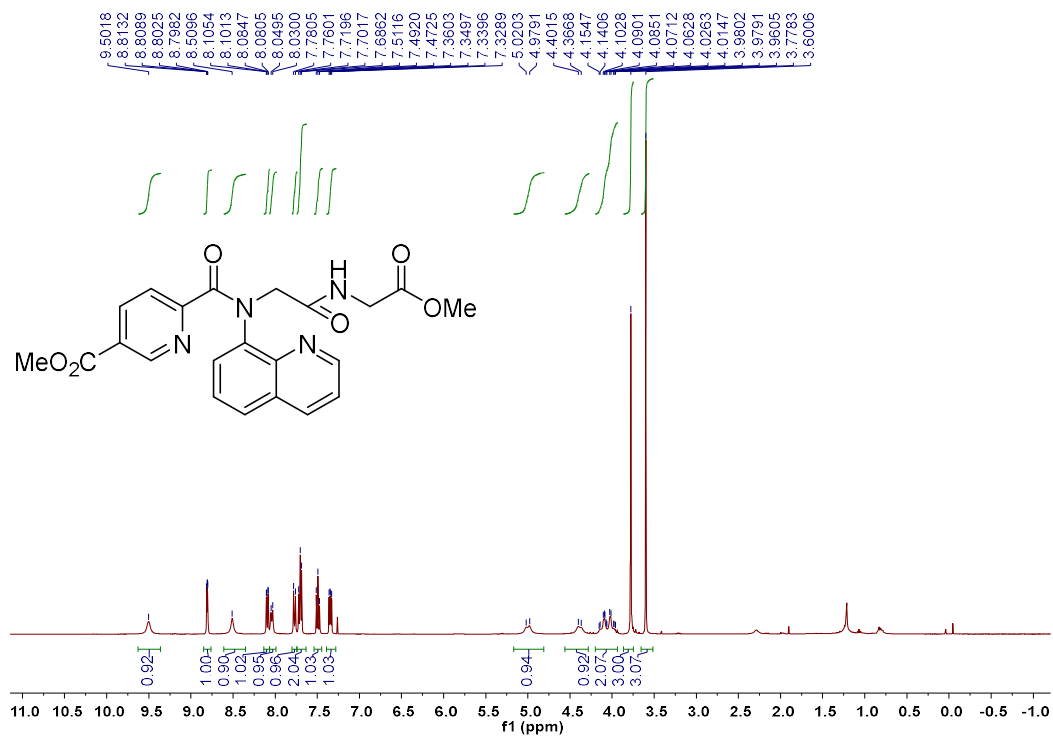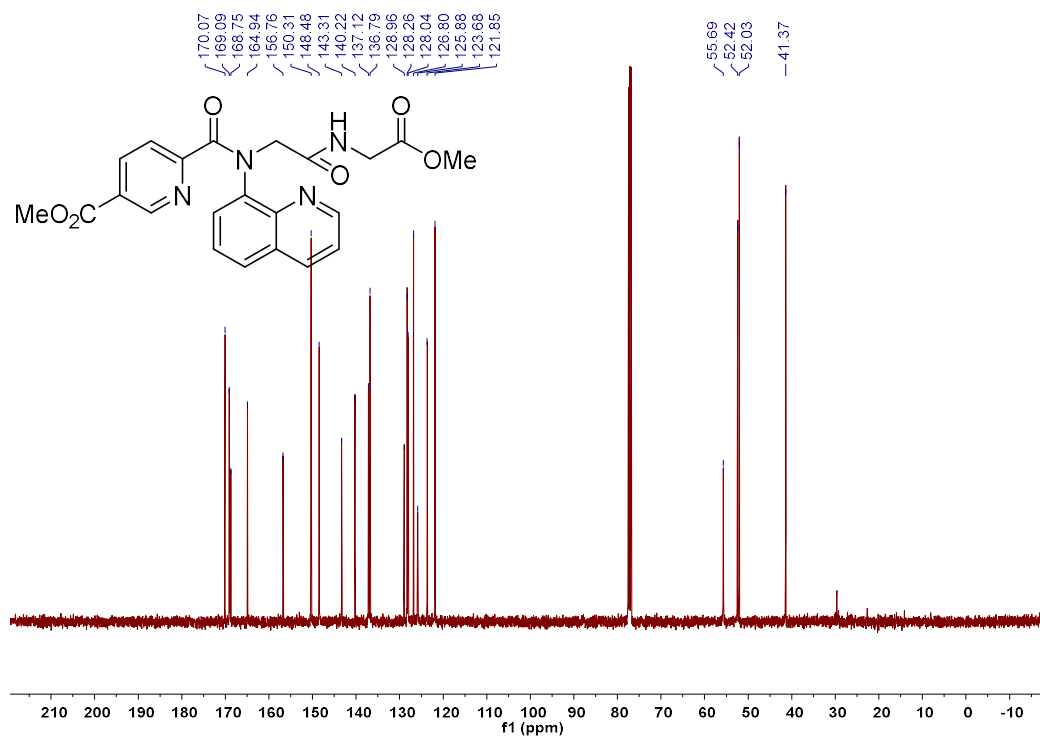

*rac-4v*

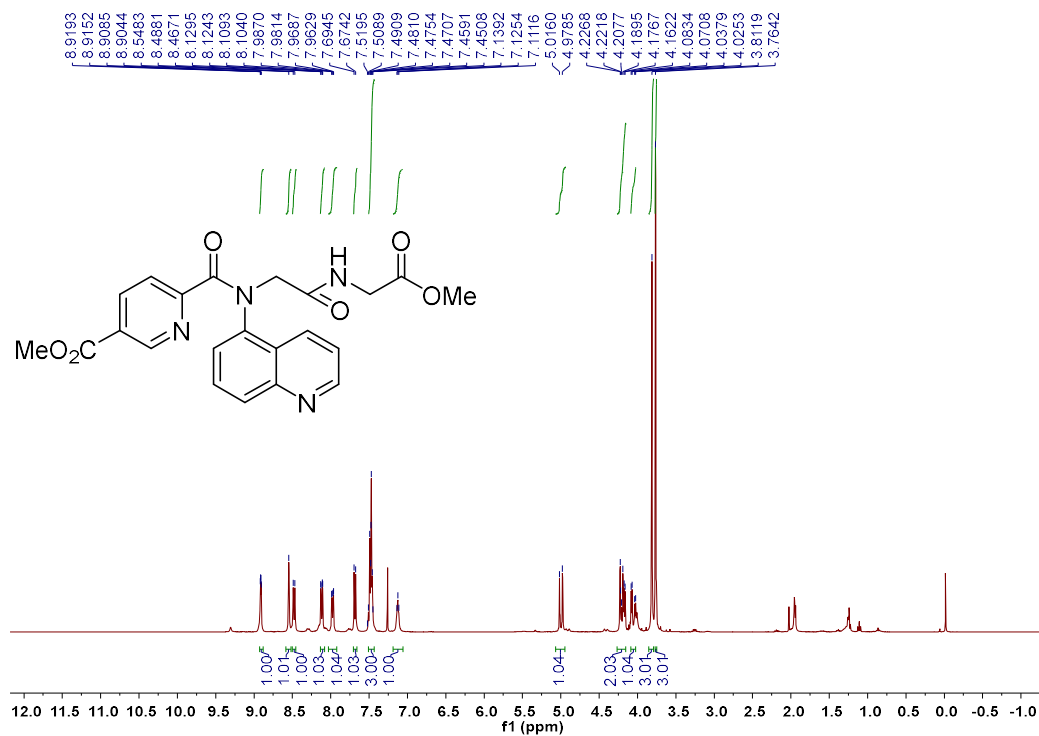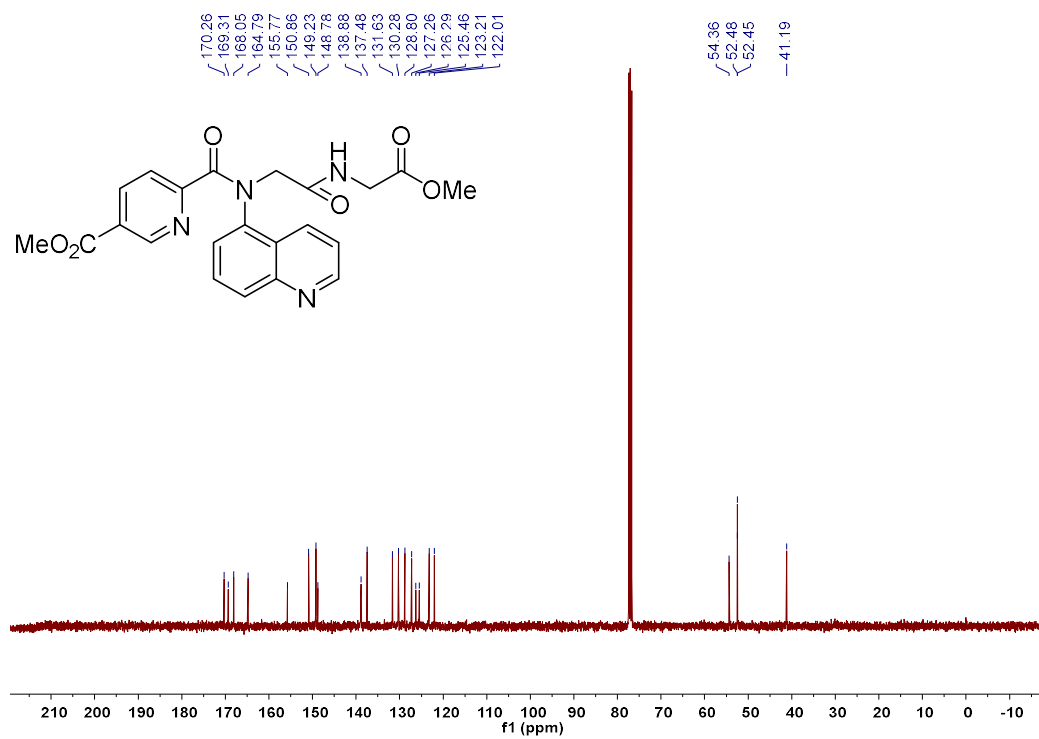

3a

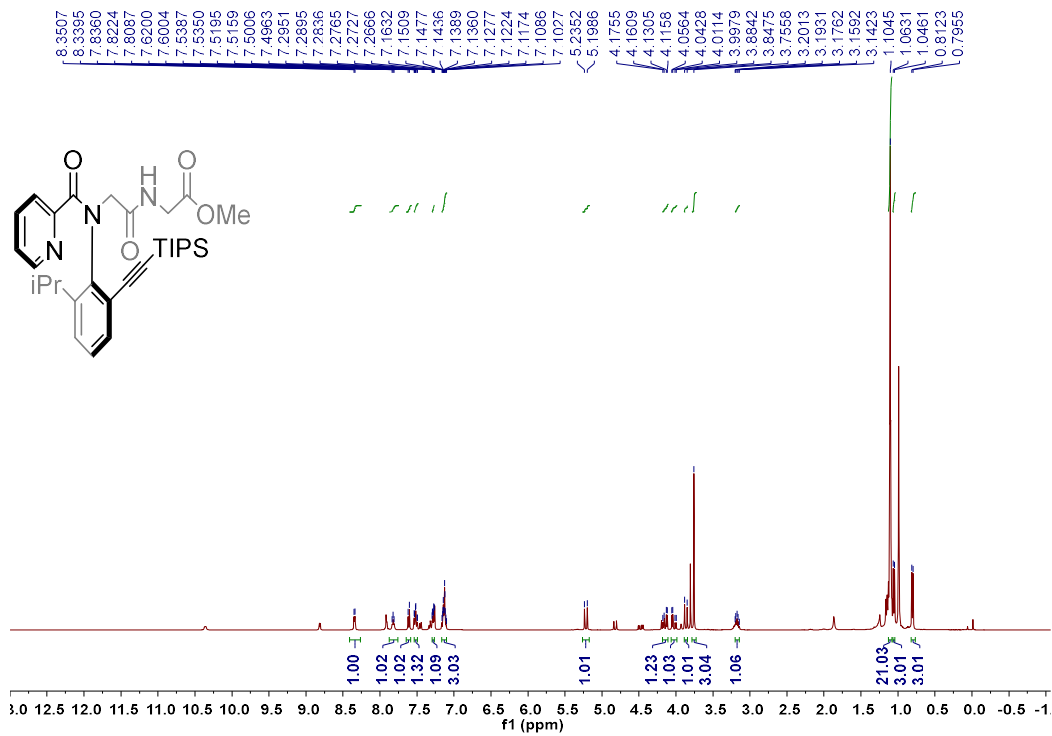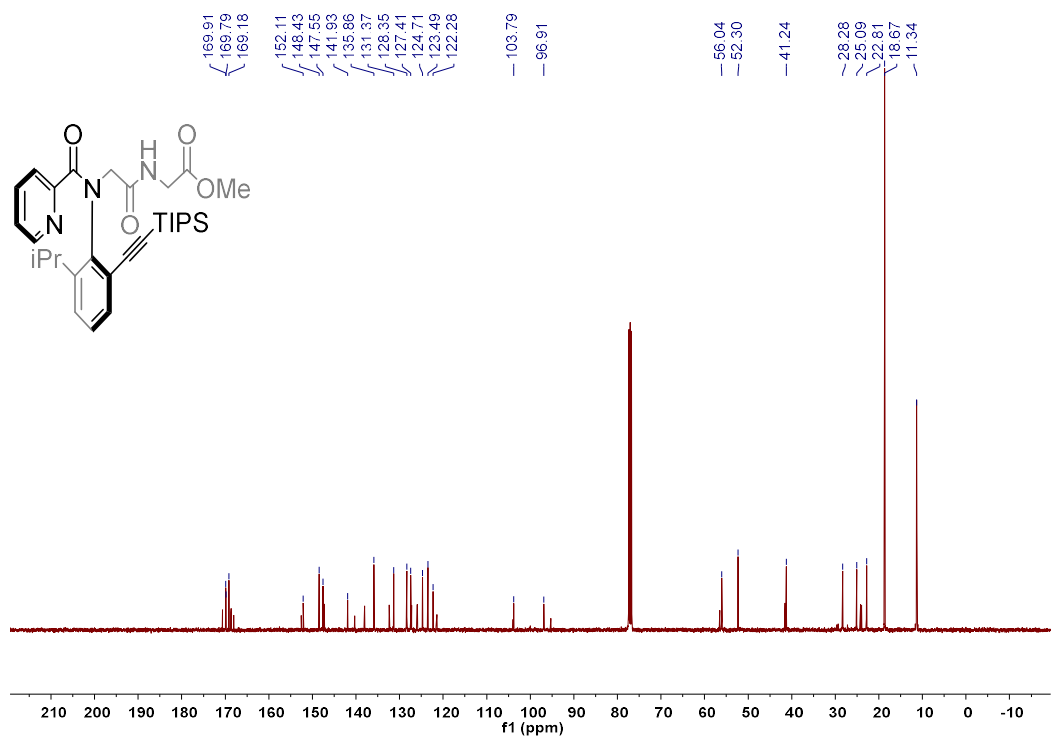

3d

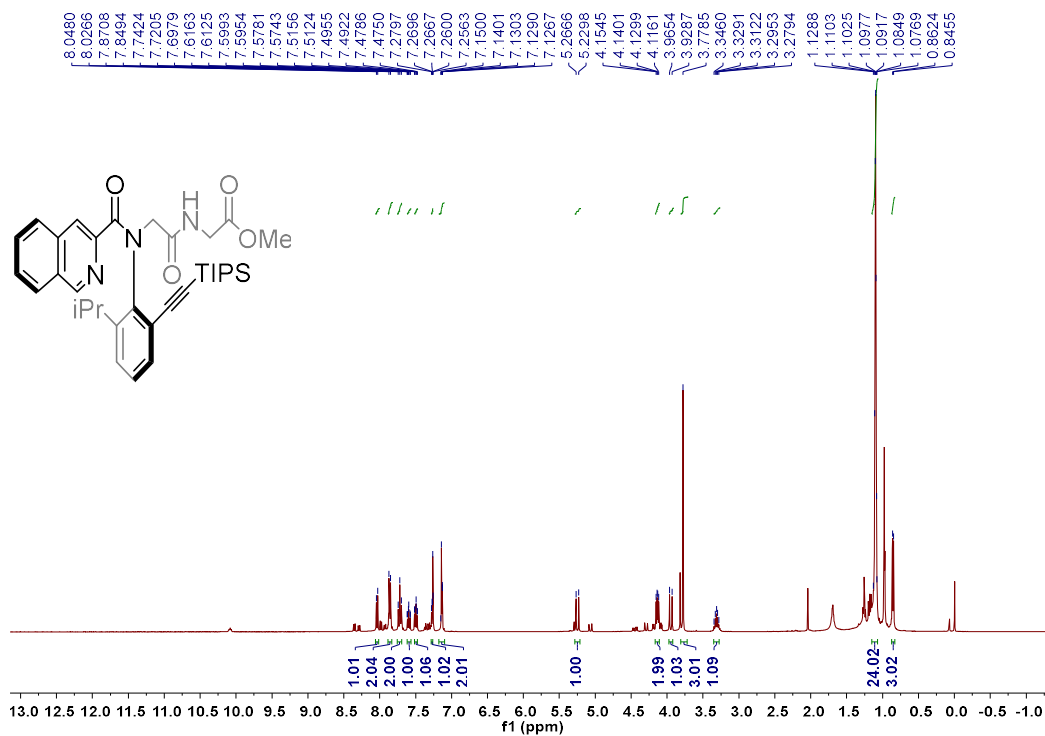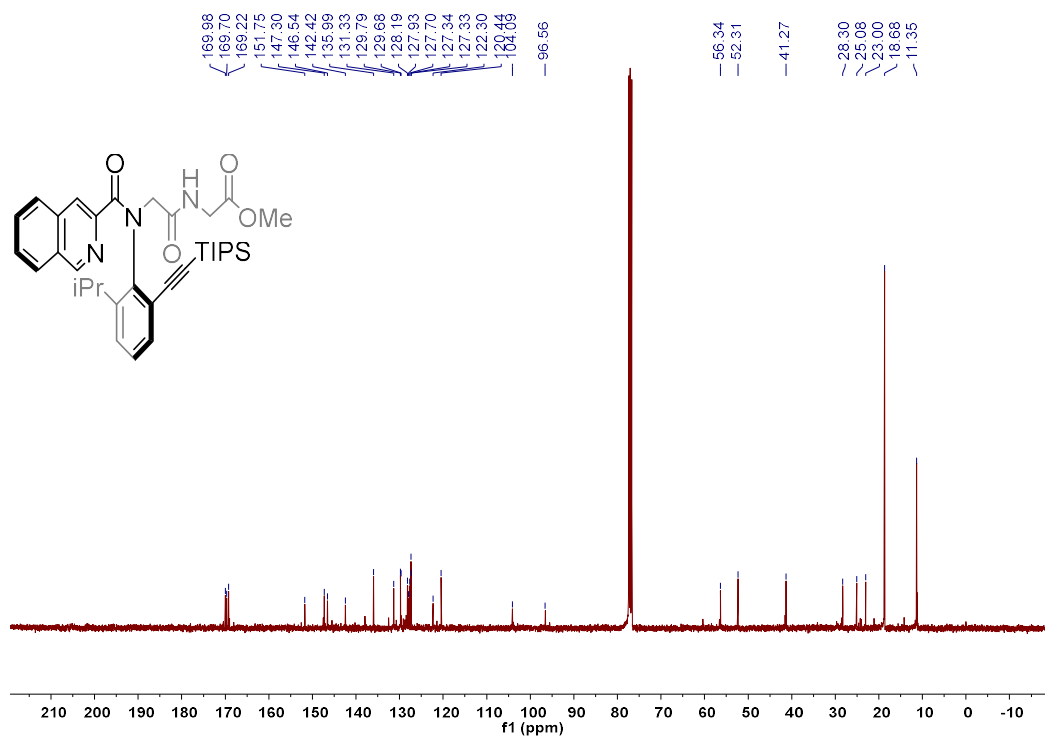



3e

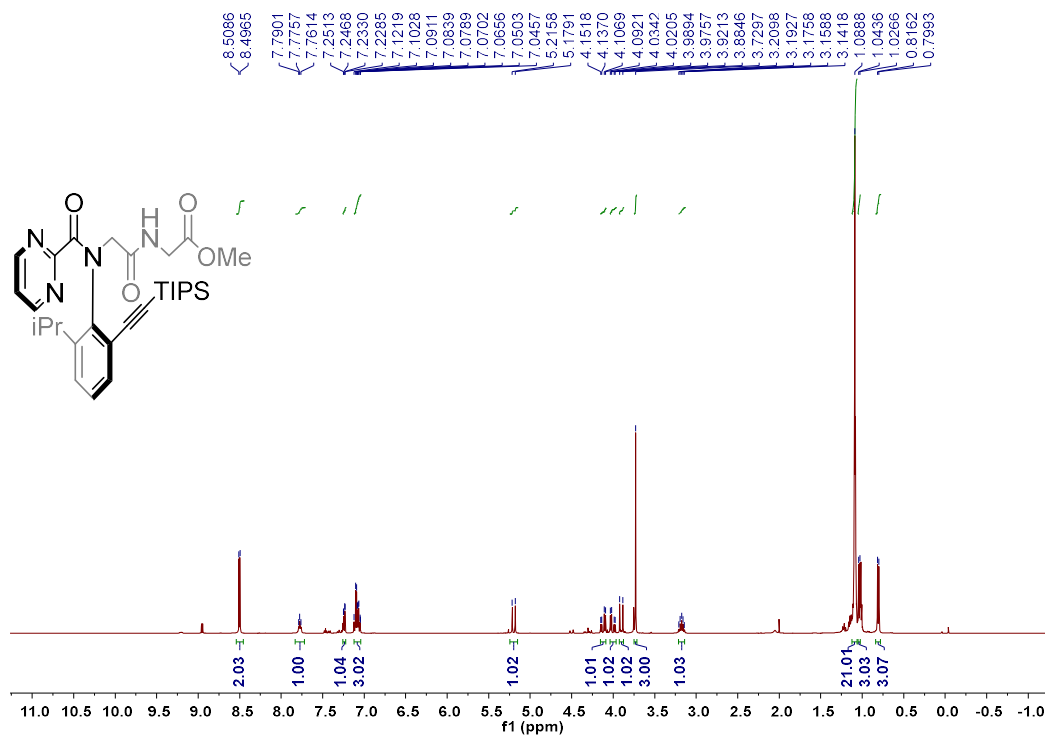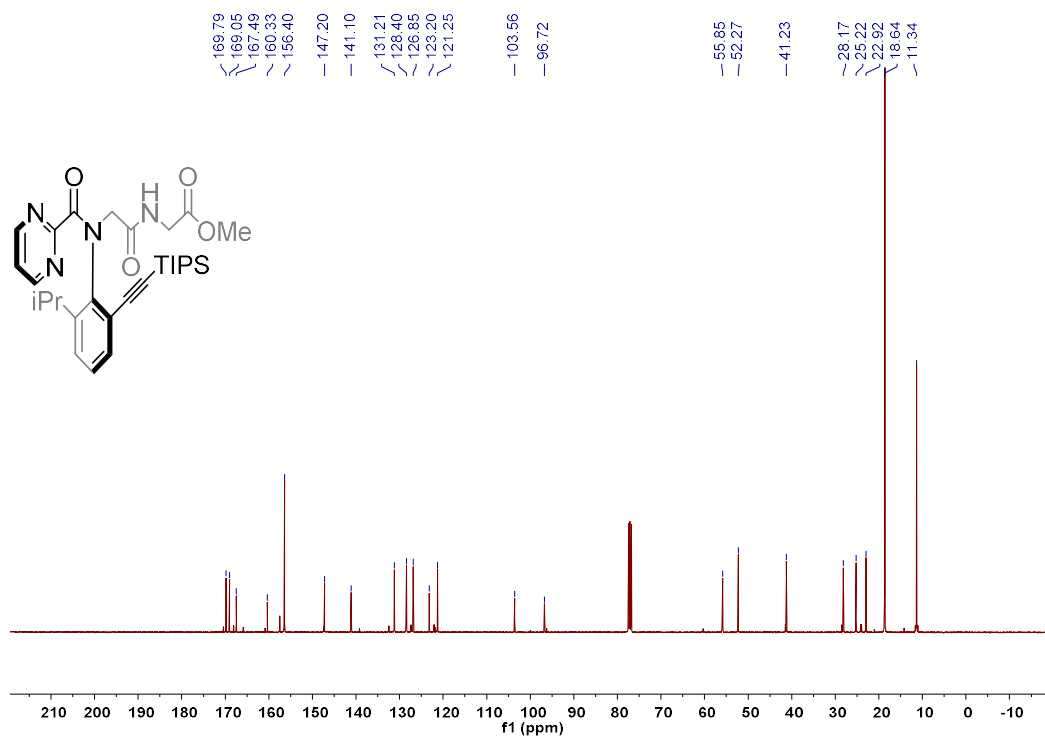

3f

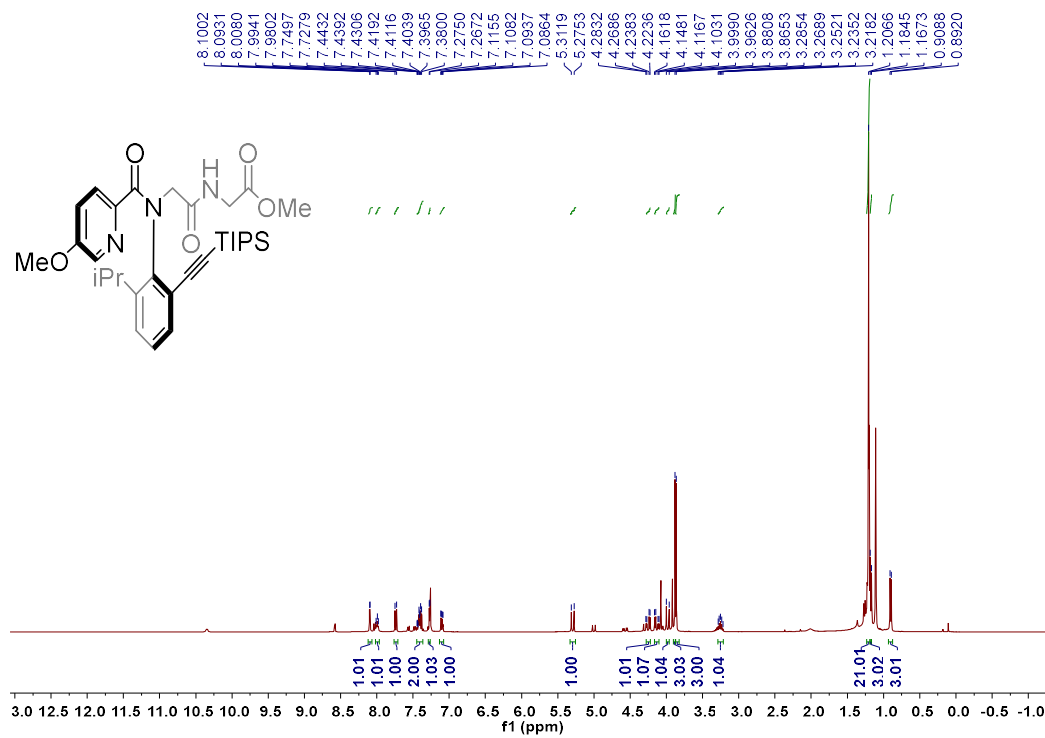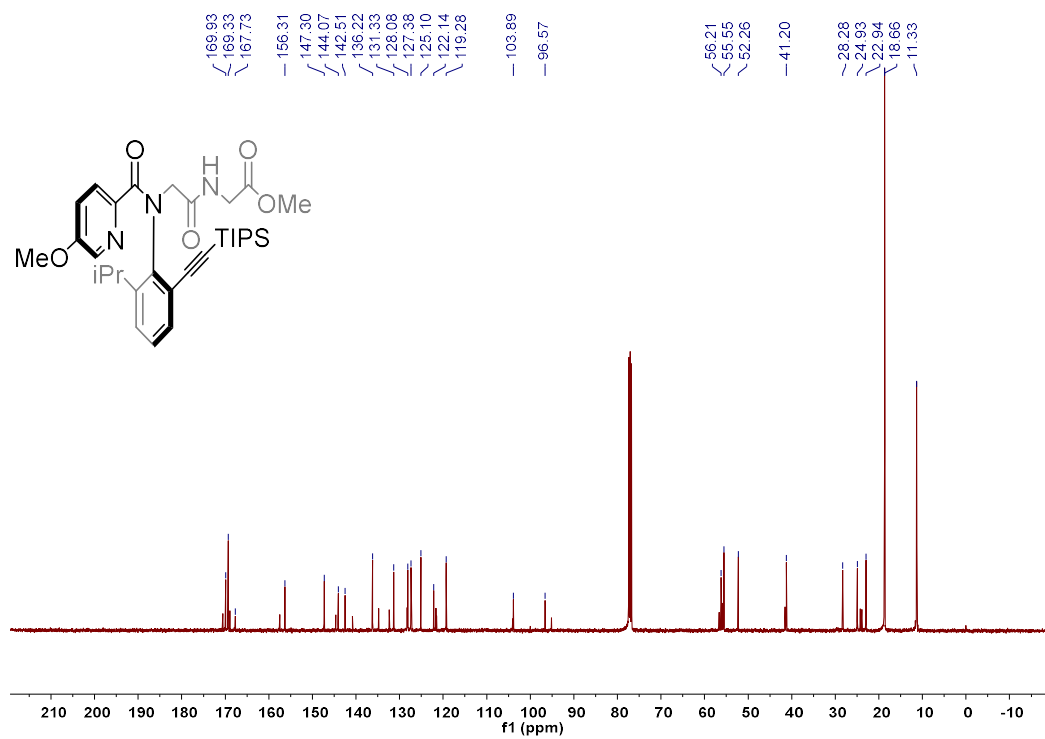

3g

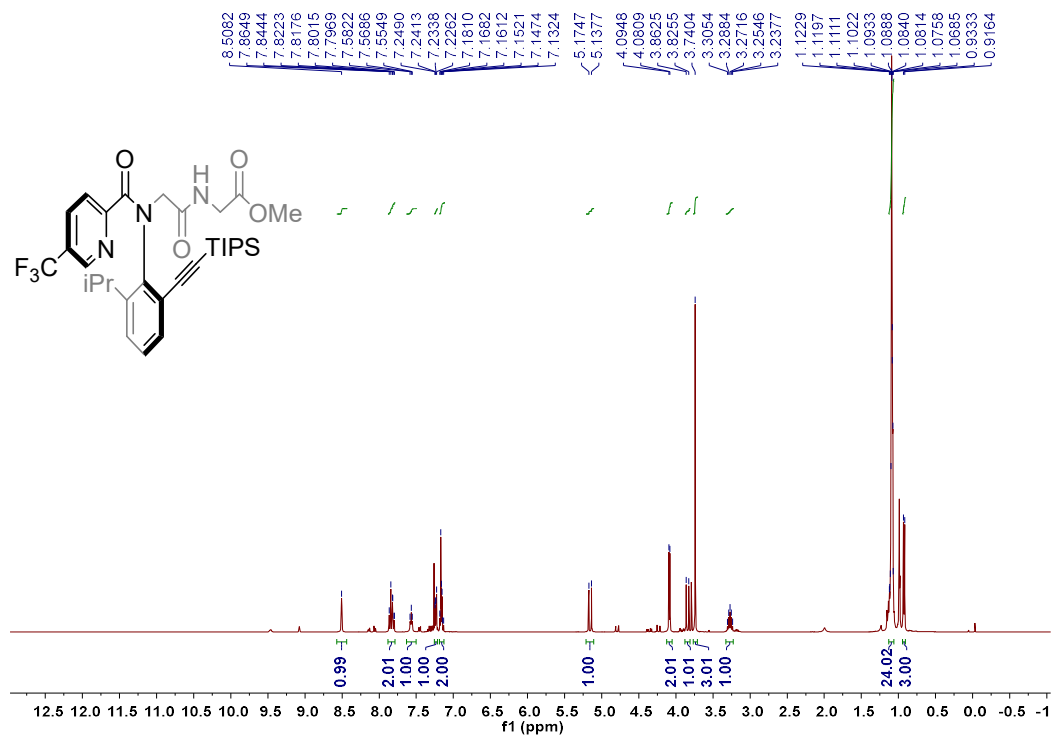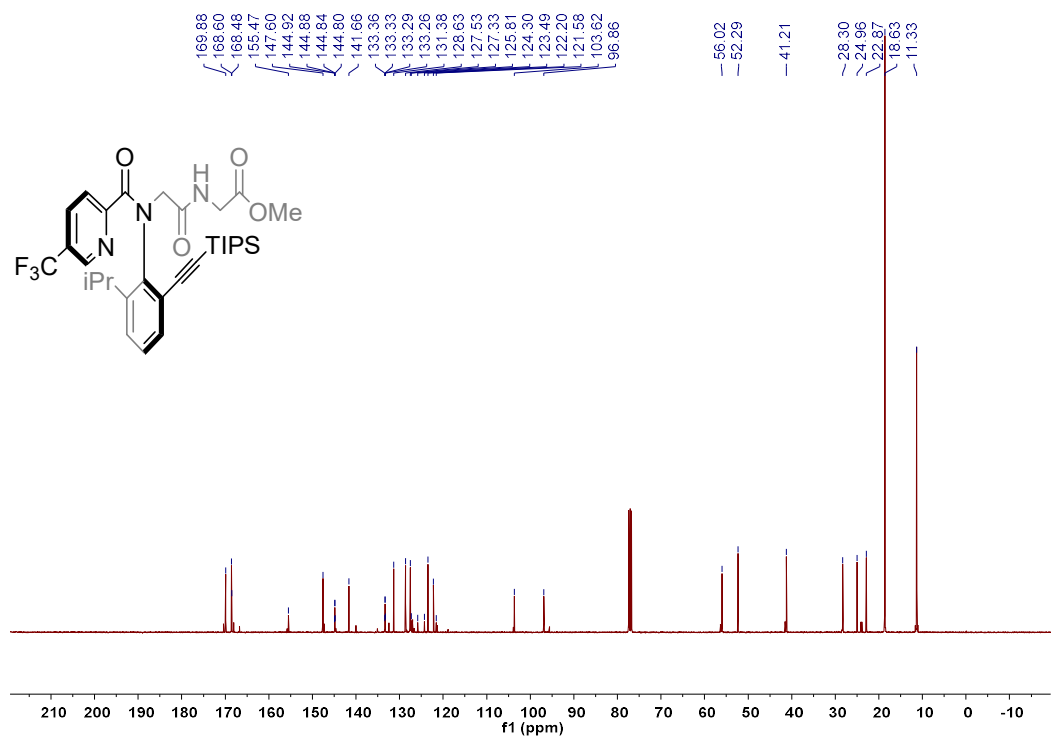

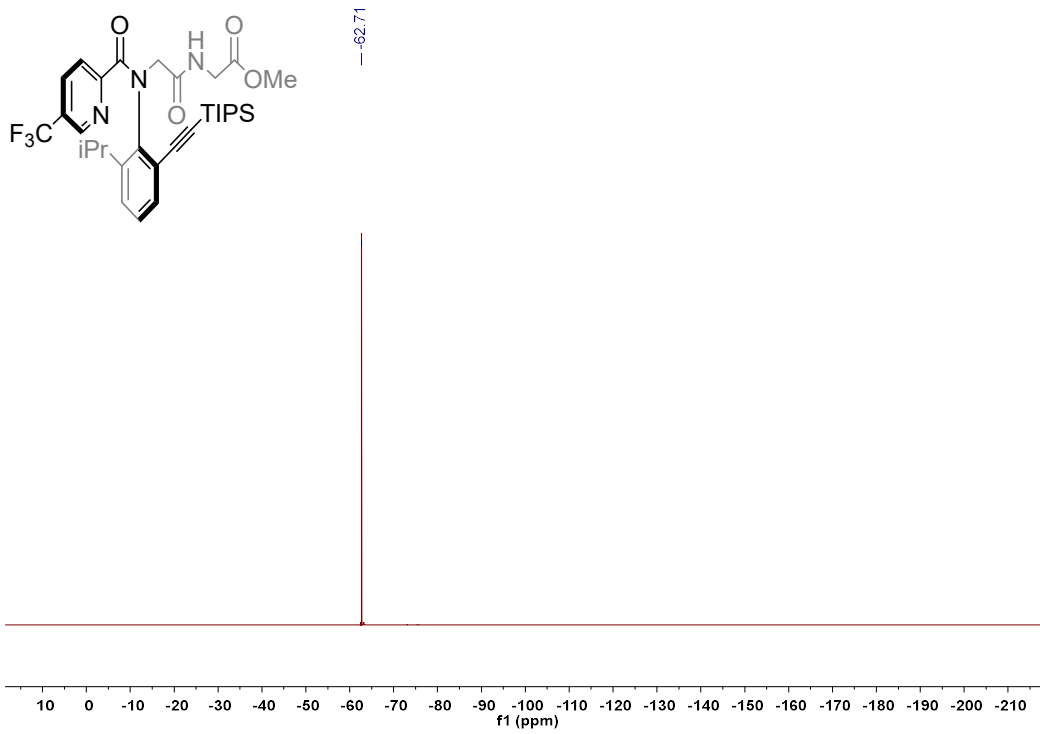

3h

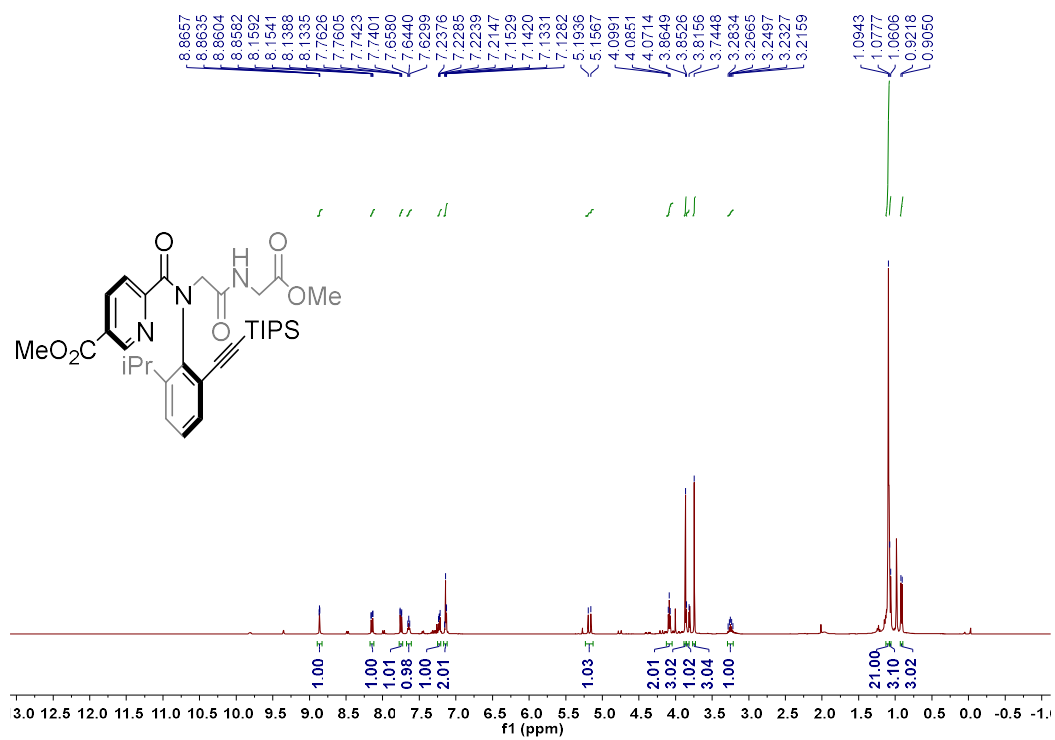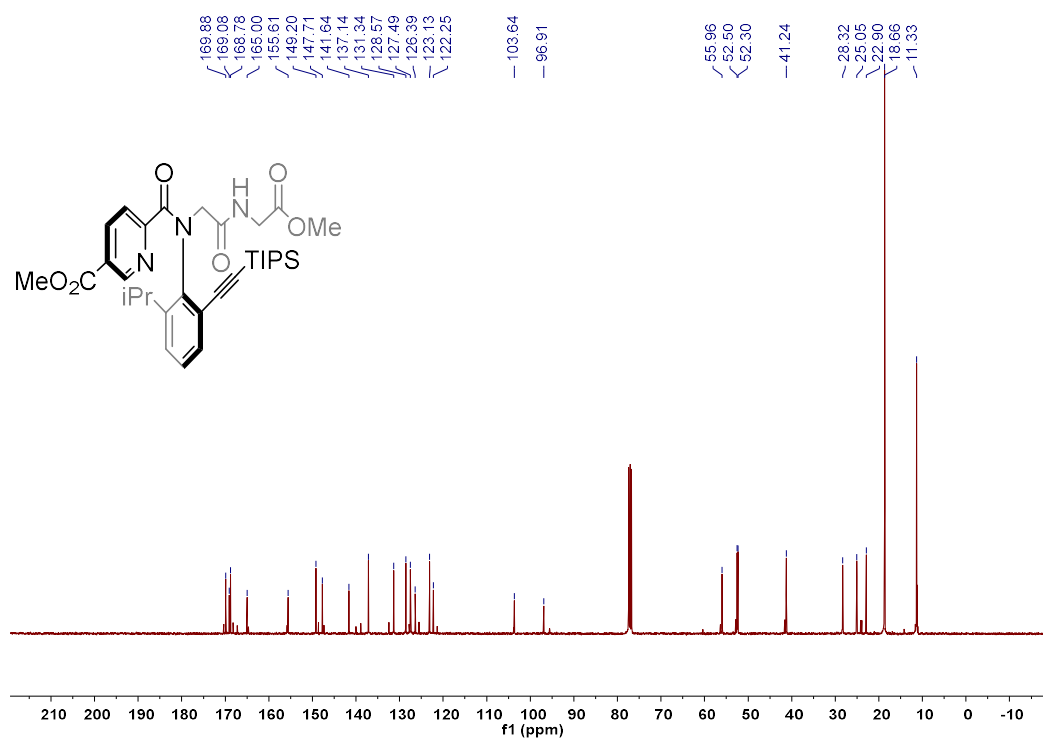

3i

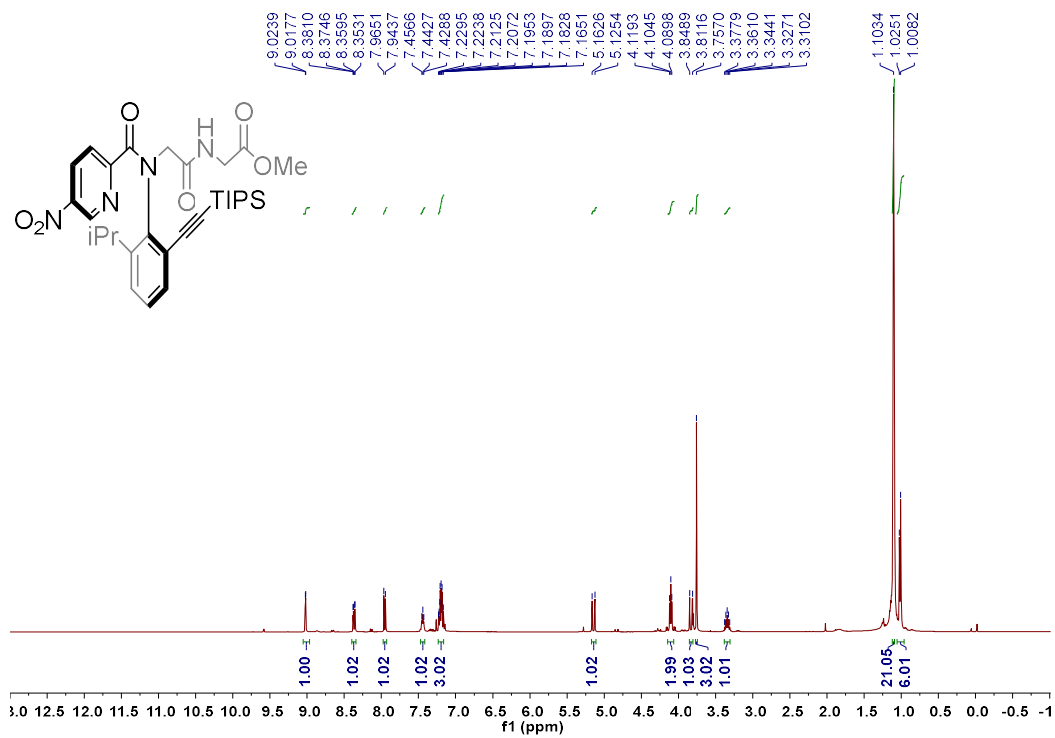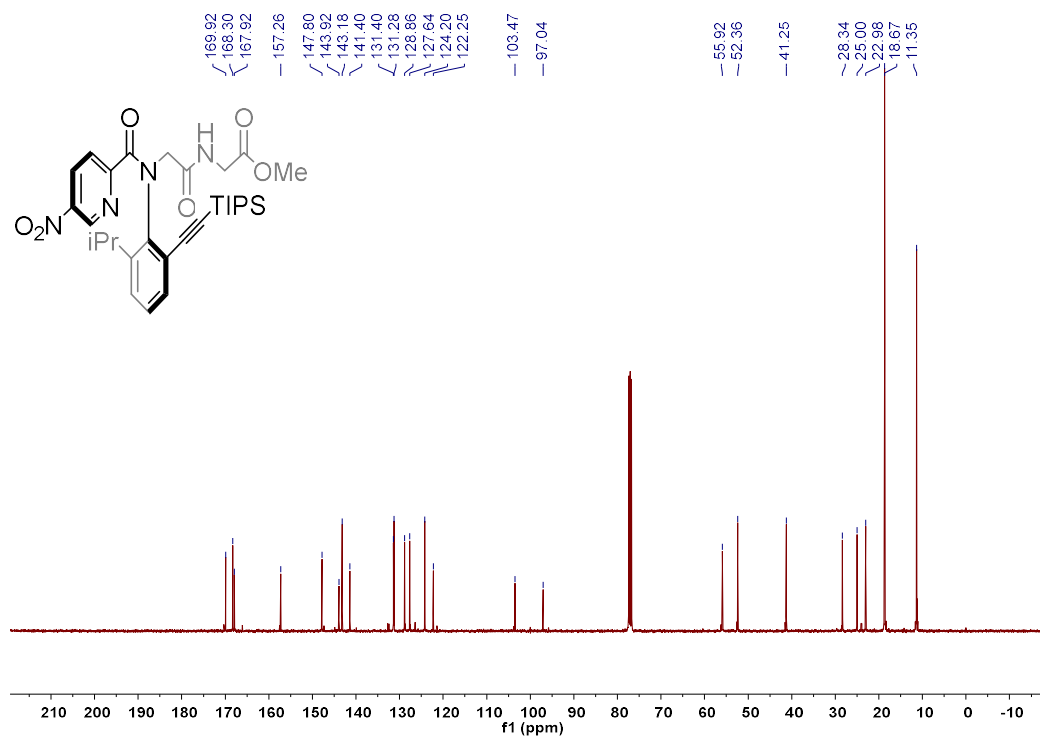

3j

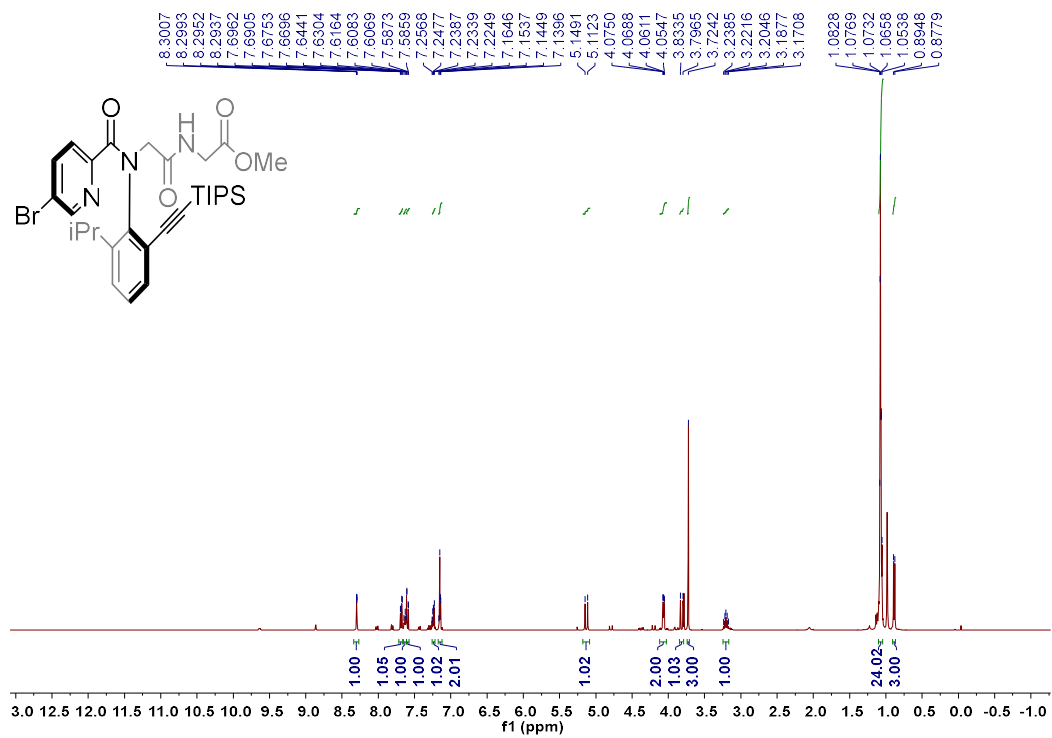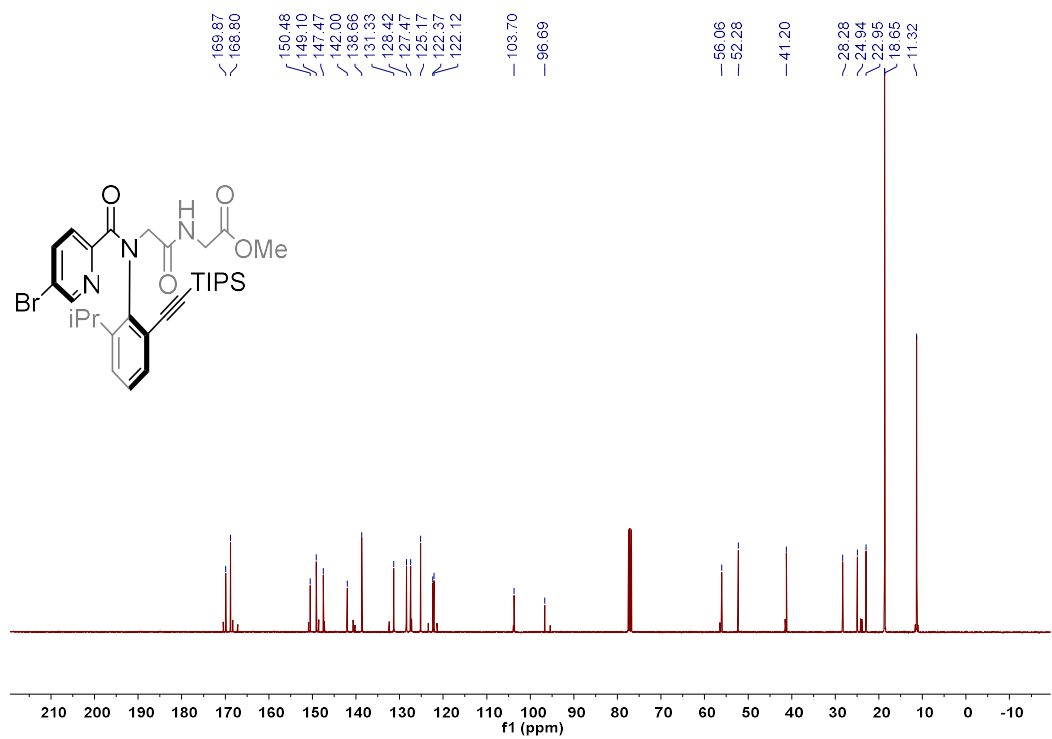

3k

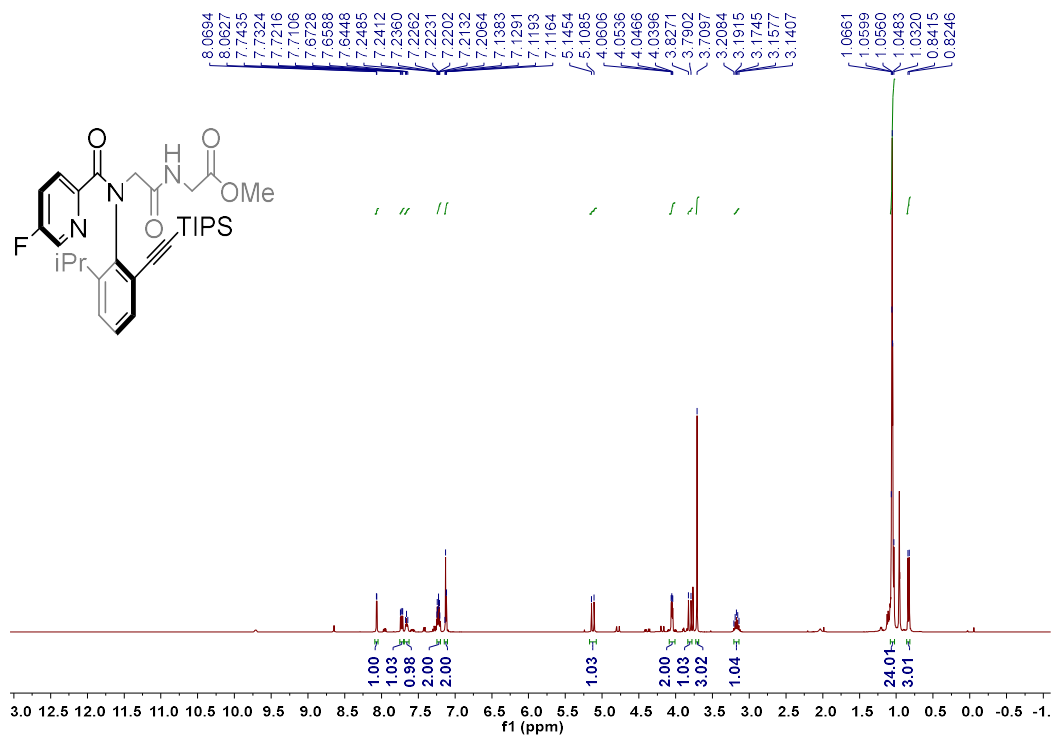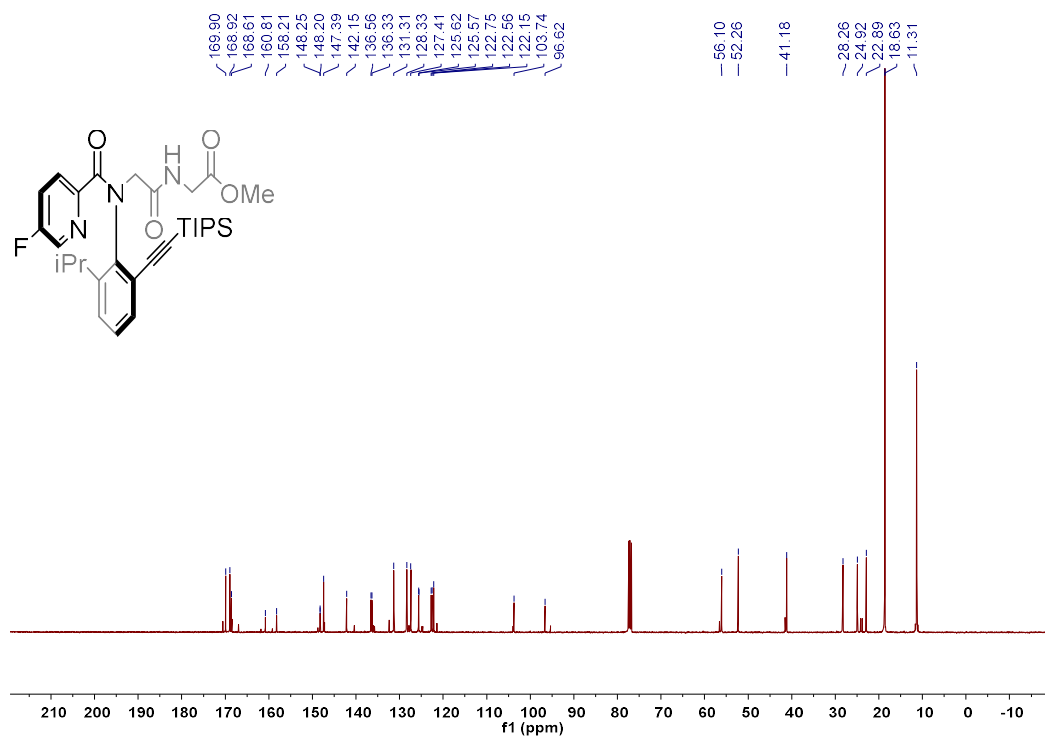



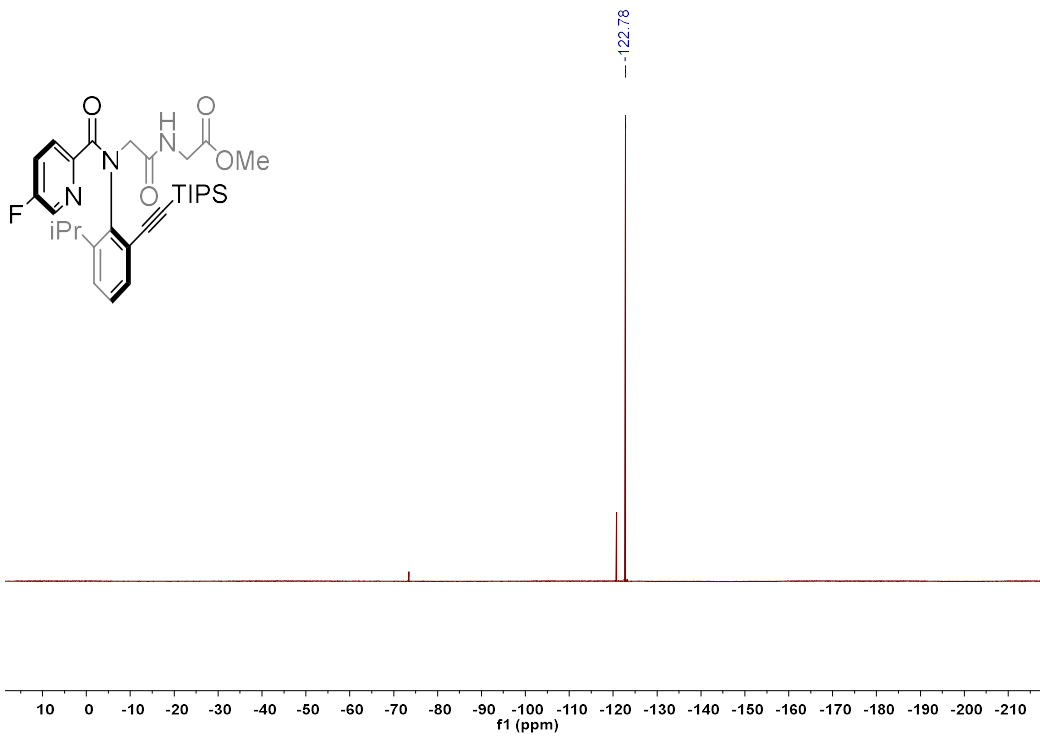

31

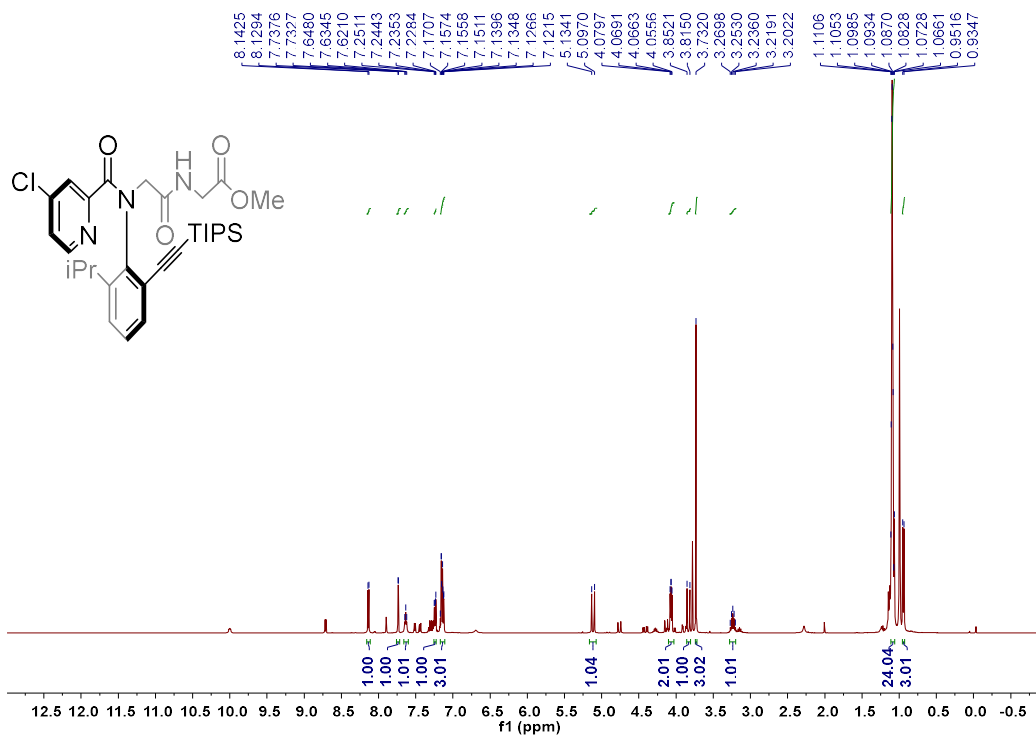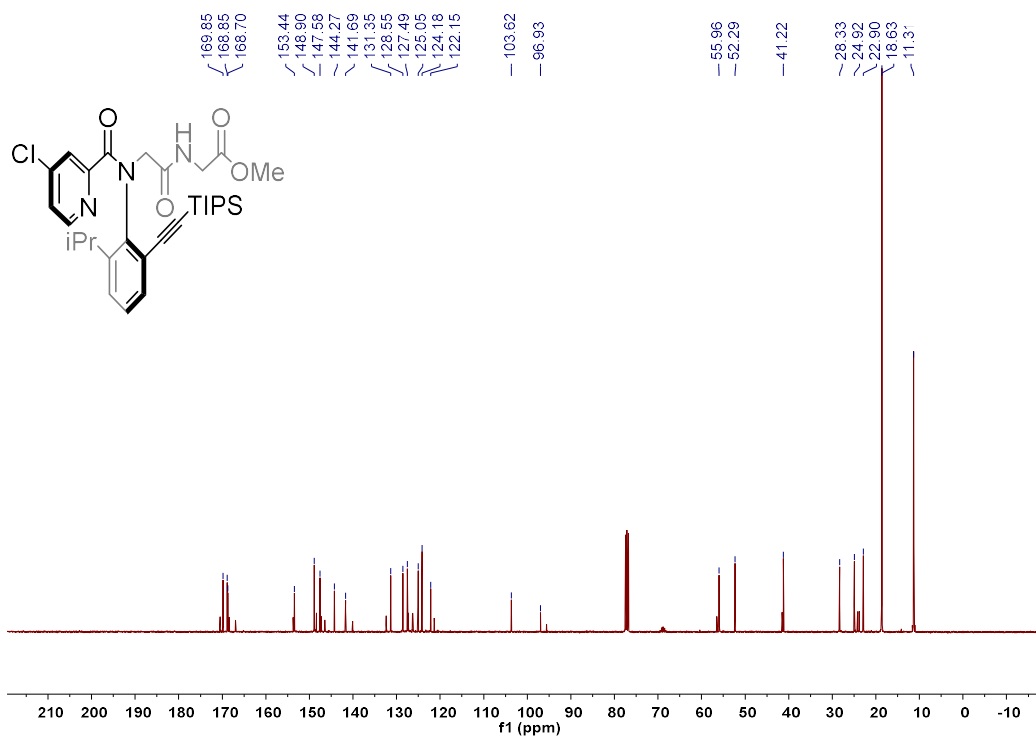

5a

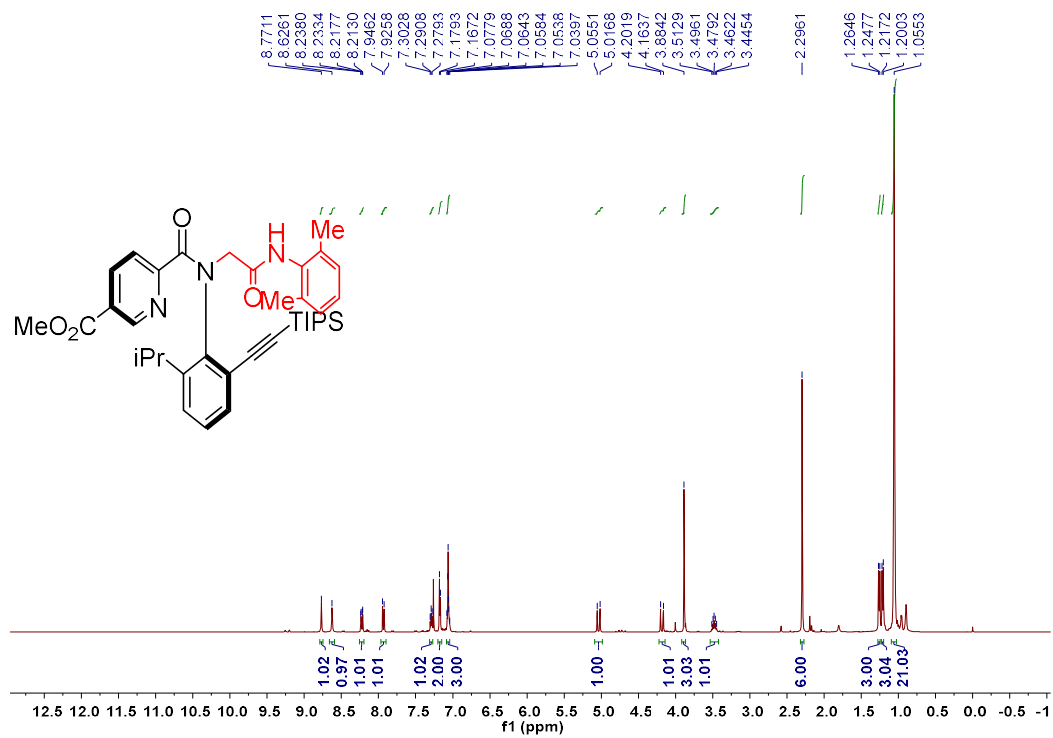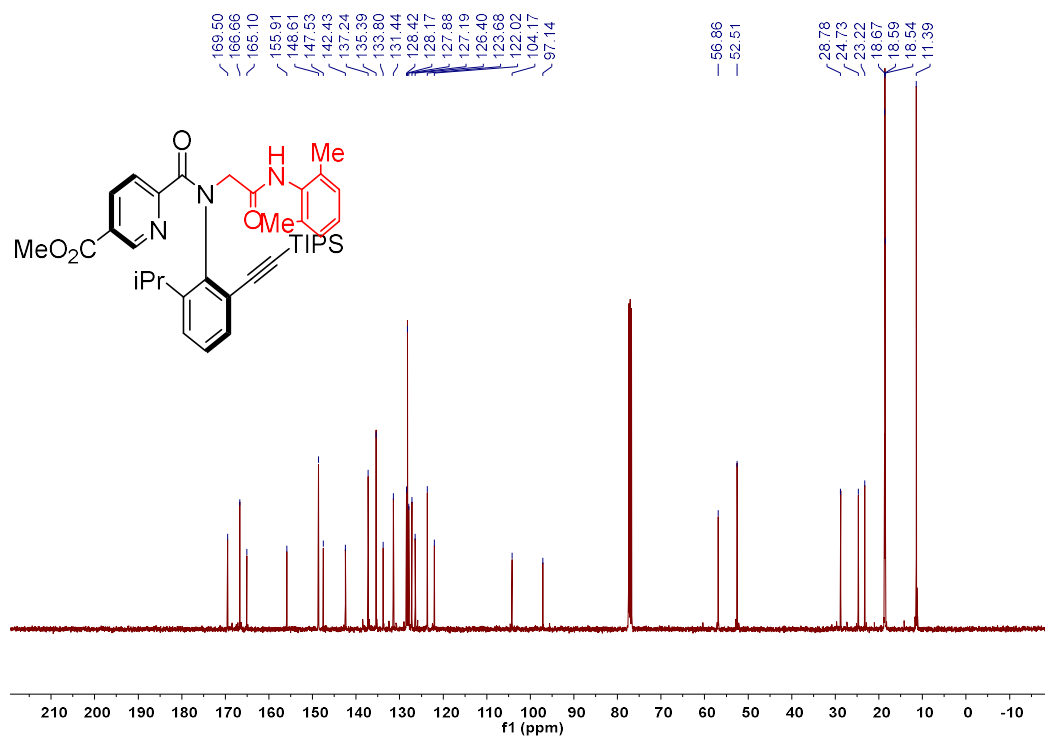

5b

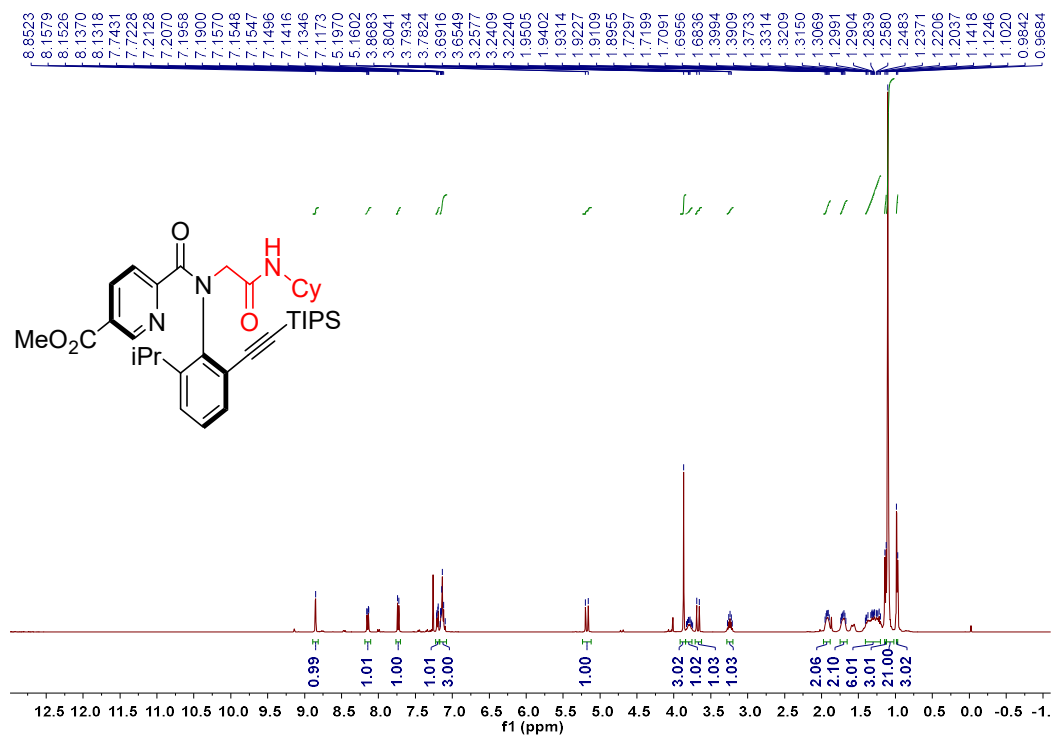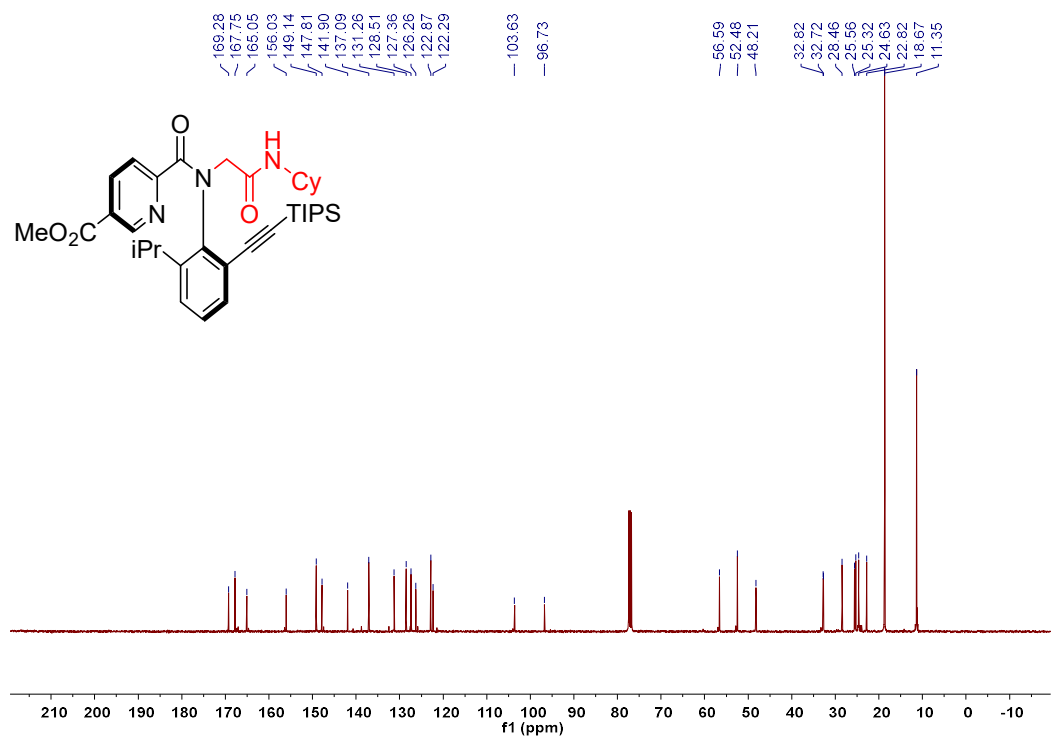

5c

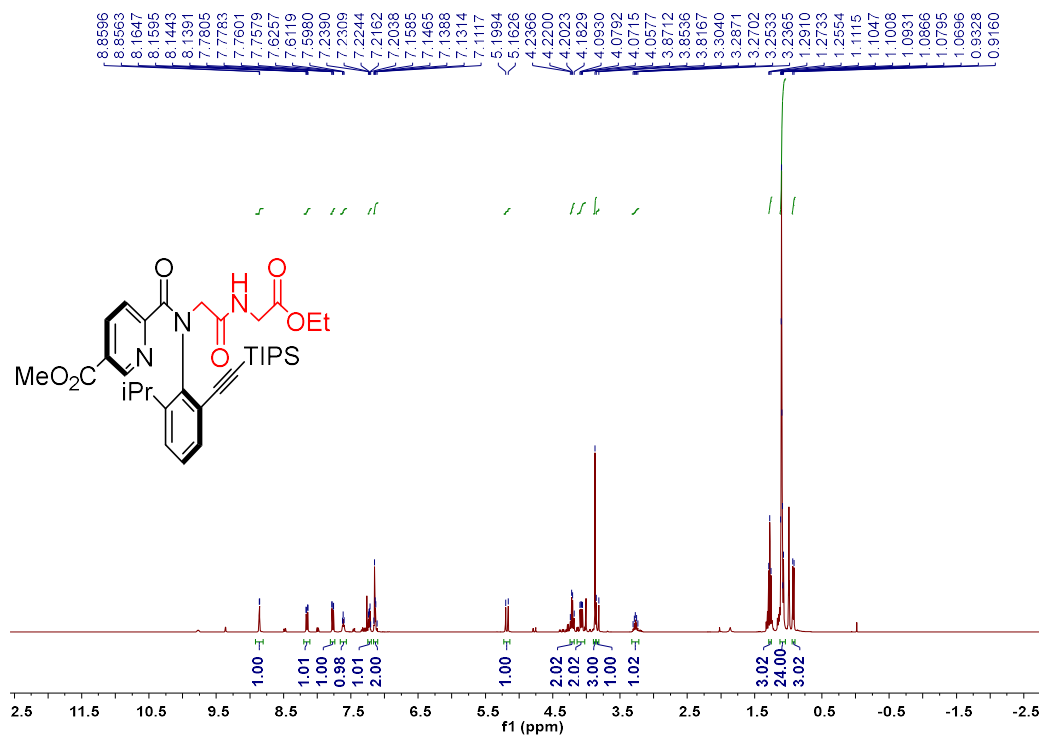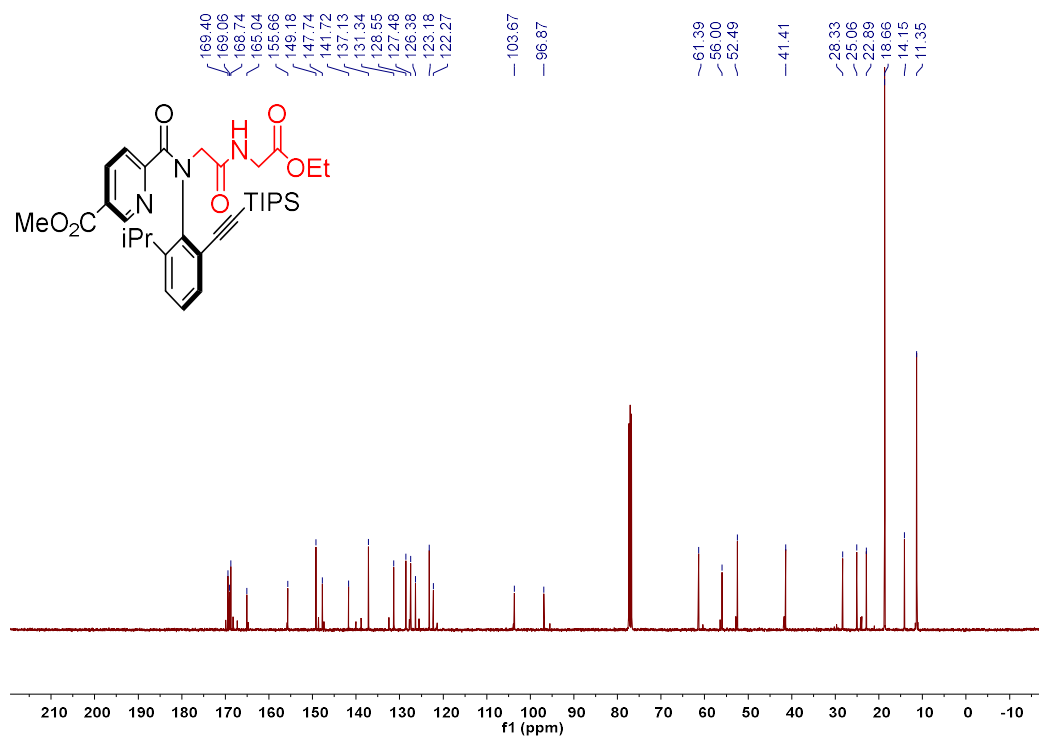

5d

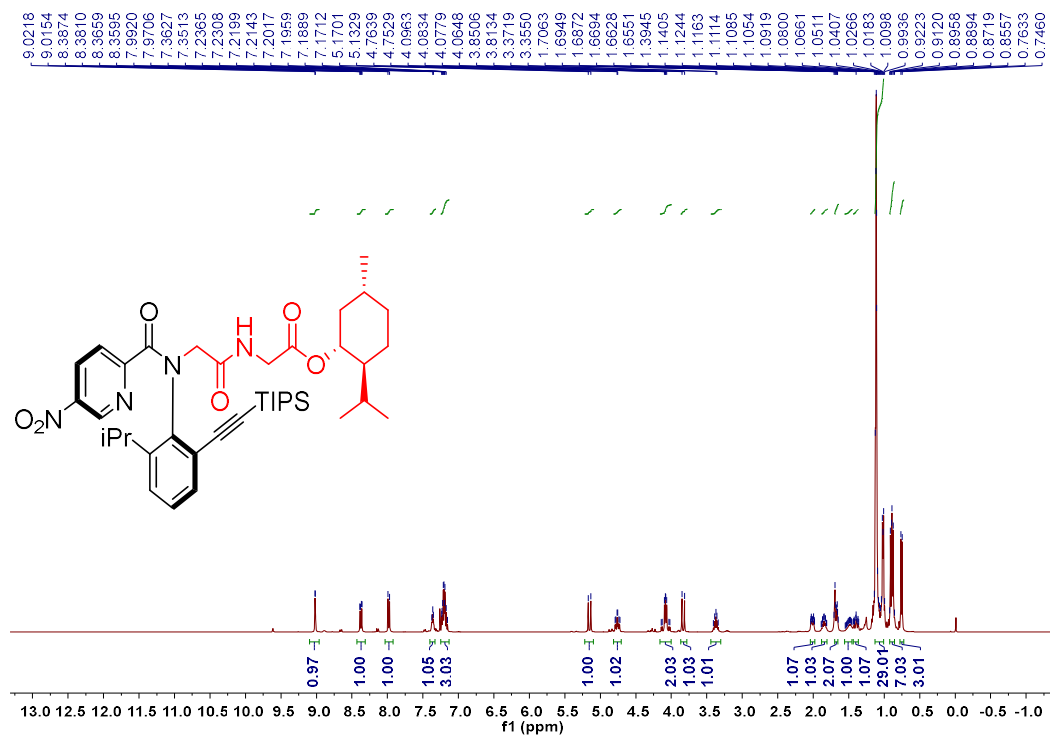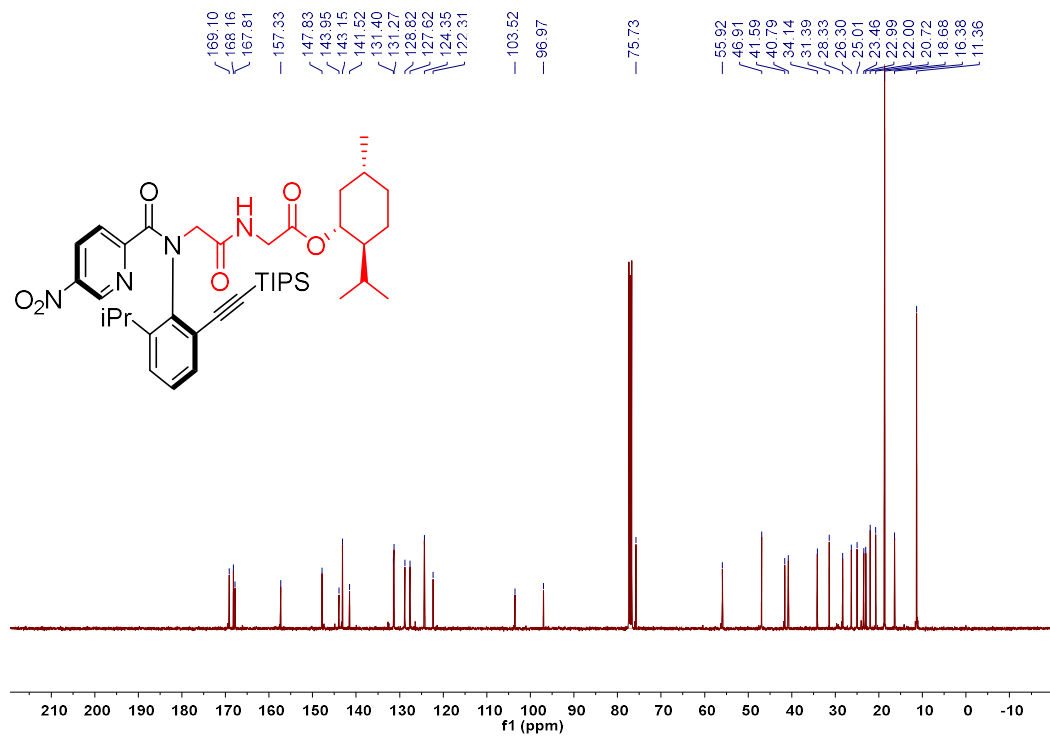

5e

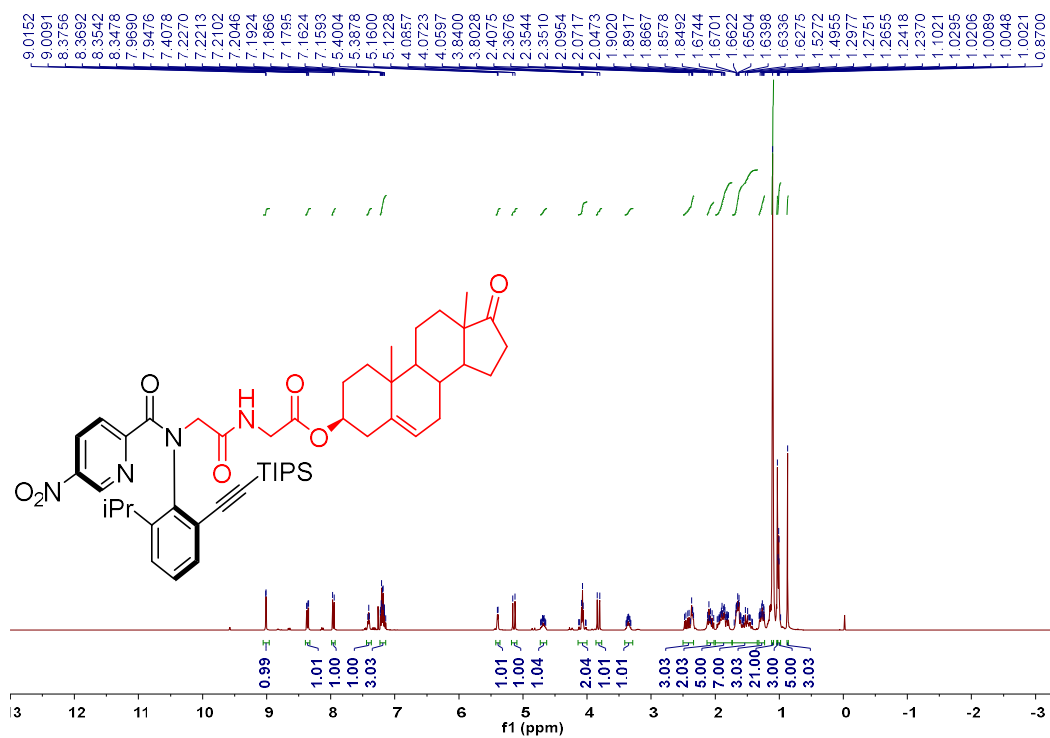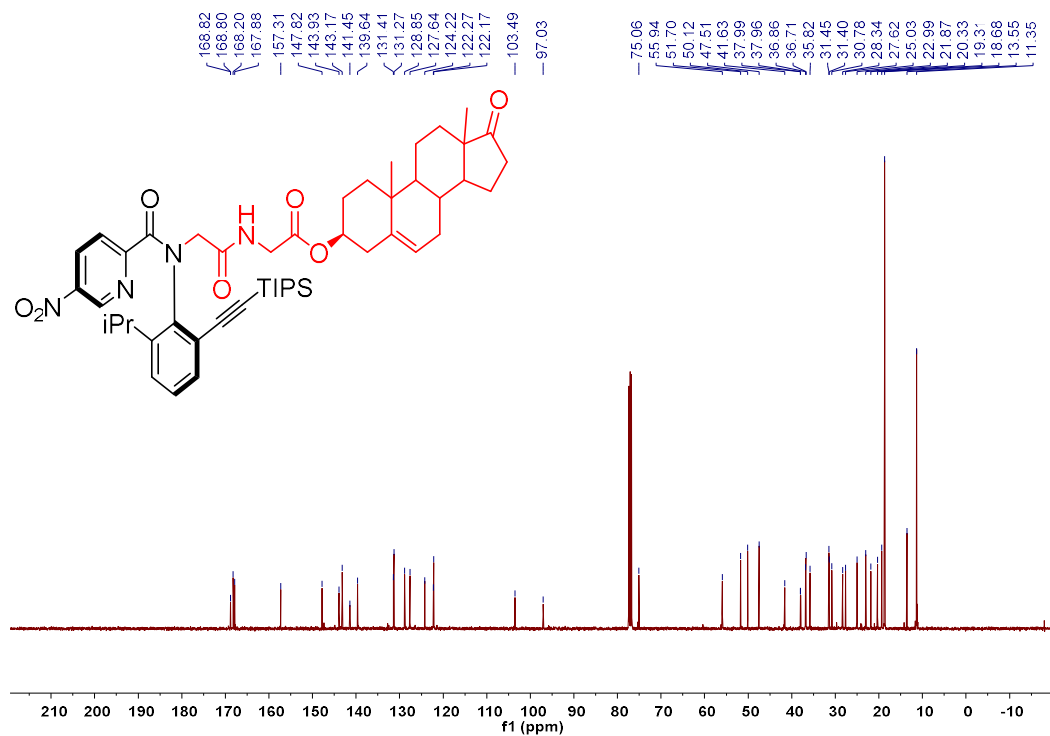

5f

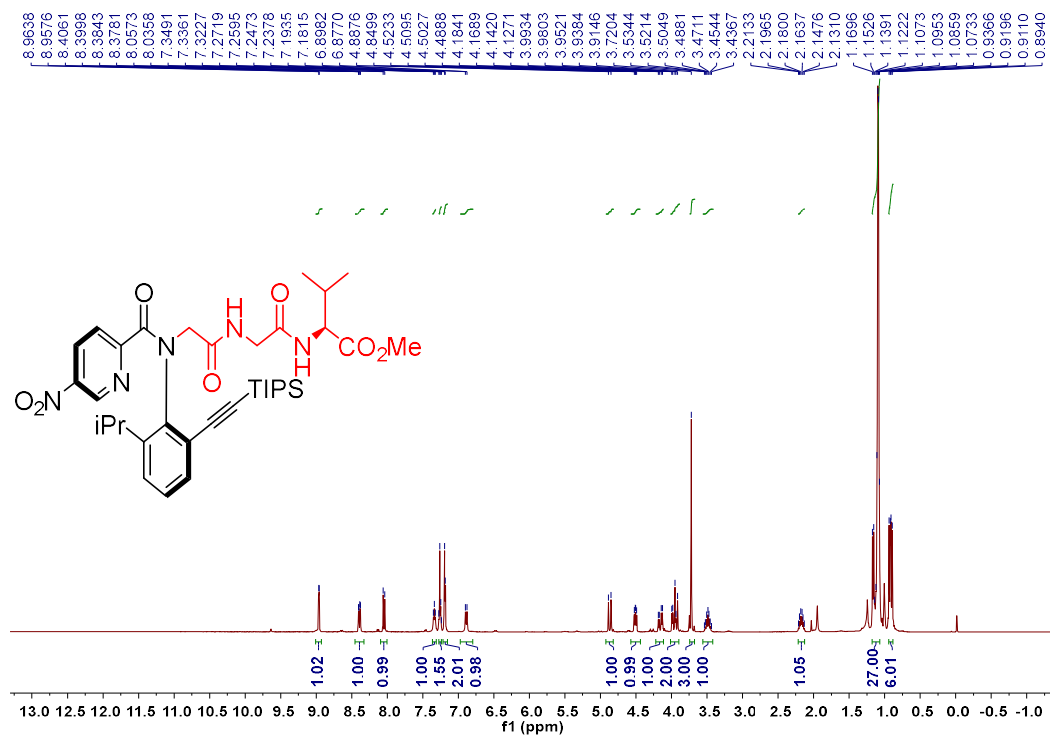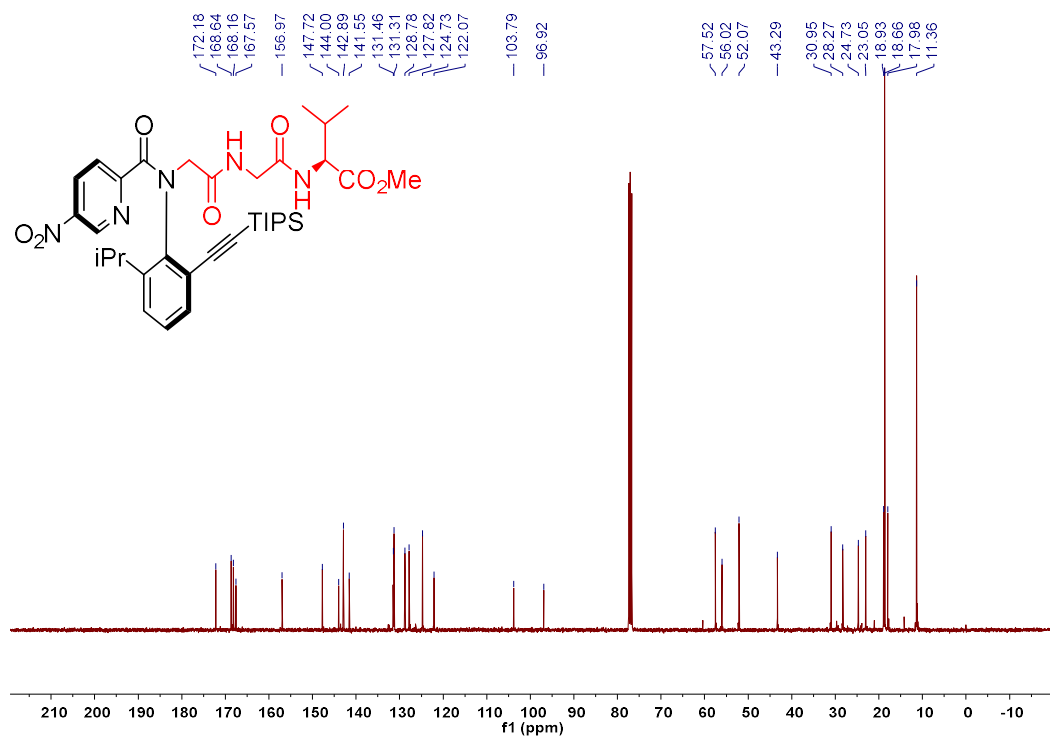



5g

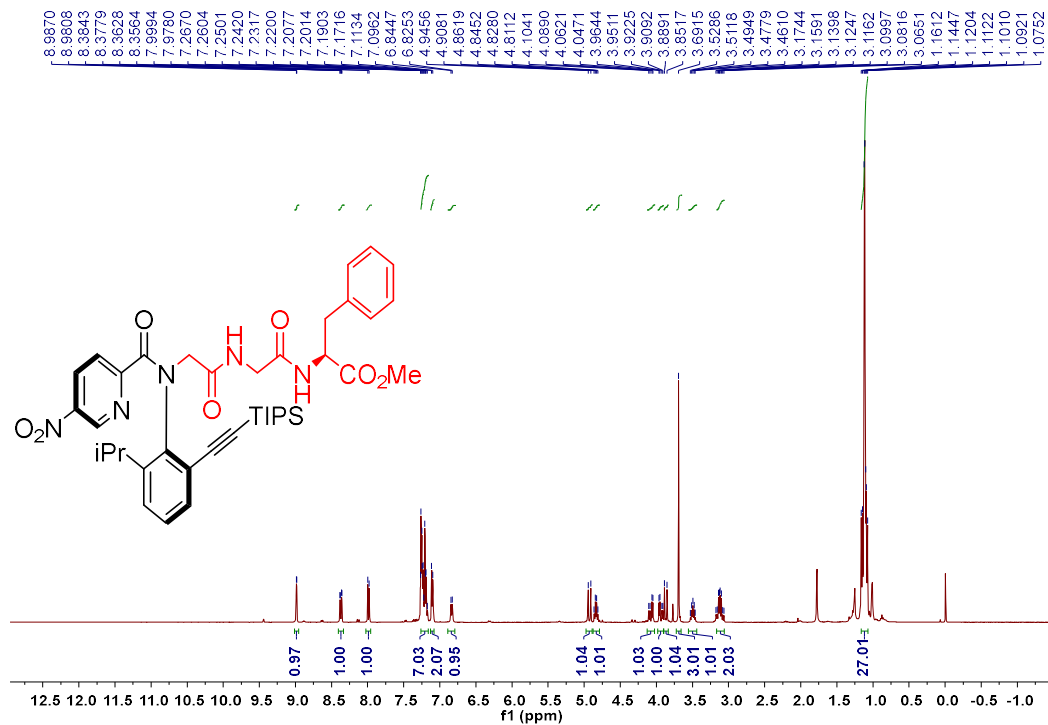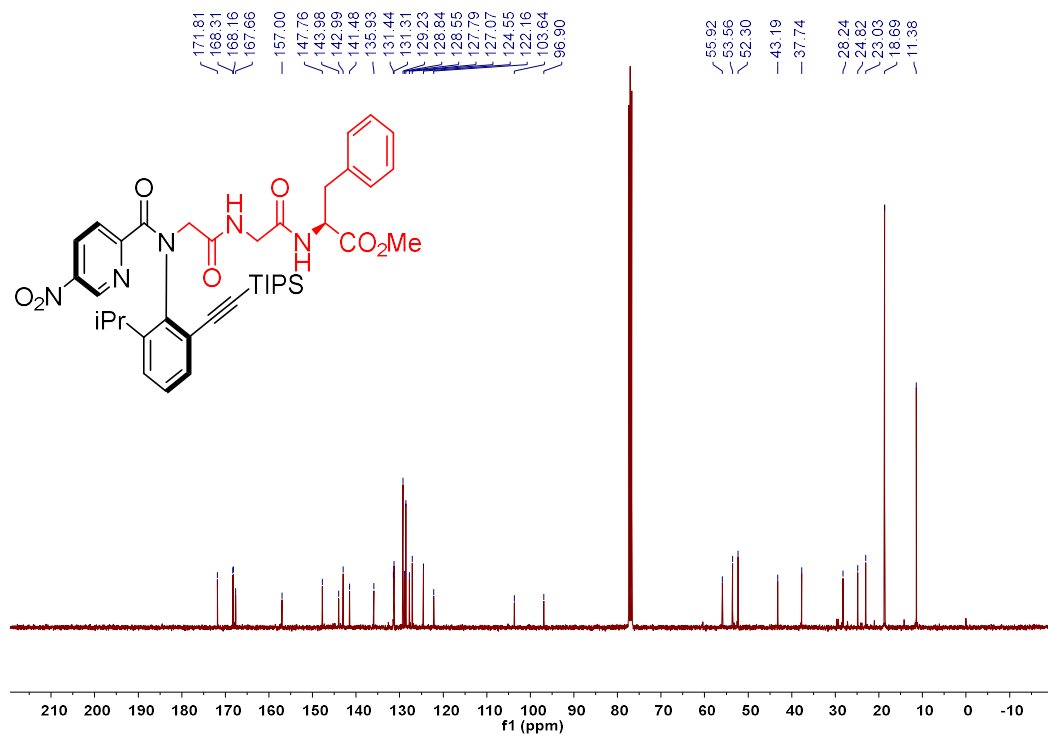

5h

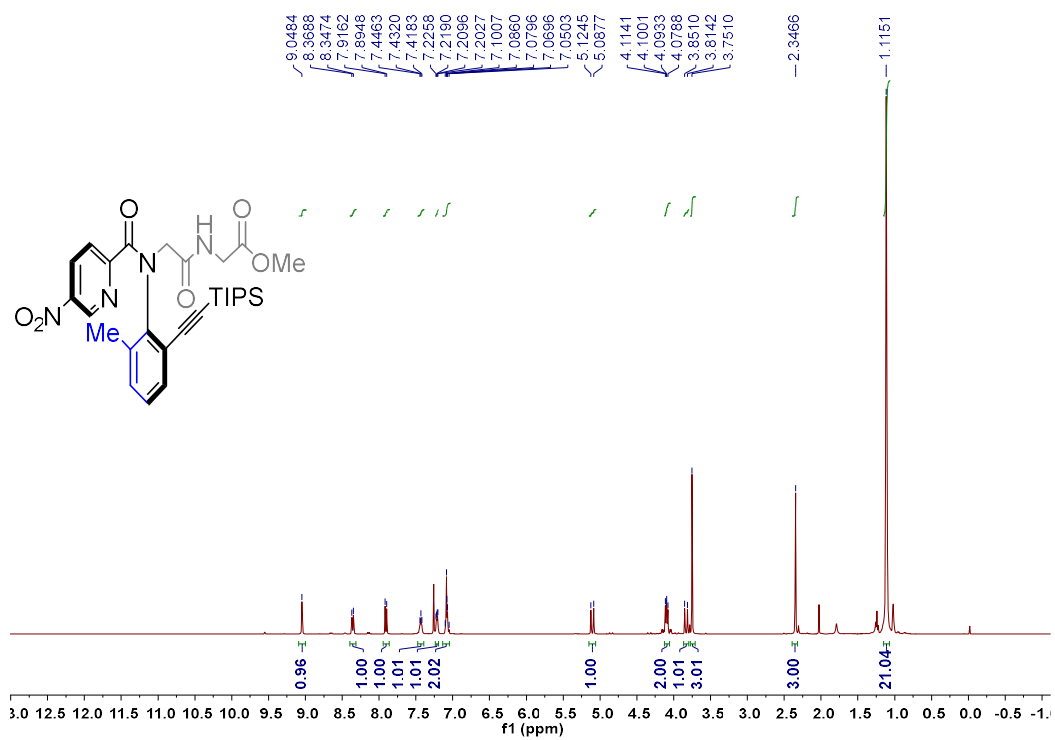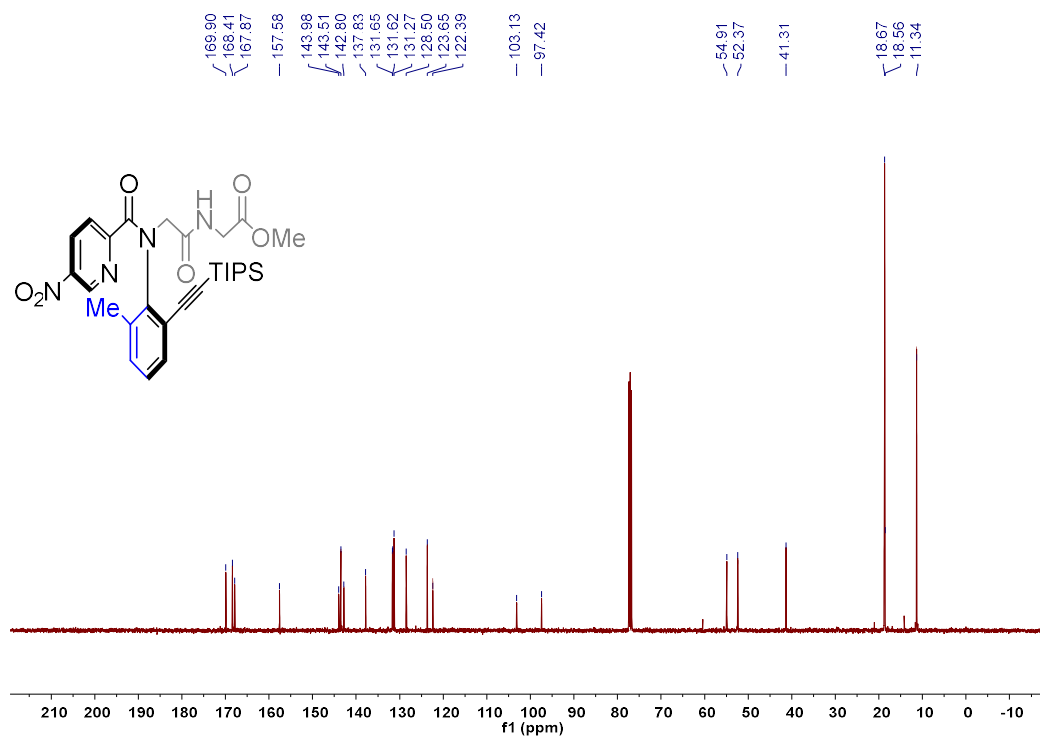

5i

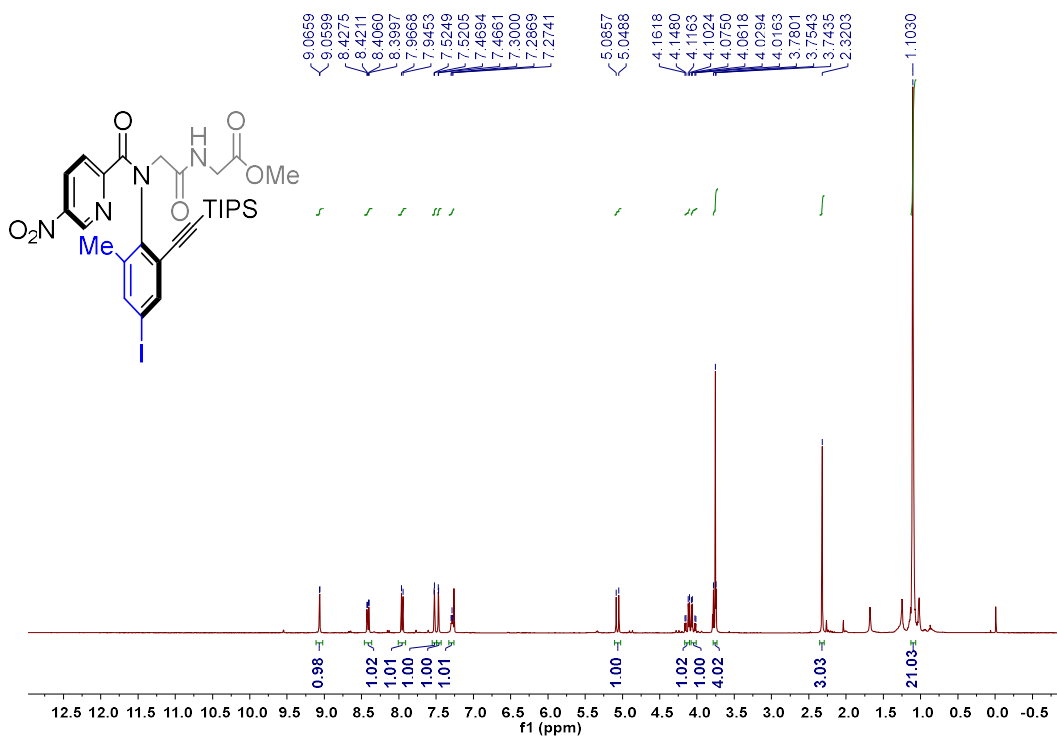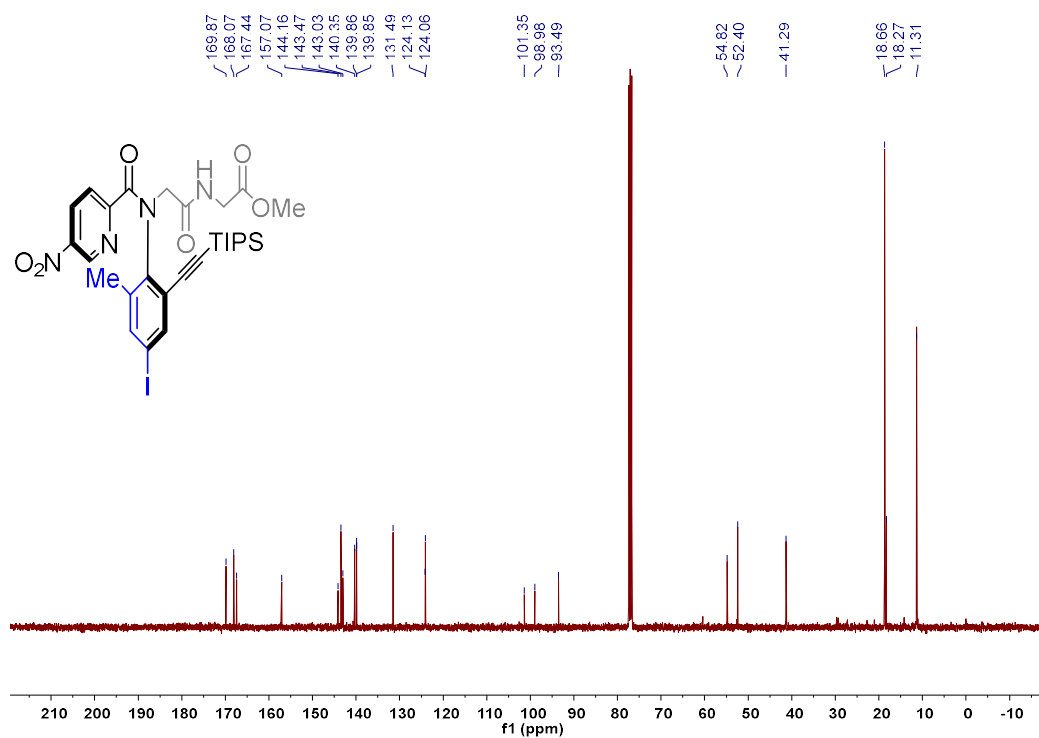

5j

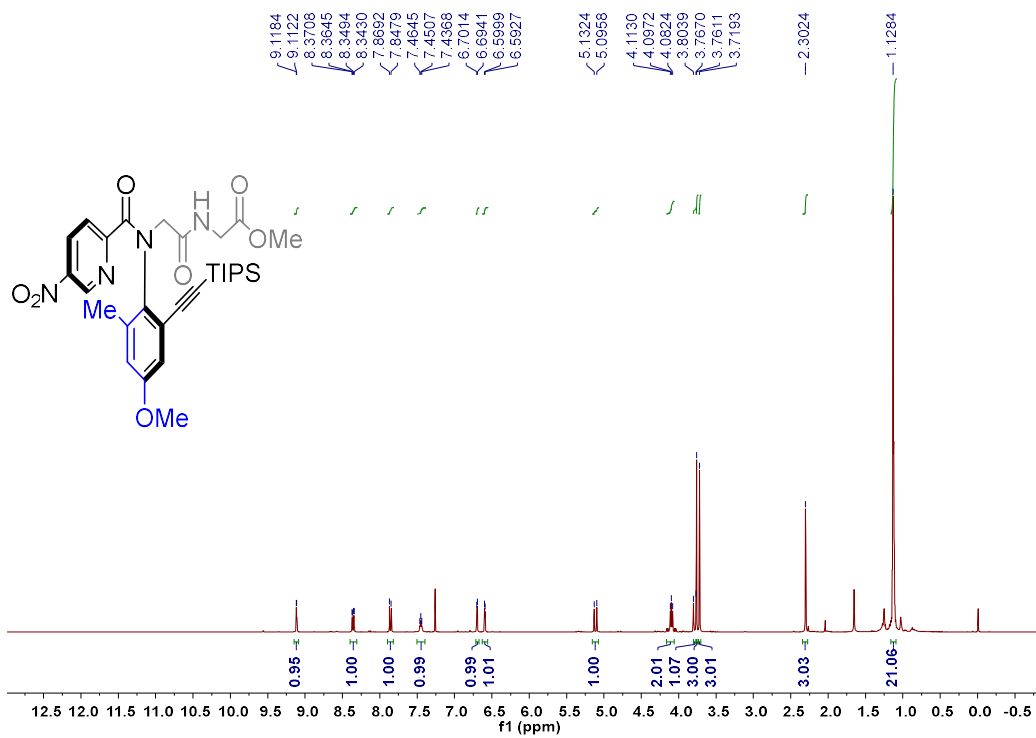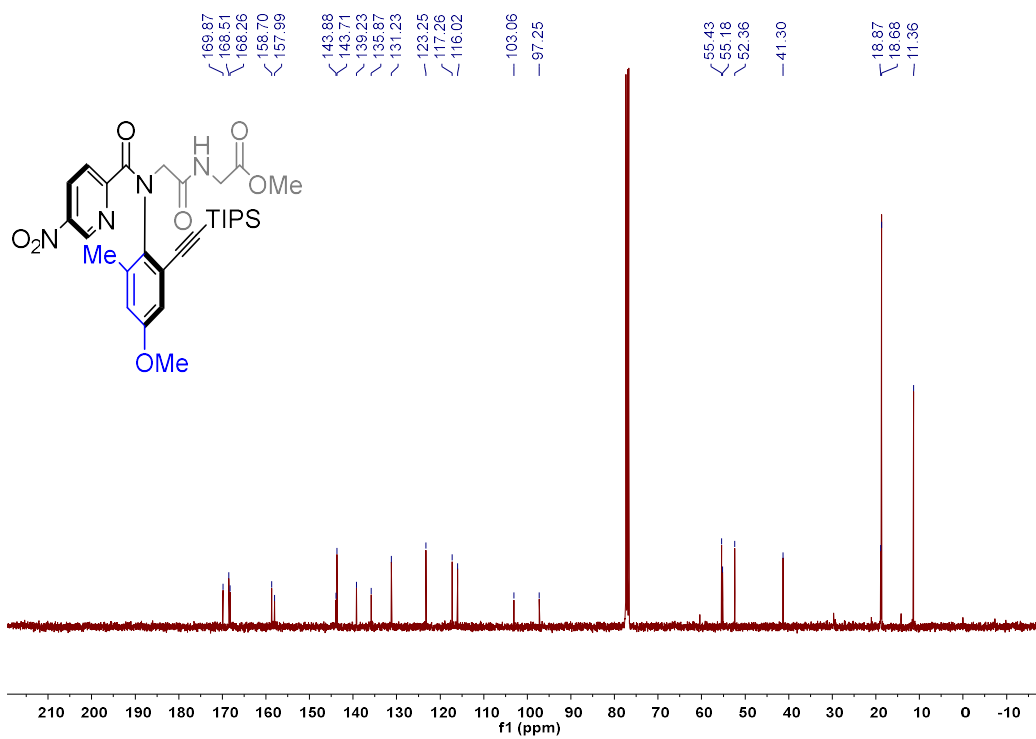

5k

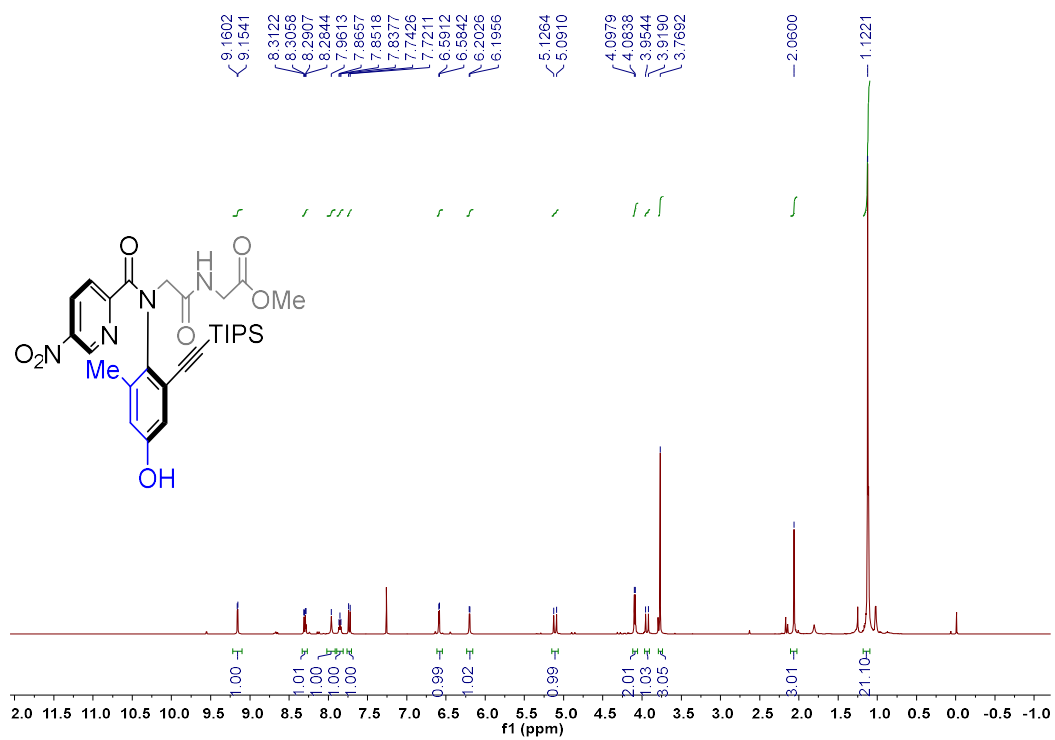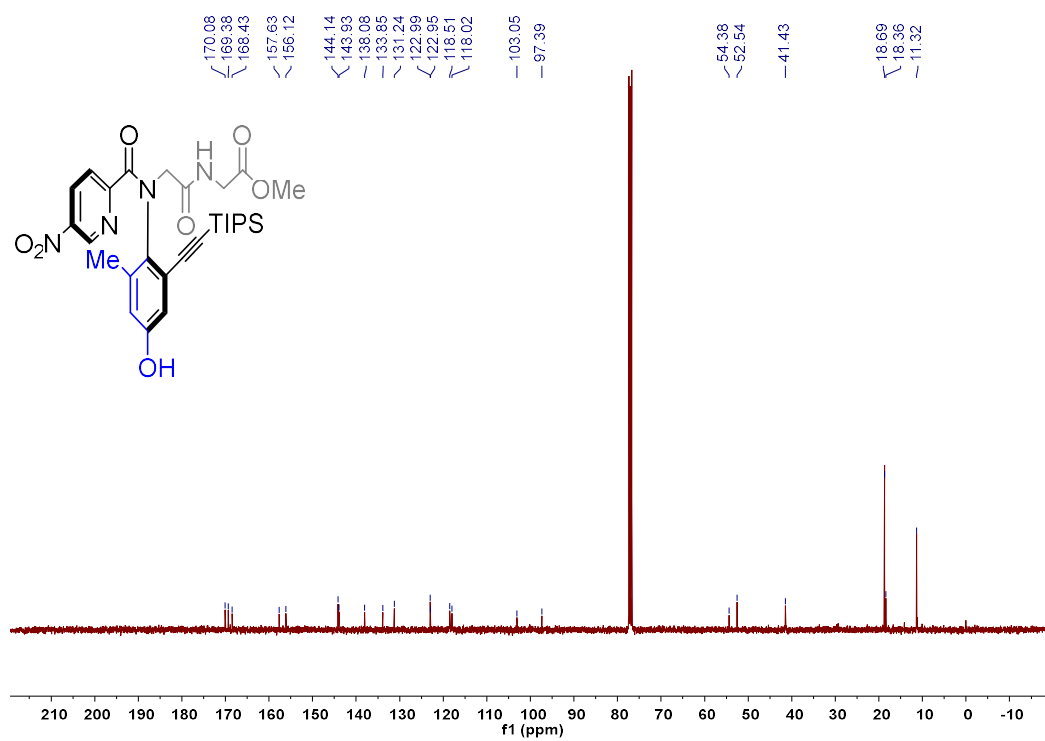

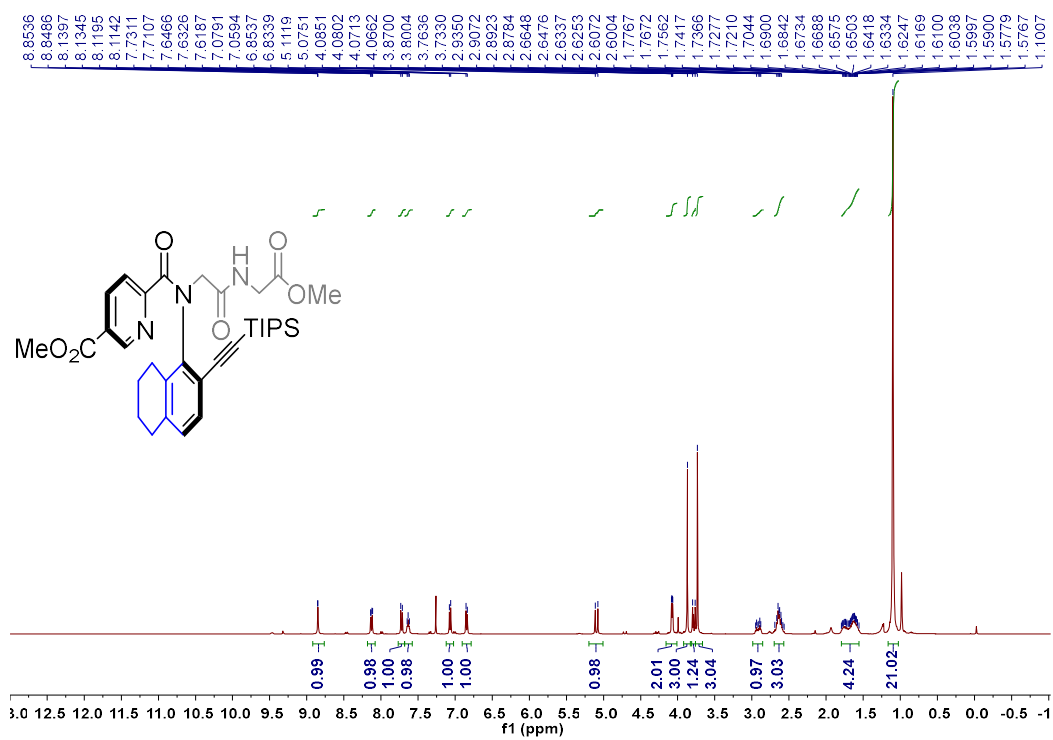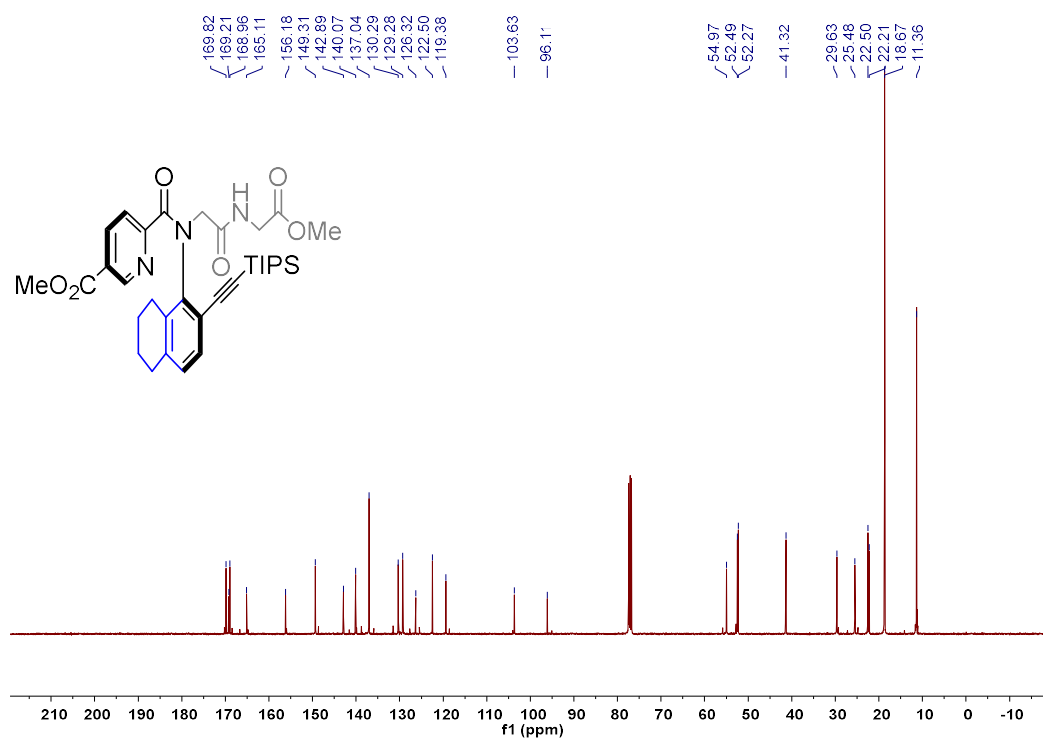

5m

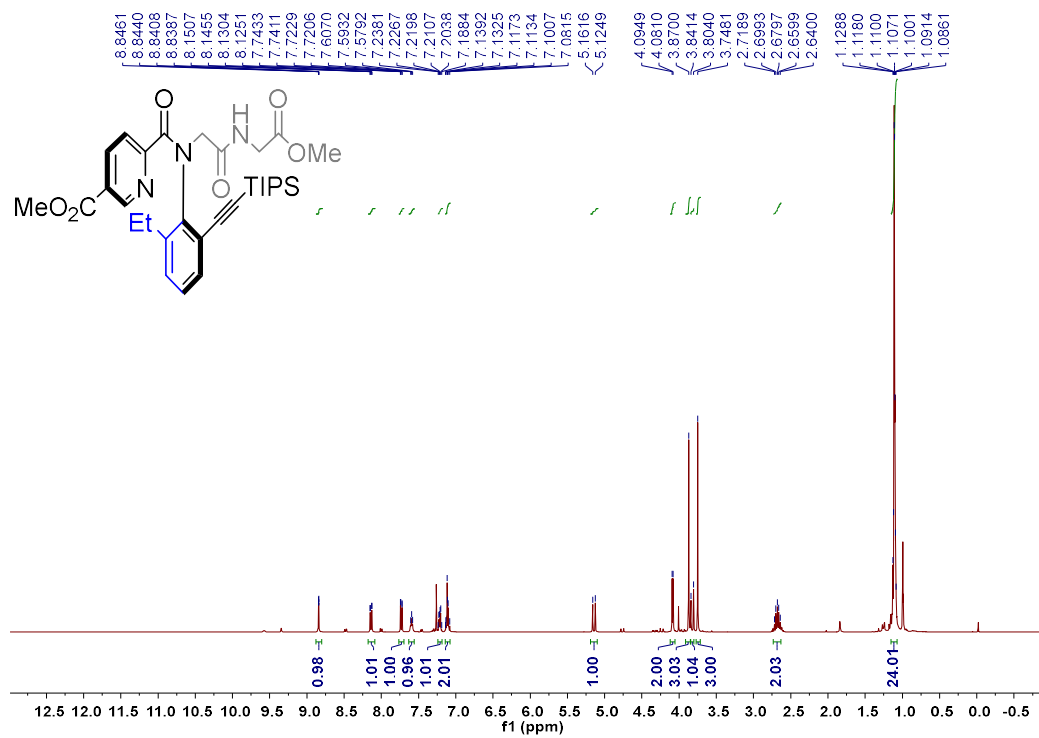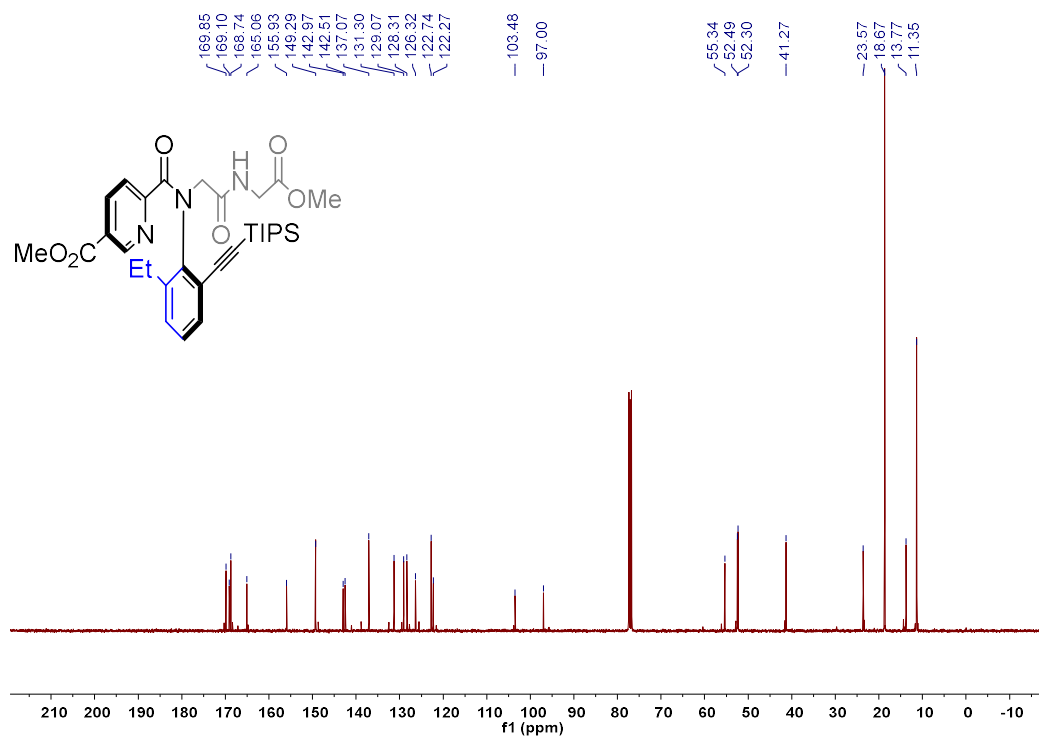

5n

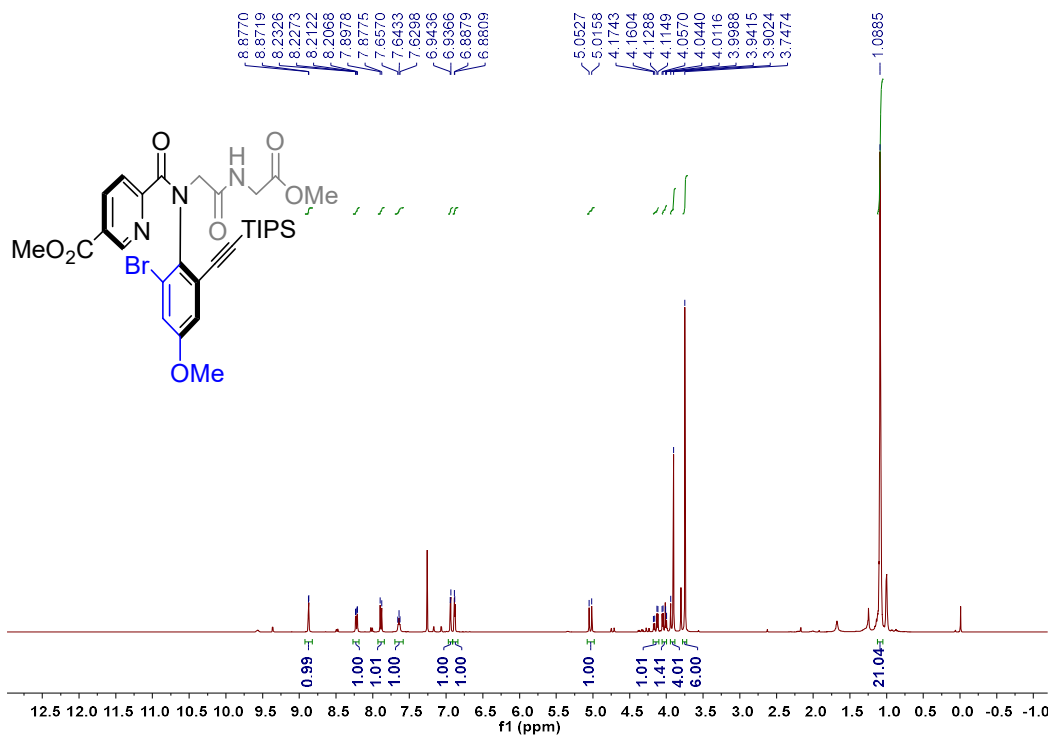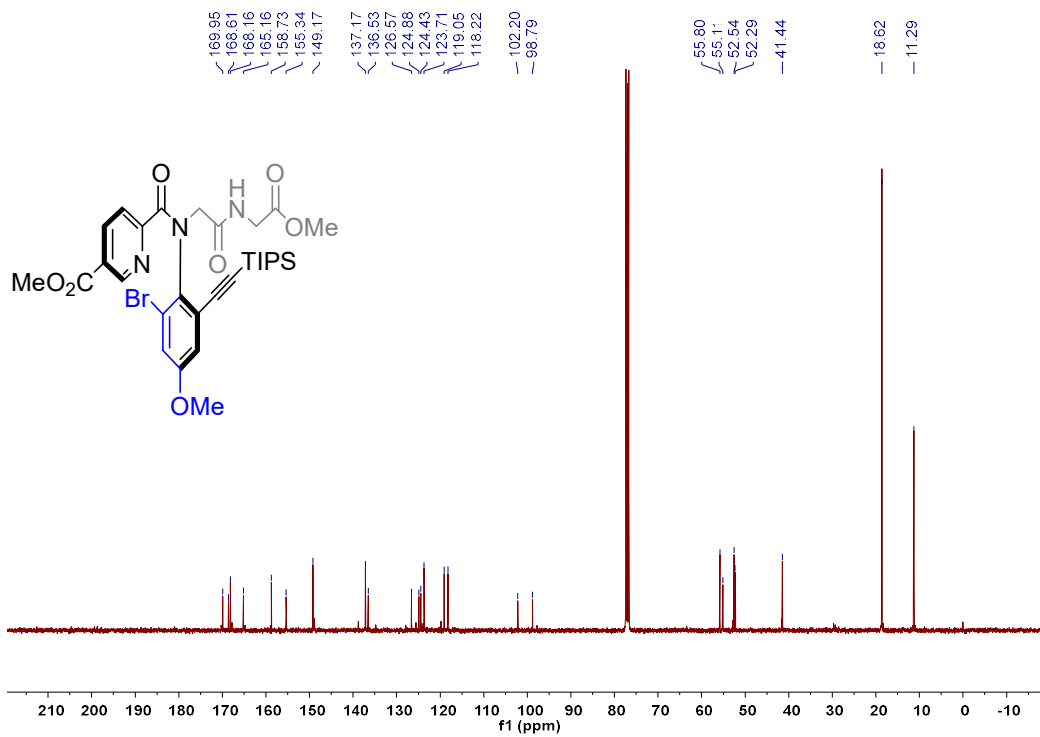



50

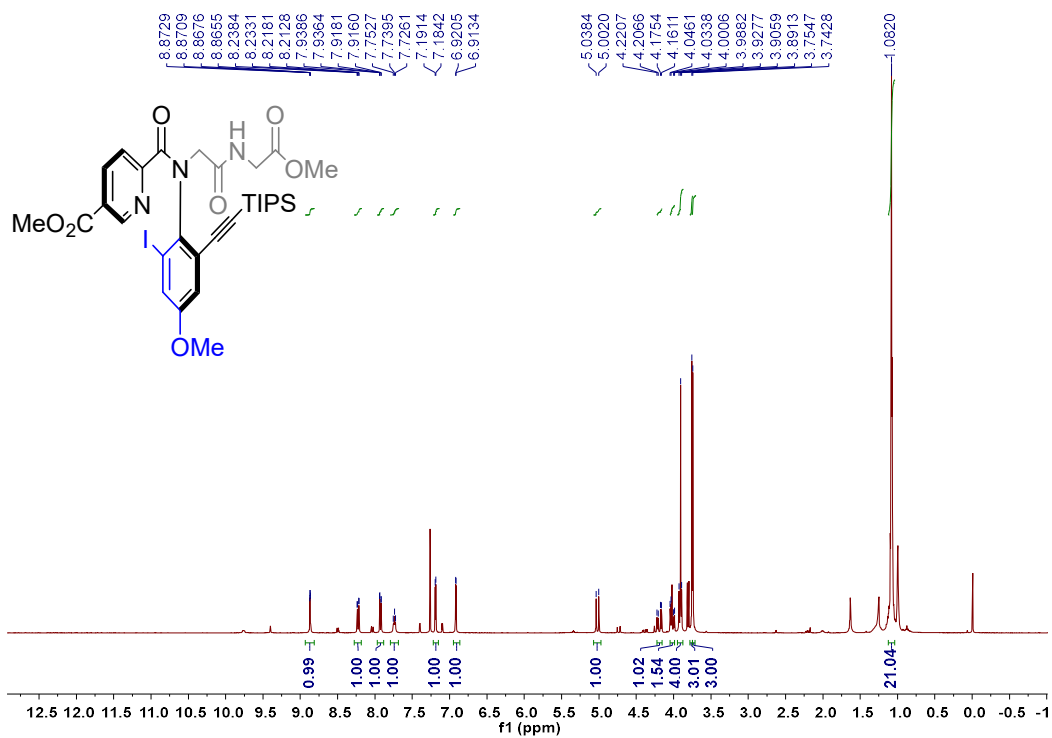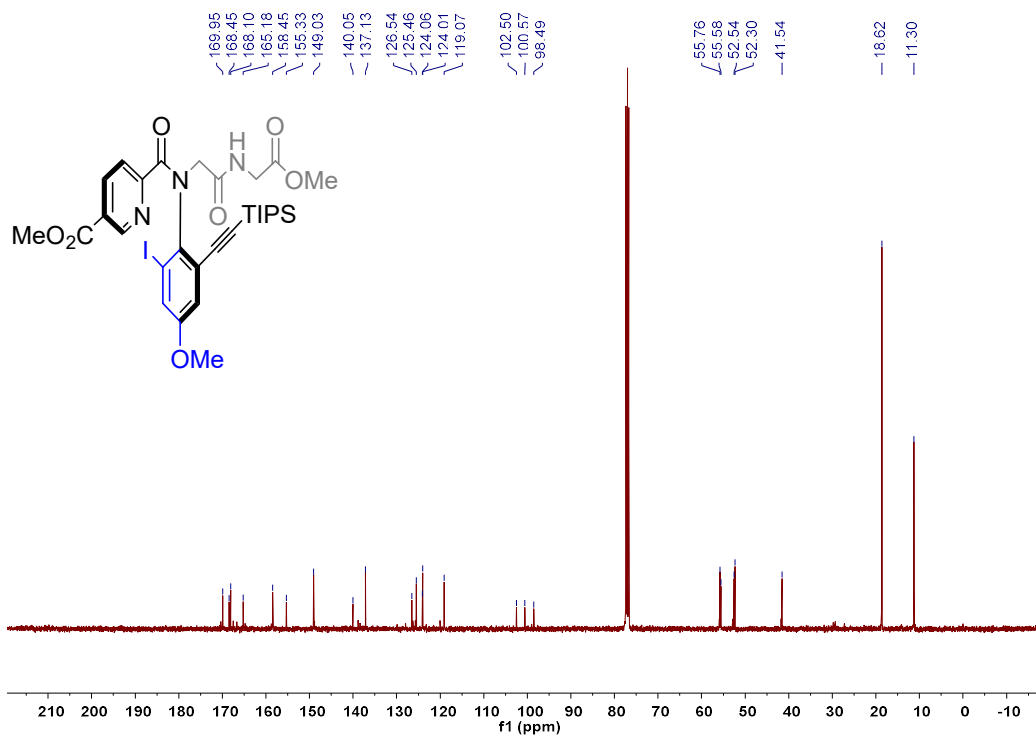

5p

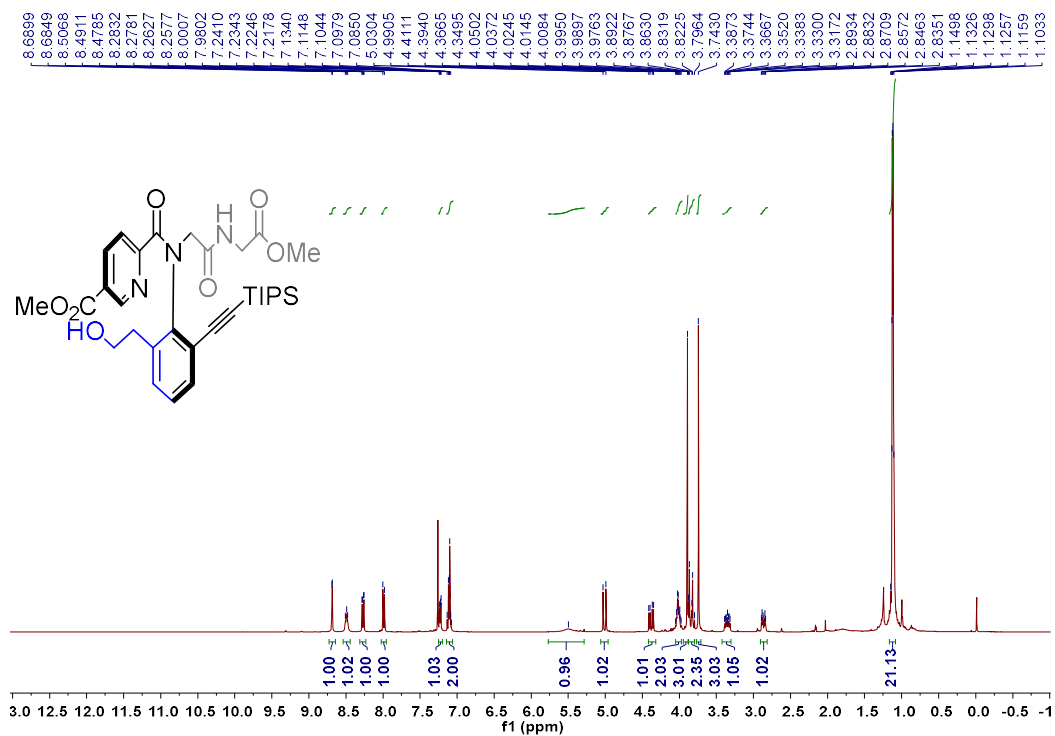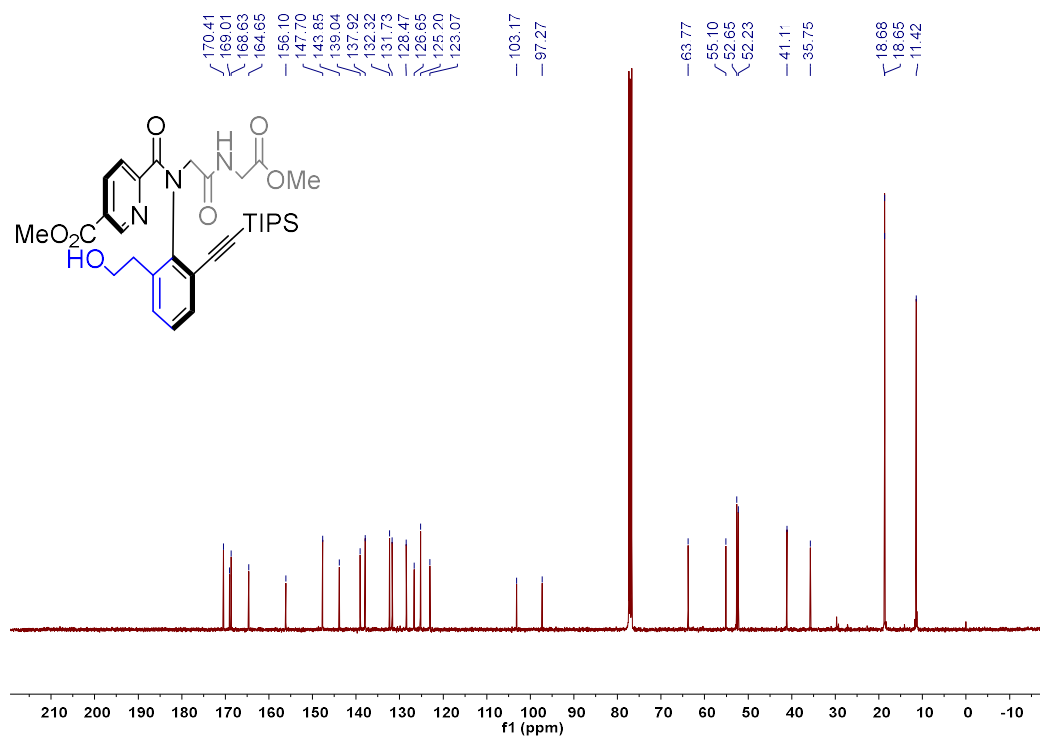

5q

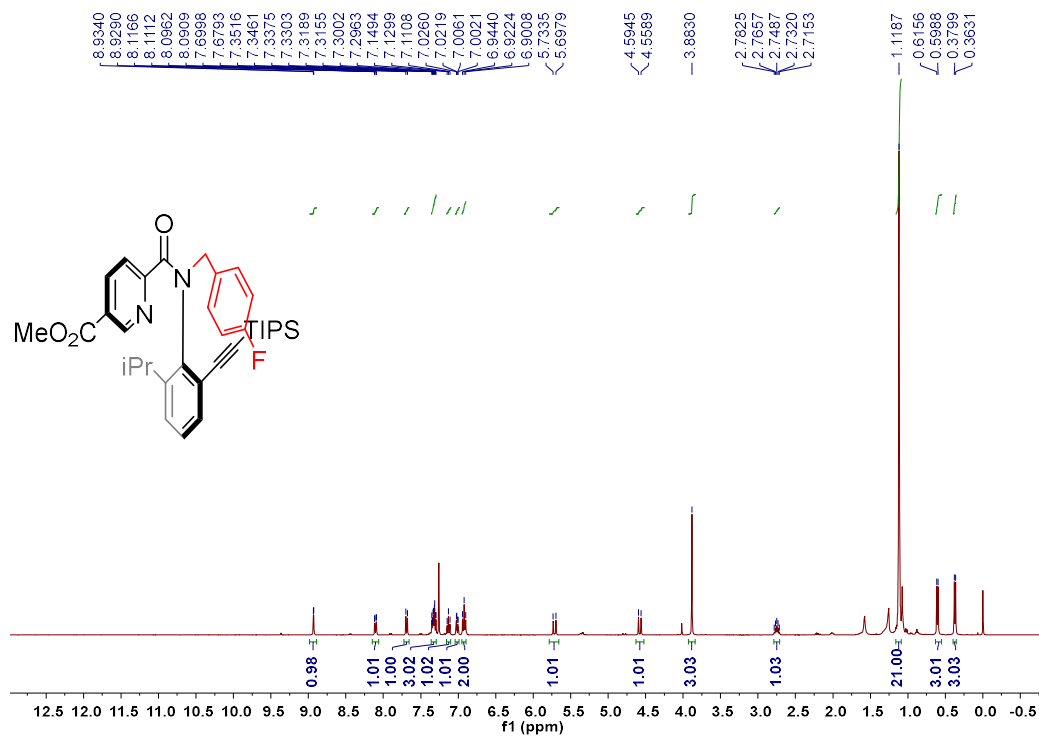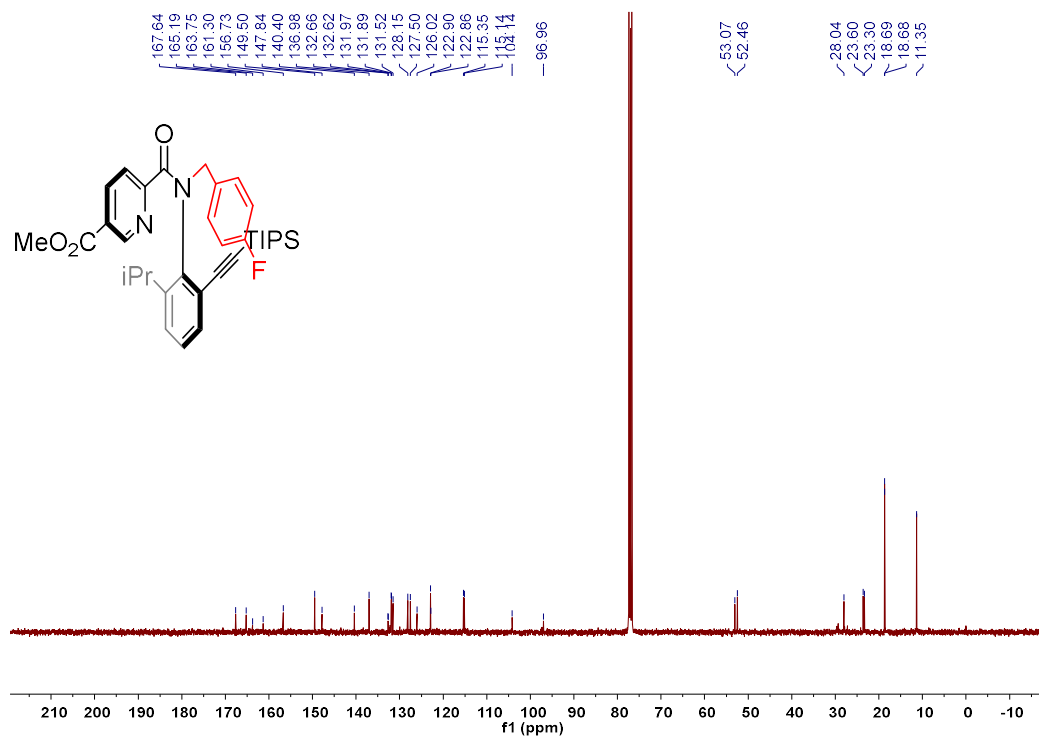

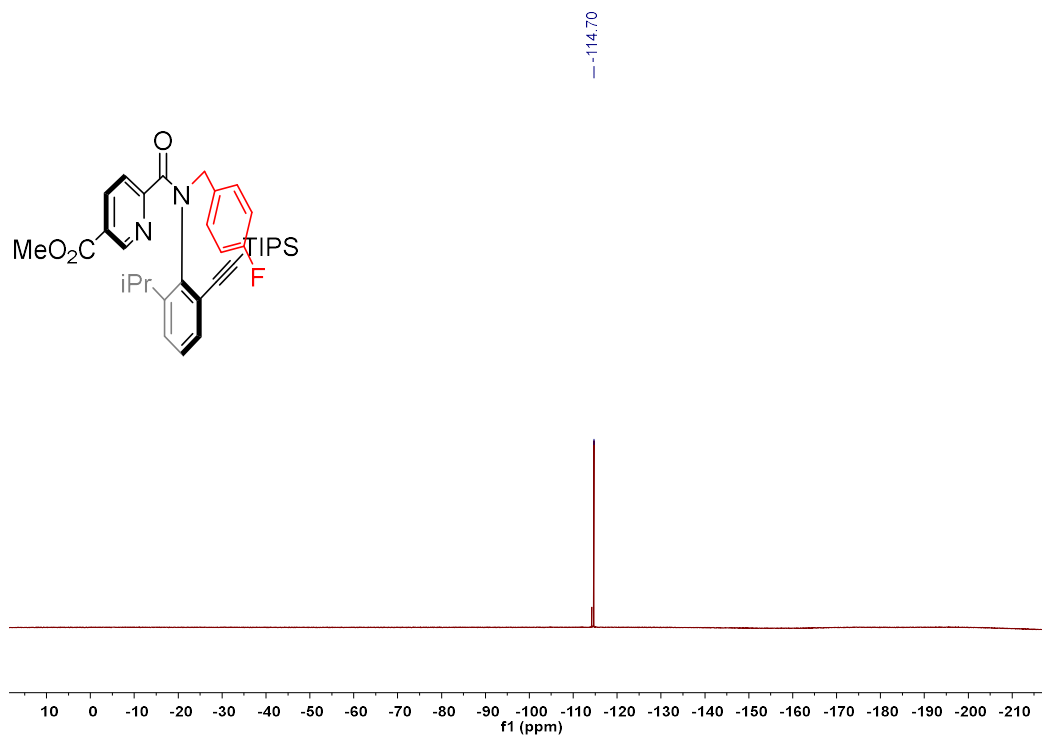

5r

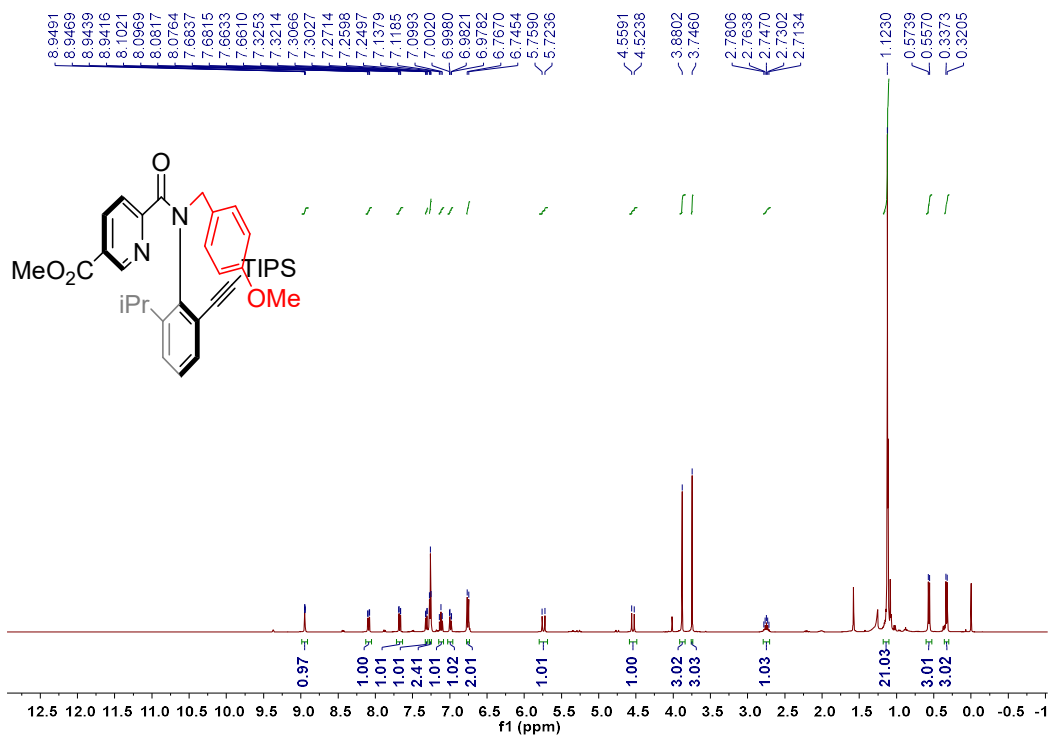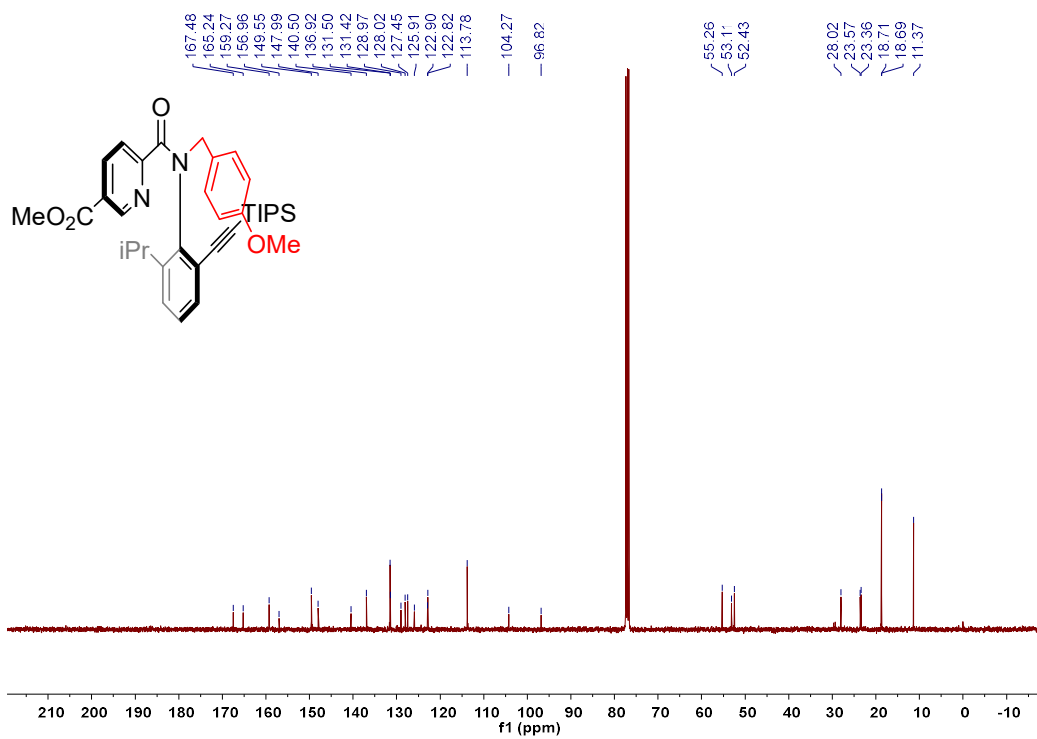

5s

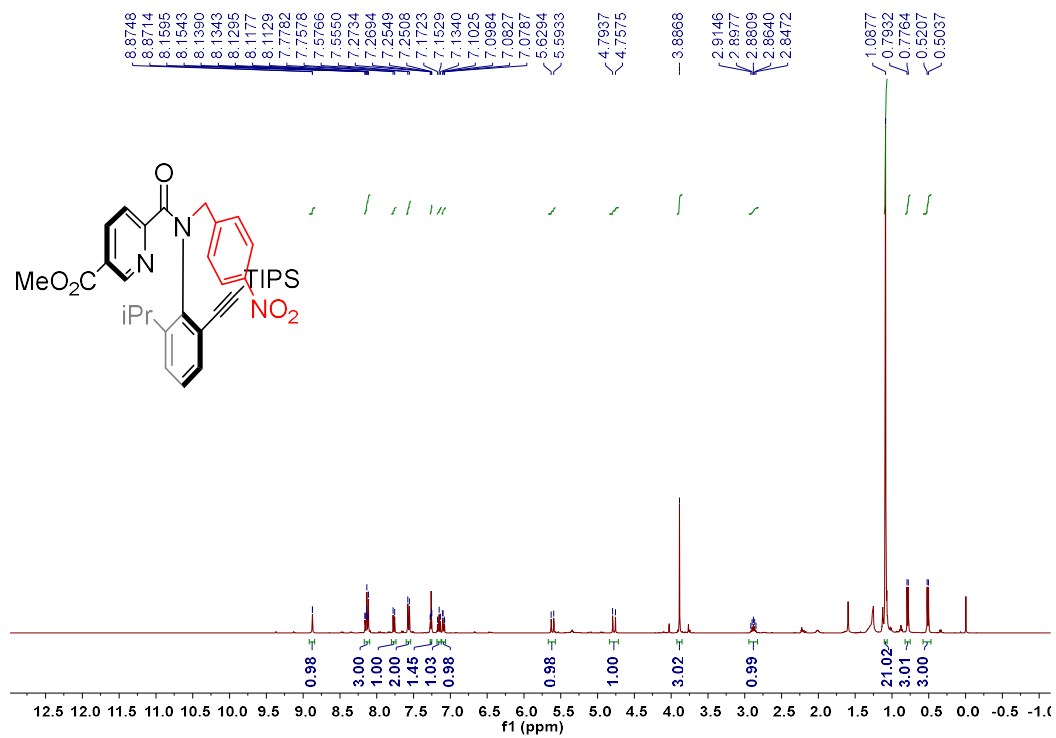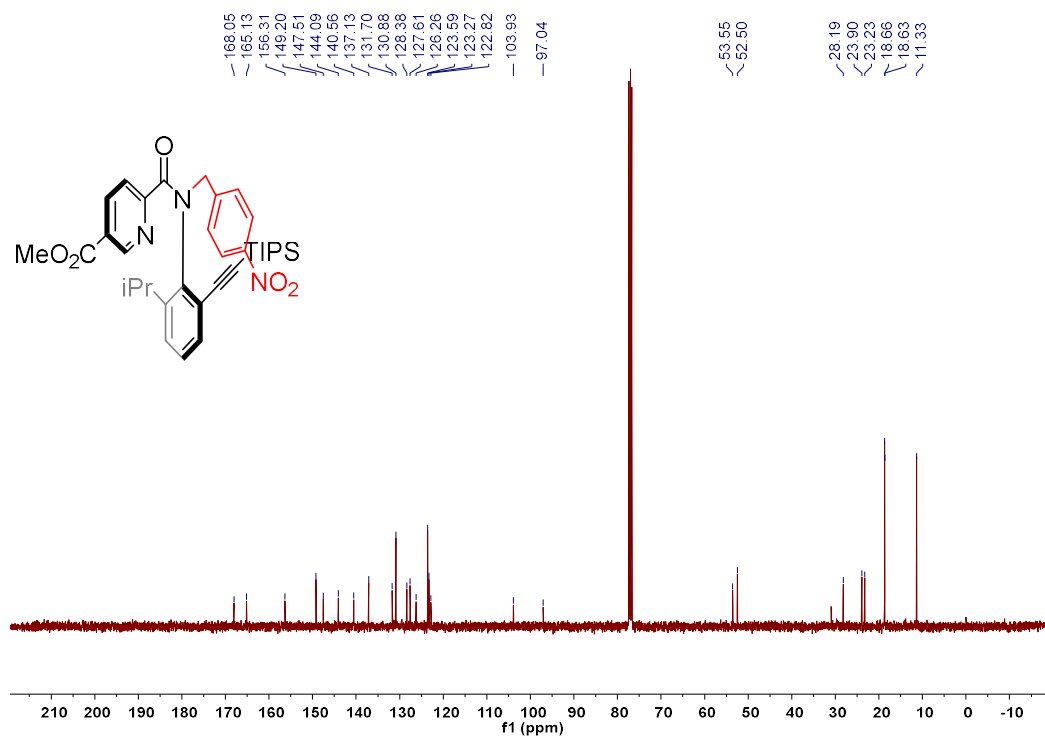

3ha

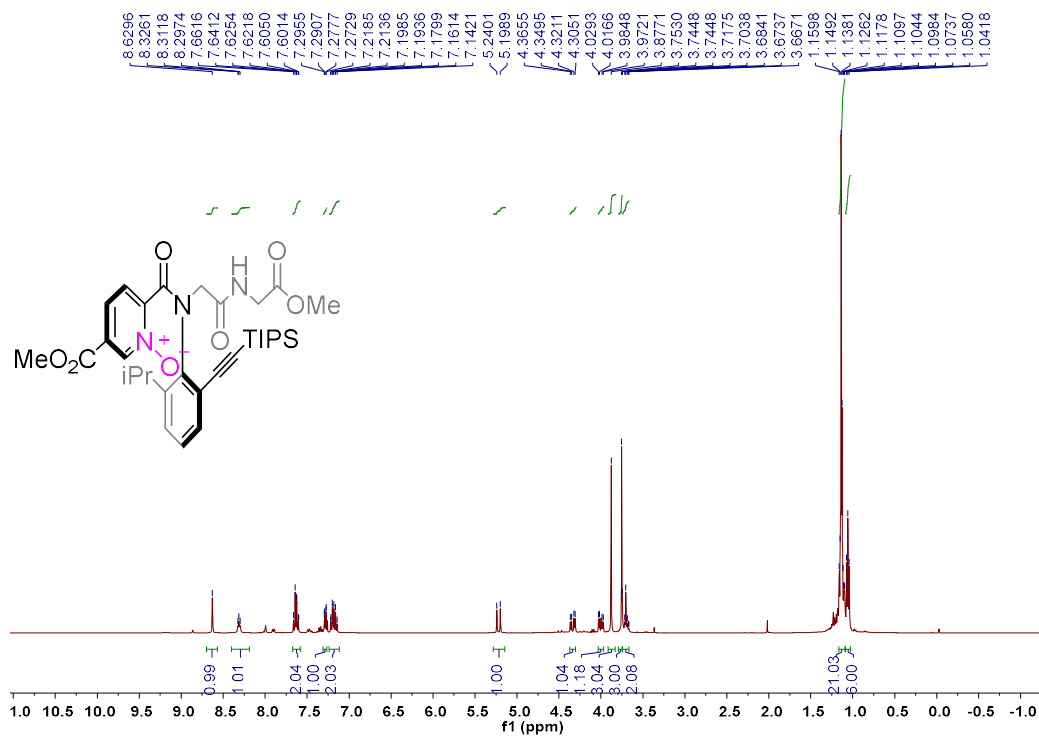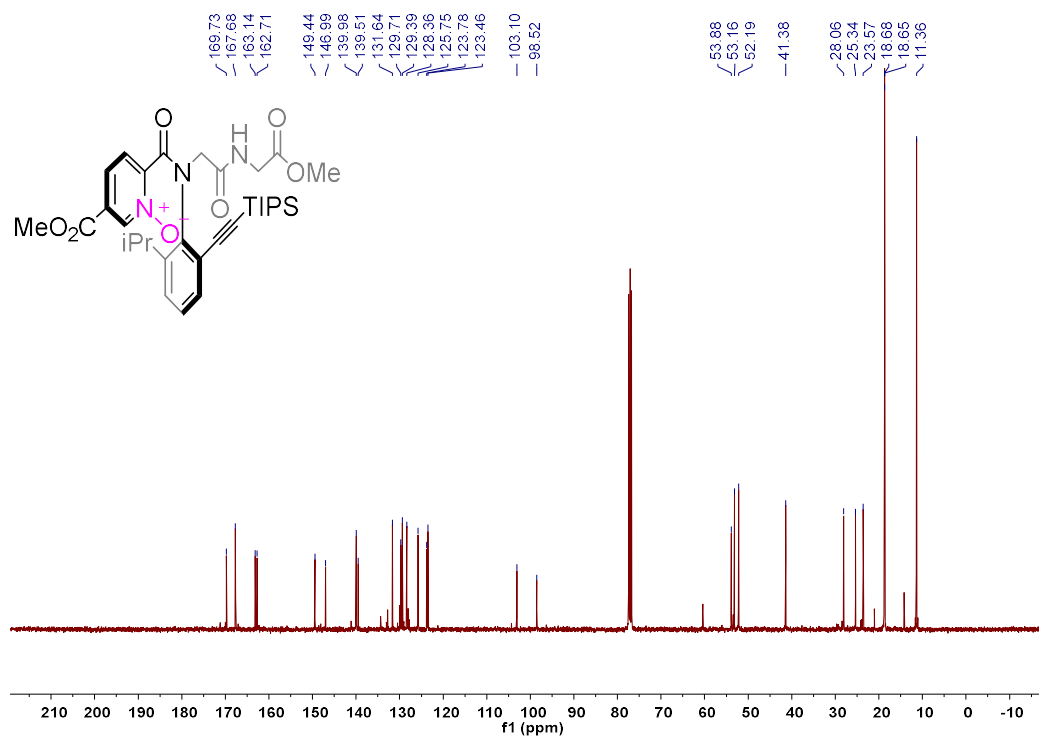

3hb

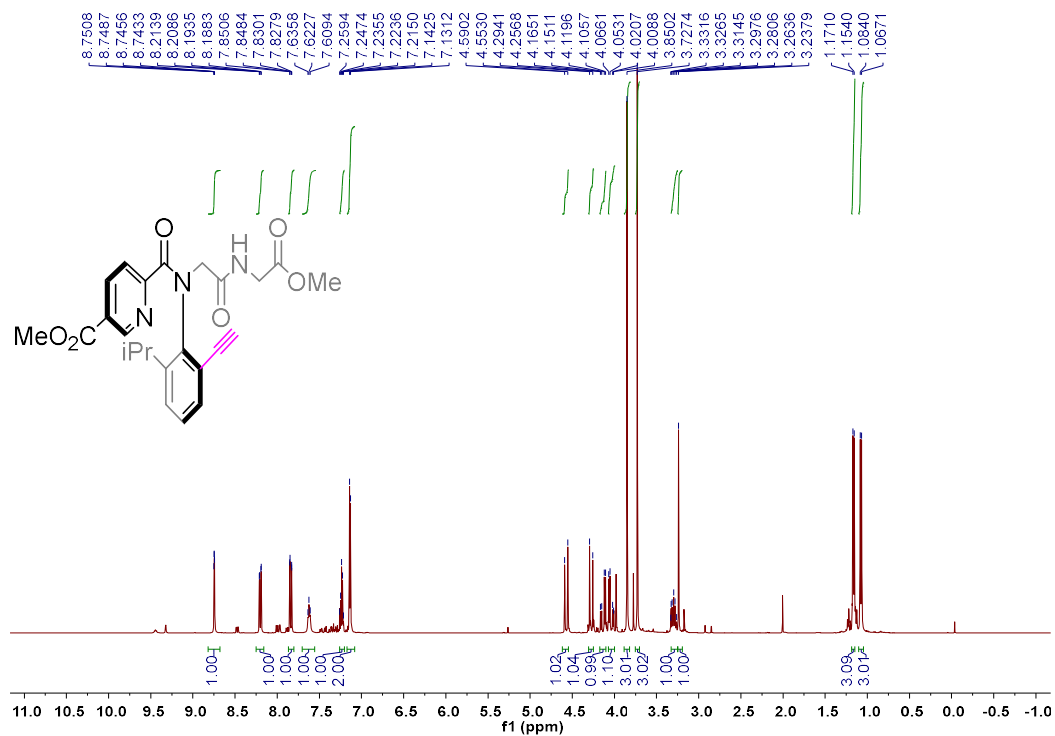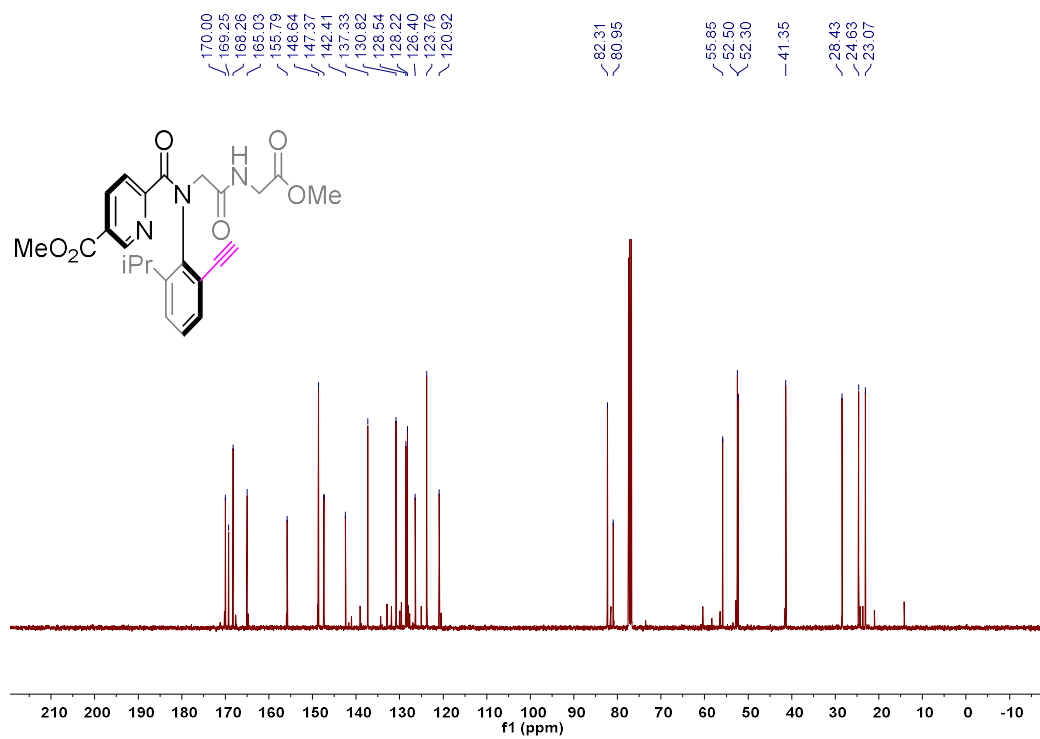



3hc

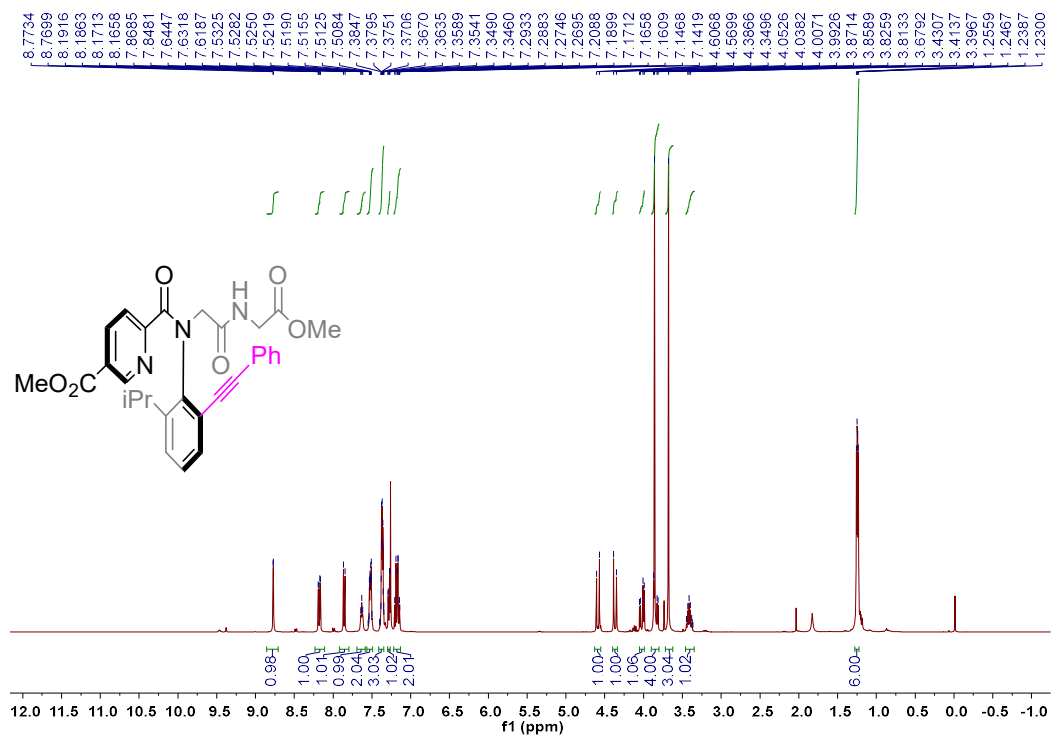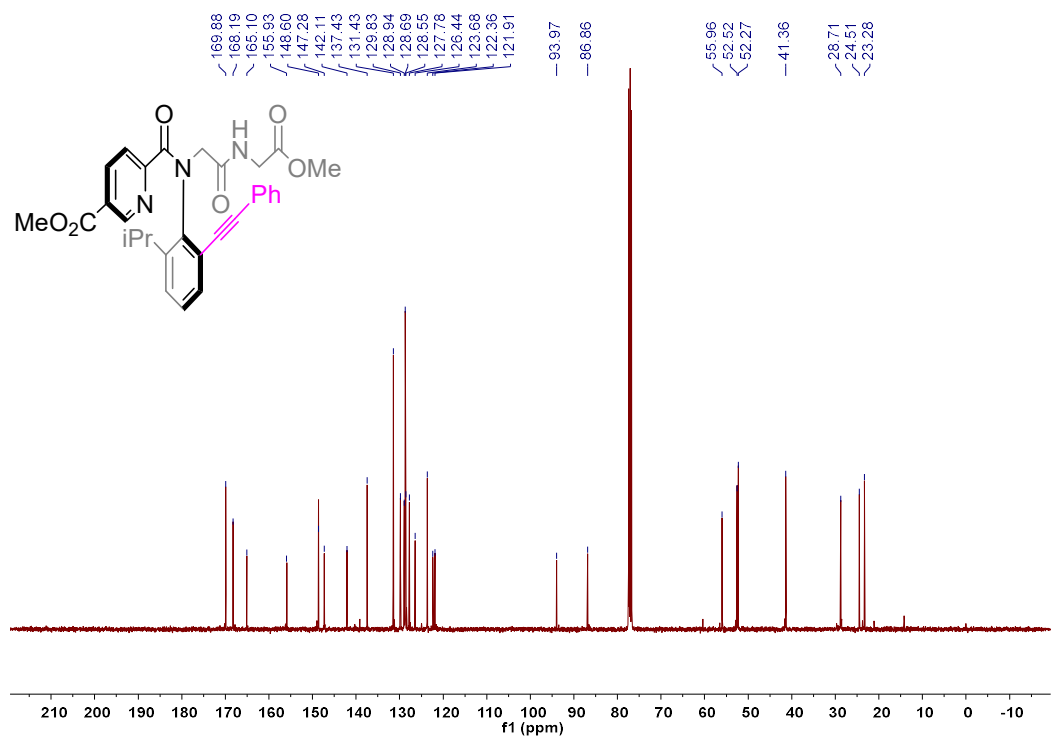

3hd

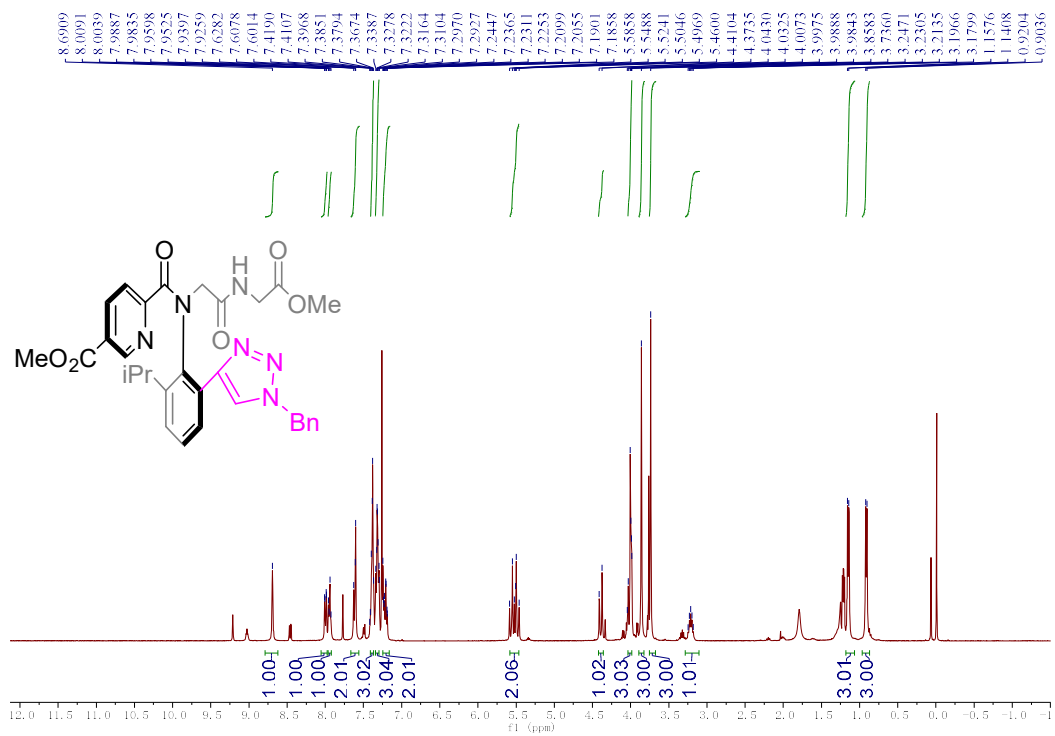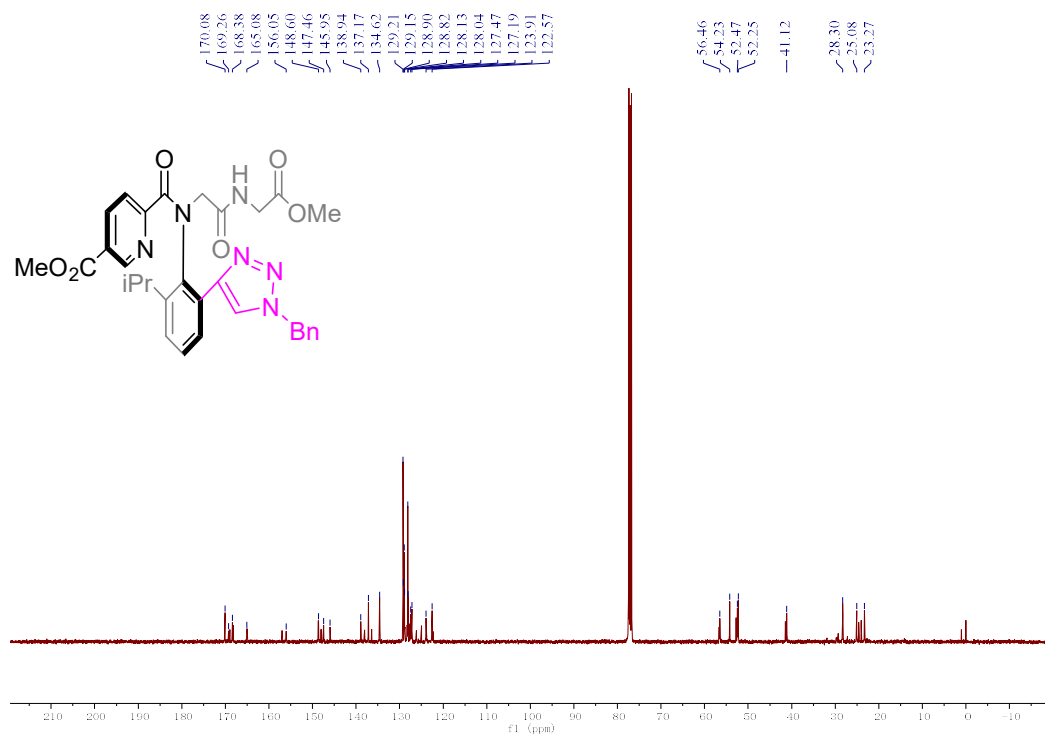

## 7. Copies of HPLC Analysis

3a: OD-H, *n*-Hexane/*i*-PrOH = 90/10, rate = 0.8 mL/min, 254nm

### <Chromatogram>

mV

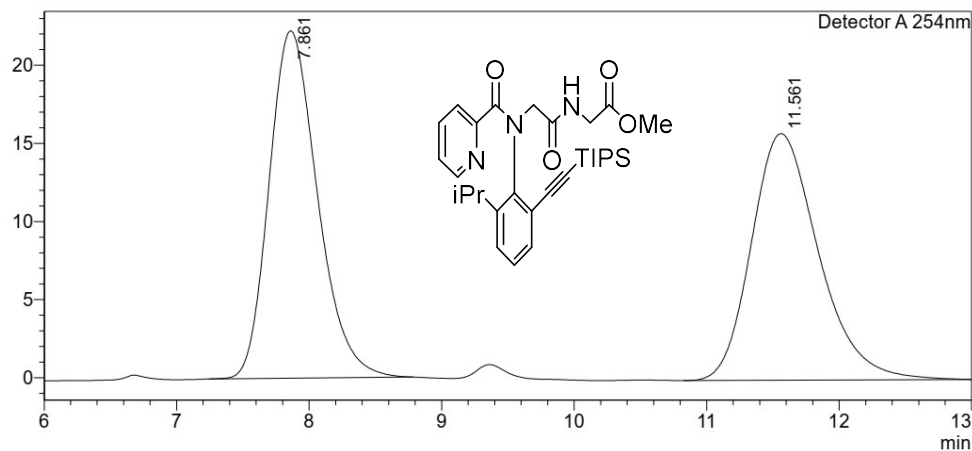

### <Peak Table>

Detector A 254nm

| Peak# | Ret. Time | Area    | Height | Conc.  | Unit | Mark | Name |
|-------|-----------|---------|--------|--------|------|------|------|
| 1     | 7.861     | 565418  | 22227  | 50.399 |      | M    |      |
| 2     | 11.561    | 556465  | 15791  | 49.601 |      | M    |      |
| Total |           | 1121883 | 38018  |        |      |      |      |

### <Chromatogram>

mV

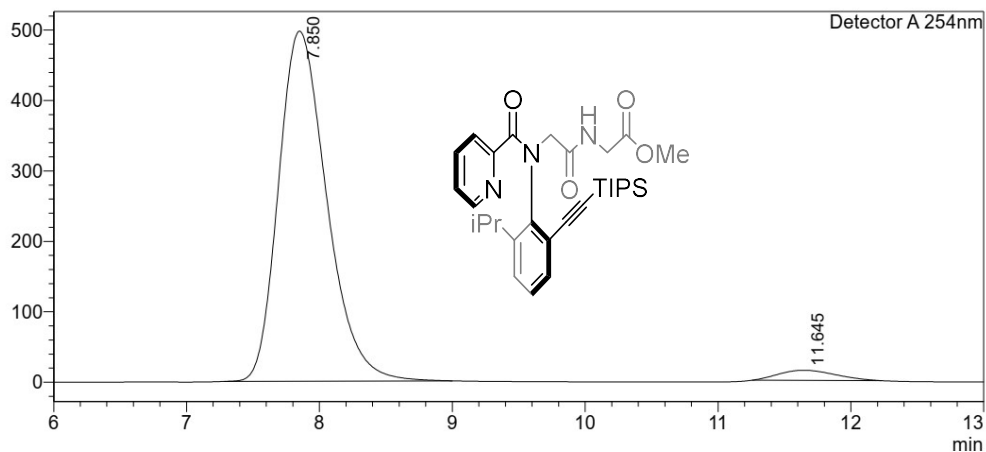

### <Peak Table>

Detector A 254nm

| Peak# | Ret. Time | Area     | Height | Conc.  | Unit | Mark | Name |
|-------|-----------|----------|--------|--------|------|------|------|
| 1     | 7.850     | 12540781 | 497211 | 96.694 |      | M    |      |
| 2     | 11.645    | 428831   | 14406  | 3.306  |      | M    |      |
| Total |           | 12969612 | 511616 |        |      |      |      |

**3d: OD-H, *n*-Hexane/*i*-PrOH = 80/20, rate = 0.8 mL/min, 254 nm**

**<Chromatogram>**

mV

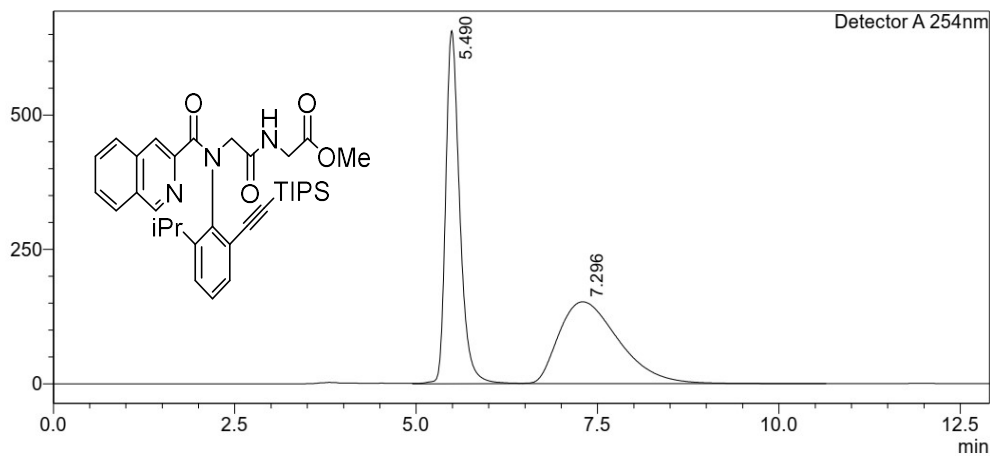

**<Peak Table>**

Detector A 254nm

| Peak# | Ret. Time | Area     | Height | Conc.  | Unit | Mark | Name |
|-------|-----------|----------|--------|--------|------|------|------|
| 1     | 5.490     | 8826544  | 656434 | 50.154 |      |      |      |
| 2     | 7.296     | 8772395  | 152303 | 49.846 |      | SV   |      |
| Total |           | 17598939 | 808737 |        |      |      |      |

**<Chromatogram>**

mV

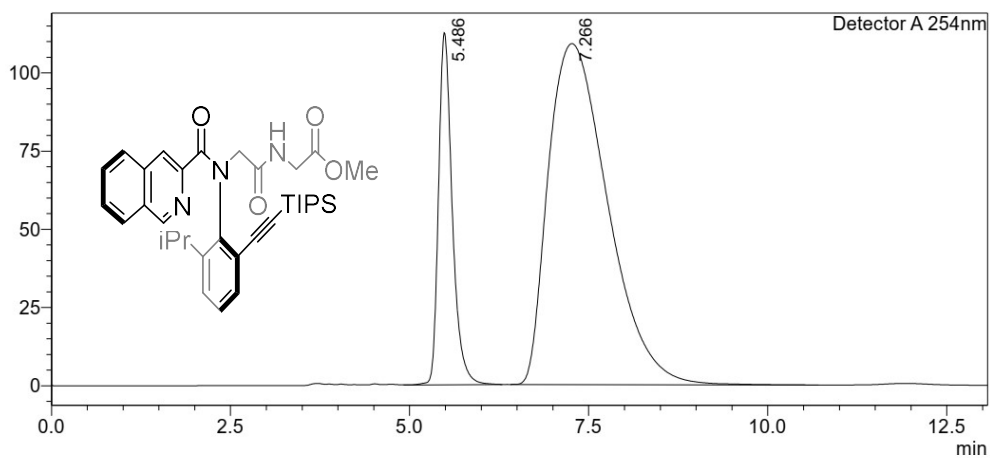

**<Peak Table>**

Detector A 254nm

| Peak# | Ret. Time | Area    | Height | Conc.  | Unit | Mark | Name |
|-------|-----------|---------|--------|--------|------|------|------|
| 1     | 5.486     | 1503468 | 112513 | 19.269 |      |      |      |
| 2     | 7.266     | 6299183 | 108993 | 80.731 |      |      |      |
| Total |           | 7802650 | 221506 |        |      |      |      |

**3e: OD-H, *n*-Hexane/*i*-PrOH = 80/20, rate = 0.8 mL/min, 254 nm**

**<Chromatogram>**

mV

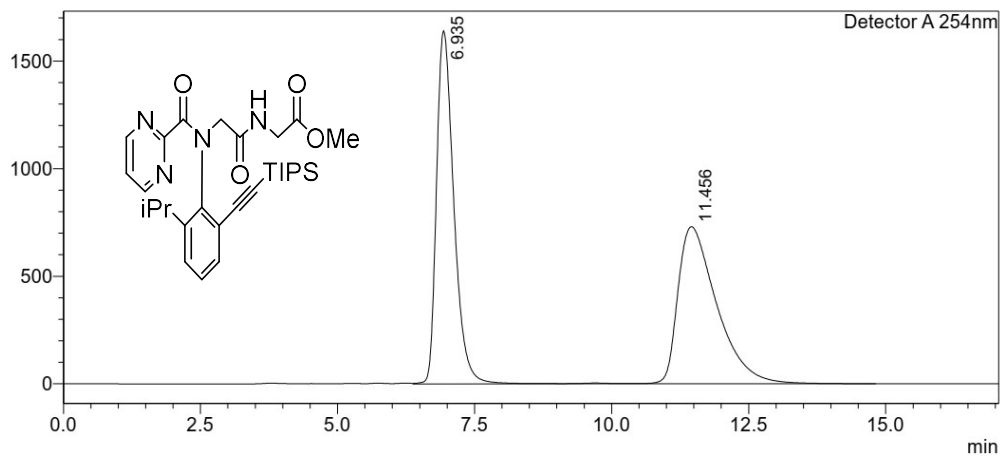

**<Peak Table>**

Detector A 254nm

| Peak# | Ret. Time | Area     | Height  | Conc.  | Unit | Mark | Name |
|-------|-----------|----------|---------|--------|------|------|------|
| 1     | 6.935     | 36139334 | 1640118 | 50.055 |      | M    |      |
| 2     | 11.456    | 36059598 | 730011  | 49.945 |      | V M  |      |
| Total |           | 72198932 | 2370129 |        |      |      |      |

**<Chromatogram>**

mV

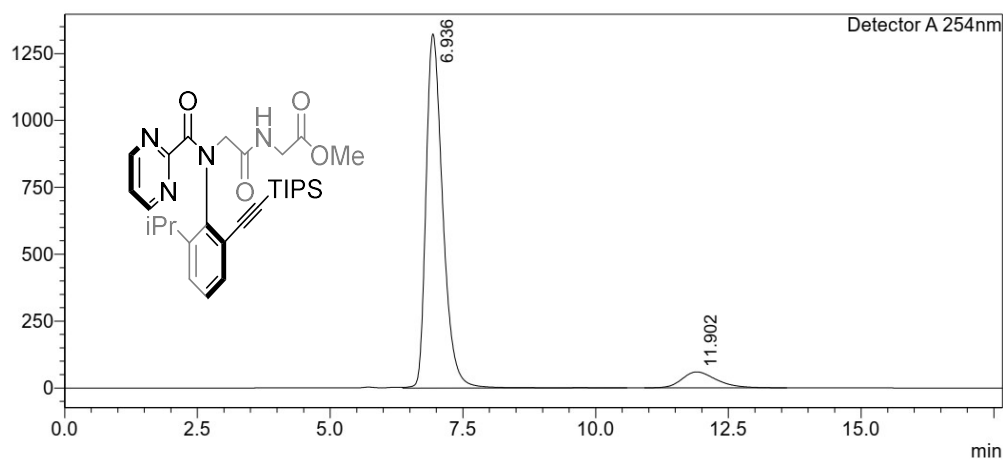

**<Peak Table>**

Detector A 254nm

| Peak# | Ret. Time | Area     | Height  | Conc.  | Unit | Mark | Name |
|-------|-----------|----------|---------|--------|------|------|------|
| 1     | 6.936     | 29006439 | 1322905 | 91.479 |      | M    |      |
| 2     | 11.902    | 2701778  | 59604   | 8.521  |      | M    |      |
| Total |           | 31708217 | 1382509 |        |      |      |      |

3f: OD-H, *n*-Hexane/*i*-PrOH = 85/15, rate = 0.8 mL/min, 254 nm

<Chromatogram>

mV

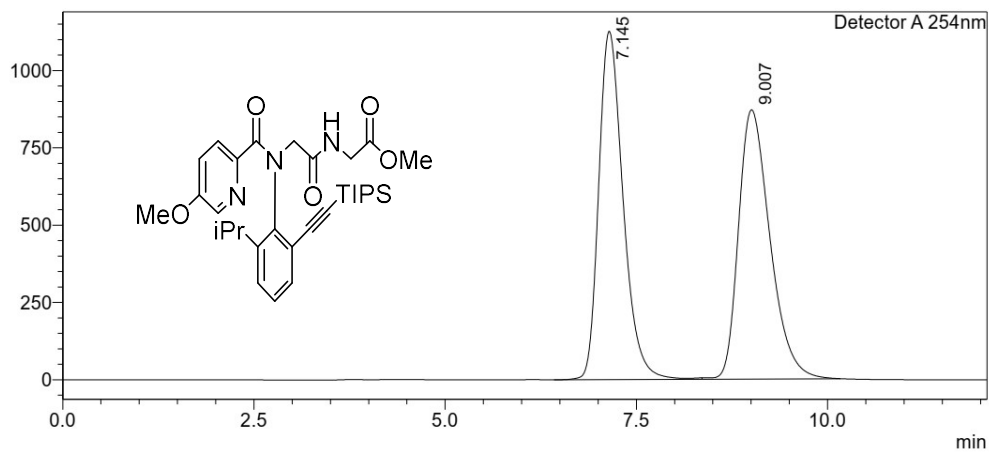

<Peak Table>

Detector A 254nm

| Peak# | Ret. Time | Area     | Height  | Conc.  | Unit | Mark | Name |
|-------|-----------|----------|---------|--------|------|------|------|
| 1     | 7.145     | 24989102 | 1126598 | 50.082 |      | M    |      |
| 2     | 9.007     | 24907621 | 871041  | 49.918 |      | V M  |      |
| Total |           | 49896723 | 1997639 |        |      |      |      |

<Chromatogram>

mV

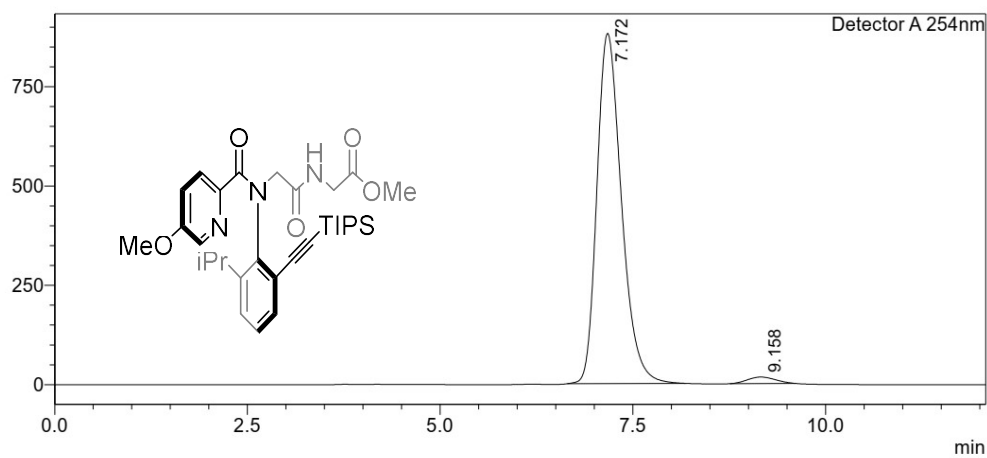

<Peak Table>

Detector A 254nm

| Peak# | Ret. Time | Area     | Height | Conc.  | Unit | Mark | Name |
|-------|-----------|----------|--------|--------|------|------|------|
| 1     | 7.172     | 19540678 | 881249 | 97.922 |      | M    |      |
| 2     | 9.158     | 414690   | 16397  | 2.078  |      | M    |      |
| Total |           | 19955368 | 897646 |        |      |      |      |

3g: AD-H, *n*-Hexane/*i*-PrOH = 85/15, rate = 0.8 mL/min, 254nm

<Chromatogram>

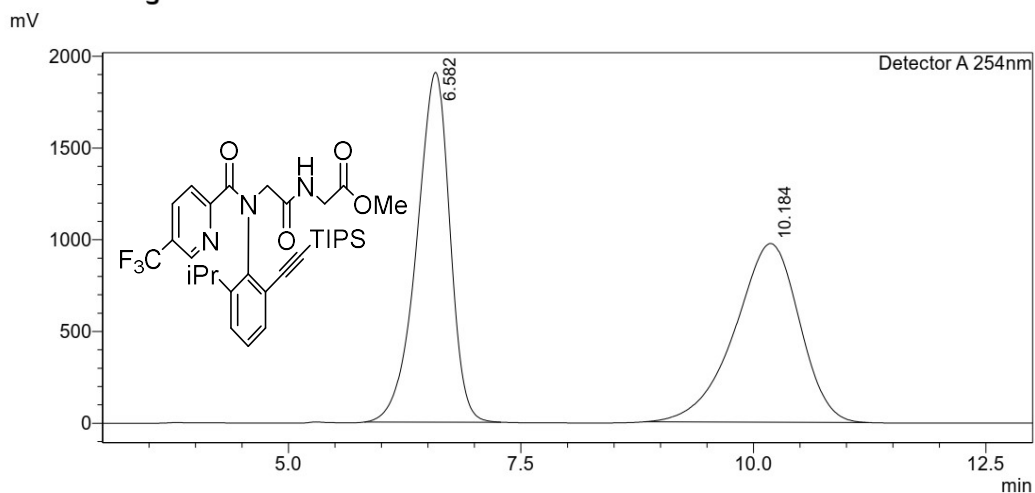

<Peak Table>

| Detector A 254nm |           |          |         |        |      |      |      |
|------------------|-----------|----------|---------|--------|------|------|------|
| Peak#            | Ret. Time | Area     | Height  | Conc.  | Unit | Mark | Name |
| 1                | 6.582     | 47323316 | 1906633 | 50.060 |      | M    |      |
| 2                | 10.184    | 47209965 | 973816  | 49.940 |      | M    |      |
| Total            |           | 94533281 | 2880450 |        |      |      |      |

<Chromatogram>

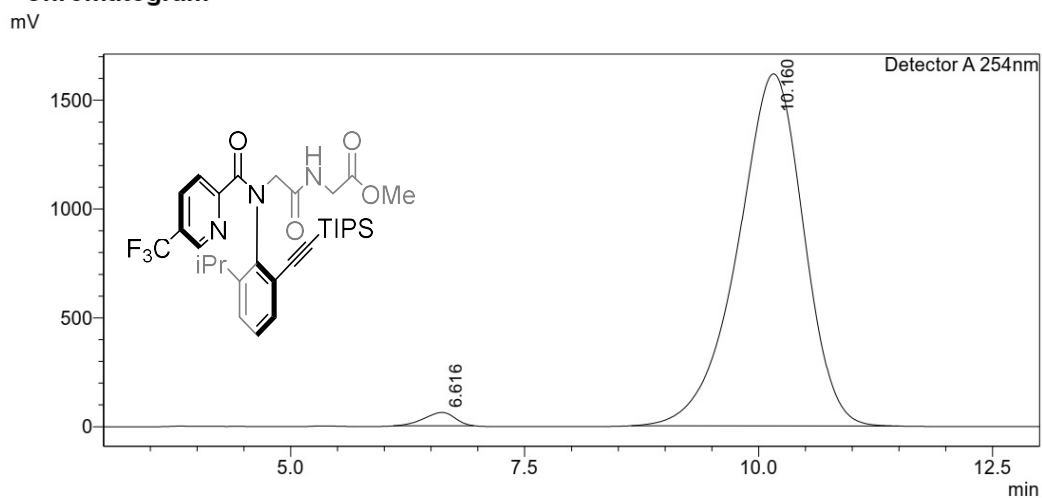

<Peak Table>

| Detector A 254nm |           |          |         |        |      |      |      |
|------------------|-----------|----------|---------|--------|------|------|------|
| Peak#            | Ret. Time | Area     | Height  | Conc.  | Unit | Mark | Name |
| 1                | 6.616     | 1409687  | 61239   | 1.748  |      | M    |      |
| 2                | 10.160    | 79248148 | 1617872 | 98.252 |      | M    |      |
| Total            |           | 80657836 | 1679111 |        |      |      |      |

3h: OD-H, *n*-Hexane/*i*-PrOH = 95/5, rate = 0.8 mL/min, 254 nm

<Chromatogram>

mV

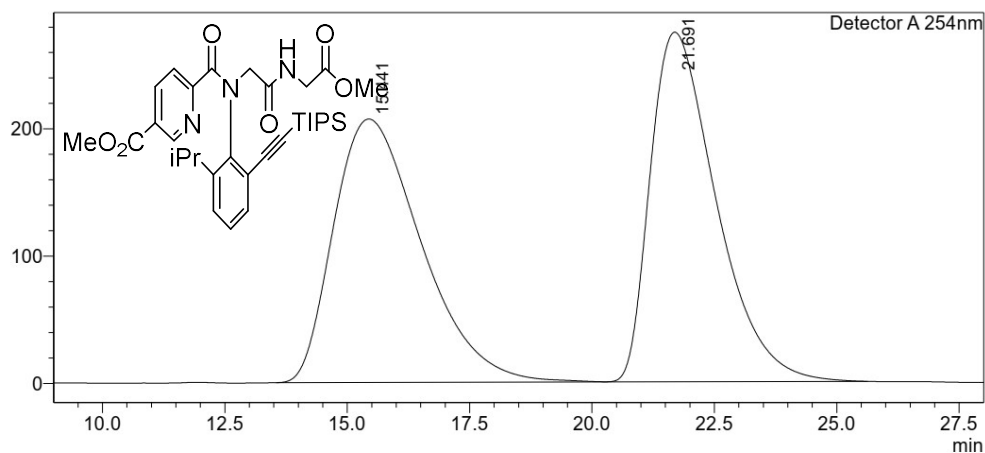

<Peak Table>

Detector A 254nm

| Peak# | Ret. Time | Area     | Height | Conc.  | Unit | Mark | Name |
|-------|-----------|----------|--------|--------|------|------|------|
| 1     | 15.441    | 25822193 | 207022 | 50.061 |      | M    |      |
| 2     | 21.691    | 25759122 | 274743 | 49.939 |      | V M  |      |
| Total |           | 51581315 | 481766 |        |      |      |      |

<Chromatogram>

mV

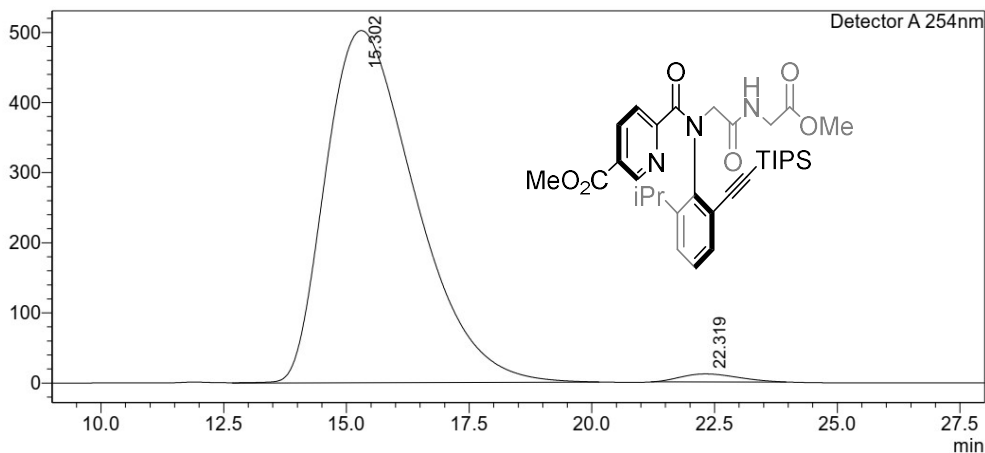

<Peak Table>

Detector A 254nm

| Peak# | Ret. Time | Area     | Height | Conc.  | Unit | Mark | Name |
|-------|-----------|----------|--------|--------|------|------|------|
| 1     | 15.302    | 63858106 | 502171 | 98.558 |      | M    |      |
| 2     | 22.319    | 934210   | 11446  | 1.442  |      | M    |      |
| Total |           | 64792315 | 513616 |        |      |      |      |



**3i: AD-H, *n*-Hexane/*i*-PrOH = 85/15, rate = 0.8 mL/min, 254nm**

**<Chromatogram>**

mV

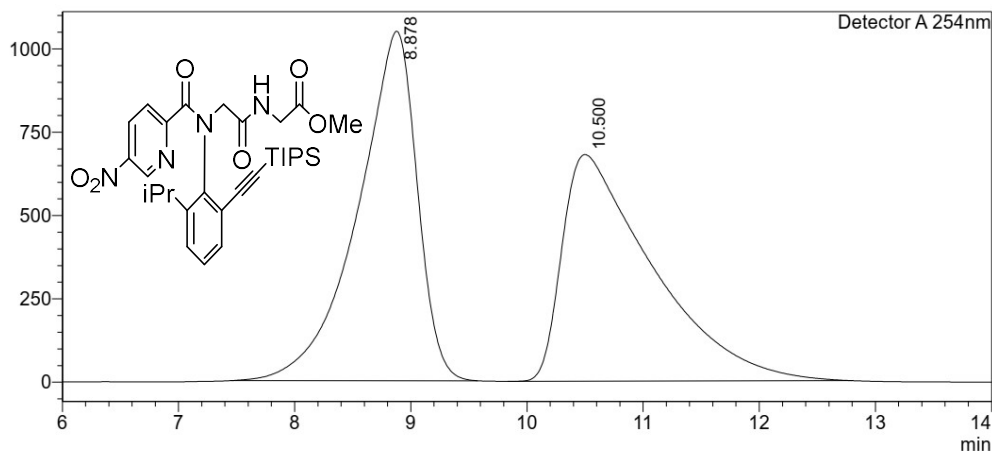

**<Peak Table>**

Detector A 254nm

| Peak# | Ret. Time | Area     | Height  | Conc.  | Unit | Mark | Name |
|-------|-----------|----------|---------|--------|------|------|------|
| 1     | 8.878     | 37210480 | 1048530 | 50.239 |      | M    |      |
| 2     | 10.500    | 36856676 | 679805  | 49.761 |      | M    |      |
| Total |           | 74067156 | 1728334 |        |      |      |      |

**<Chromatogram>**

mV

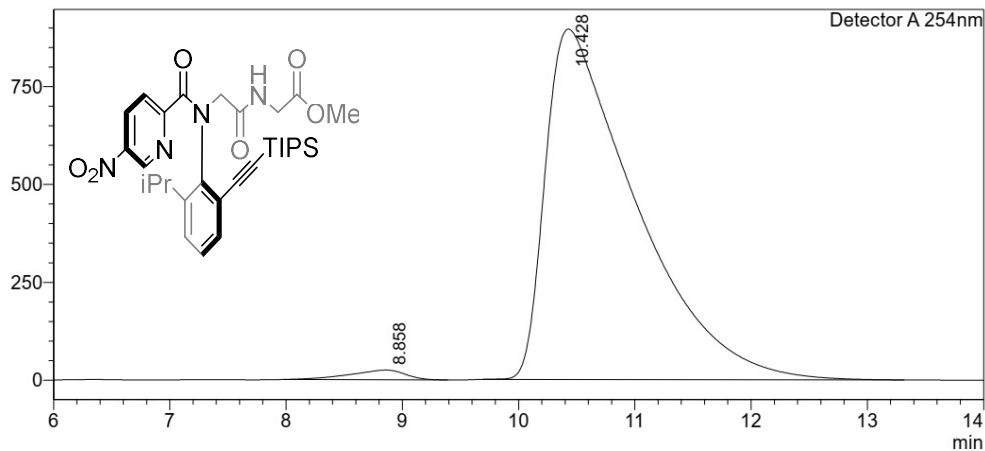

**<Peak Table>**

Detector A 254nm

| Peak# | Ret. Time | Area     | Height | Conc.  | Unit | Mark | Name |
|-------|-----------|----------|--------|--------|------|------|------|
| 1     | 8.858     | 830027   | 24955  | 1.681  |      | M    |      |
| 2     | 10.428    | 48560437 | 895351 | 98.319 |      | M    |      |
| Total |           | 49390464 | 920306 |        |      |      |      |

**3j: OD-H, *n*-Hexane/*i*-PrOH = 95/5, rate = 0.8 mL/min, 254 nm**

**<Chromatogram>**

mV

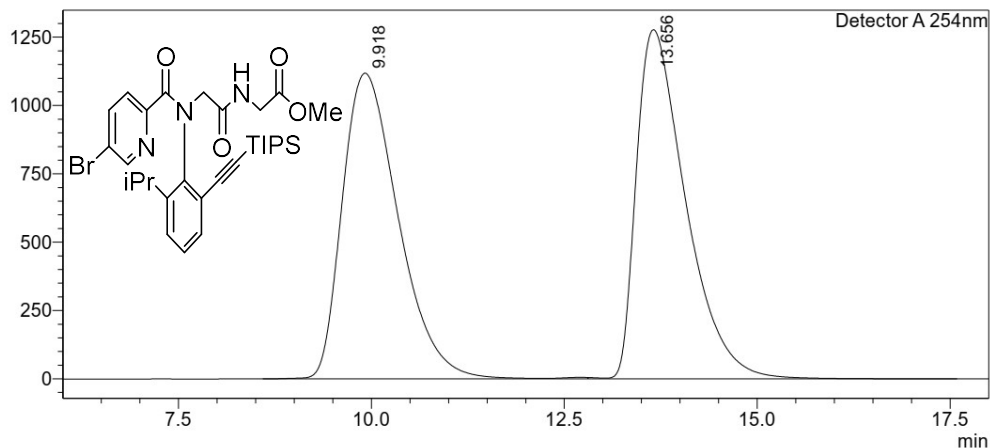

**<Peak Table>**

Detector A 254nm

| Peak# | Ret. Time | Area      | Height  | Conc.  | Unit | Mark | Name |
|-------|-----------|-----------|---------|--------|------|------|------|
| 1     | 9.918     | 56725570  | 1118656 | 49.952 |      | M    |      |
| 2     | 13.656    | 56834927  | 1277511 | 50.048 |      | V M  |      |
| Total |           | 113560497 | 2396167 |        |      |      |      |

**<Chromatogram>**

mV

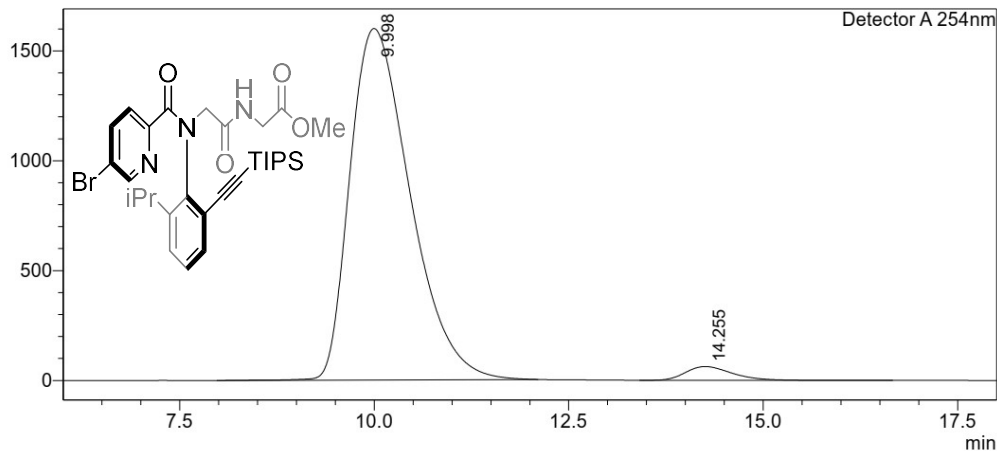

**<Peak Table>**

Detector A 254nm

| Peak# | Ret. Time | Area     | Height  | Conc.  | Unit | Mark | Name |
|-------|-----------|----------|---------|--------|------|------|------|
| 1     | 9.998     | 86181163 | 1599205 | 97.051 |      | M    |      |
| 2     | 14.255    | 2619036  | 62731   | 2.949  |      | M    |      |
| Total |           | 88800198 | 1661936 |        |      |      |      |

3k: OD-H, *n*-Hexane/*i*-PrOH = 90/10, rate = 0.8 mL/min, 254 nm

<Chromatogram>

mV

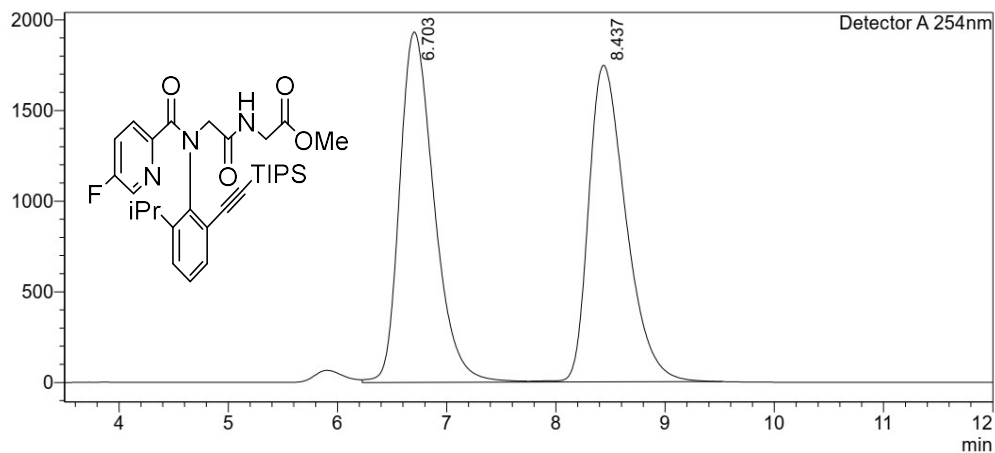

<Peak Table>

Detector A 254nm

| Peak# | Ret. Time | Area     | Height  | Conc.  | Unit | Mark | Name |
|-------|-----------|----------|---------|--------|------|------|------|
| 1     | 6.703     | 42317151 | 1931742 | 50.565 |      | M    |      |
| 2     | 8.437     | 41372157 | 1745901 | 49.435 |      | V M  |      |
| Total |           | 83689308 | 3677642 |        |      |      |      |

<Chromatogram>

mV

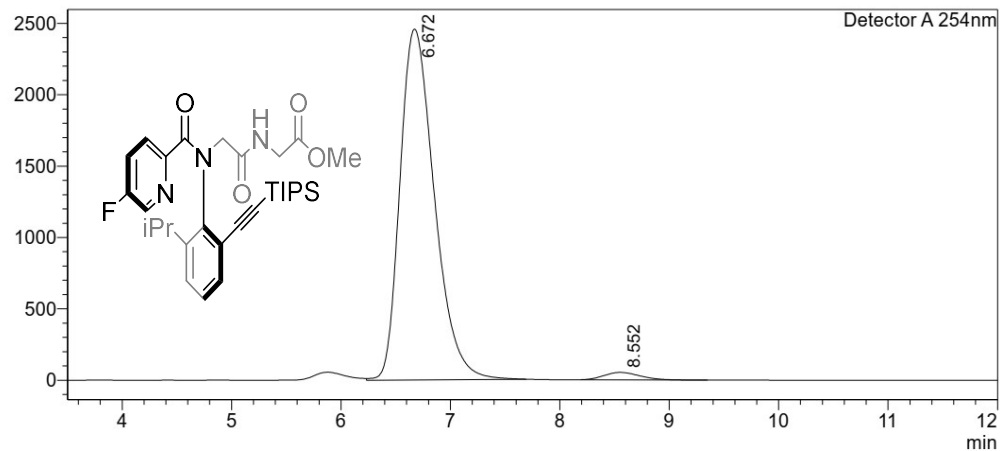

<Peak Table>

Detector A 254nm

| Peak# | Ret. Time | Area     | Height  | Conc.  | Unit | Mark | Name |
|-------|-----------|----------|---------|--------|------|------|------|
| 1     | 6.672     | 53734678 | 2457776 | 97.848 |      | M    |      |
| 2     | 8.552     | 1181757  | 52121   | 2.152  |      | M    |      |
| Total |           | 54916434 | 2509898 |        |      |      |      |

**3l: OD-H, *n*-Hexane/*i*-PrOH = 97/3, rate = 0.8 mL/min, 254 nm**

**<Chromatogram>**

mV

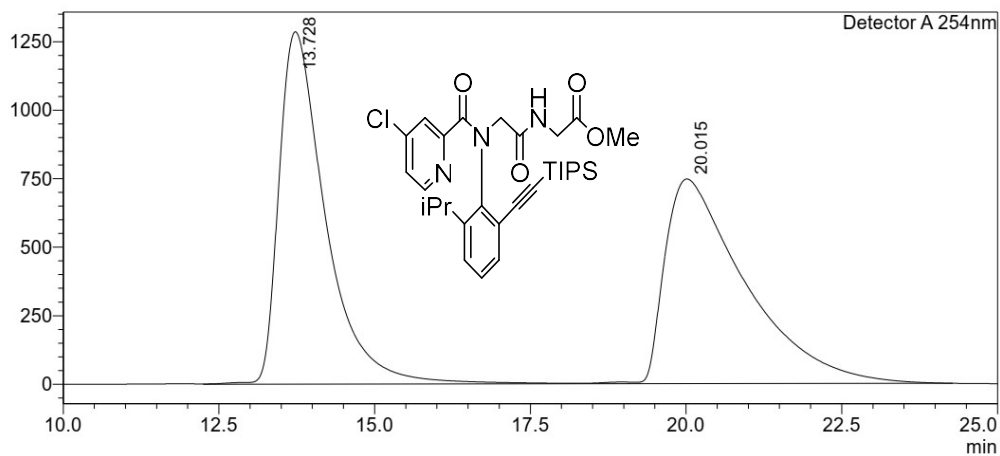

**<Peak Table>**

Detector A 254nm

| Peak# | Ret. Time | Area      | Height  | Conc.  | Unit | Mark | Name |
|-------|-----------|-----------|---------|--------|------|------|------|
| 1     | 13.728    | 67027140  | 1285470 | 49.915 |      | M    |      |
| 2     | 20.015    | 67255811  | 746640  | 50.085 |      | V M  |      |
| Total |           | 134282951 | 2032111 |        |      |      |      |

**<Chromatogram>**

mV

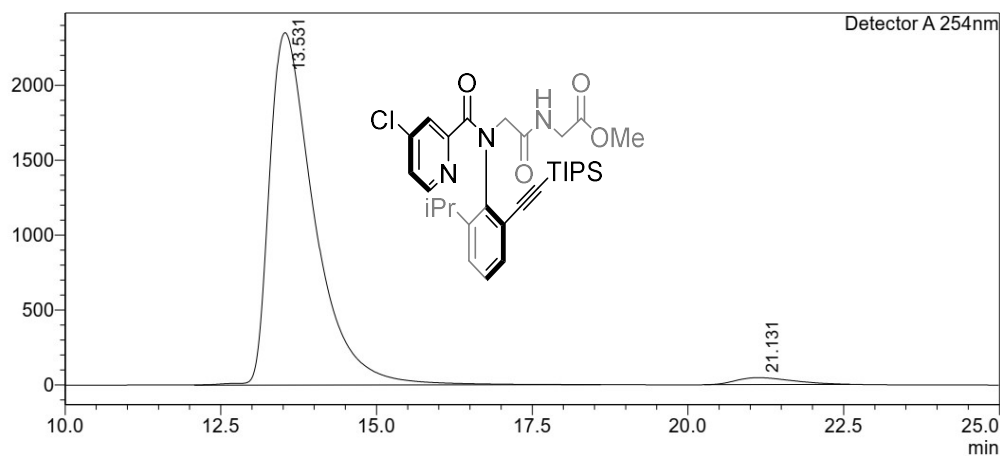

**<Peak Table>**

Detector A 254nm

| Peak# | Ret. Time | Area      | Height  | Conc.  | Unit | Mark | Name |
|-------|-----------|-----------|---------|--------|------|------|------|
| 1     | 13.531    | 117863950 | 2351847 | 97.571 |      | M    |      |
| 2     | 21.131    | 2934090   | 46352   | 2.429  |      | M    |      |
| Total |           | 120798040 | 2398199 |        |      |      |      |

5a: IC, *n*-Hexane/*i*-PrOH = 80/20, rate = 0.8 mL/min, 254 nm

<Chromatogram>

mV

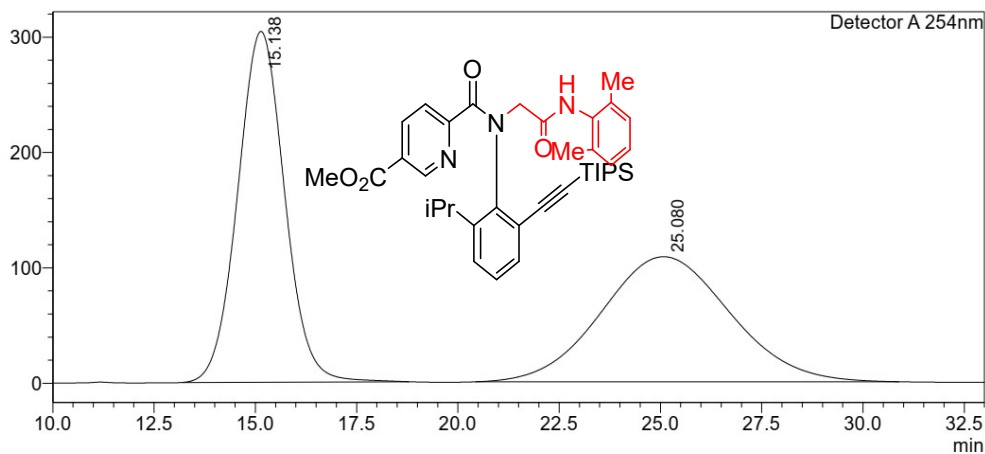

<Peak Table>

Detector A 254nm

| Peak# | Ret. Time | Area     | Height | Conc.  | Unit | Mark | Name |
|-------|-----------|----------|--------|--------|------|------|------|
| 1     | 15.138    | 24481658 | 304070 | 50.457 |      | M    |      |
| 2     | 25.080    | 24038573 | 108389 | 49.543 |      | M    |      |
| Total |           | 48520231 | 412459 |        |      |      |      |

<Chromatogram>

mV

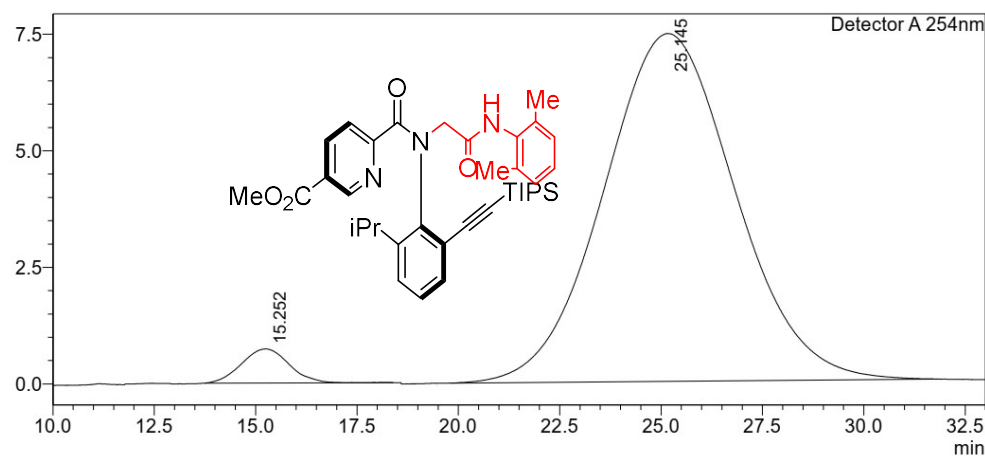

<Peak Table>

Detector A 254nm

| Peak# | Ret. Time | Area    | Height | Conc.  | Unit | Mark | Name |
|-------|-----------|---------|--------|--------|------|------|------|
| 1     | 15.252    | 59704   | 732    | 3.428  |      | M    |      |
| 2     | 25.145    | 1682116 | 7459   | 96.572 |      | M    |      |
| Total |           | 1741820 | 8191   |        |      |      |      |

5b: IC, *n*-Hexane/*i*-PrOH = 80/20, rate = 0.8 mL/min, 254 nm

<Chromatogram>

mV

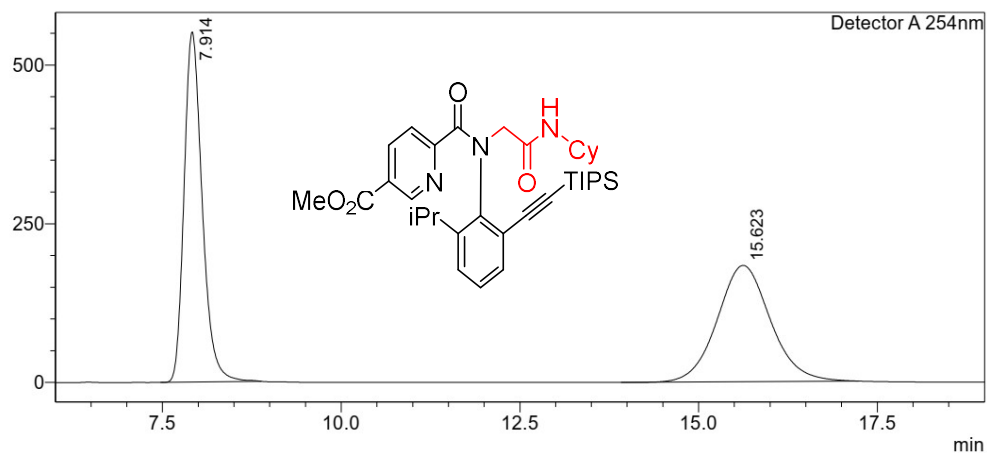

<Peak Table>

Detector A 254nm

| Peak# | Ret. Time | Area     | Height | Conc.  | Unit | Mark | Name |
|-------|-----------|----------|--------|--------|------|------|------|
| 1     | 7.914     | 9731556  | 551509 | 50.580 |      | M    |      |
| 2     | 15.623    | 9508451  | 183369 | 49.420 |      | M    |      |
| Total |           | 19240007 | 734878 |        |      |      |      |

<Chromatogram>

mV

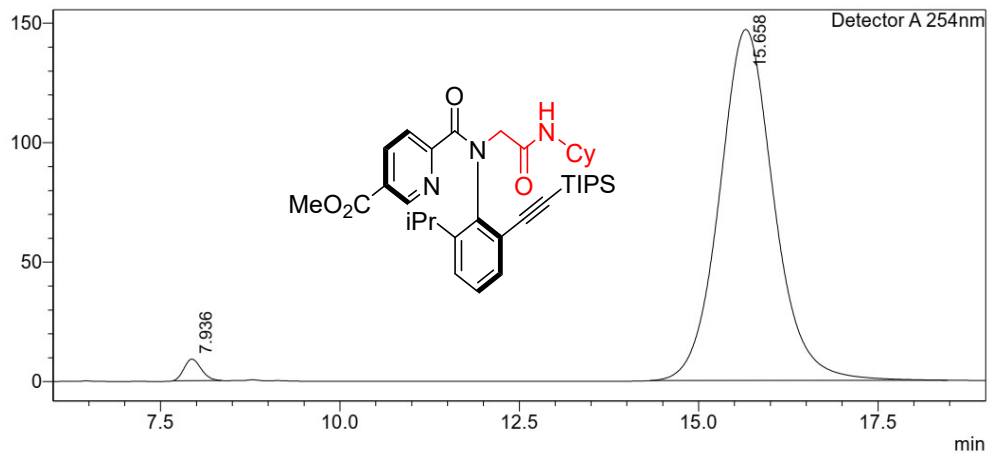

<Peak Table>

Detector A 254nm

| Peak# | Ret. Time | Area    | Height | Conc.  | Unit | Mark | Name |
|-------|-----------|---------|--------|--------|------|------|------|
| 1     | 7.936     | 151237  | 9065   | 1.914  |      | M    |      |
| 2     | 15.658    | 7750249 | 146927 | 98.086 |      | M    |      |
| Total |           | 7901486 | 155992 |        |      |      |      |

5c: AD-H, *n*-Hexane/*i*-PrOH= 80/20, rate = 0.8 mL/min, 254nm

<Chromatogram>

mV

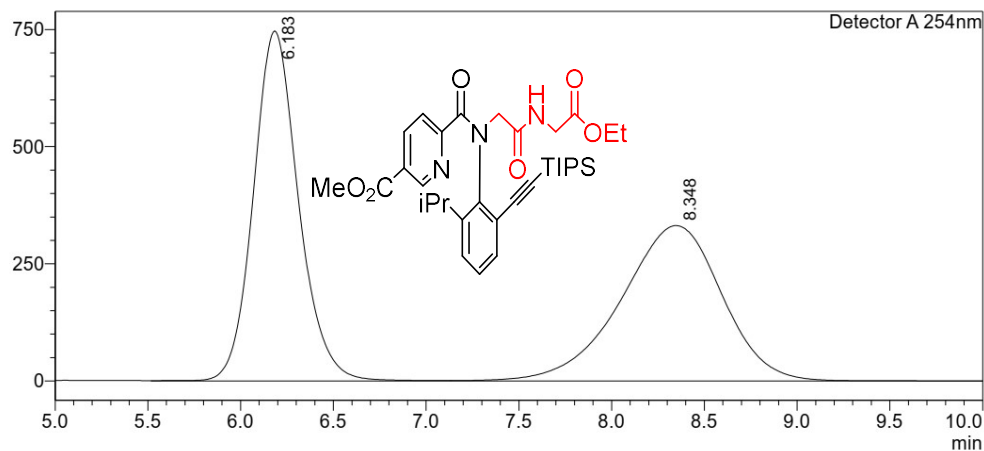

<Peak Table>

Detector A 254nm

| Peak# | Ret. Time | Area     | Height  | Conc.  | Unit | Mark | Name |
|-------|-----------|----------|---------|--------|------|------|------|
| 1     | 6.183     | 12640384 | 746845  | 50.159 |      |      |      |
| 2     | 8.348     | 12560144 | 331532  | 49.841 |      | V    |      |
| Total |           | 25200528 | 1078378 |        |      |      |      |

<Chromatogram>

mV

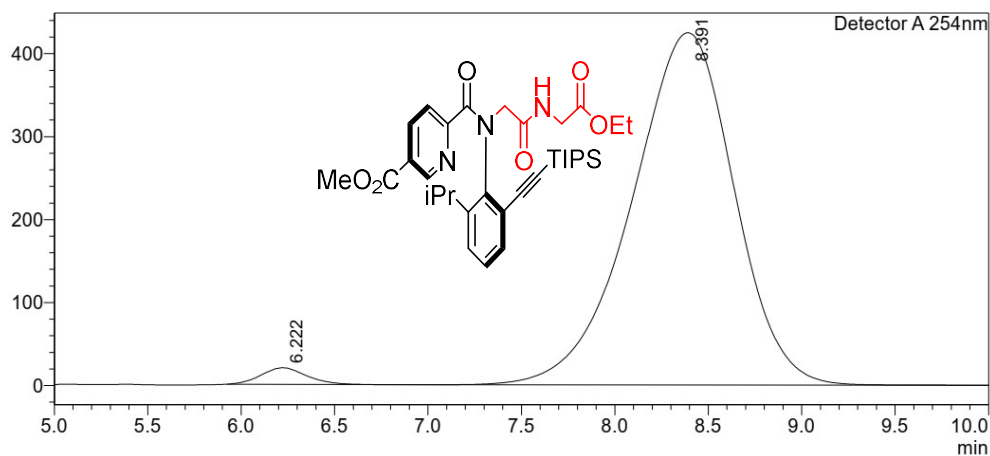

<Peak Table>

Detector A 254nm

| Peak# | Ret. Time | Area     | Height | Conc.  | Unit | Mark | Name |
|-------|-----------|----------|--------|--------|------|------|------|
| 1     | 6.222     | 328831   | 19877  | 1.994  |      | S M  |      |
| 2     | 8.391     | 16159450 | 424514 | 98.006 |      |      |      |
| Total |           | 16488281 | 444392 |        |      |      |      |

5d: AD-H, *n*-Hexane/*i*-PrOH = 97/3, rate = 0.8 mL/min, 254 nm

<Chromatogram>

mV

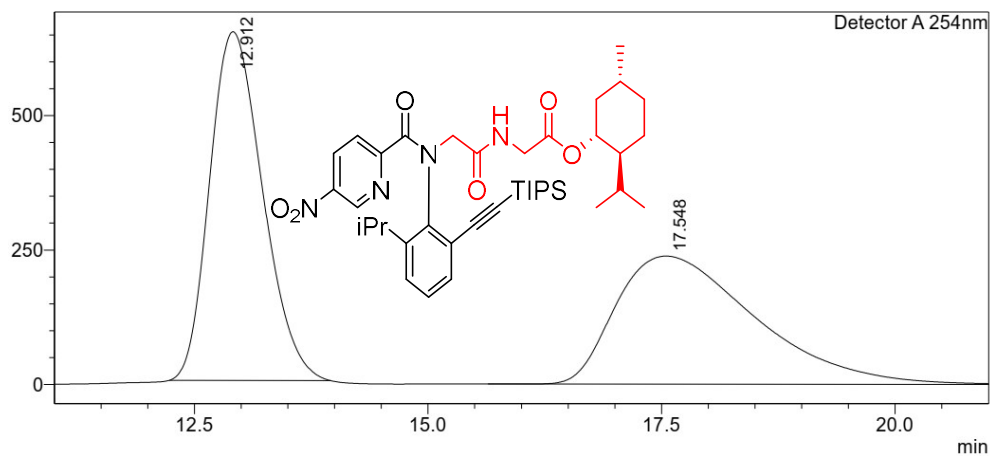

<Peak Table>

Detector A 254nm

| Peak# | Ret. Time | Area     | Height | Conc.  | Unit | Mark | Name |
|-------|-----------|----------|--------|--------|------|------|------|
| 1     | 12.912    | 25572125 | 648382 | 50.893 |      | M    |      |
| 2     | 17.548    | 24675053 | 238003 | 49.107 |      | M    |      |
| Total |           | 50247178 | 886385 |        |      |      |      |

<Chromatogram>

mV

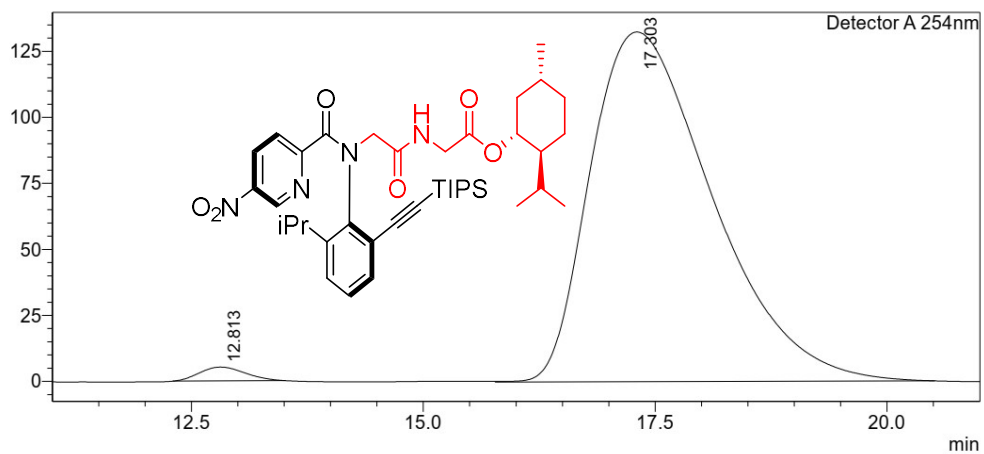

<Peak Table>

Detector A 254nm

| Peak# | Ret. Time | Area     | Height | Conc.  | Unit | Mark | Name |
|-------|-----------|----------|--------|--------|------|------|------|
| 1     | 12.813    | 180517   | 5251   | 1.467  |      | M    |      |
| 2     | 17.303    | 12125097 | 132421 | 98.533 |      | M    |      |
| Total |           | 12305614 | 137672 |        |      |      |      |



5e: AD-H, *n*-Hexane/ *i*-PrOH = 80/20, rate = 0.8 mL/min, 254nm

<Chromatogram>

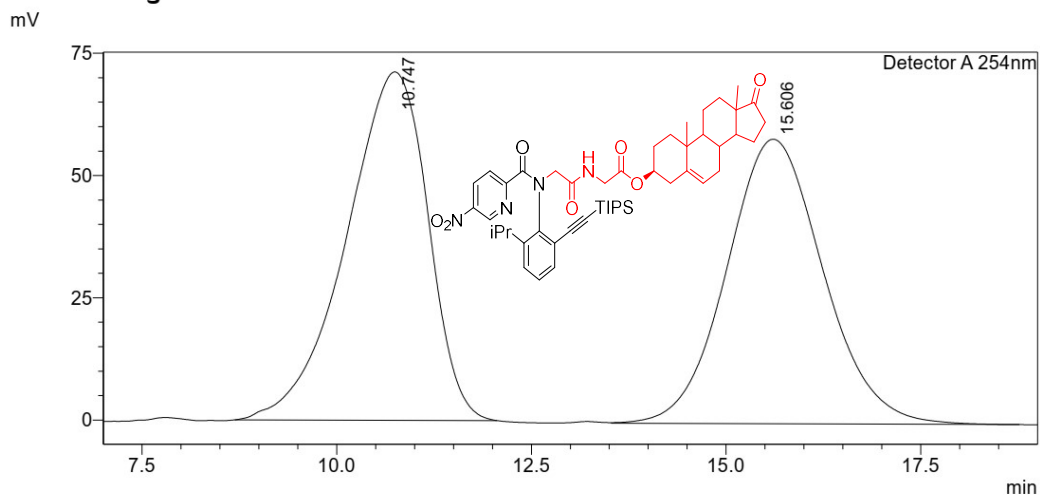

<Peak Table>

Detector A 254nm

| Peak# | Ret. Time | Area     | Height | Conc.  | Unit | Mark | Name |
|-------|-----------|----------|--------|--------|------|------|------|
| 1     | 10.747    | 5182284  | 71238  | 50.821 |      | M    |      |
| 2     | 15.606    | 5014916  | 58194  | 49.179 |      |      |      |
| Total |           | 10197200 | 129432 |        |      |      |      |

<Chromatogram>

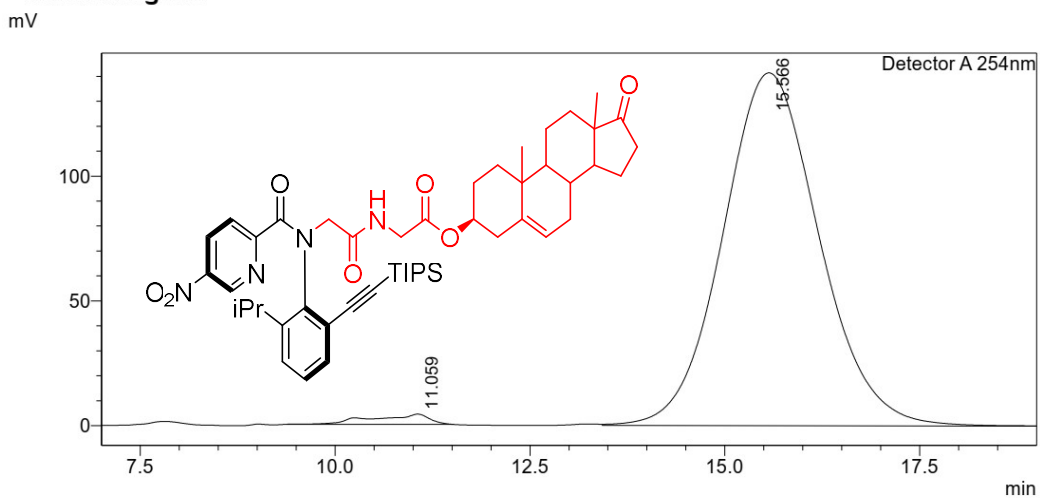

<Peak Table>

Detector A 254nm

| Peak# | Ret. Time | Area     | Height | Conc.  | Unit | Mark | Name |
|-------|-----------|----------|--------|--------|------|------|------|
| 1     | 11.059    | 206985   | 4134   | 1.675  |      | M    |      |
| 2     | 15.566    | 12147668 | 141389 | 98.325 |      |      |      |
| Total |           | 12354654 | 145523 |        |      |      |      |

5f: OD-H, *n*-Hexane/*i*-PrOH = 95/5, rate = 0.8 mL/min, 254 nm

<Chromatogram>

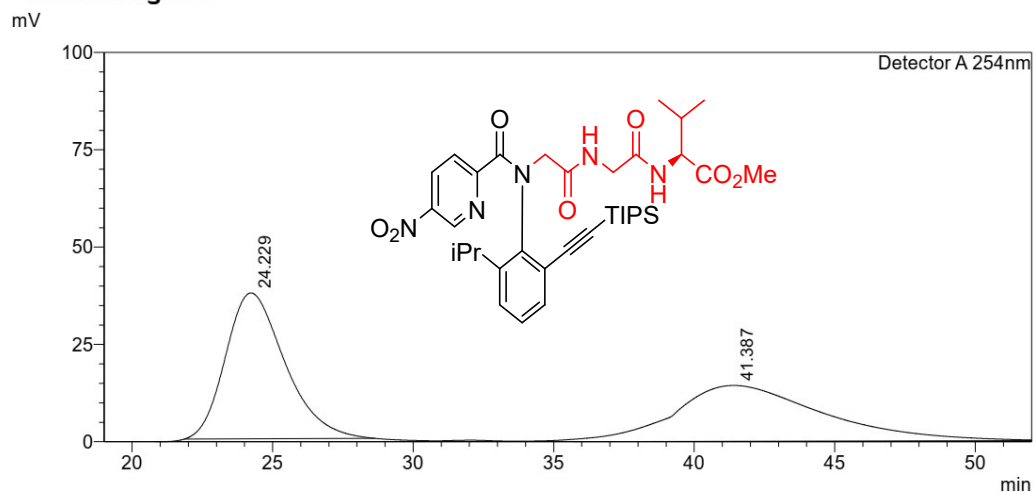

<Peak Table>

| Detector A 254nm |           |          |        |        |      |      |      |
|------------------|-----------|----------|--------|--------|------|------|------|
| Peak#            | Ret. Time | Area     | Height | Conc.  | Unit | Mark | Name |
| 1                | 24.229    | 5523831  | 37500  | 50.441 |      | M    |      |
| 2                | 41.387    | 5427226  | 14386  | 49.559 |      | M    |      |
| Total            |           | 10951056 | 51886  |        |      |      |      |

<Chromatogram>

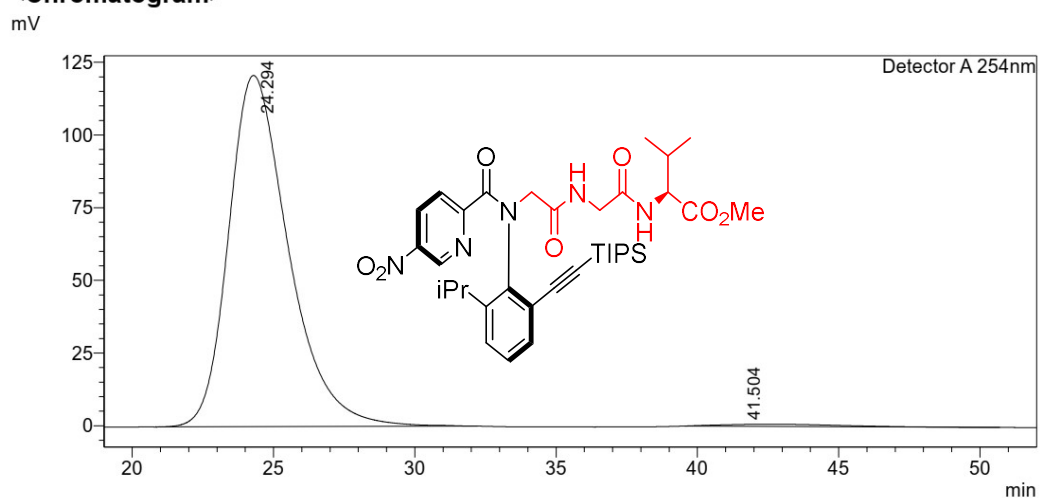

<Peak Table>

| Detector A 254nm |           |          |        |        |      |      |      |
|------------------|-----------|----------|--------|--------|------|------|------|
| Peak#            | Ret. Time | Area     | Height | Conc.  | Unit | Mark | Name |
| 1                | 24.294    | 17846584 | 120801 | 98.757 |      | M    |      |
| 2                | 41.504    | 224711   | 618    | 1.243  |      | M    |      |
| Total            |           | 18071295 | 121419 |        |      |      |      |

5g: OD-H, *n*-Hexane/*i*-PrOH = 80/20, rate = 0.8 mL/min, 254 nm

<Chromatogram>

mV

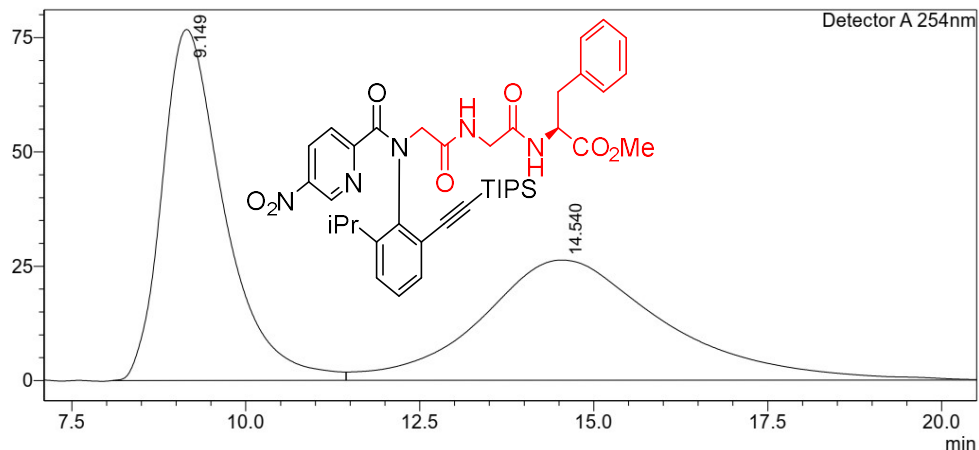

<Peak Table>

Detector A 254nm

| Peak# | Ret. Time | Area    | Height | Conc.  | Unit | Mark | Name |
|-------|-----------|---------|--------|--------|------|------|------|
| 1     | 9.149     | 4778837 | 76760  | 49.827 |      | M    |      |
| 2     | 14.540    | 4812068 | 26286  | 50.173 |      | V M  |      |
| Total |           | 9590904 | 103046 |        |      |      |      |

<Chromatogram>

mV

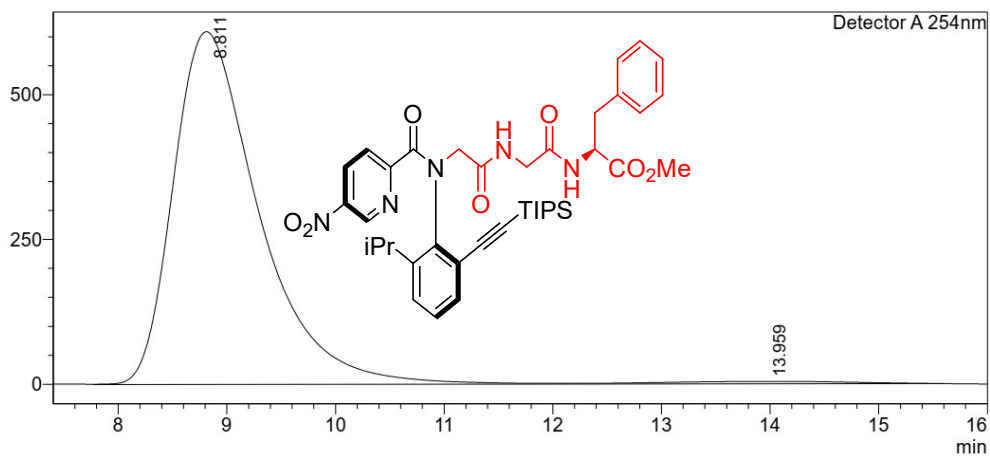

<Peak Table>

Detector A 254nm

| Peak# | Ret. Time | Area     | Height | Conc.  | Unit | Mark | Name |
|-------|-----------|----------|--------|--------|------|------|------|
| 1     | 8.811     | 33415587 | 608953 | 98.488 |      |      |      |
| 2     | 13.959    | 513068   | 4015   | 1.512  |      | V M  |      |
| Total |           | 33928655 | 612968 |        |      |      |      |

5h: OD-H, *n*-Hexane/*i*-PrOH = 80/20, rate = 0.8 mL/min, 254nm

<Chromatogram>

mV

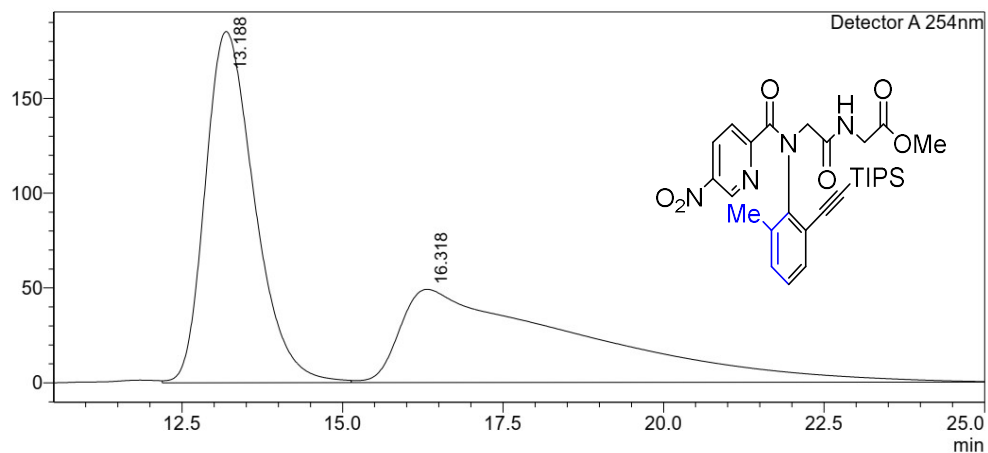

<Peak Table>

Detector A 254nm

| Peak# | Ret. Time | Area     | Height | Conc.  | Unit | Mark | Name |
|-------|-----------|----------|--------|--------|------|------|------|
| 1     | 13.188    | 9889075  | 185167 | 50.751 |      | M    |      |
| 2     | 16.318    | 9596218  | 49178  | 49.249 |      | V M  |      |
| Total |           | 19485293 | 234344 |        |      |      |      |

<Chromatogram>

mV

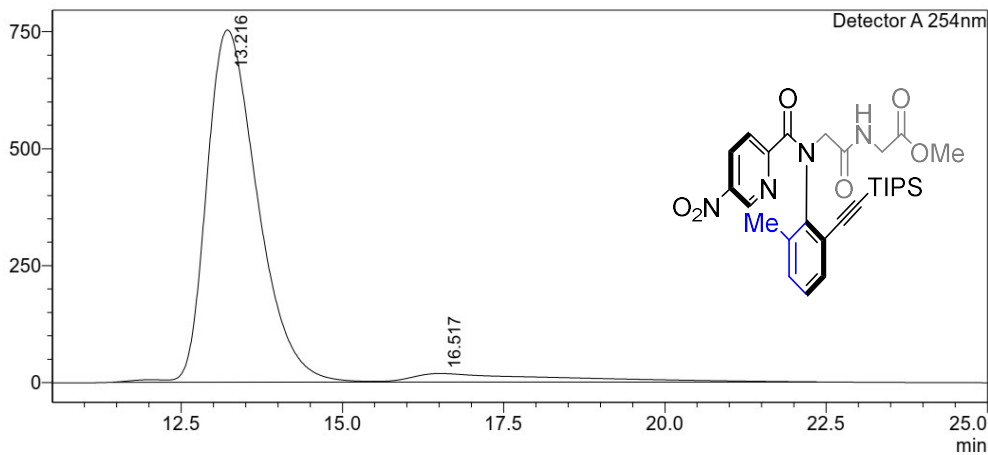

<Peak Table>

Detector A 254nm

| Peak# | Ret. Time | Area     | Height | Conc.  | Unit | Mark | Name |
|-------|-----------|----------|--------|--------|------|------|------|
| 1     | 13.216    | 41190281 | 752920 | 93.260 |      | M    |      |
| 2     | 16.517    | 2976871  | 18361  | 6.740  |      | V M  |      |
| Total |           | 44167151 | 771281 |        |      |      |      |

5i: OD-H, *n*-Hexane/*i*-PrOH = 80/20, rate = 0.8 mL/min, 254 nm

<Chromatogram>

mV

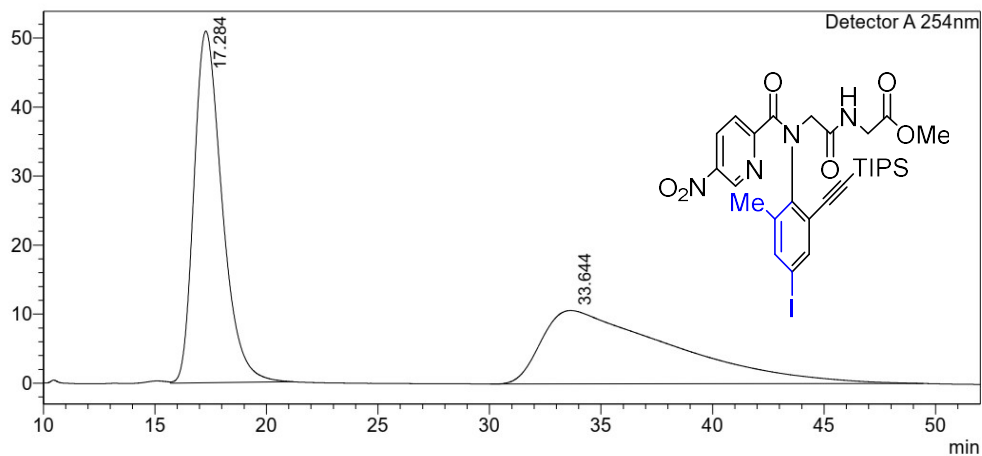

<Peak Table>

Detector A 254nm

| Peak# | Ret. Time | Area    | Height | Conc.  | Unit | Mark | Name |
|-------|-----------|---------|--------|--------|------|------|------|
| 1     | 17.284    | 4460947 | 50938  | 50.776 |      | M    |      |
| 2     | 33.644    | 4324680 | 10629  | 49.224 |      | M    |      |
| Total |           | 8785626 | 61567  |        |      |      |      |

<Chromatogram>

mV

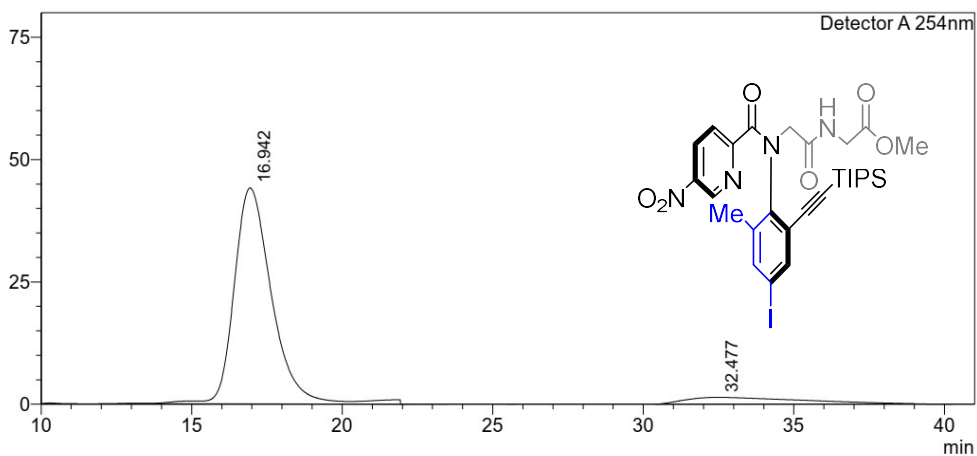

<Peak Table>

Detector A 254nm

| Peak# | Ret. Time | Area    | Height | Conc.  | Unit | Mark | Name |
|-------|-----------|---------|--------|--------|------|------|------|
| 1     | 16.942    | 3878017 | 44147  | 91.344 |      | M    |      |
| 2     | 32.477    | 367512  | 1378   | 8.656  |      | M    |      |
| Total |           | 4245529 | 45525  |        |      |      |      |

5j: OD-H, *n*-Hexane/*i*-PrOH = 80/20, rate = 1.0 mL/min, 254 nm

<Chromatogram>

mV

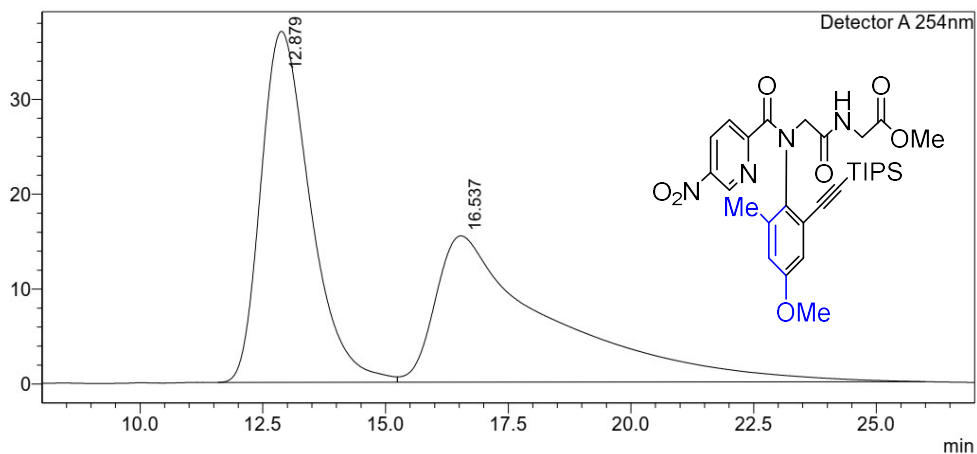

<Peak Table>

Detector A 254nm

| Peak# | Ret. Time | Area    | Height | Conc.  | Unit | Mark | Name |
|-------|-----------|---------|--------|--------|------|------|------|
| 1     | 12.879    | 2582973 | 36976  | 50.370 |      |      |      |
| 2     | 16.537    | 2545042 | 15413  | 49.630 |      | V    |      |
| Total |           | 5128016 | 52389  |        |      |      |      |

<Chromatogram>

mV

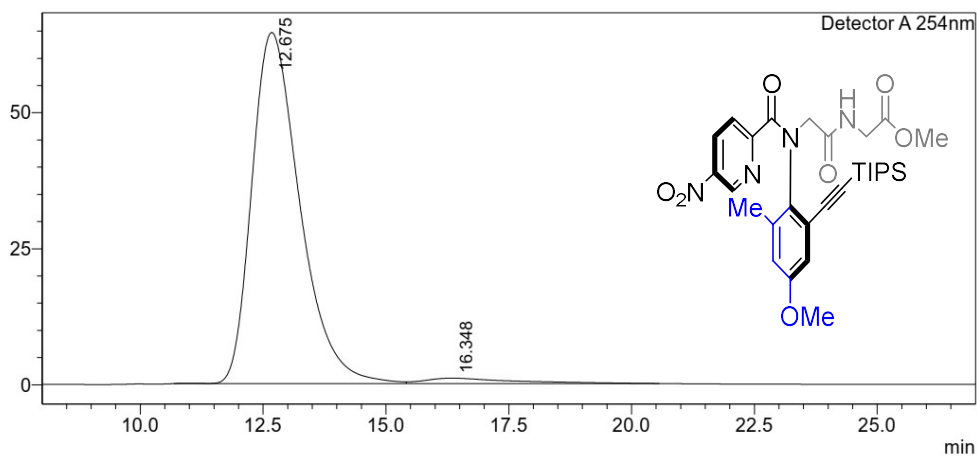

<Peak Table>

Detector A 254nm

| Peak# | Ret. Time | Area    | Height | Conc.  | Unit | Mark | Name |
|-------|-----------|---------|--------|--------|------|------|------|
| 1     | 12.675    | 4386526 | 64532  | 97.162 |      | M    |      |
| 2     | 16.348    | 128118  | 1003   | 2.838  |      | V M  |      |
| Total |           | 4514644 | 65534  |        |      |      |      |

5k: AD-H, *n*-Hexane/*i*-PrOH = 80/20, rate = 0.8 mL/min, 254nm

<Chromatogram>

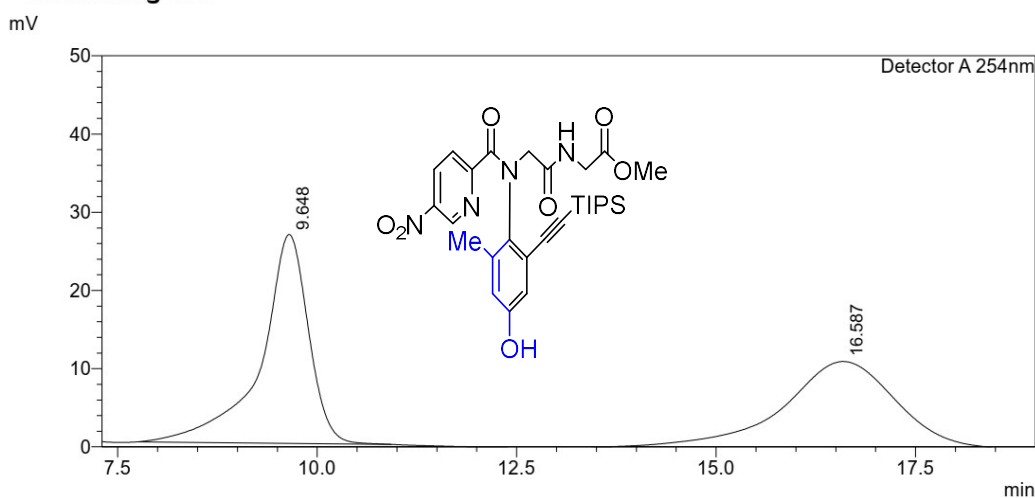

<Peak Table>

Detector A 254nm

| Peak# | Ret. Time | Area    | Height | Conc.  | Unit | Mark | Name |
|-------|-----------|---------|--------|--------|------|------|------|
| 1     | 9.648     | 1111998 | 26703  | 50.439 |      | M    |      |
| 2     | 16.587    | 1092632 | 11062  | 49.561 |      |      |      |
| Total |           | 2204631 | 37764  |        |      |      |      |

<Chromatogram>

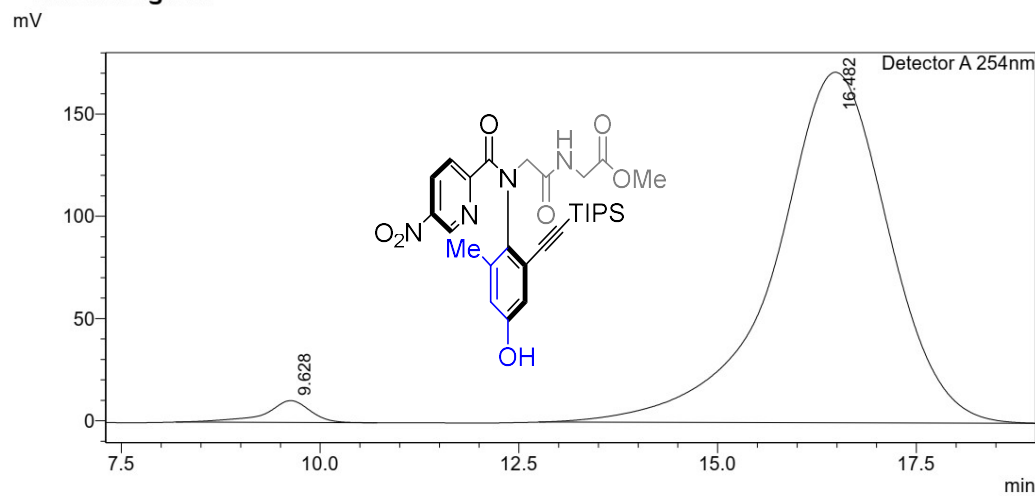

<Peak Table>

Detector A 254nm

| Peak# | Ret. Time | Area     | Height | Conc.  | Unit | Mark | Name |
|-------|-----------|----------|--------|--------|------|------|------|
| 1     | 9.628     | 423331   | 10681  | 2.425  |      | M    |      |
| 2     | 16.482    | 17031794 | 171501 | 97.575 |      | M    |      |
| Total |           | 17455125 | 182182 |        |      |      |      |

5l: OD-H, *n*-Hexane/*i*-PrOH = 80/20, rate = 0.8 mL/min, 254nm

<Chromatogram>

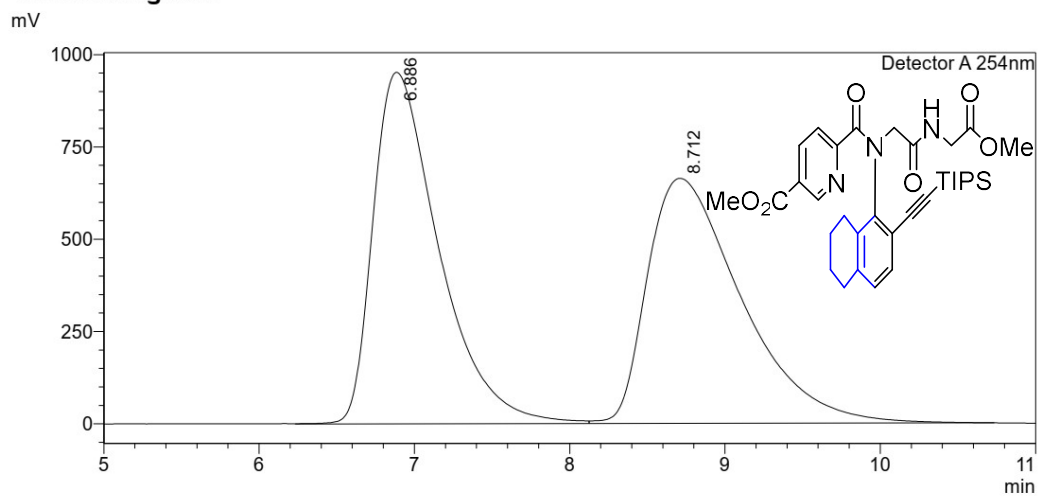

<Peak Table>

Detector A 254nm

| Peak# | Ret. Time | Area     | Height  | Conc.  | Unit | Mark | Name |
|-------|-----------|----------|---------|--------|------|------|------|
| 1     | 6.886     | 28005533 | 952042  | 50.080 |      |      |      |
| 2     | 8.712     | 27916549 | 663761  | 49.920 |      | V M  |      |
| Total |           | 55922082 | 1615804 |        |      |      |      |

<Chromatogram>

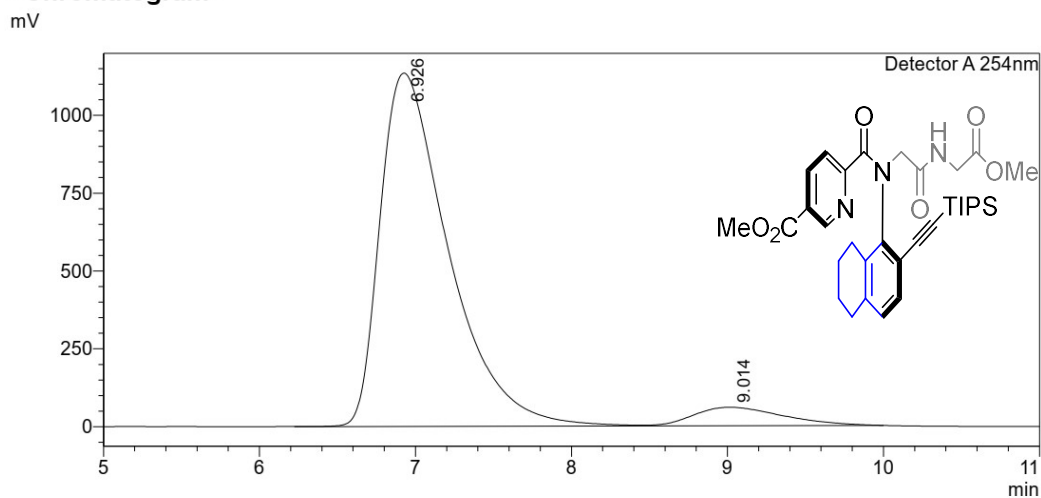

<Peak Table>

Detector A 254nm

| Peak# | Ret. Time | Area     | Height  | Conc.  | Unit | Mark | Name |
|-------|-----------|----------|---------|--------|------|------|------|
| 1     | 6.926     | 34663841 | 1134875 | 93.587 |      |      |      |
| 2     | 9.014     | 2375508  | 59494   | 6.413  |      | V M  |      |
| Total |           | 37039349 | 1194369 |        |      |      |      |



5m: AD-H, *n*-Hexane/*i*-PrOH = 80/20, rate = 0.8 mL/min, 254nm

<Chromatogram>

mV

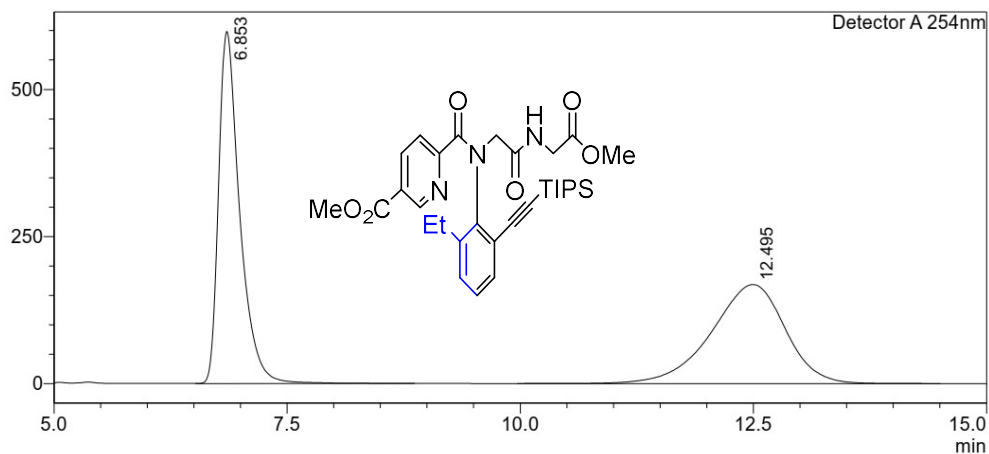

<Peak Table>

Detector A 254nm

| Peak# | Ret. Time | Area     | Height | Conc.  | Unit | Mark | Name |
|-------|-----------|----------|--------|--------|------|------|------|
| 1     | 6.853     | 9424931  | 598239 | 50.321 |      | M    |      |
| 2     | 12.495    | 9304737  | 168259 | 49.679 |      |      |      |
| Total |           | 18729669 | 766498 |        |      |      |      |

<Chromatogram>

mV

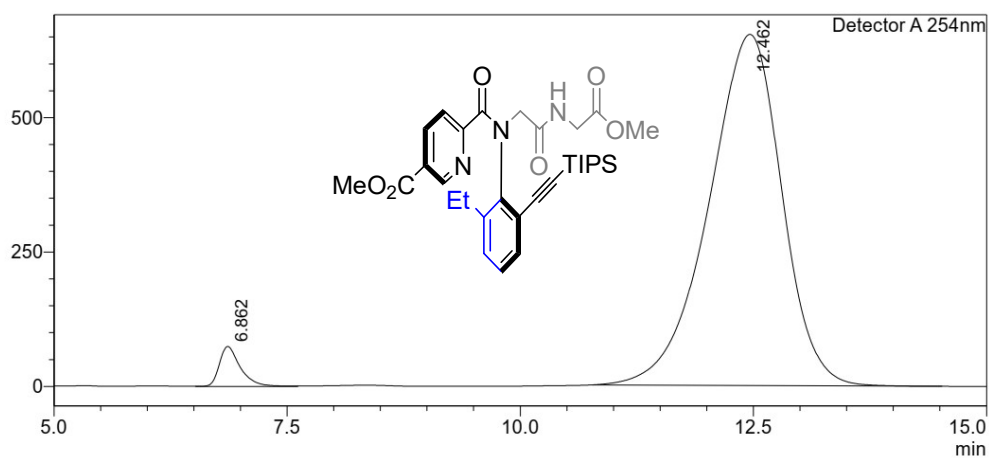

<Peak Table>

Detector A 254nm

| Peak# | Ret. Time | Area     | Height | Conc.  | Unit | Mark | Name |
|-------|-----------|----------|--------|--------|------|------|------|
| 1     | 6.862     | 1155627  | 74178  | 3.151  |      |      |      |
| 2     | 12.462    | 35518463 | 653108 | 96.849 |      | M    |      |
| Total |           | 36674090 | 727286 |        |      |      |      |

5n: AD-H, *n*-Hexane/*i*-PrOH = 80/20, rate = 0.8 mL/min, 254nm

<Chromatogram>

mV

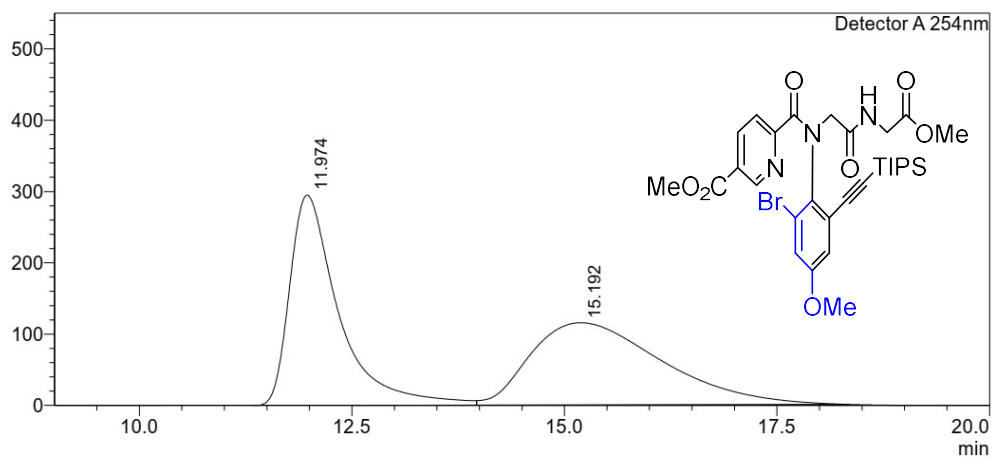

<Peak Table>

Detector A 254nm

| Peak# | Ret. Time | Area     | Height | Conc.  | Unit | Mark | Name |
|-------|-----------|----------|--------|--------|------|------|------|
| 1     | 11.974    | 11888348 | 295069 | 48.973 |      | M    |      |
| 2     | 15.192    | 12387189 | 115235 | 51.027 |      | V M  |      |
| Total |           | 24275536 | 410304 |        |      |      |      |

<Chromatogram>

mV

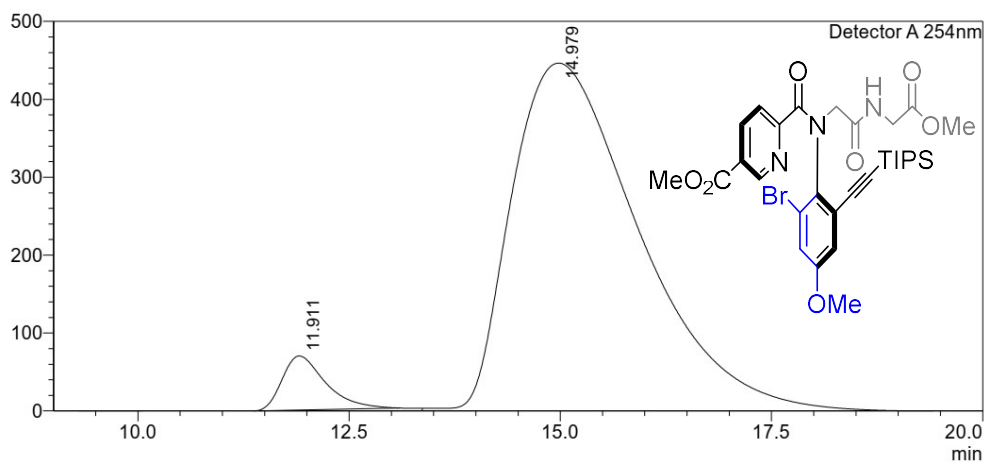

<Peak Table>

Detector A 254nm

| Peak# | Ret. Time | Area     | Height | Conc.  | Unit | Mark | Name |
|-------|-----------|----------|--------|--------|------|------|------|
| 1     | 11.911    | 2509754  | 69695  | 5.068  |      | M    |      |
| 2     | 14.979    | 47007345 | 447261 | 94.932 |      |      |      |
| Total |           | 49517099 | 516956 |        |      |      |      |

50: OD-H, *n*-Hexane/*i*-PrOH = 95/5, rate = 0.8 mL/min, 254 nm

<Chromatogram>

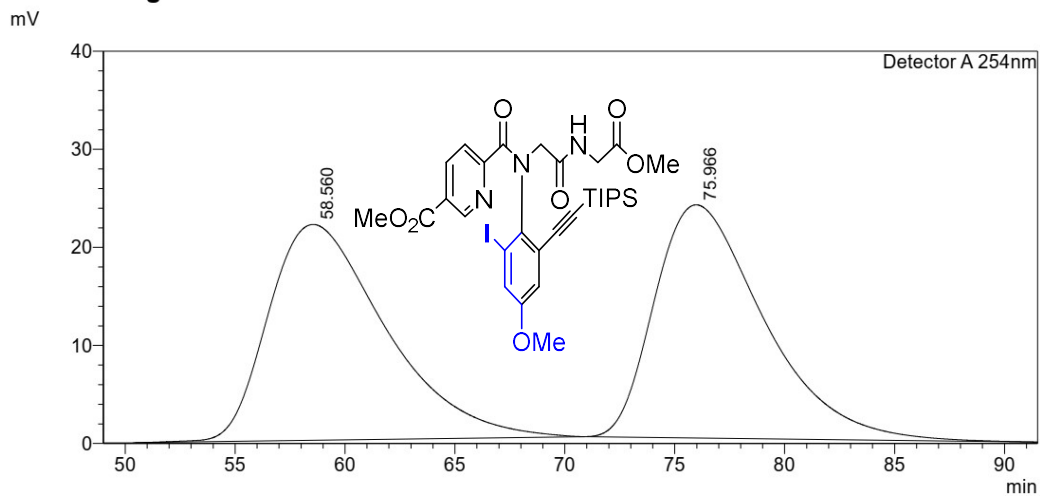

<Peak Table>

Detector A 254nm

| Peak# | Ret. Time | Area     | Height | Conc.  | Unit | Mark | Name |
|-------|-----------|----------|--------|--------|------|------|------|
| 1     | 58.560    | 8178240  | 22016  | 49.833 |      | M    |      |
| 2     | 75.966    | 8233054  | 23769  | 50.167 |      | M    |      |
| Total |           | 16411294 | 45786  |        |      |      |      |

<Chromatogram>

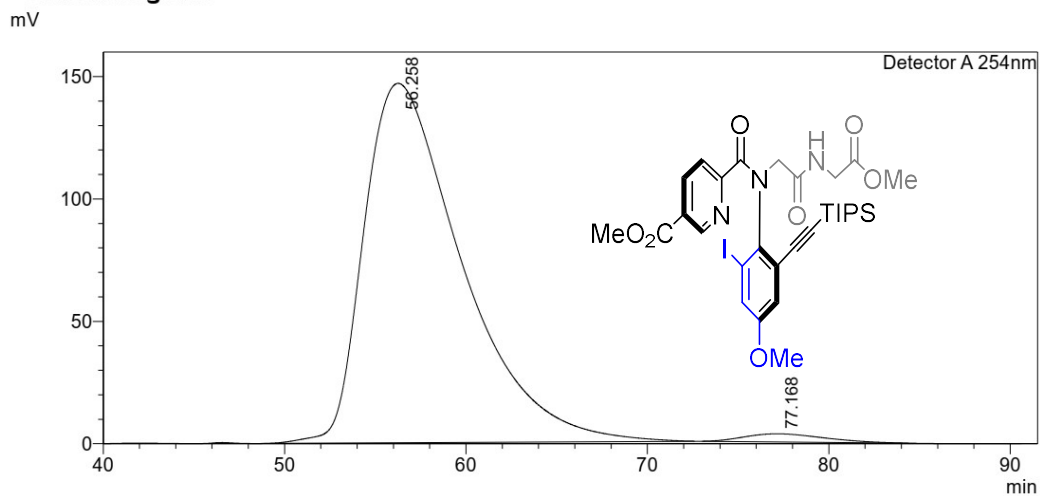

<Peak Table>

Detector A 254nm

| Peak# | Ret. Time | Area     | Height | Conc.  | Unit | Mark | Name |
|-------|-----------|----------|--------|--------|------|------|------|
| 1     | 56.258    | 55080278 | 146846 | 98.209 |      |      |      |
| 2     | 77.168    | 1004577  | 3308   | 1.791  |      | M    |      |
| Total |           | 56084856 | 150154 |        |      |      |      |

5p: AS-H, *n*-Hexane/*i*-PrOH = 80/20, rate = 0.8 mL/min, 254nm

<Chromatogram>

mV

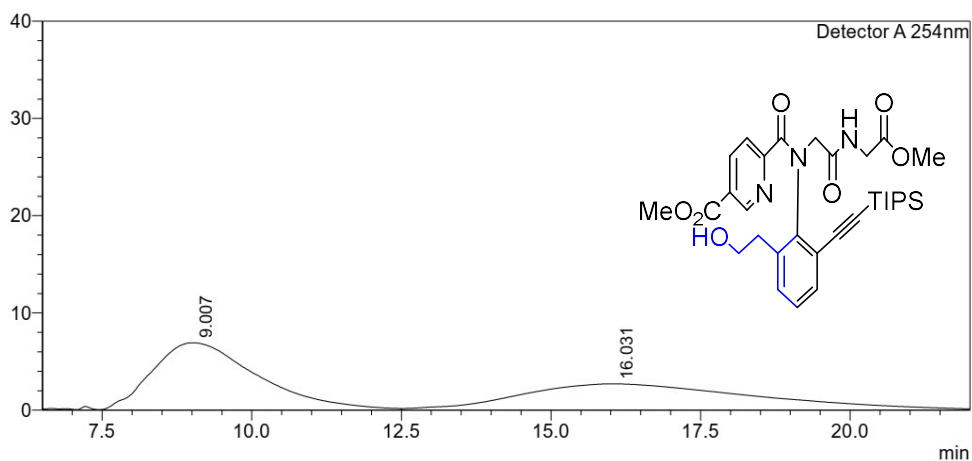

<Peak Table>

Detector A 254nm

| Peak# | Ret. Time | Area    | Height | Conc.  | Unit | Mark | Name |
|-------|-----------|---------|--------|--------|------|------|------|
| 1     | 9.007     | 884493  | 7024   | 50.802 |      |      |      |
| 2     | 16.031    | 856566  | 2852   | 49.198 |      | V M  |      |
| Total |           | 1741059 | 9876   |        |      |      |      |

<Chromatogram>

mV

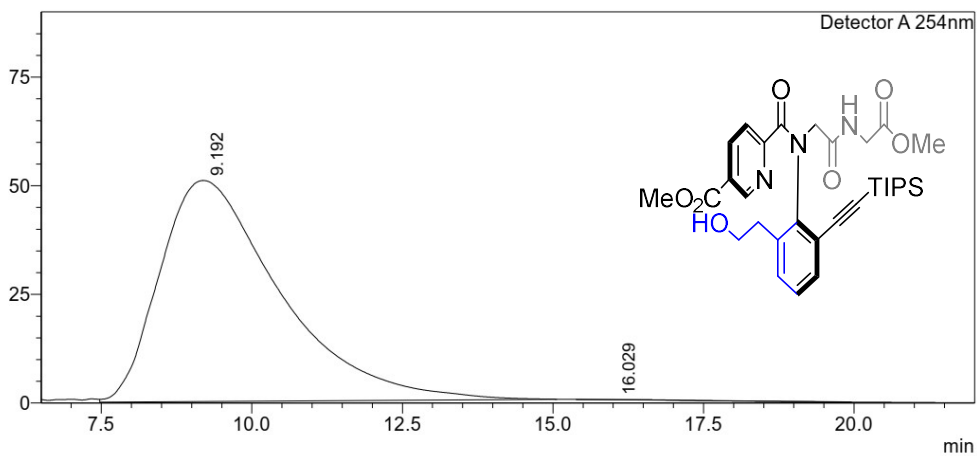

<Peak Table>

Detector A 254nm

| Peak# | Ret. Time | Area    | Height | Conc.  | Unit | Mark | Name |
|-------|-----------|---------|--------|--------|------|------|------|
| 1     | 9.192     | 7072632 | 50861  | 99.952 |      | M    |      |
| 2     | 16.029    | 3371    | 46     | 0.048  |      | M    |      |
| Total |           | 7076002 | 50907  |        |      |      |      |

5q: AD-H, *n*-Hexane/*i*-PrOH = 90/10, rate = 0.8 mL/min, 254nm

<Chromatogram>

mV

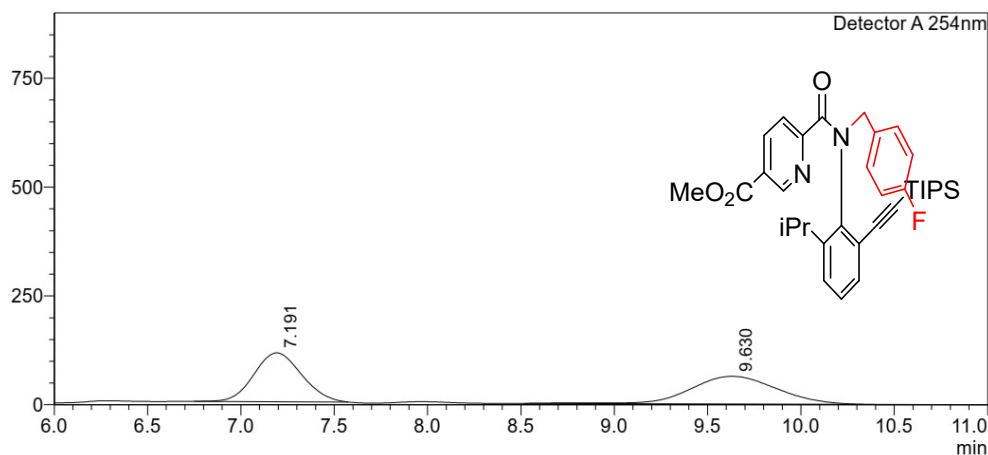

<Peak Table>

Detector A 254nm

| Peak# | Ret. Time | Area    | Height | Conc.  | Unit | Mark | Name |
|-------|-----------|---------|--------|--------|------|------|------|
| 1     | 7.191     | 1995187 | 112176 | 49.655 |      | M    |      |
| 2     | 9.630     | 2022930 | 63511  | 50.345 |      | M    |      |
| Total |           | 4018117 | 175687 |        |      |      |      |

<Chromatogram>

mV

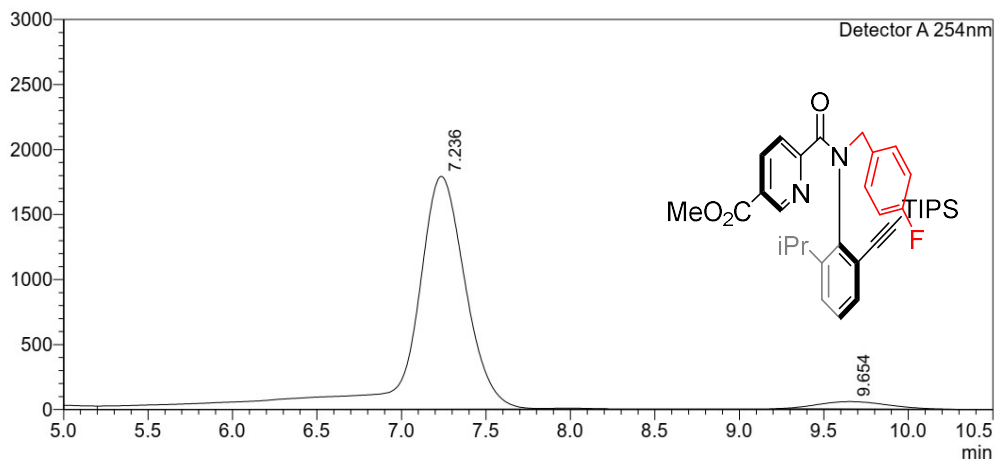

<Peak Table>

Detector A 254nm

| Peak# | Ret. Time | Area     | Height  | Conc.  | Unit | Mark | Name |
|-------|-----------|----------|---------|--------|------|------|------|
| 1     | 7.236     | 40027475 | 1790204 | 96.102 |      | M    |      |
| 2     | 9.654     | 1623423  | 56359   | 3.898  |      | M    |      |
| Total |           | 41650898 | 1846563 |        |      |      |      |

5r: AD-H, *n*-Hexane/*i*-PrOH = 80/20, rate = 0.8 mL/min, 254nm

<Chromatogram>

mV

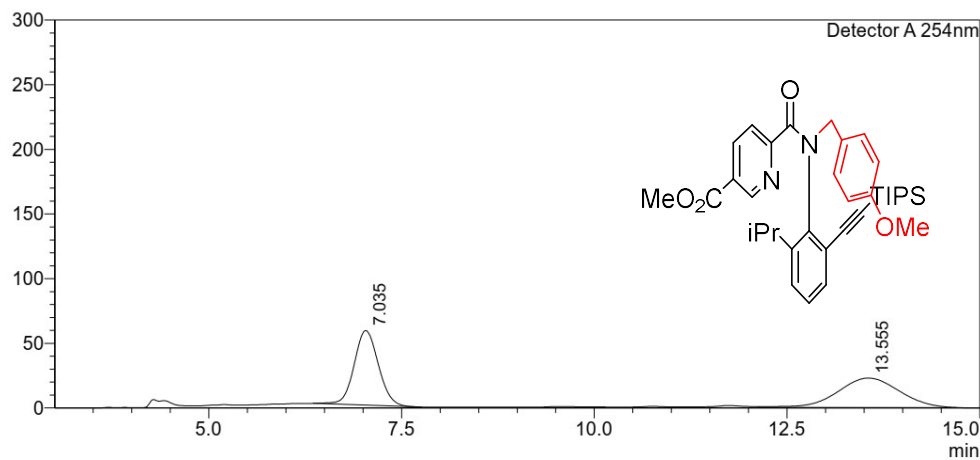

<Peak Table>

Detector A 254nm

| Peak# | Ret. Time | Area    | Height | Conc.  | Unit | Mark | Name |
|-------|-----------|---------|--------|--------|------|------|------|
| 1     | 7.035     | 1263608 | 57692  | 49.908 |      | M    |      |
| 2     | 13.555    | 1268281 | 22753  | 50.092 |      | M    |      |
| Total |           | 2531889 | 80445  |        |      |      |      |

<Chromatogram>

mV

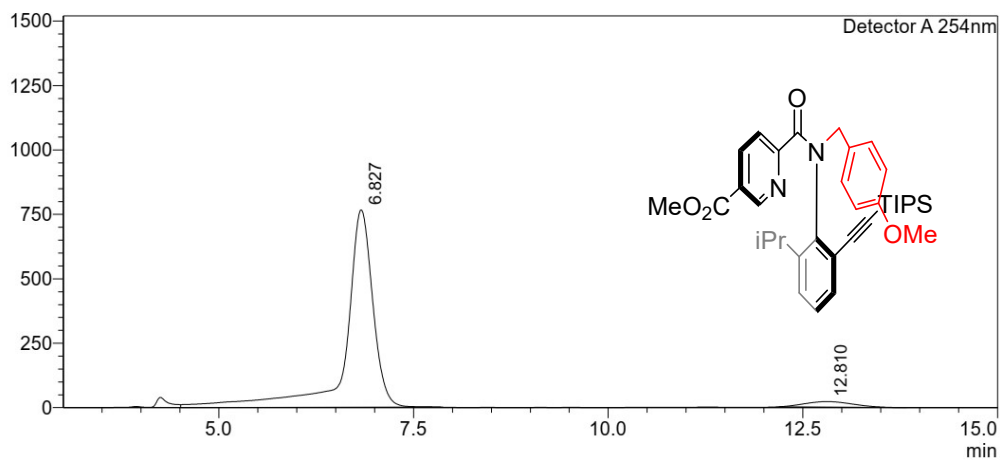

<Peak Table>

Detector A 254nm

| Peak# | Ret. Time | Area     | Height | Conc.  | Unit | Mark | Name |
|-------|-----------|----------|--------|--------|------|------|------|
| 1     | 6.827     | 19180714 | 766185 | 95.407 |      | M    |      |
| 2     | 12.810    | 923475   | 21428  | 4.593  |      | M    |      |
| Total |           | 20104189 | 787613 |        |      |      |      |

5s: AD-H, *n*-Hexane/*i*-PrOH = 90/10, rate = 0.8 mL/min, 254nm

<Chromatogram>

mV

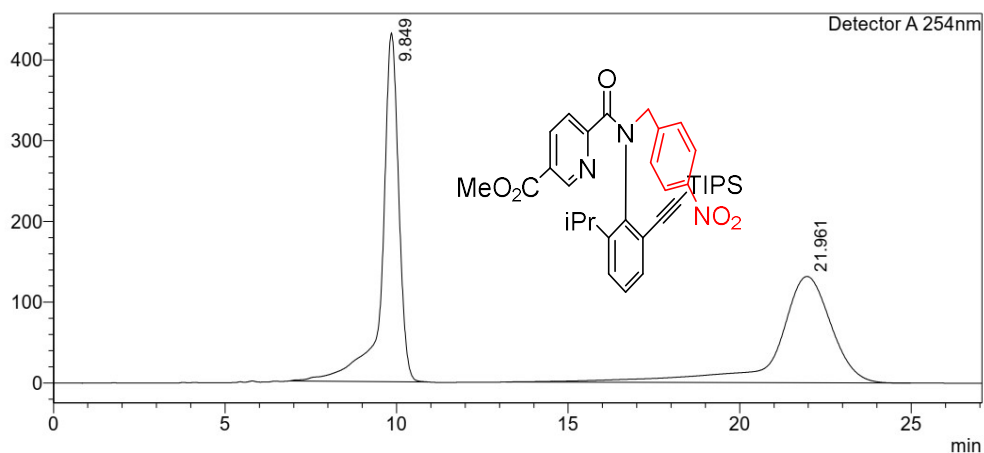

<Peak Table>

Detector A 254nm

| Peak# | Ret. Time | Area     | Height | Conc.  | Unit | Mark | Name |
|-------|-----------|----------|--------|--------|------|------|------|
| 1     | 9.849     | 14631059 | 431515 | 50.423 |      | M    |      |
| 2     | 21.961    | 14385785 | 131635 | 49.577 |      | M    |      |
| Total |           | 29016844 | 563150 |        |      |      |      |

<Chromatogram>

mV

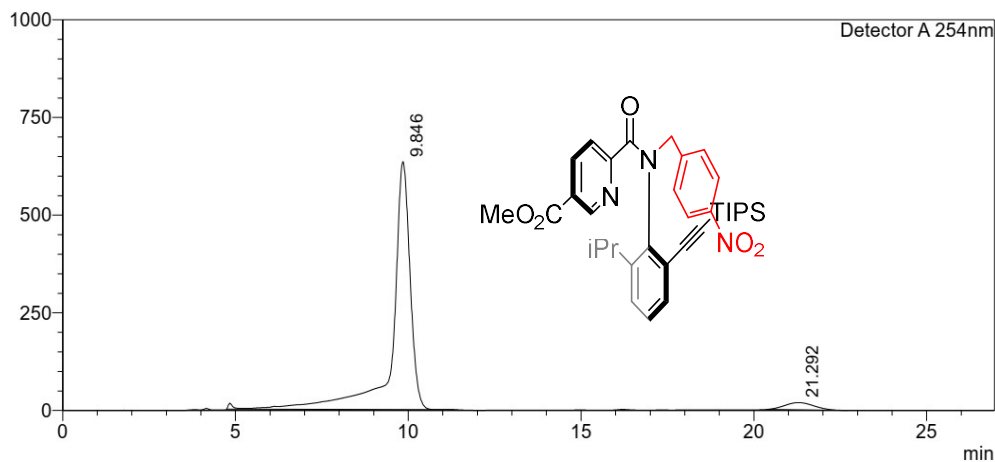

<Peak Table>

Detector A 254nm

| Peak# | Ret. Time | Area     | Height | Conc.  | Unit | Mark | Name |
|-------|-----------|----------|--------|--------|------|------|------|
| 1     | 9.846     | 23146664 | 634254 | 95.593 |      | M    |      |
| 2     | 21.292    | 1067069  | 18300  | 4.407  |      | M    |      |
| Total |           | 24213733 | 652554 |        |      |      |      |

3ha: OD-H, *n*-Hexane/*i*-PrOH = 80/20, rate = 0.8 mL/min, 254nm

<Chromatogram>

mV

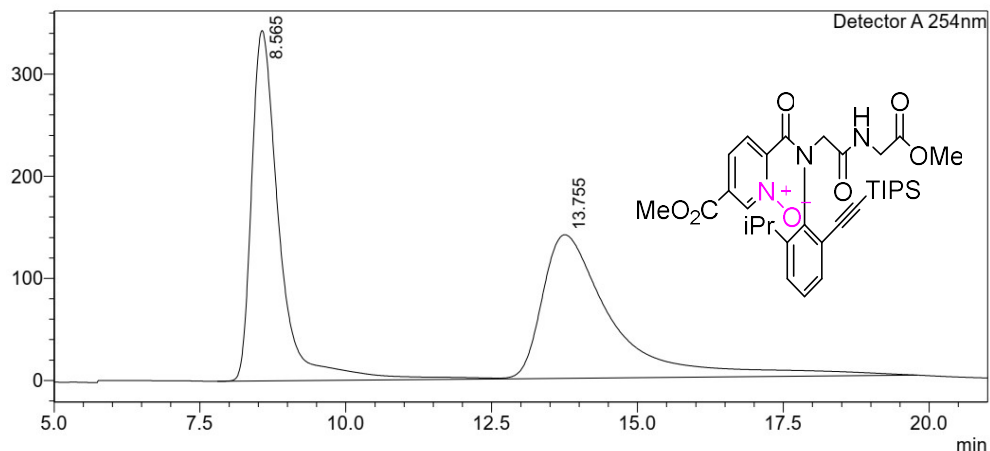

<Peak Table>

Detector A 254nm

| Peak# | Ret. Time | Area     | Height | Conc.  | Unit | Mark | Name |
|-------|-----------|----------|--------|--------|------|------|------|
| 1     | 8.565     | 11385802 | 343096 | 49.019 |      | M    |      |
| 2     | 13.755    | 11841728 | 140546 | 50.981 |      | V M  |      |
| Total |           | 23227529 | 483642 |        |      |      |      |

<Chromatogram>

mV

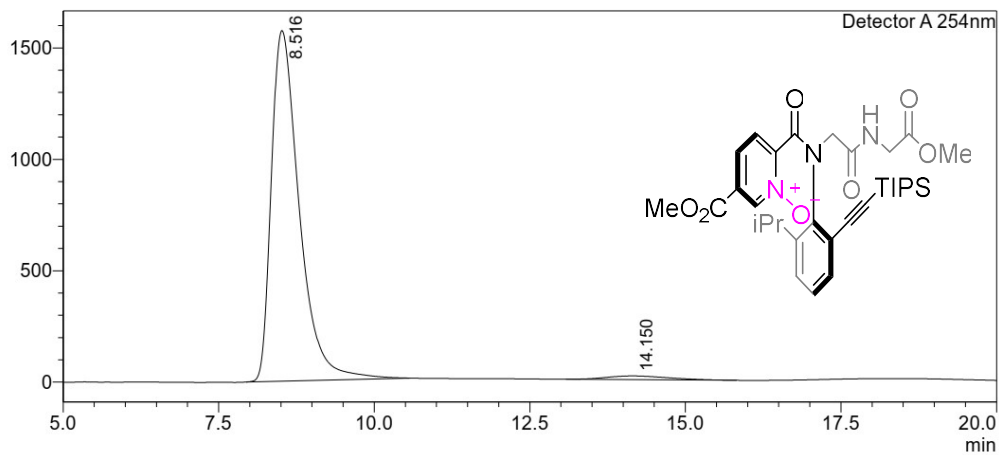

<Peak Table>

Detector A 254nm

| Peak# | Ret. Time | Area     | Height  | Conc.  | Unit | Mark | Name |
|-------|-----------|----------|---------|--------|------|------|------|
| 1     | 8.516     | 49110573 | 1573382 | 97.661 |      | M    |      |
| 2     | 14.150    | 1176155  | 16755   | 2.339  |      | M    |      |
| Total |           | 50286728 | 1590137 |        |      |      |      |



**3hb: AD-H, *n*-Hexane/*i*-PrOH = 80/20, rate = 0.8 mL/min, 254nm**

**<Chromatogram>**

mV

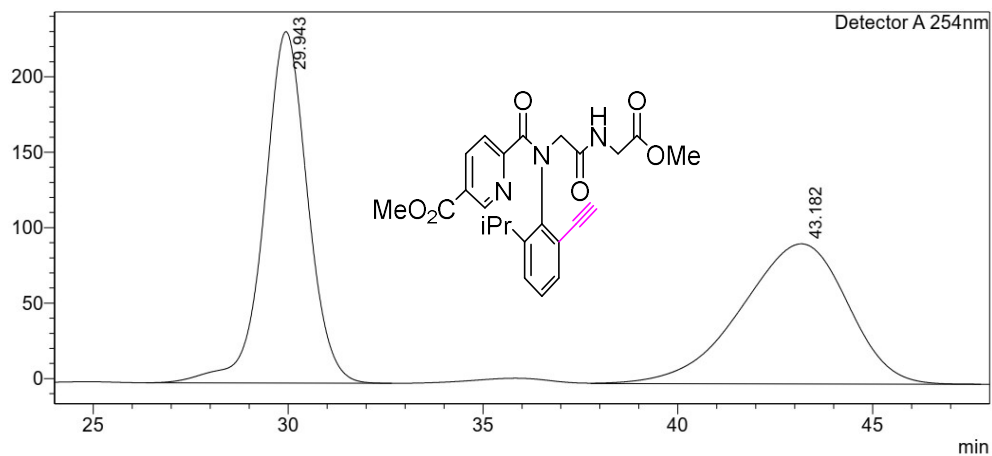

**<Peak Table>**

Detector A 254nm

| Peak# | Ret. Time | Area     | Height | Conc.  | Unit | Mark | Name |
|-------|-----------|----------|--------|--------|------|------|------|
| 1     | 29.943    | 18057778 | 232900 | 50.490 |      |      |      |
| 2     | 43.182    | 17707339 | 92843  | 49.510 |      |      |      |
| Total |           | 35765117 | 325743 |        |      |      |      |

**<Chromatogram>**

mV

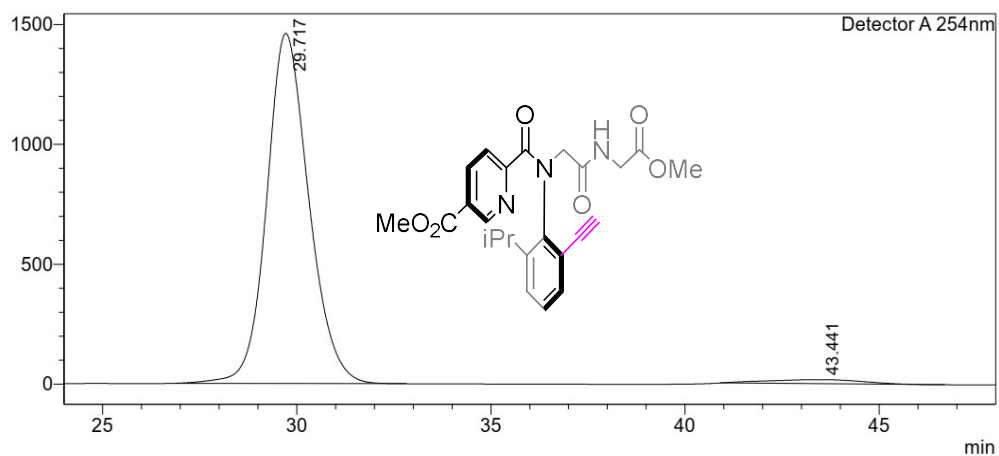

**<Peak Table>**

Detector A 254nm

| Peak# | Ret. Time | Area      | Height  | Conc.  | Unit | Mark | Name |
|-------|-----------|-----------|---------|--------|------|------|------|
| 1     | 29.717    | 110299012 | 1460271 | 97.424 |      | M    |      |
| 2     | 43.441    | 2916876   | 17180   | 2.576  |      | M    |      |
| Total |           | 113215888 | 1477452 |        |      |      |      |

**3hc: IF-3, *n*-Hexane/*i*-PrOH = 60/40, rate = 0.6 mL/min, 254 nm**

**<Chromatogram>**

mV

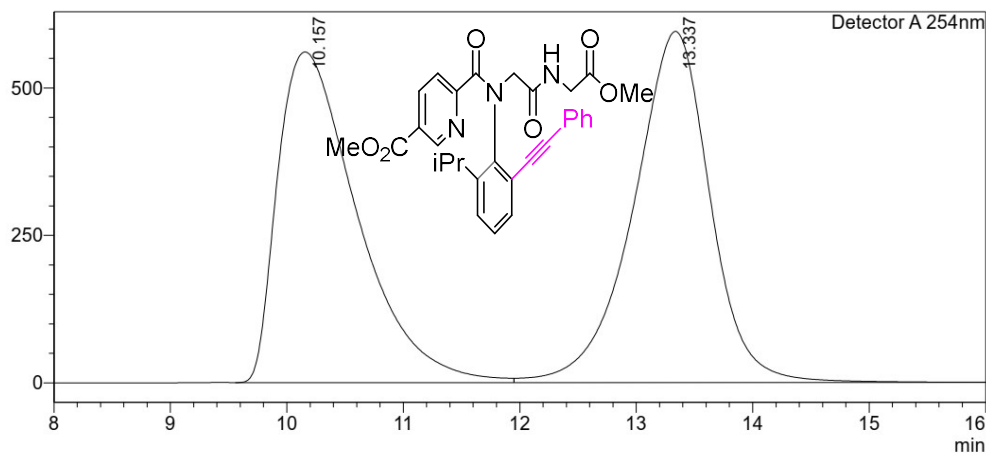

**<Peak Table>**

Detector A 254nm

| Peak# | Ret. Time | Area     | Height  | Conc.  | Unit | Mark | Name |
|-------|-----------|----------|---------|--------|------|------|------|
| 1     | 10.157    | 26714773 | 560803  | 49.420 |      |      |      |
| 2     | 13.337    | 27342195 | 595455  | 50.580 |      | V    |      |
| Total |           | 54056968 | 1156258 |        |      |      |      |

**<Chromatogram>**

mV

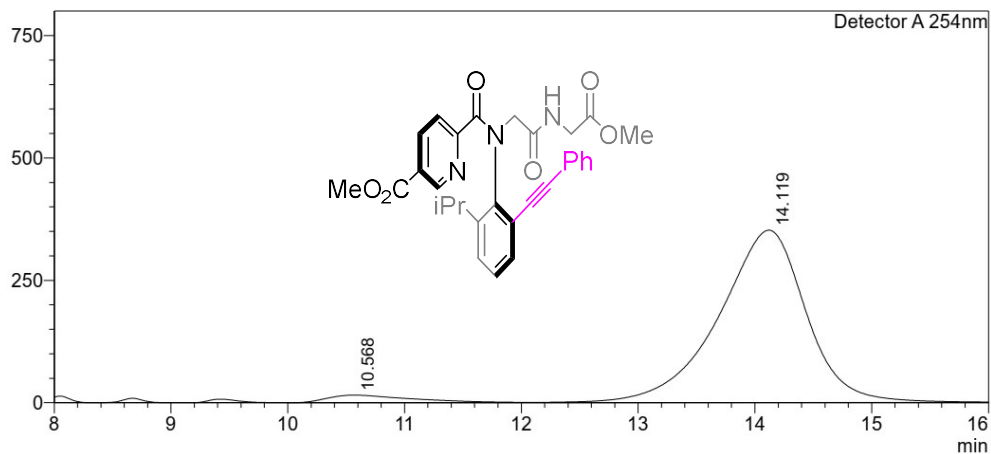

**<Peak Table>**

Detector A 254nm

| Peak# | Ret. Time | Area     | Height | Conc.  | Unit | Mark | Name |
|-------|-----------|----------|--------|--------|------|------|------|
| 1     | 10.568    | 825817   | 15828  | 4.269  |      |      |      |
| 2     | 14.119    | 18520846 | 352443 | 95.731 |      | V    |      |
| Total |           | 19346663 | 368271 |        |      |      |      |

3hd: IF-3, *n*-Hexane/*i*-PrOH = 50/50, rate = 0.8 mL/min, 254nm

<Chromatogram>

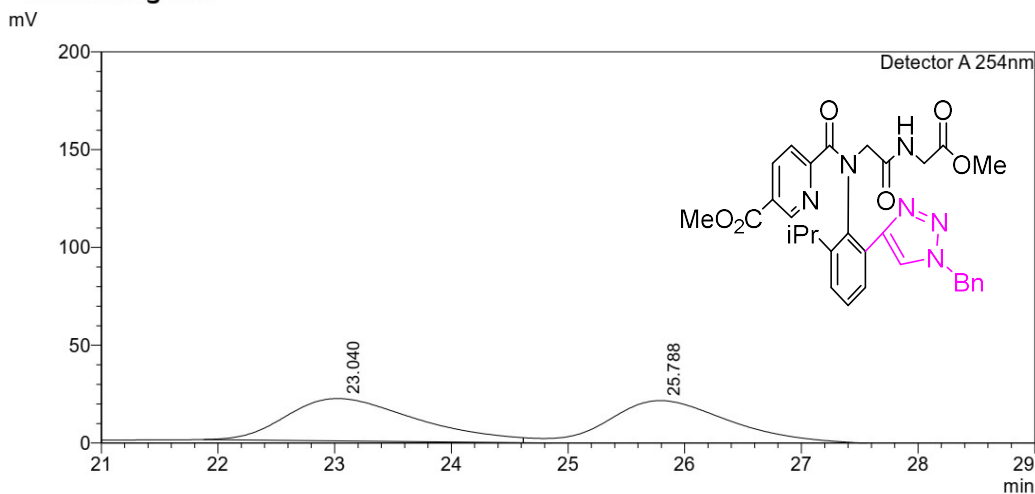

<Peak Table>

Detector A 254nm

| Peak# | Ret. Time | Area    | Height | Conc.  | Unit | Mark | Name |
|-------|-----------|---------|--------|--------|------|------|------|
| 1     | 23.040    | 1686029 | 21637  | 49.612 |      | M    |      |
| 2     | 25.788    | 1712367 | 22124  | 50.388 |      | V M  |      |
| Total |           | 3398396 | 43761  |        |      |      |      |

<Chromatogram>

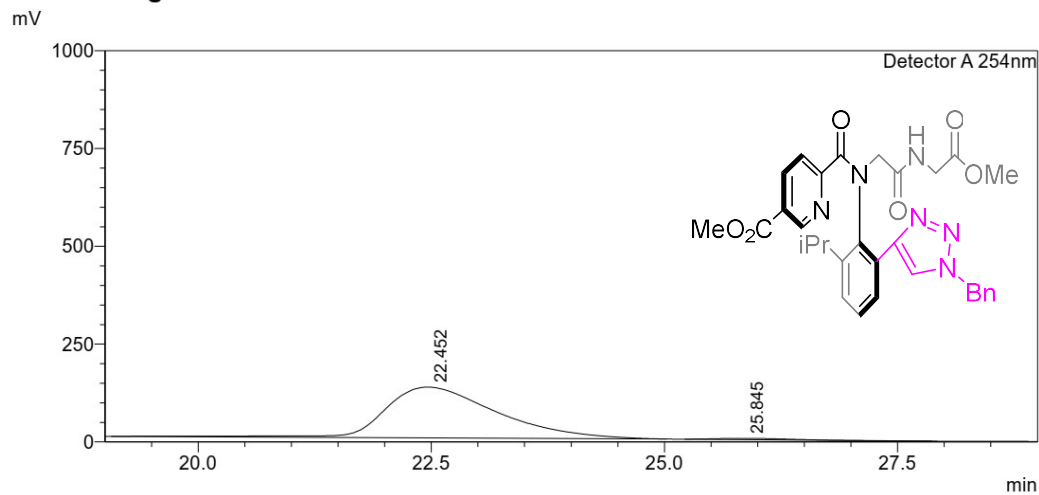

<Peak Table>

Detector A 254nm

| Peak# | Ret. Time | Area     | Height | Conc.  | Unit | Mark | Name |
|-------|-----------|----------|--------|--------|------|------|------|
| 1     | 22.452    | 10866611 | 129728 | 98.429 |      | M    |      |
| 2     | 25.845    | 173433   | 3259   | 1.571  |      | M    |      |
| Total |           | 11040044 | 132986 |        |      |      |      |
